# Supplementary material for: The whole-cell pertussis vaccine imposes a broad effector B cell response in mouse heterologous prime-boost settings
Source: PubMed Central journal article supplement (PMC9675447; doi:10.1172/jci.insight.157034), 2022-11-08
Supplement: jciinsight-7-157034-s020.pdf [file jciinsight-7-157034-s020.pdf]

**The whole-cell pertussis vaccine imposes a broad effector B-cell response in mouse heterologous prime-boost settings**

Viviana Valeri<sup>1</sup>, Akhésa Sochon<sup>1\*</sup>, Clara Cousu<sup>1\*</sup>, Pascal Chappert<sup>1</sup>, Damiana Lecoeuche<sup>1</sup>, Pascal Blanc<sup>2\*\*</sup>, Jean-Claude Weill<sup>1\*\*</sup> and Claude-Agnès Reynaud<sup>1\*\*</sup>

1 : Institut Necker-Enfants Malades, INSERM U1151/CNRS UMR 8253, Université Paris Descartes, Sorbonne Paris Cité, 75993 Paris Cedex 14, France.

2 : Sanofi-Pasteur R&D, Marcy l'Etoile, France

\* These authors equally contributed to the work

\*\* Shared senior authorship

Corresponding author: Viviana Valeri, Institut Necker-Enfants Malades, INSERM U1151, Faculté de Médecine Paris Descartes, 150-156 rue de Vaugirard, 75015 Paris, phone (+33) 0614968400, email [viviana.valeri@inserm.fr](mailto:viviana.valeri@inserm.fr)

Conflict of interest: Outside of the submitted work, J.-C.W. received consulting fees from Institut Mérieux. P.B. is employed by Sanofi-Pasteur and may hold shares and/or stock options in the company. Other authors have nothing to disclose.

Supplemental figure 1

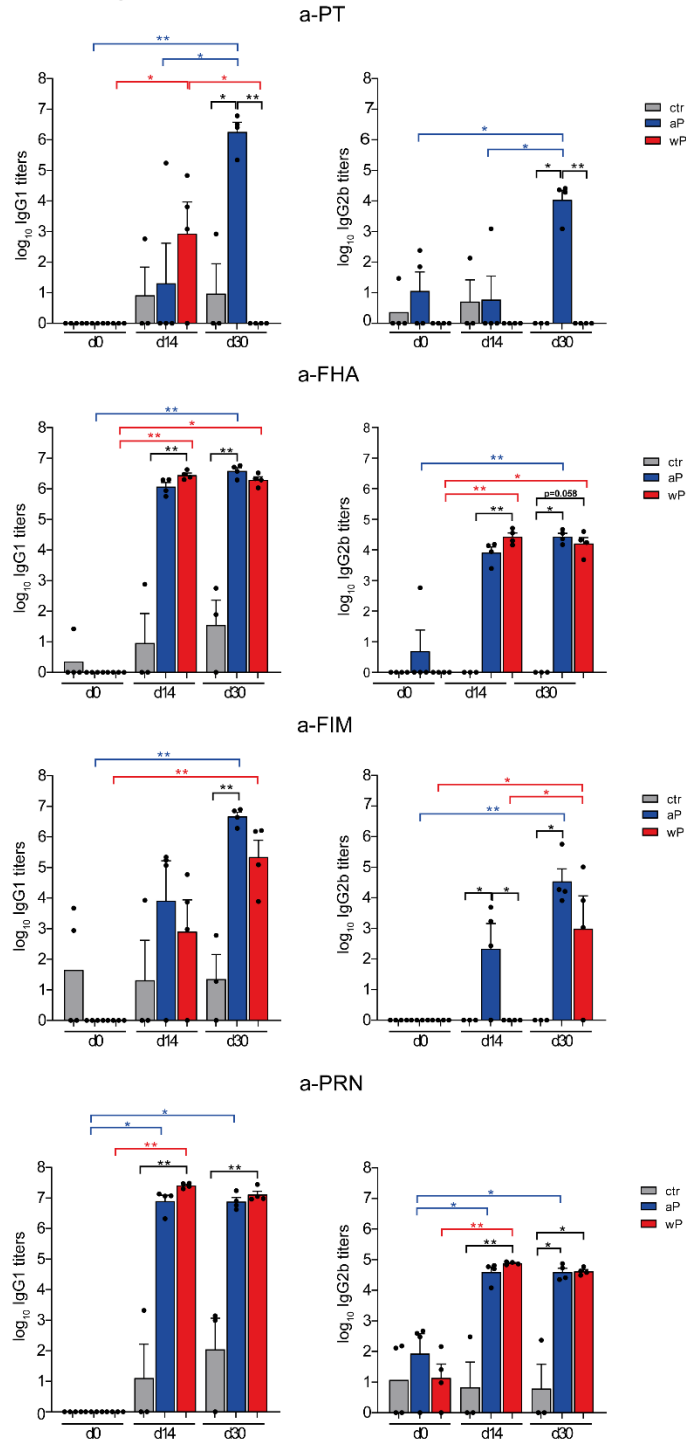

**Supplemental figure 1: The wP-prime is inefficient at inducing anti-Pertussis Toxin (PT) IgG1<sup>+</sup> and IgG2b<sup>+</sup> antibodies.** Blood was collected at d0, d14 and d30 from AID-Cre-EYFP mice s.c. injected either with aP (acellular Pertussis) or wP (whole-cell Pertussis) vaccines, or with Alum (ctr=control mice). Multiplex MSD® assay was performed to detect IgG1 and IgG2b titers directed against each single aP protein: PT, PRN, FHA, Fim2,3. Each point in the graphs represents an arbitrary unit expressed in log<sub>10</sub> relative to an individual mouse. A representative experiment is shown. Means (±SEM) are shown. Kruskal-Wallis analysis with uncorrected Dunn's test was performed to compare the different conditions at each time point and the different time points between the same condition. \*p<0.05, \*\*p<0.01.

Supplemental figure 2

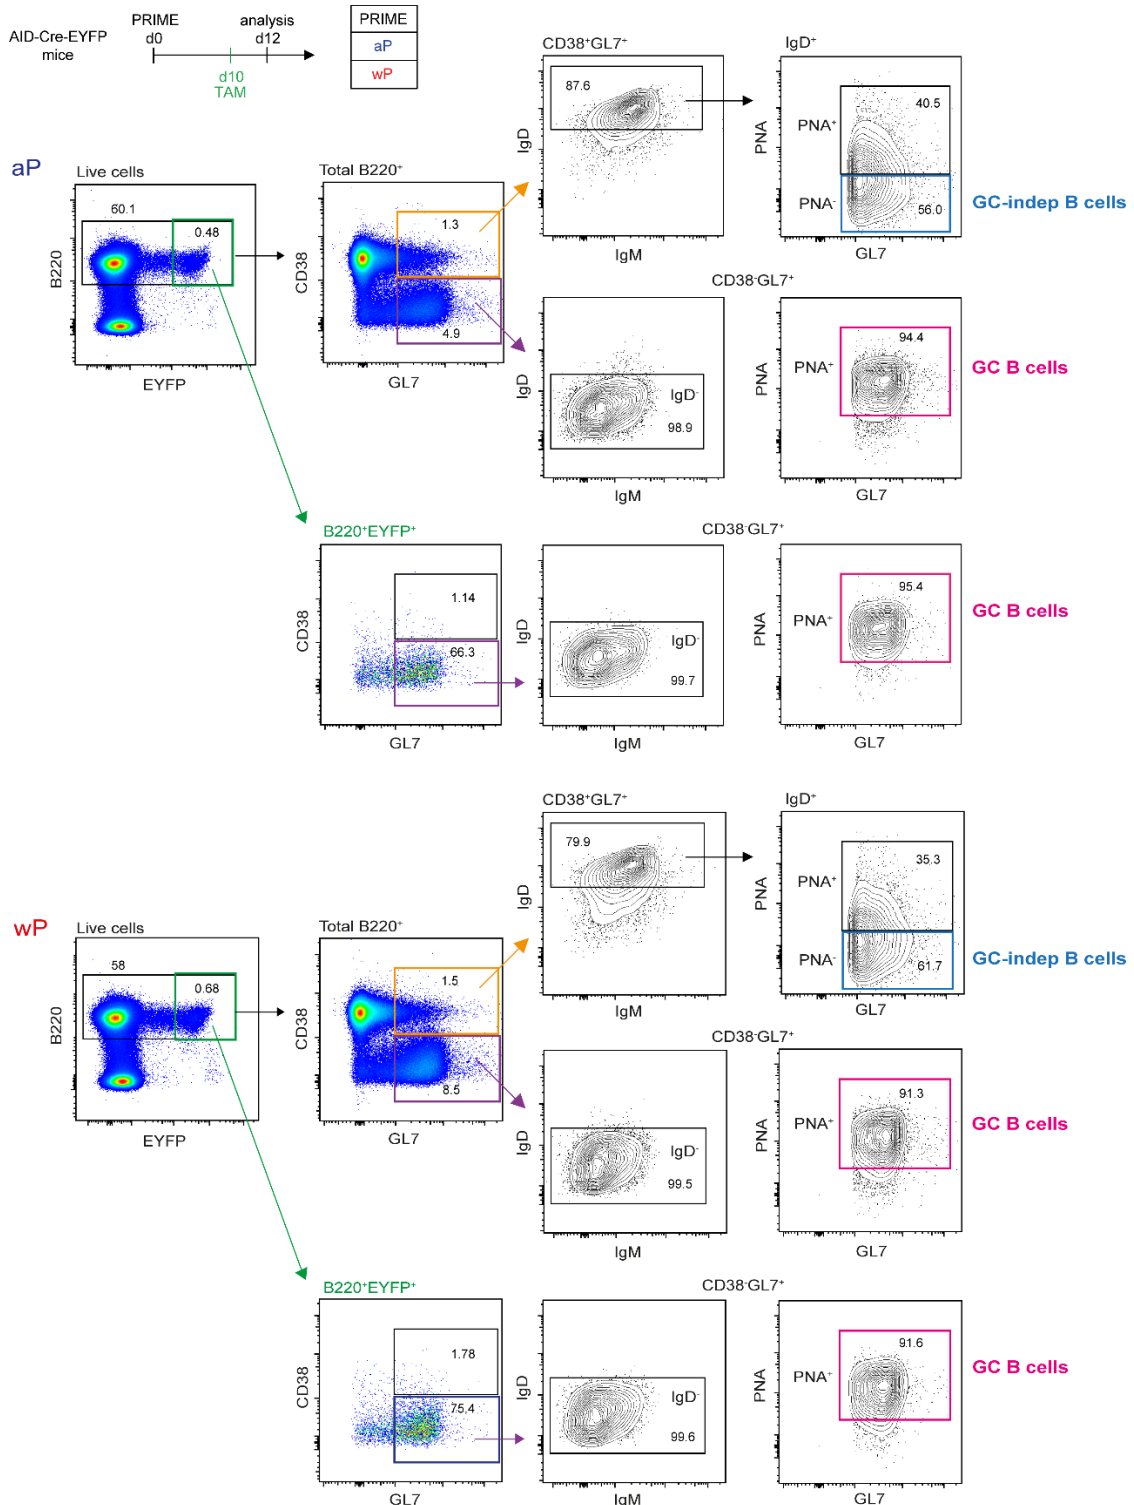

**Supplemental figure 2: The AID-Cre-EYFP fate mapping model does not mark GC-independent, activated B cells.** AID-Cre-EYFP mice were s.c. injected either with aP or wP vaccines, received tamoxifen gavage on d10 and dLNs were analyzed on d12. Representative flow cytometry plots for both aP- and wP-vaccinated mice show CD38 versus GL7 labeling on total B220<sup>+</sup> B cells. Germinal center (GC)-independent B cells can be identified among the CD38<sup>+</sup>GL7<sup>+</sup> and IgD<sup>+</sup> cell population. Those cells are largely PNA<sup>-</sup> cells. CD38<sup>-</sup>GL7<sup>+</sup> cells represent GC B cells which are IgD<sup>-</sup> and PNA<sup>+</sup> cells. The EYFP<sup>+</sup> labeled GL7<sup>+</sup> B cell population consists almost entirely of CD38<sup>-</sup>, IgD<sup>-</sup> and PNA<sup>+</sup> GC B cells.

Supplemental figure 3

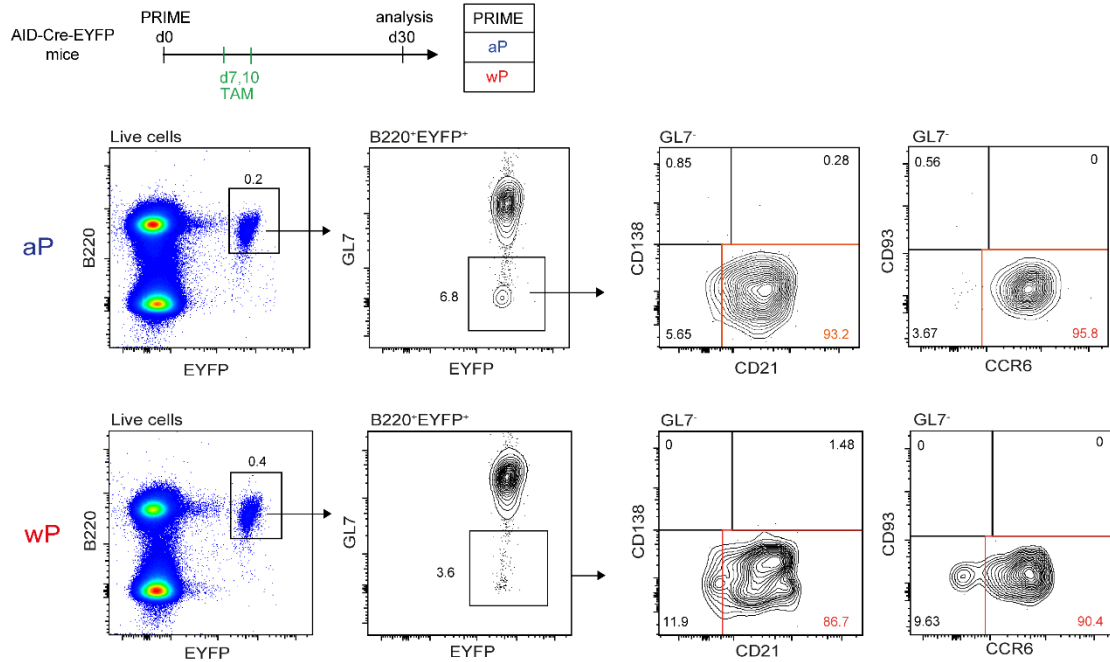

**Supplemental figure 3: B220<sup>+</sup>EYFP<sup>+</sup>GL7<sup>-</sup> memory B cells do not include plasmablasts.**

AID-Cre-EYFP mice were primed with aP or wP vaccines, received two doses of tamoxifen at d7 and 10 after prime vaccination and dLNs were analyzed on d30. B220<sup>+</sup>EYFP<sup>+</sup>GL7<sup>-</sup> gated memory B cells were analyzed by flow cytometry for the expression of CD138, CD21, CD93 and CCR6 markers. Two representative analyses show that the memory B cell population is largely CD21<sup>+</sup>CD138<sup>-</sup> and CCR6<sup>+</sup>CD93<sup>-</sup>.

Supplemental figure 4

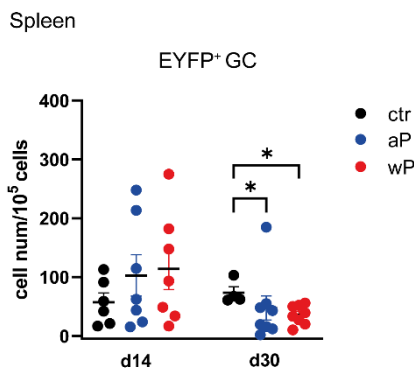

**Supplemental figure 4: No primary GC B cell response is identified in spleen of vaccinated mice.**

AID-Cre-EYFP mice were primed with aP or wP vaccines or injected with Alum (ctr) and received two doses of tamoxifen at d7 and 10 after prime vaccination. Mouse spleens were analyzed at d14 and 30 and EYFP<sup>+</sup> GC B cell numbers (relative to 10<sup>5</sup> splenocytes) are shown in the graph. At least two independent experiments were performed for the analysis. Each point in the charts represents an individual mouse. Means (±SEM) are shown. Kruskal-Wallis analysis with uncorrected Dunn's test was performed to compare the different conditions at each time point. \*p<0.05.

Supplemental figure 5

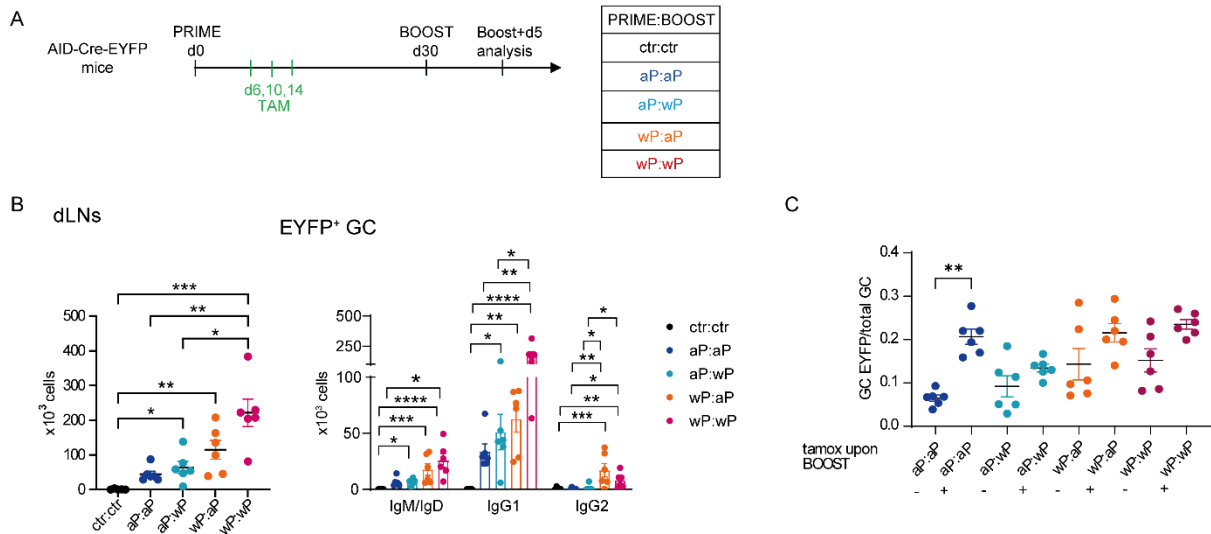

**Supplemental figure 5: A comparable amount of naïve B cell recruitment between the aP and wP primed groups is observed upon boost. (A)** AID-Cre-EYFP mice were primed and boosted (day 30) with homologous and heterologous combinations of the aP and wP vaccines or injected with Alum. Three doses of tamoxifen were administered at d6, 10 and 14. Mice were analyzed at d35. **(B)** The graphs show cell numbers and isotype distribution of EYFP<sup>+</sup> GC cells determined by flow cytometry in dLNs. **(C)** Ratios between EYFP<sup>+</sup> GC and total GC B cells in dLNs from two different tamoxifen strategies are reported in the plot. Each point in the graphs represents an individual mouse. At least two independent experiments were performed for each analysis. Means ( $\pm$ SEM) are shown. Kruskal-Wallis analysis with uncorrected Dunn's test was performed to compare the different conditions. \* $p < 0.05$ , \*\* $p < 0.01$ , \*\*\* $p < 0.001$ . ns=not statistically significant.

Supplemental figure 6

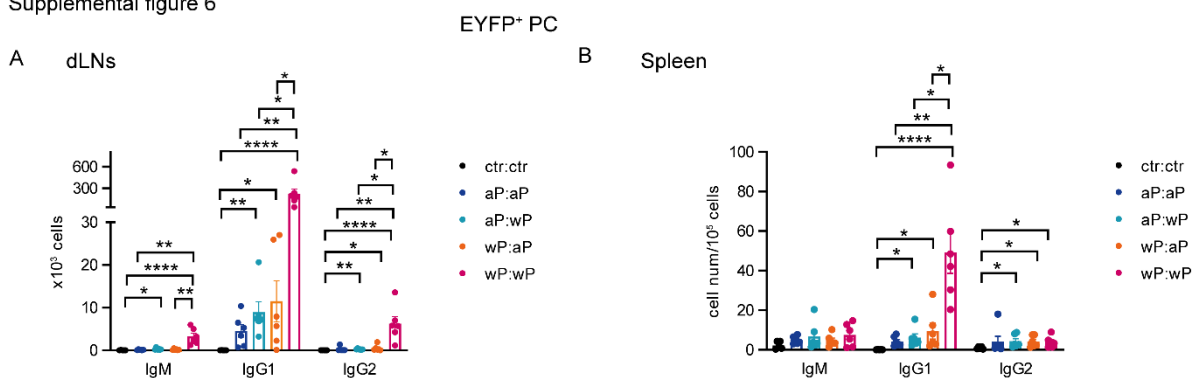

**Supplemental figure 6: IgG1<sup>+</sup> PCs are predominant compared to other isotypes.** AID-Cre-EYFP mice were primed and boosted (day 30) with homologous and heterologous combinations of the aP and wP vaccines or injected with Alum (ctr). Three doses of tamoxifen were administered at d7, 10 and 31. Mice were analyzed at d35. EYFP<sup>+</sup> PCs were assessed by flow cytometry in dLNs **(A)** or spleen **(B)** and isotype distribution is reported in the graphs. Each point depicts an individual mouse and at least two independent experiments were performed for each analysis. Means ( $\pm$ SEM) are shown. Kruskal-Wallis analysis with uncorrected Dunn's test was performed to compare the different conditions. \* $p < 0.05$ , \*\* $p < 0.01$ , \*\*\*\* $p < 0.0001$ .

Supplemental figure 7

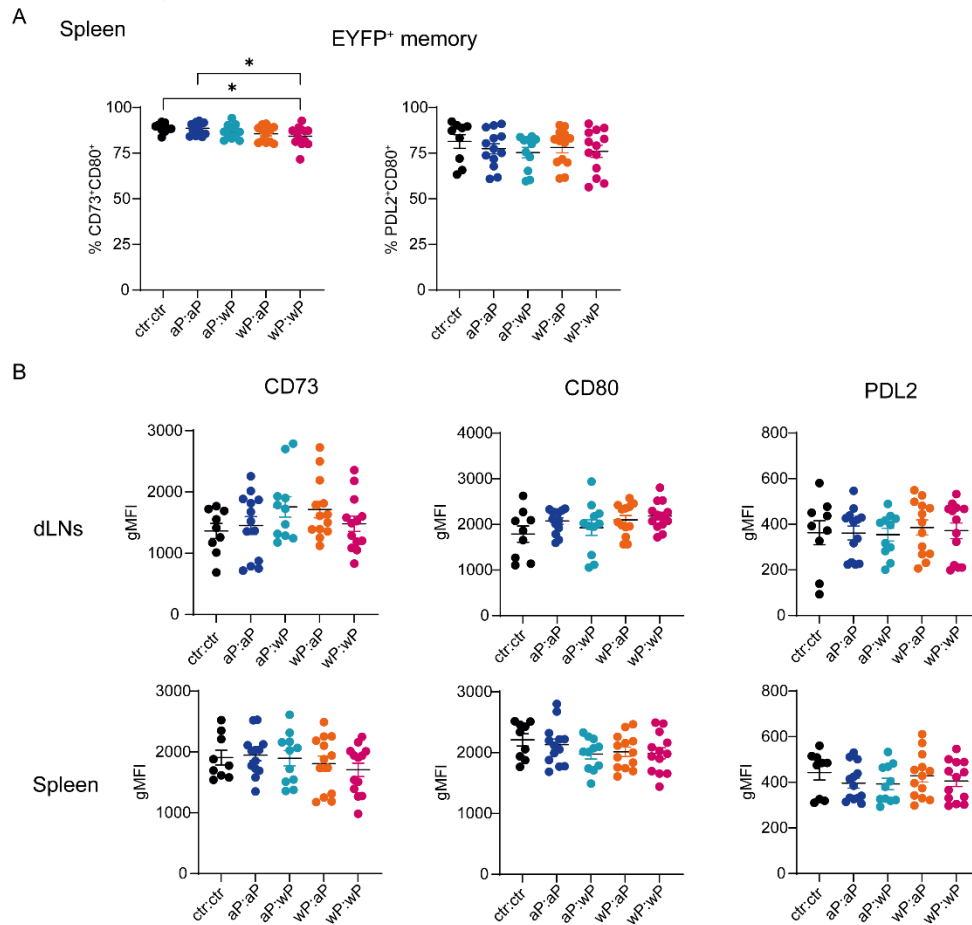

**Supplemental figure 7: The phenotype of vaccine-induced memory B cells in dLNs and the spleen is homogenous between the groups.** The expression of CD73, CD80 and PDL2 was determined on EYFP<sup>+</sup>GL7<sup>-</sup> memory cells by flow cytometry 50 days after boost from AID-Cre-EYFP mice that were primed and boosted (day 30) with homologous and heterologous combinations of the aP and wP vaccines or injected with Alum (ctr). Three doses of tamoxifen were administrated at d7, 10 and 31. **(A)** CD73<sup>+</sup>CD80<sup>+</sup> and PDL2<sup>+</sup>CD80<sup>+</sup> splenic memory EYFP<sup>+</sup> populations are shown in the graphs. **(B)** gMFI are indicated in the graphs for each membrane marker and for all vaccine combinations for both dLNs and spleen. Each point depicts an individual mouse and at least two independent experiments were performed for each analysis. Means ( $\pm$ SEM) are shown. Kruskal-Wallis analysis with uncorrected Dunn's test was performed to compare the different conditions. \* $p < 0.05$ .

Supplemental figure 8

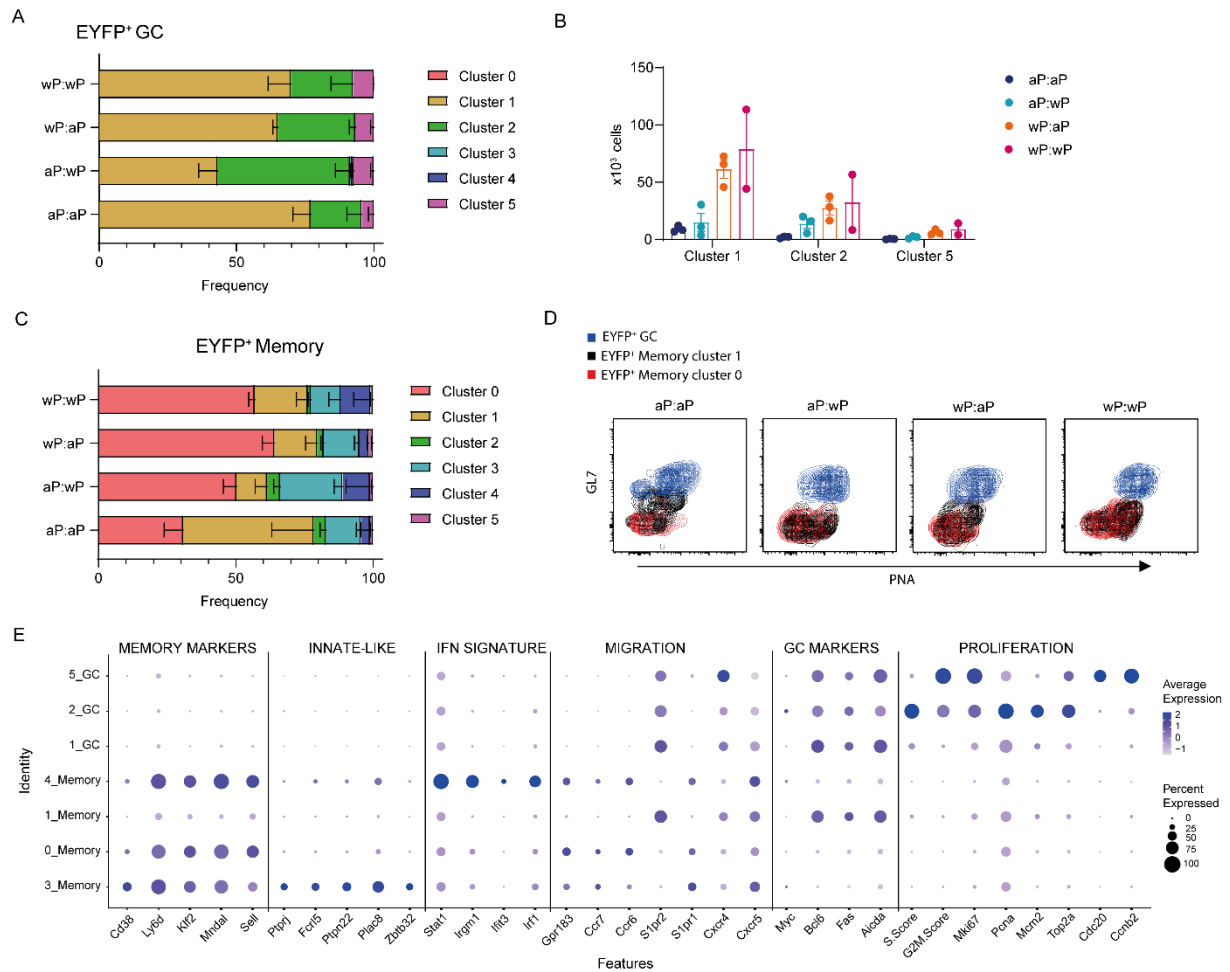

**Supplemental figure 8: Distribution of GC and memory B cells into 6 clusters by sc RNA-seq analysis.** (A) Frequency of EYFP<sup>+</sup> GC B cells in the different clusters are shown for the four vaccine combinations. (B) EYFP<sup>+</sup> GC B cell absolute numbers are shown for clusters 1, 2 and 4. (C) Frequencies of EYFP<sup>+</sup> memory B cells in the different clusters are shown for the four vaccine combinations. (D) GL7 *versus* PNA flow cytometry profile is determined for EYFP<sup>+</sup> GC (in blue), EYFP<sup>+</sup> memory cluster 1 (in black) and EYFP<sup>+</sup> memory cluster 0 (in red) for the four vaccine combinations. (E) Selected gene expression of both EYFP<sup>+</sup> memory and GC cells for the different clusters is presented in Dot Plot scale on normalized UMI counts, highlighting the similarity of GC and memory B cells from cluster 1.

Supplemental figure 9

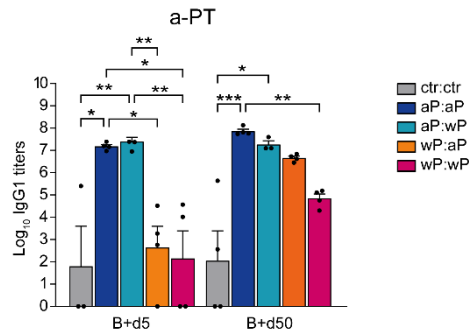

**Supplemental figure 9: The wP:wP prime:boost combination is less efficient at inducing anti-Pertussis Toxin (PT) IgG1<sup>+</sup> antibodies during a recall response.** Blood was collected 5 and 50 days after boost from AID-Cre-EYFP mice that were primed and boosted (day 30) with homologous and heterologous combinations of the aP and wP vaccines or injected with Alum (ctr). Multiplex MSD® assay was performed to detect IgG1 titers directed against PT. Each point in the graphs represents an arbitrary unit expressed in log<sub>10</sub> relative to an individual mouse. A representative experiment is shown. Means (±SEM) are shown. Kruskal-Wallis analysis with uncorrected Dunn's test was performed to compare the different conditions at each time point. \*p<0.05, \*\* p<0.01, \*\*\*p<0.001.

### Supplemental table 1: List of differentially expressed genes

See pdf file: [“Supplemental table 1. List of differentially expressed genes.pdf”](#)



**Supplemental table 2: List of antibodies and reagents used in the work**

| <b>Antibody</b>                | <b>Fluorochrome, clone</b>   | <b>Manufacturer</b> | <b>Catalog number</b> | <b>Batch</b> |
|--------------------------------|------------------------------|---------------------|-----------------------|--------------|
| Anti-mouse B220                | APC-eFluor780, clone RA3-6B2 | eBioscience         | 47-0452-82            | 2272766      |
| Anti-mouse CD138               | PE-Cy7, clone 281-2          | Biolegend           | 142514                | B291316      |
| Anti-mouse CD45.2              | AlexaFluor 700, clone 104    | Biolegend           | 109821                |              |
| Anti-mouse CD73                | PE-Cy7, clone eBioTY/11.8    | eBiosciences        | 25-0731-82            | 2016450      |
| Anti-mouse CD80                | APC, clone 16-10A1           | Biolegend           | 104714                | B227918      |
| Anti-mouse CD80                | BV510, clone 16-10A1         | Biolegend           | 104741                | B331397      |
| Anti-mouse GL7                 | EFluor450, clone GL7         | eBioscience         | 48-5902-82            | 2062737      |
| Anti-mouse GL7                 | PerCP-Cy5.5, clone GL7       | Biolegend           | 144610                | B326932      |
| Anti-mouse IgA                 | PE, clone 11-44-2            | eBioscience         | 12-5994-81            | 2252069      |
| Anti-mouse IgA                 | Biotin, clone RMA-1          | Sony                | 2635015               | 155924       |
| Anti-mouse IgD                 | PerCP-Cy5.5, clone 11-26c2a  | BD Biosciences      | 564273                | 9066574      |
| Anti-mouse IgG1                | APC, clone X56               | BD Biosciences      | 550874                | 58836        |
| Anti-mouse IgG2a               | PE, clone RMG2a-62           | Biolegend           | 407108                | B300880      |
| Anti-mouse IgG2b               | PE, clone RMG2b-1            | Biolegend           | 406708                | B321175      |
| Anti-mouse IgM                 | BV605, clone RMM-1           | Biolegend           | 406523                | B323099      |
| Anti-mouse PDL2                | BV510, clone TY25            | BD Biosciences      | 740194                | 9268285      |
| Anti-mouse PDL2                | Biotin, clone TY25           | eBioscience         | 13-5986-82            | B230798      |
| Anti-mouse PNA                 | Biotin                       | Vector Laboratories | B-1075                | ZD1101       |
| <b>Other staining reagents</b> | <b>(Fluorochrome)</b>        | <b>Manufacturer</b> | <b>Catalog number</b> | <b>Batch</b> |
| Live/Dead staining kit         | Excitation 405nm             | Invitrogen          | L34957                | 2145008      |
| Live/Dead staining kit         | Excitation UV 350nm          | Invitrogen          | L34961                | 2264488      |
| 7AAD viability solution        |                              | Biolegend           | 420403                |              |
| Streptavidin                   | BV785                        | Biolegend           | 405249                | B230798      |
| Streptavidin                   | PE-Cy7                       | Sony                | 2626030               | 178342       |
| 1X RBC Lysis Buffer            |                              | eBioscience         | 00-4333-57            |              |

| p_val    | avg_log2FC | pct.1 | pct.2 | p_val_adj | cluster | gene          |
|----------|------------|-------|-------|-----------|---------|---------------|
| 1,6E-145 | 1,230958   | 0,901 | 0,281 | 2E-141    | 0       | Mndal         |
| 4,4E-128 | -1,79087   | 0,397 | 0,811 | 5,5E-124  | 0       | Igj           |
| 4,7E-125 | -1,51427   | 0,086 | 0,646 | 5,9E-121  | 0       | Rgs13         |
| 1,1E-120 | 1,309692   | 0,749 | 0,24  | 1,3E-116  | 0       | Sell          |
| 4E-118   | 1,037446   | 0,994 | 0,739 | 4,9E-114  | 0       | Shisa5        |
| 1,4E-116 | -1,52203   | 0,487 | 0,822 | 1,7E-112  | 0       | Basp1         |
| 9E-114   | -1,37216   | 0,159 | 0,671 | 1,1E-109  | 0       | Mef2b         |
| 2,5E-109 | 1,024092   | 0,814 | 0,295 | 3,1E-105  | 0       | Ifi203        |
| 1,1E-108 | 0,996173   | 0,939 | 0,535 | 1,4E-104  | 0       | Gimap4        |
| 9,4E-108 | 1,093507   | 0,726 | 0,236 | 1,2E-103  | 0       | Klf2          |
| 1,3E-107 | 1,179154   | 0,857 | 0,428 | 1,6E-103  | 0       | Cmah          |
| 4,9E-99  | 0,967934   | 0,849 | 0,355 | 6,12E-95  | 0       | Ly6d          |
| 4,52E-98 | 0,95967    | 0,706 | 0,247 | 5,6E-94   | 0       | Capg          |
| 7,05E-98 | -0,95247   | 1     | 0,999 | 8,73E-94  | 0       | Cfl1          |
| 1,26E-92 | -1,13456   | 0,13  | 0,59  | 1,56E-88  | 0       | S1pr2         |
| 3,78E-91 | 0,955561   | 0,772 | 0,301 | 4,67E-87  | 0       | Pml           |
| 4,19E-88 | 0,834378   | 0,62  | 0,178 | 5,18E-84  | 0       | S100a10       |
| 4,93E-84 | 0,843936   | 1     | 0,957 | 6,1E-80   | 0       | Malat1        |
| 1,44E-83 | -1,06206   | 0,159 | 0,6   | 1,78E-79  | 0       | Bcl6          |
| 8,26E-79 | 0,780385   | 0,936 | 0,745 | 1,02E-74  | 0       | Btg1          |
| 1,04E-77 | 0,839504   | 0,483 | 0,111 | 1,29E-73  | 0       | Gpr183        |
| 1,56E-76 | -1,06969   | 0,162 | 0,583 | 1,93E-72  | 0       | 8430410A17Rik |
| 7,23E-76 | 0,736021   | 0,426 | 0,082 | 8,95E-72  | 0       | Ccr6          |
| 5,14E-74 | -0,96916   | 0,494 | 0,804 | 6,37E-70  | 0       | Txn1          |
| 7,97E-74 | 0,572115   | 1     | 0,993 | 9,87E-70  | 0       | B2m           |
| 5,27E-71 | 0,752539   | 0,584 | 0,183 | 6,52E-67  | 0       | Bcl2          |
| 8,03E-69 | 0,821085   | 0,943 | 0,758 | 9,95E-65  | 0       | Macf1         |
| 8,28E-69 | -1,37274   | 0,22  | 0,592 | 1,03E-64  | 0       | Hmgb2         |
| 2,19E-68 | -0,80503   | 0,07  | 0,45  | 2,71E-64  | 0       | Eaf2          |
| 5,72E-68 | 0,763115   | 0,457 | 0,112 | 7,08E-64  | 0       | Zfp318        |
| 6,1E-67  | 0,64707    | 0,622 | 0,211 | 7,56E-63  | 0       | Gm1966        |
| 9,57E-65 | -0,69103   | 0,897 | 0,969 | 1,19E-60  | 0       | Nap1l1        |
| 1,24E-63 | -0,71949   | 0,049 | 0,406 | 1,54E-59  | 0       | Lipc          |
| 1,73E-63 | 0,585272   | 1     | 0,97  | 2,15E-59  | 0       | H2-K1         |
| 1,09E-62 | 0,665348   | 0,487 | 0,144 | 1,34E-58  | 0       | Itgb7         |
| 9,62E-62 | -0,68446   | 0,039 | 0,384 | 1,19E-57  | 0       | Nuggc         |
| 1,29E-61 | -0,93604   | 0,265 | 0,633 | 1,6E-57   | 0       | Aicda         |
| 9,51E-61 | 0,824525   | 0,79  | 0,502 | 1,18E-56  | 0       | Lmo2          |
| 4,09E-60 | -0,73899   | 0,296 | 0,674 | 5,06E-56  | 0       | Ppp4r2        |
| 4,93E-60 | 0,79108    | 0,777 | 0,461 | 6,11E-56  | 0       | Bank1         |
| 2,07E-59 | -0,75133   | 0,497 | 0,793 | 2,56E-55  | 0       | Arpc5l        |
| 2,21E-59 | -0,85516   | 0,213 | 0,583 | 2,74E-55  | 0       | Dck           |
| 1,27E-58 | -0,59497   | 0,996 | 0,998 | 1,58E-54  | 0       | Actg1         |
| 2,1E-58  | 0,726274   | 0,664 | 0,292 | 2,6E-54   | 0       | Sub1          |
| 3,24E-58 | -0,78767   | 0,778 | 0,916 | 4,02E-54  | 0       | Cd24a         |
| 1,55E-57 | 0,736845   | 0,626 | 0,29  | 1,92E-53  | 0       | Anxa6         |
| 1,68E-57 | -0,58604   | 0,977 | 0,994 | 2,08E-53  | 0       | Ms4a1         |
| 2,17E-57 | -0,95239   | 0,203 | 0,547 | 2,69E-53  | 0       | Gcsam         |
| 2,96E-57 | 0,6469     | 0,483 | 0,153 | 3,67E-53  | 0       | Serpinb1a     |

|          |          |       |       |          |   |               |
|----------|----------|-------|-------|----------|---|---------------|
| 8,24E-57 | -0,7678  | 0,638 | 0,846 | 1,02E-52 | 0 | Gapdh         |
| 2,63E-56 | -1,17118 | 0,162 | 0,502 | 3,26E-52 | 0 | Stmn1         |
| 3,42E-56 | -0,65673 | 0,077 | 0,418 | 4,23E-52 | 0 | Rassf6        |
| 4,6E-56  | 0,777161 | 0,699 | 0,367 | 5,7E-52  | 0 | Fam65b        |
| 5,66E-55 | 0,657514 | 0,446 | 0,131 | 7E-51    | 0 | Cd55          |
| 1,26E-54 | 0,386912 | 1     | 1     | 1,56E-50 | 0 | H2-Aa         |
| 1,76E-54 | 0,771255 | 0,62  | 0,296 | 2,18E-50 | 0 | Add3          |
| 4,96E-54 | -0,88093 | 0,314 | 0,643 | 6,14E-50 | 0 | Mtf2          |
| 1,24E-53 | -0,77912 | 0,196 | 0,547 | 1,54E-49 | 0 | Mbd4          |
| 4,15E-53 | -0,66384 | 0,207 | 0,557 | 5,14E-49 | 0 | Glrx3         |
| 5,57E-53 | -0,88856 | 0,371 | 0,69  | 6,89E-49 | 0 | Klhl6         |
| 6,48E-53 | 0,496477 | 0,999 | 0,984 | 8,03E-49 | 0 | H2-D1         |
| 1,67E-52 | 0,672669 | 0,616 | 0,271 | 2,06E-48 | 0 | Snn           |
| 2,38E-52 | 0,656015 | 0,407 | 0,112 | 2,95E-48 | 0 | Arhgef18      |
| 5,07E-52 | -0,55128 | 0,025 | 0,321 | 6,27E-48 | 0 | Rgs10         |
| 5,83E-52 | 0,378106 | 1     | 0,999 | 7,22E-48 | 0 | Rps24         |
| 9,1E-52  | -0,6426  | 0,094 | 0,418 | 1,13E-47 | 0 | Dstn          |
| 1,49E-51 | -0,73599 | 0,439 | 0,741 | 1,84E-47 | 0 | Hmgn1         |
| 2,88E-51 | 0,455814 | 1     | 0,998 | 3,57E-47 | 0 | Ly6e          |
| 3,89E-51 | 0,725494 | 0,612 | 0,283 | 4,82E-47 | 0 | B3gnt5        |
| 9,43E-51 | -0,82969 | 0,47  | 0,739 | 1,17E-46 | 0 | Top1          |
| 1,09E-50 | 0,692797 | 0,762 | 0,483 | 1,35E-46 | 0 | Gimap6        |
| 3,91E-49 | -0,65278 | 0,188 | 0,527 | 4,84E-45 | 0 | Dcaf12        |
| 4,17E-49 | 0,567093 | 0,287 | 0,053 | 5,16E-45 | 0 | Myo1f         |
| 1,45E-48 | -0,72351 | 0,664 | 0,866 | 1,79E-44 | 0 | Pou2af1       |
| 4,31E-48 | 0,702685 | 0,543 | 0,237 | 5,34E-44 | 0 | Map3k1        |
| 7,3E-48  | 0,832611 | 0,672 | 0,379 | 9,04E-44 | 0 | Dock10        |
| 8,01E-48 | -0,67076 | 0,168 | 0,49  | 9,92E-44 | 0 | 2700029M09Rik |
| 9,68E-48 | 0,669647 | 0,817 | 0,607 | 1,2E-43  | 0 | Scd1          |
| 1E-47    | 0,537465 | 0,296 | 0,059 | 1,24E-43 | 0 | Kctd14        |
| 7,36E-47 | -1,02902 | 0,613 | 0,806 | 9,11E-43 | 0 | Hmgn2         |
| 5,59E-46 | 0,740368 | 0,677 | 0,383 | 6,92E-42 | 0 | Txnip         |
| 9,1E-46  | -0,79514 | 0,184 | 0,498 | 1,13E-41 | 0 | Lpp           |
| 1,09E-45 | 0,621945 | 0,73  | 0,428 | 1,35E-41 | 0 | Gimap3        |
| 2,26E-45 | -0,6078  | 0,242 | 0,573 | 2,8E-41  | 0 | Rfc1          |
| 5,13E-45 | -0,64579 | 0,661 | 0,858 | 6,35E-41 | 0 | Slc25a5       |
| 6,25E-45 | -1,10015 | 0,536 | 0,759 | 7,74E-41 | 0 | H2afz         |
| 9,22E-45 | 0,650633 | 0,91  | 0,73  | 1,14E-40 | 0 | Mycbp2        |
| 2,32E-44 | -0,68948 | 0,528 | 0,782 | 2,87E-40 | 0 | Rhoh          |
| 5,44E-44 | -1,05981 | 0,128 | 0,417 | 6,73E-40 | 0 | Mki67         |
| 6,78E-44 | 0,458277 | 1     | 0,991 | 8,4E-40  | 0 | Rps21         |
| 1,99E-43 | 0,749668 | 0,672 | 0,396 | 2,47E-39 | 0 | Itga4         |
| 2,57E-43 | -0,67868 | 0,343 | 0,645 | 3,18E-39 | 0 | Apobec1       |
| 2,93E-43 | -0,64849 | 0,114 | 0,413 | 3,63E-39 | 0 | Rgs2          |
| 6,18E-43 | 0,593776 | 0,496 | 0,213 | 7,65E-39 | 0 | Lrrc33        |
| 1,24E-42 | 0,62407  | 0,848 | 0,675 | 1,54E-38 | 0 | Stk17b        |
| 1,28E-42 | 0,510031 | 0,428 | 0,15  | 1,58E-38 | 0 | Hhex          |
| 2,82E-42 | -0,88375 | 0,207 | 0,496 | 3,49E-38 | 0 | Mcm6          |
| 3,22E-42 | -0,76859 | 0,475 | 0,713 | 3,99E-38 | 0 | Ran           |
| 7,09E-42 | 0,73389  | 0,772 | 0,566 | 8,78E-38 | 0 | B4galnt1      |

|          |          |       |       |          |   |               |
|----------|----------|-------|-------|----------|---|---------------|
| 3E-41    | 0,591651 | 0,361 | 0,112 | 3,72E-37 | 0 | Scml4         |
| 6,52E-41 | -0,52873 | 0,065 | 0,333 | 8,07E-37 | 0 | Sh2b2         |
| 7,67E-41 | -0,56663 | 0,154 | 0,45  | 9,5E-37  | 0 | Dap           |
| 1,47E-40 | -0,4739  | 0,035 | 0,286 | 1,82E-36 | 0 | Mybl1         |
| 4,51E-40 | 0,747113 | 0,568 | 0,296 | 5,58E-36 | 0 | Dgka          |
| 1,53E-39 | -0,476   | 0,07  | 0,337 | 1,89E-35 | 0 | Ccnd3         |
| 1,6E-39  | -0,52139 | 0,106 | 0,385 | 1,98E-35 | 0 | Xrcc1         |
| 4,07E-39 | 0,424476 | 0,219 | 0,035 | 5,04E-35 | 0 | Fam46a        |
| 4,51E-39 | 0,661415 | 0,681 | 0,423 | 5,59E-35 | 0 | Itm2b         |
| 7,67E-39 | -0,57609 | 0,143 | 0,432 | 9,5E-35  | 0 | Lpin2         |
| 1,17E-38 | -0,58739 | 0,981 | 0,984 | 1,45E-34 | 0 | Ucp2          |
| 1,44E-38 | 0,59519  | 0,501 | 0,235 | 1,79E-34 | 0 | Ier5          |
| 1,88E-38 | 0,510027 | 0,229 | 0,041 | 2,32E-34 | 0 | Sspn          |
| 4,18E-38 | -0,70343 | 0,291 | 0,579 | 5,17E-34 | 0 | Hpse          |
| 4,48E-38 | 0,543224 | 0,491 | 0,229 | 5,55E-34 | 0 | Tspan32       |
| 5,7E-38  | 0,57416  | 0,949 | 0,857 | 7,06E-34 | 0 | Zfp36l1       |
| 1,09E-37 | 0,843314 | 0,754 | 0,564 | 1,35E-33 | 0 | Fcer2a        |
| 1,09E-37 | -0,58368 | 0,864 | 0,94  | 1,35E-33 | 0 | Ppia          |
| 1,34E-37 | -0,48006 | 0,941 | 0,965 | 1,66E-33 | 0 | Myl6          |
| 2,15E-37 | 0,531711 | 0,526 | 0,262 | 2,67E-33 | 0 | Myl12b        |
| 2,58E-37 | -0,48984 | 0,074 | 0,328 | 3,19E-33 | 0 | Cecr2         |
| 2,89E-37 | 0,426431 | 0,286 | 0,072 | 3,58E-33 | 0 | Cnn3          |
| 3,46E-37 | -0,63666 | 0,396 | 0,667 | 4,28E-33 | 0 | Tmem131       |
| 4,72E-37 | -0,65683 | 0,346 | 0,627 | 5,84E-33 | 0 | Marcks1       |
| 7,98E-37 | -0,50789 | 0,193 | 0,472 | 9,88E-33 | 0 | Dbi           |
| 1,37E-36 | -0,49331 | 0,987 | 0,995 | 1,69E-32 | 0 | Pabpc1        |
| 1,87E-36 | -0,55249 | 0,216 | 0,506 | 2,31E-32 | 0 | Odc1          |
| 3,53E-36 | -0,5479  | 0,162 | 0,441 | 4,37E-32 | 0 | Ell3          |
| 4,53E-36 | -0,64181 | 0,409 | 0,679 | 5,61E-32 | 0 | Mbd2          |
| 6,09E-36 | -0,47699 | 0,029 | 0,252 | 7,54E-32 | 0 | H1fx          |
| 7,07E-36 | 0,604539 | 0,659 | 0,417 | 8,76E-32 | 0 | Gimap8        |
| 1,15E-35 | 0,508745 | 0,543 | 0,276 | 1,42E-31 | 0 | Cyb561a3      |
| 2,81E-35 | -0,42767 | 0,991 | 0,994 | 3,48E-31 | 0 | Rpl28         |
| 2,86E-35 | -0,58081 | 0,622 | 0,805 | 3,54E-31 | 0 | Ywhae         |
| 5,99E-35 | 0,616476 | 0,625 | 0,366 | 7,42E-31 | 0 | Evi2b         |
| 9,66E-35 | -0,43593 | 0,045 | 0,274 | 1,2E-30  | 0 | Endou         |
| 1,75E-34 | 0,484553 | 0,409 | 0,166 | 2,17E-30 | 0 | 2900060B14Rik |
| 2,5E-34  | 0,418843 | 0,358 | 0,123 | 3,09E-30 | 0 | Sbk1          |
| 2,8E-34  | -0,44058 | 0,113 | 0,374 | 3,46E-30 | 0 | Mtmr14        |
| 3,21E-34 | -0,46701 | 0,072 | 0,311 | 3,97E-30 | 0 | Gadd45b       |
| 6,59E-34 | -0,59005 | 0,478 | 0,732 | 8,16E-30 | 0 | Erp44         |
| 8,59E-34 | -0,44769 | 0,974 | 0,988 | 1,06E-29 | 0 | Arpc2         |
| 1,67E-33 | -0,47206 | 0,945 | 0,977 | 2,07E-29 | 0 | Calm1         |
| 1,81E-33 | -0,56268 | 0,672 | 0,844 | 2,24E-29 | 0 | Anp32b        |
| 3,14E-33 | -0,56428 | 0,329 | 0,59  | 3,88E-29 | 0 | Pgk1          |
| 4,57E-33 | -0,52083 | 0,226 | 0,499 | 5,66E-29 | 0 | Helq          |
| 6,2E-33  | -0,45033 | 0,107 | 0,358 | 7,68E-29 | 0 | Havcr1        |
| 6,26E-33 | 0,416546 | 0,996 | 0,971 | 7,75E-29 | 0 | Rpl37a        |
| 9,78E-33 | -0,49649 | 0,12  | 0,37  | 1,21E-28 | 0 | C130026I21Rik |
| 1,04E-32 | -0,50163 | 0,393 | 0,671 | 1,29E-28 | 0 | Polr1d        |

|          |          |       |       |            |          |
|----------|----------|-------|-------|------------|----------|
| 1,13E-32 | -0,54308 | 0,514 | 0,744 | 1,4E-28 0  | Ppp1ca   |
| 1,32E-32 | -0,36118 | 0,042 | 0,258 | 1,64E-28 0 | Neil1    |
| 1,43E-32 | 0,5285   | 0,365 | 0,135 | 1,77E-28 0 | S1pr1    |
| 2,9E-32  | -0,53754 | 0,419 | 0,673 | 3,59E-28 0 | Tcea1    |
| 4,54E-32 | -0,50476 | 0,086 | 0,32  | 5,62E-28 0 | Mcm3     |
| 6,21E-32 | -0,51241 | 0,643 | 0,838 | 7,69E-28 0 | Atp5b    |
| 6,47E-32 | -0,52052 | 0,517 | 0,743 | 8,01E-28 0 | Prdx1    |
| 8,79E-32 | -0,56584 | 0,672 | 0,845 | 1,09E-27 0 | Mzb1     |
| 8,92E-32 | 0,470511 | 0,925 | 0,819 | 1,1E-27 0  | D4Wsu53e |
| 8,98E-32 | -0,52884 | 0,588 | 0,783 | 1,11E-27 0 | Ube2d2a  |
| 9,74E-32 | -0,466   | 0,132 | 0,384 | 1,21E-27 0 | Bzw2     |
| 1,08E-31 | -0,43441 | 0,114 | 0,359 | 1,34E-27 0 | Smagp    |
| 1,32E-31 | -0,33793 | 0,028 | 0,23  | 1,63E-27 0 | Ada      |
| 1,84E-31 | -0,45028 | 0,319 | 0,594 | 2,28E-27 0 | Mtss1    |
| 2,23E-31 | 0,657459 | 0,849 | 0,722 | 2,76E-27 0 | Btla     |
| 2,36E-31 | 0,575981 | 0,542 | 0,305 | 2,92E-27 0 | Stk10    |
| 2,87E-31 | -0,5941  | 0,075 | 0,298 | 3,55E-27 0 | Cks2     |
| 3,27E-31 | -0,78932 | 0,122 | 0,355 | 4,04E-27 0 | Top2a    |
| 3,75E-31 | 0,483469 | 0,888 | 0,774 | 4,64E-27 0 | Ctss     |
| 5,51E-31 | -0,47749 | 0,894 | 0,934 | 6,82E-27 0 | Rbm3     |
| 7,26E-31 | 0,507251 | 0,88  | 0,748 | 8,99E-27 0 | Faim3    |
| 8,35E-31 | 0,463947 | 0,367 | 0,15  | 1,03E-26 0 | Ppcs     |
| 9,19E-31 | -0,52159 | 0,216 | 0,48  | 1,14E-26 0 | Anxa2    |
| 1,07E-30 | -0,41031 | 0,122 | 0,367 | 1,32E-26 0 | Hmgn3    |
| 1,82E-30 | 0,437867 | 0,399 | 0,168 | 2,26E-26 0 | Cdkn1b   |
| 1,86E-30 | -1,08387 | 0,484 | 0,682 | 2,3E-26 0  | Pcna     |
| 1,9E-30  | -0,33467 | 0,012 | 0,195 | 2,35E-26 0 | Gnb4     |
| 2,09E-30 | -0,4145  | 0,039 | 0,241 | 2,59E-26 0 | Gatm     |
| 2,41E-30 | -0,50666 | 0,271 | 0,535 | 2,98E-26 0 | Cmpk1    |
| 4,46E-30 | 0,680474 | 0,645 | 0,435 | 5,52E-26 0 | Vim      |
| 6,16E-30 | -0,34997 | 0,007 | 0,183 | 7,63E-26 0 | Gm2447   |
| 7,88E-30 | -0,51059 | 0,704 | 0,84  | 9,76E-26 0 | Atp5a1   |
| 8,11E-30 | 0,596471 | 0,529 | 0,304 | 1E-25 0    | Clic4    |
| 1,69E-29 | -0,64035 | 0,1   | 0,322 | 2,09E-25 0 | Mcm5     |
| 1,7E-29  | -0,40725 | 0,064 | 0,278 | 2,1E-25 0  | Cnst     |
| 5,91E-29 | -0,36529 | 0,042 | 0,241 | 7,32E-25 0 | Stxbp1   |
| 6,57E-29 | 0,380207 | 0,999 | 0,983 | 8,13E-25 0 | Rpl38    |
| 6,83E-29 | -0,51878 | 0,352 | 0,587 | 8,46E-25 0 | Rbbp7    |
| 7,44E-29 | -0,52075 | 0,396 | 0,653 | 9,21E-25 0 | Foxo1    |
| 7,69E-29 | 0,484036 | 0,412 | 0,189 | 9,52E-25 0 | Man1a    |
| 1,55E-28 | -0,45217 | 0,68  | 0,839 | 1,92E-24 0 | Clic1    |
| 1,58E-28 | 0,554691 | 0,6   | 0,377 | 1,95E-24 0 | Filip1l  |
| 2,17E-28 | -0,49767 | 0,599 | 0,796 | 2,68E-24 0 | Atp5g3   |
| 2,98E-28 | -0,4512  | 0,101 | 0,322 | 3,69E-24 0 | Dut      |
| 5,19E-28 | -0,44639 | 0,062 | 0,264 | 6,42E-24 0 | Cdca7    |
| 5,34E-28 | 0,34374  | 0,248 | 0,073 | 6,61E-24 0 | Fxyd5    |
| 6,24E-28 | 0,542901 | 0,548 | 0,325 | 7,73E-24 0 | Mylip    |
| 6,63E-28 | -0,50074 | 0,283 | 0,542 | 8,21E-24 0 | Psip1    |
| 6,91E-28 | -0,44424 | 0,217 | 0,463 | 8,56E-24 0 | Taf9     |
| 1E-27    | -0,28476 | 1     | 1     | 1,24E-23 0 | Actb     |

|          |          |       |       |          |   |               |
|----------|----------|-------|-------|----------|---|---------------|
| 1,17E-27 | 0,450942 | 0,388 | 0,172 | 1,45E-23 | 0 | Itpr1         |
| 1,86E-27 | -0,84595 | 0,094 | 0,3   | 2,3E-23  | 0 | 2810417H13Rik |
| 1,99E-27 | -0,50667 | 0,225 | 0,465 | 2,46E-23 | 0 | Slbp          |
| 2,3E-27  | -0,39525 | 0,048 | 0,241 | 2,85E-23 | 0 | Nmral1        |
| 3,64E-27 | -0,60882 | 0,457 | 0,671 | 4,51E-23 | 0 | Bach2         |
| 4,94E-27 | -0,56315 | 0,714 | 0,841 | 6,11E-23 | 0 | Hmgb1         |
| 7,87E-27 | -0,31424 | 0,065 | 0,268 | 9,74E-23 | 0 | Amz2          |
| 8,58E-27 | 0,382753 | 0,246 | 0,075 | 1,06E-22 | 0 | Ccr7          |
| 1,09E-26 | -0,55402 | 0,209 | 0,436 | 1,35E-22 | 0 | Pafah1b3      |
| 1,13E-26 | 0,264603 | 0,168 | 0,031 | 1,4E-22  | 0 | Rnf144a       |
| 1,45E-26 | -0,44278 | 0,104 | 0,314 | 1,8E-22  | 0 | Mcm2          |
| 2,49E-26 | 0,463417 | 0,601 | 0,405 | 3,08E-22 | 0 | Acap1         |
| 2,65E-26 | -0,45844 | 0,474 | 0,715 | 3,28E-22 | 0 | Pold4         |
| 2,92E-26 | -0,46536 | 0,413 | 0,643 | 3,61E-22 | 0 | Psmb7         |
| 4,4E-26  | -0,45235 | 0,23  | 0,476 | 5,45E-22 | 0 | Pnp           |
| 5,27E-26 | 0,364312 | 0,264 | 0,087 | 6,52E-22 | 0 | Ckap4         |
| 5,62E-26 | 0,438978 | 0,701 | 0,476 | 6,96E-22 | 0 | Samd9l        |
| 6,88E-26 | -0,43442 | 0,477 | 0,707 | 8,52E-22 | 0 | Cox6b1        |
| 8,01E-26 | -0,56334 | 0,612 | 0,773 | 9,91E-22 | 0 | Hnrnpab       |
| 8,09E-26 | -0,46089 | 0,065 | 0,256 | 1E-21    | 0 | Dhfr          |
| 8,36E-26 | -0,40889 | 0,043 | 0,223 | 1,04E-21 | 0 | Uhrf1         |
| 8,42E-26 | -0,3932  | 0,077 | 0,279 | 1,04E-21 | 0 | Cyp51         |
| 8,62E-26 | 0,369091 | 0,303 | 0,113 | 1,07E-21 | 0 | Il10rb        |
| 1,82E-25 | -0,44813 | 0,294 | 0,537 | 2,26E-21 | 0 | Rere          |
| 1,89E-25 | -0,51509 | 0,484 | 0,704 | 2,35E-21 | 0 | Ldha          |
| 2,29E-25 | 0,549998 | 0,623 | 0,407 | 2,84E-21 | 0 | Abca1         |
| 2,58E-25 | 0,310257 | 1     | 0,996 | 3,19E-21 | 0 | Ddx5          |
| 2,89E-25 | -0,41953 | 0,201 | 0,434 | 3,58E-21 | 0 | Polr2g        |
| 3,13E-25 | 0,487864 | 0,536 | 0,327 | 3,88E-21 | 0 | Ubl3          |
| 4,94E-25 | -0,3467  | 0,043 | 0,222 | 6,11E-21 | 0 | Efnb1         |
| 8,17E-25 | 0,416957 | 0,841 | 0,67  | 1,01E-20 | 0 | Ly6a          |
| 8,3E-25  | 0,366902 | 0,307 | 0,119 | 1,03E-20 | 0 | Abcg1         |
| 9,17E-25 | -0,51079 | 0,423 | 0,64  | 1,14E-20 | 0 | Scaf11        |
| 9,48E-25 | -0,44212 | 0,339 | 0,582 | 1,17E-20 | 0 | Ssbp3         |
| 1,15E-24 | -0,52192 | 0,123 | 0,326 | 1,42E-20 | 0 | Asf1b         |
| 1,17E-24 | -0,35678 | 0,106 | 0,314 | 1,44E-20 | 0 | Fut8          |
| 1,61E-24 | -0,42318 | 0,519 | 0,737 | 1,99E-20 | 0 | Cox6c         |
| 1,69E-24 | -0,38571 | 0,978 | 0,983 | 2,09E-20 | 0 | Hnrnpa2b1     |
| 2,14E-24 | 0,374506 | 0,42  | 0,209 | 2,65E-20 | 0 | Esyt1         |
| 2,26E-24 | 0,348271 | 0,248 | 0,083 | 2,79E-20 | 0 | Il27ra        |
| 4,45E-24 | -0,44035 | 0,287 | 0,523 | 5,51E-20 | 0 | Anp32e        |
| 4,66E-24 | -0,45116 | 0,238 | 0,464 | 5,76E-20 | 0 | Tpi1          |
| 4,78E-24 | -0,35086 | 0,054 | 0,232 | 5,92E-20 | 0 | Cpne5         |
| 4,84E-24 | -0,30401 | 0,062 | 0,247 | 5,99E-20 | 0 | Parp8         |
| 4,91E-24 | 0,469087 | 0,41  | 0,21  | 6,08E-20 | 0 | Chd2          |
| 5,28E-24 | -0,38757 | 0,116 | 0,324 | 6,53E-20 | 0 | Psat1         |
| 5,48E-24 | -0,36045 | 0,119 | 0,33  | 6,79E-20 | 0 | Dtx1          |
| 5,66E-24 | -0,4572  | 0,367 | 0,586 | 7,01E-20 | 0 | Erh           |
| 5,71E-24 | -0,40168 | 0,696 | 0,84  | 7,07E-20 | 0 | Srsf3         |
| 6,57E-24 | -0,40956 | 0,204 | 0,434 | 8,14E-20 | 0 | Atad1         |

|          |          |       |       |          |   |               |
|----------|----------|-------|-------|----------|---|---------------|
| 7E-24    | -0,40528 | 0,965 | 0,977 | 8,67E-20 | 0 | Hspa8         |
| 7,1E-24  | 0,384832 | 0,442 | 0,23  | 8,79E-20 | 0 | Gmfg          |
| 8,08E-24 | 0,301988 | 0,245 | 0,08  | 1E-19    | 0 | Gpr174        |
| 1,03E-23 | -0,43233 | 0,204 | 0,417 | 1,27E-19 | 0 | Bcl7a         |
| 1,08E-23 | 0,410211 | 0,591 | 0,378 | 1,34E-19 | 0 | Psap          |
| 1,09E-23 | -0,42325 | 0,67  | 0,812 | 1,35E-19 | 0 | Capzb         |
| 1,47E-23 | -0,45226 | 0,038 | 0,201 | 1,82E-19 | 0 | Cenpe         |
| 1,97E-23 | 0,359579 | 0,328 | 0,14  | 2,43E-19 | 0 | Phf1          |
| 2,02E-23 | -0,4145  | 0,441 | 0,672 | 2,5E-19  | 0 | Usp7          |
| 2,05E-23 | 0,405758 | 0,509 | 0,291 | 2,54E-19 | 0 | Mllt6         |
| 2,15E-23 | -0,38092 | 0,084 | 0,272 | 2,66E-19 | 0 | H2afx         |
| 3E-23    | -0,45595 | 0,981 | 0,981 | 3,72E-19 | 0 | Laptm5        |
| 3,1E-23  | -0,36357 | 0,193 | 0,417 | 3,84E-19 | 0 | Fas           |
| 3,17E-23 | -0,45893 | 0,451 | 0,654 | 3,92E-19 | 0 | Mdh1          |
| 3,48E-23 | 0,449706 | 0,907 | 0,823 | 4,3E-19  | 0 | Eif4a2        |
| 3,55E-23 | -0,37017 | 0,228 | 0,457 | 4,4E-19  | 0 | Ube2n         |
| 4,67E-23 | -0,43487 | 0,939 | 0,968 | 5,78E-19 | 0 | Pfn1          |
| 5,05E-23 | -0,4254  | 0,374 | 0,605 | 6,25E-19 | 0 | Syvn1         |
| 5,07E-23 | 0,327274 | 0,283 | 0,108 | 6,28E-19 | 0 | Cd97          |
| 6,09E-23 | 0,28821  | 0,242 | 0,083 | 7,54E-19 | 0 | Ier2          |
| 6,75E-23 | -0,31662 | 0,046 | 0,215 | 8,36E-19 | 0 | Smco4         |
| 7,35E-23 | -0,46257 | 0,113 | 0,303 | 9,1E-19  | 0 | Mcm4          |
| 7,6E-23  | -0,41166 | 0,577 | 0,771 | 9,41E-19 | 0 | Tnfaip8       |
| 7,76E-23 | -0,37474 | 0,357 | 0,597 | 9,6E-19  | 0 | Shfm1         |
| 1,05E-22 | -0,37998 | 0,093 | 0,281 | 1,3E-18  | 0 | Ezh2          |
| 1,15E-22 | -0,39059 | 0,175 | 0,389 | 1,42E-18 | 0 | Whsc1         |
| 1,18E-22 | -0,25413 | 0,004 | 0,138 | 1,46E-18 | 0 | Ncapg         |
| 1,7E-22  | -0,38004 | 0,155 | 0,365 | 2,1E-18  | 0 | Eif2ak3       |
| 1,76E-22 | -0,40368 | 0,213 | 0,436 | 2,18E-18 | 0 | Atp8a1        |
| 1,78E-22 | -0,31309 | 0,035 | 0,193 | 2,2E-18  | 0 | Dtl           |
| 1,89E-22 | -0,34973 | 0,101 | 0,294 | 2,34E-18 | 0 | Ildr1         |
| 1,91E-22 | -0,35268 | 0,358 | 0,6   | 2,37E-18 | 0 | Cct5          |
| 1,92E-22 | -0,30705 | 0,091 | 0,283 | 2,38E-18 | 0 | 4833439L19Rik |
| 2,55E-22 | 0,302995 | 0,249 | 0,089 | 3,16E-18 | 0 | Setd1b        |
| 2,57E-22 | 0,35138  | 0,307 | 0,129 | 3,18E-18 | 0 | Sema4b        |
| 2,61E-22 | 0,282616 | 0,197 | 0,057 | 3,23E-18 | 0 | Peg13         |
| 2,89E-22 | -0,37037 | 0,403 | 0,628 | 3,57E-18 | 0 | Eif3k         |
| 2,95E-22 | 0,396418 | 0,261 | 0,097 | 3,65E-18 | 0 | Kbtbd11       |
| 3,16E-22 | -0,37473 | 0,242 | 0,466 | 3,91E-18 | 0 | Vdac3         |
| 4,03E-22 | 0,525927 | 0,626 | 0,463 | 4,99E-18 | 0 | Flna          |
| 4,3E-22  | -0,69719 | 0,133 | 0,322 | 5,32E-18 | 0 | Nrgn          |
| 4,64E-22 | -0,39046 | 0,387 | 0,611 | 5,75E-18 | 0 | Lpxn          |
| 4,78E-22 | -0,33049 | 0,13  | 0,33  | 5,92E-18 | 0 | Nudt21        |
| 5,36E-22 | -0,38842 | 0,299 | 0,524 | 6,63E-18 | 0 | Azin1         |
| 6,45E-22 | 0,3172   | 0,223 | 0,073 | 7,99E-18 | 0 | Plbd1         |
| 7,2E-22  | 0,286505 | 0,148 | 0,031 | 8,91E-18 | 0 | Fam101b       |
| 1,02E-21 | -0,28374 | 0,08  | 0,262 | 1,26E-17 | 0 | Gng12         |
| 1,03E-21 | -0,41549 | 0,214 | 0,432 | 1,27E-17 | 0 | Snrpd1        |
| 1,04E-21 | 0,449471 | 0,372 | 0,186 | 1,29E-17 | 0 | Pecam1        |
| 1,04E-21 | -0,38535 | 0,287 | 0,512 | 1,29E-17 | 0 | Phf6          |

|          |          |       |       |          |   |               |
|----------|----------|-------|-------|----------|---|---------------|
| 1,09E-21 | 0,262608 | 1     | 0,999 | 1,35E-17 | 0 | Rpl13a        |
| 1,16E-21 | -0,41654 | 0,706 | 0,842 | 1,44E-17 | 0 | Spib          |
| 1,26E-21 | 0,260622 | 0,206 | 0,063 | 1,56E-17 | 0 | Gm15987       |
| 1,44E-21 | 0,459149 | 0,493 | 0,307 | 1,78E-17 | 0 | Ppp3ca        |
| 1,5E-21  | -0,38419 | 0,37  | 0,59  | 1,86E-17 | 0 | Cox5b         |
| 1,58E-21 | -0,42351 | 0,362 | 0,584 | 1,95E-17 | 0 | Pgam1         |
| 1,62E-21 | -0,38619 | 0,3   | 0,528 | 2E-17    | 0 | Cerk          |
| 1,86E-21 | 0,311331 | 0,268 | 0,105 | 2,3E-17  | 0 | Pdcd4         |
| 1,87E-21 | -0,3469  | 0,025 | 0,169 | 2,32E-17 | 0 | Cdk1          |
| 2,1E-21  | -0,32468 | 0,174 | 0,387 | 2,6E-17  | 0 | Eif1ax        |
| 2,18E-21 | -0,30779 | 0,019 | 0,159 | 2,7E-17  | 0 | Cks1b         |
| 2,19E-21 | -0,38955 | 0,394 | 0,634 | 2,72E-17 | 0 | Atp5j         |
| 2,76E-21 | -0,35588 | 0,217 | 0,433 | 3,42E-17 | 0 | Pkig          |
| 3,25E-21 | -0,40416 | 0,332 | 0,537 | 4,02E-17 | 0 | Eif4a1        |
| 4,5E-21  | -0,35709 | 0,219 | 0,435 | 5,57E-17 | 0 | Arl5a         |
| 6,56E-21 | 0,365463 | 0,328 | 0,15  | 8,12E-17 | 0 | Lgals9        |
| 7,23E-21 | -0,35461 | 0,241 | 0,452 | 8,95E-17 | 0 | Sdhb          |
| 8,84E-21 | -0,48506 | 0,514 | 0,705 | 1,09E-16 | 0 | Crip1         |
| 1,33E-20 | -0,33804 | 0,33  | 0,555 | 1,65E-16 | 0 | Gnb1          |
| 1,4E-20  | -0,39341 | 0,204 | 0,409 | 1,74E-16 | 0 | H2afv         |
| 1,5E-20  | -0,35327 | 0,117 | 0,304 | 1,85E-16 | 0 | Slamf7        |
| 1,5E-20  | 0,340191 | 0,239 | 0,09  | 1,86E-16 | 0 | Pxdc1         |
| 1,74E-20 | -0,39352 | 0,342 | 0,559 | 2,15E-16 | 0 | Psma2         |
| 1,94E-20 | -0,37618 | 0,204 | 0,408 | 2,4E-16  | 0 | Bid           |
| 2,3E-20  | 0,405454 | 0,781 | 0,685 | 2,84E-16 | 0 | Gm9846        |
| 2,47E-20 | -0,36938 | 0,441 | 0,648 | 3,06E-16 | 0 | Akr1a1        |
| 2,76E-20 | -0,34428 | 0,186 | 0,389 | 3,41E-16 | 0 | Naa40         |
| 3,47E-20 | 0,362354 | 0,343 | 0,168 | 4,29E-16 | 0 | Clec2g        |
| 3,47E-20 | -0,35716 | 0,345 | 0,568 | 4,3E-16  | 0 | Arpc3         |
| 4,43E-20 | -0,36742 | 0,301 | 0,512 | 5,49E-16 | 0 | Cdk2ap2       |
| 4,48E-20 | -0,36472 | 0,458 | 0,644 | 5,55E-16 | 0 | Oaz1          |
| 4,63E-20 | -0,35065 | 0,329 | 0,546 | 5,73E-16 | 0 | Cox5a         |
| 5,28E-20 | -0,34091 | 0,187 | 0,387 | 6,53E-16 | 0 | Cbx5          |
| 5,92E-20 | 0,383306 | 0,378 | 0,193 | 7,33E-16 | 0 | Emp3          |
| 6,13E-20 | -0,43438 | 0,478 | 0,673 | 7,59E-16 | 0 | Gna13         |
| 8,16E-20 | 0,27392  | 0,135 | 0,028 | 1,01E-15 | 0 | Gpr82         |
| 9,08E-20 | -0,40671 | 0,193 | 0,388 | 1,12E-15 | 0 | Dnmt1         |
| 9,82E-20 | -0,27988 | 0,068 | 0,233 | 1,22E-15 | 0 | Tipin         |
| 1,1E-19  | -0,35655 | 0,083 | 0,248 | 1,36E-15 | 0 | Pla2g12a      |
| 1,14E-19 | 0,386655 | 0,358 | 0,182 | 1,41E-15 | 0 | Mgat4a        |
| 1,2E-19  | -0,30683 | 0,091 | 0,263 | 1,49E-15 | 0 | Lst1          |
| 1,3E-19  | 0,428144 | 0,767 | 0,663 | 1,6E-15  | 0 | Smg1          |
| 1,33E-19 | -0,30376 | 0,997 | 0,998 | 1,64E-15 | 0 | Rplp0         |
| 1,83E-19 | -0,30954 | 0,306 | 0,531 | 2,26E-15 | 0 | Psma1         |
| 1,91E-19 | -0,30973 | 0,054 | 0,205 | 2,37E-15 | 0 | Hells         |
| 1,99E-19 | 0,349443 | 0,339 | 0,166 | 2,46E-15 | 0 | Neat1         |
| 2,32E-19 | -0,33703 | 0,343 | 0,571 | 2,87E-15 | 0 | 1700021K19Rik |
| 2,43E-19 | 0,447548 | 0,5   | 0,326 | 3,01E-15 | 0 | Chd7          |
| 3,2E-19  | -0,25543 | 0,052 | 0,205 | 3,96E-15 | 0 | 2510009E07Rik |
| 3,65E-19 | 0,415655 | 0,709 | 0,563 | 4,52E-15 | 0 | Gimap1        |



|          |          |       |       |          |   |               |
|----------|----------|-------|-------|----------|---|---------------|
| 3,86E-19 | -0,34227 | 0,219 | 0,417 | 4,78E-15 | 0 | Rps27l        |
| 4,83E-19 | -0,28895 | 0,091 | 0,259 | 5,98E-15 | 0 | Msh6          |
| 5,41E-19 | 0,305204 | 0,362 | 0,181 | 6,69E-15 | 0 | Notch2        |
| 5,43E-19 | -0,41654 | 0,209 | 0,398 | 6,72E-15 | 0 | Lck           |
| 5,98E-19 | 0,343251 | 0,962 | 0,921 | 7,4E-15  | 0 | Rpl36         |
| 6,51E-19 | -0,34376 | 0,417 | 0,626 | 8,06E-15 | 0 | Snrpe         |
| 7,06E-19 | -0,32568 | 0,193 | 0,393 | 8,74E-15 | 0 | Cpsf2         |
| 7,7E-19  | -0,38649 | 0,601 | 0,752 | 9,54E-15 | 0 | Sumo2         |
| 8,33E-19 | -0,29263 | 0,135 | 0,316 | 1,03E-14 | 0 | Plxnb2        |
| 9,11E-19 | -0,33978 | 0,812 | 0,901 | 1,13E-14 | 0 | Arpc1b        |
| 1,14E-18 | 0,418254 | 0,709 | 0,576 | 1,41E-14 | 0 | Snx2          |
| 1,28E-18 | 0,442985 | 0,436 | 0,263 | 1,59E-14 | 0 | Rasgrp2       |
| 1,45E-18 | -0,38084 | 0,297 | 0,498 | 1,79E-14 | 0 | Mapre2        |
| 1,47E-18 | -0,38955 | 0,3   | 0,506 | 1,82E-14 | 0 | Ube2j1        |
| 1,49E-18 | -0,31113 | 0,167 | 0,36  | 1,84E-14 | 0 | Eif2a         |
| 1,55E-18 | -0,29057 | 0,099 | 0,267 | 1,92E-14 | 0 | Abr           |
| 1,59E-18 | -0,33151 | 0,106 | 0,277 | 1,97E-14 | 0 | Mad2l1        |
| 1,84E-18 | 0,268836 | 0,191 | 0,064 | 2,28E-14 | 0 | Rhbdf1        |
| 2,03E-18 | 0,284145 | 0,264 | 0,111 | 2,52E-14 | 0 | Bhlhe41       |
| 2,04E-18 | -0,38183 | 0,472 | 0,667 | 2,52E-14 | 0 | Hnrnpa0       |
| 2,12E-18 | -0,27013 | 1     | 0,999 | 2,62E-14 | 0 | Rpl41         |
| 2,19E-18 | -0,36523 | 0,167 | 0,351 | 2,72E-14 | 0 | Tgfbr1        |
| 2,21E-18 | -0,35666 | 0,532 | 0,732 | 2,73E-14 | 0 | Eif3h         |
| 2,38E-18 | -0,26441 | 0,071 | 0,226 | 2,95E-14 | 0 | Lmnb1         |
| 2,38E-18 | -0,34797 | 0,206 | 0,395 | 2,95E-14 | 0 | Topbp1        |
| 2,56E-18 | -0,33184 | 0,142 | 0,323 | 3,17E-14 | 0 | Emid1         |
| 2,81E-18 | -0,36956 | 0,232 | 0,424 | 3,48E-14 | 0 | Sh3bgrl       |
| 2,82E-18 | -0,39134 | 0,567 | 0,726 | 3,49E-14 | 0 | Cox6a1        |
| 2,86E-18 | -0,36882 | 0,02  | 0,143 | 3,54E-14 | 0 | Ccna2         |
| 2,89E-18 | 0,383561 | 0,251 | 0,104 | 3,58E-14 | 0 | A630033H20Rik |
| 2,91E-18 | -0,25276 | 0,055 | 0,202 | 3,6E-14  | 0 | Itgb3         |
| 2,96E-18 | -0,39432 | 0,094 | 0,254 | 3,66E-14 | 0 | Lig1          |
| 3,12E-18 | 0,545361 | 0,835 | 0,712 | 3,87E-14 | 0 | Il2rg         |
| 3,21E-18 | -0,36786 | 0,461 | 0,671 | 3,98E-14 | 0 | Lrmp          |
| 3,39E-18 | 0,509094 | 0,287 | 0,134 | 4,2E-14  | 0 | Ms4a4c        |
| 4,3E-18  | -0,34836 | 0,355 | 0,559 | 5,32E-14 | 0 | Sec61b        |
| 4,86E-18 | -0,29487 | 0,026 | 0,153 | 6,02E-14 | 0 | Cdca3         |
| 5,09E-18 | -0,31958 | 0,294 | 0,491 | 6,3E-14  | 0 | Lsm4          |
| 5,77E-18 | -0,33211 | 0,301 | 0,507 | 7,14E-14 | 0 | Pomp          |
| 6,26E-18 | -0,28573 | 0,125 | 0,3   | 7,75E-14 | 0 | Mrps7         |
| 6,26E-18 | 0,398389 | 0,82  | 0,708 | 7,76E-14 | 0 | Hmha1         |
| 6,97E-18 | 0,356954 | 0,252 | 0,108 | 8,63E-14 | 0 | Satb1         |
| 9,54E-18 | 0,467857 | 0,691 | 0,567 | 1,18E-13 | 0 | Mll5          |
| 1,39E-17 | -0,33642 | 0,454 | 0,653 | 1,72E-13 | 0 | Hn1           |
| 1,72E-17 | 0,365889 | 0,407 | 0,237 | 2,13E-13 | 0 | Gimap7        |
| 1,92E-17 | -0,26295 | 0,072 | 0,223 | 2,37E-13 | 0 | Rnaseh2b      |
| 1,93E-17 | -0,31531 | 0,252 | 0,447 | 2,4E-13  | 0 | Tkt           |
| 2E-17    | -0,31679 | 0,314 | 0,521 | 2,47E-13 | 0 | Csnk2b        |
| 2,07E-17 | -0,32613 | 0,354 | 0,561 | 2,57E-13 | 0 | Minos1        |
| 2,08E-17 | -0,25145 | 0,042 | 0,176 | 2,57E-13 | 0 | Mthfd2        |

|          |          |       |       |          |   |               |
|----------|----------|-------|-------|----------|---|---------------|
| 2,13E-17 | 0,255871 | 0,21  | 0,078 | 2,64E-13 | 0 | Ski           |
| 2,5E-17  | 0,318141 | 0,229 | 0,092 | 3,1E-13  | 0 | Arap2         |
| 3,68E-17 | -0,29964 | 0,057 | 0,196 | 4,55E-13 | 0 | Idi1          |
| 4,37E-17 | -0,41449 | 0,67  | 0,792 | 5,41E-13 | 0 | Bptf          |
| 4,5E-17  | -0,31724 | 0,228 | 0,425 | 5,57E-13 | 0 | Smarca4       |
| 4,55E-17 | 0,342519 | 0,445 | 0,275 | 5,64E-13 | 0 | Rabac1        |
| 4,58E-17 | 0,355952 | 0,839 | 0,728 | 5,67E-13 | 0 | Prkcb         |
| 4,73E-17 | -0,33166 | 0,546 | 0,722 | 5,86E-13 | 0 | Epn1          |
| 4,8E-17  | -0,31797 | 0,416 | 0,614 | 5,94E-13 | 0 | Tomm20        |
| 5,02E-17 | -0,27044 | 0,245 | 0,446 | 6,22E-13 | 0 | Ktn1          |
| 5,09E-17 | -0,27004 | 0,093 | 0,249 | 6,3E-13  | 0 | Dusp10        |
| 5,31E-17 | -0,30756 | 0,23  | 0,421 | 6,58E-13 | 0 | Mrpl18        |
| 5,4E-17  | 0,307695 | 0,268 | 0,123 | 6,69E-13 | 0 | Gm2a          |
| 6,36E-17 | 0,422244 | 0,73  | 0,589 | 7,87E-13 | 0 | Lbh           |
| 6,78E-17 | -0,31658 | 0,228 | 0,417 | 8,4E-13  | 0 | Psm5          |
| 6,86E-17 | -0,29366 | 0,091 | 0,246 | 8,49E-13 | 0 | Btl2          |
| 6,9E-17  | -0,48075 | 0,107 | 0,26  | 8,54E-13 | 0 | Eif5a2        |
| 6,91E-17 | 0,323823 | 0,309 | 0,155 | 8,56E-13 | 0 | Tcp11l2       |
| 7,15E-17 | -0,34259 | 0,222 | 0,409 | 8,86E-13 | 0 | Trim59        |
| 7,26E-17 | -0,30072 | 0,361 | 0,572 | 8,98E-13 | 0 | Atp5f1        |
| 7,39E-17 | -0,39167 | 0,4   | 0,583 | 9,15E-13 | 0 | Cycc          |
| 7,81E-17 | -0,26554 | 0,151 | 0,324 | 9,67E-13 | 0 | Uchl3         |
| 1,1E-16  | -0,30668 | 0,291 | 0,486 | 1,36E-12 | 0 | Rbm38         |
| 1,12E-16 | 0,408645 | 0,533 | 0,366 | 1,38E-12 | 0 | Ncf1          |
| 1,17E-16 | -0,32879 | 0,396 | 0,589 | 1,45E-12 | 0 | Nedd8         |
| 1,47E-16 | -0,33621 | 0,359 | 0,55  | 1,83E-12 | 0 | Lbr           |
| 1,81E-16 | -0,28376 | 0,562 | 0,749 | 2,24E-12 | 0 | Atp5c1        |
| 1,91E-16 | -0,32408 | 0,583 | 0,755 | 2,36E-12 | 0 | Hnrnpk        |
| 2,14E-16 | -0,4303  | 0,22  | 0,391 | 2,65E-12 | 0 | Mcm7          |
| 2,22E-16 | -0,47784 | 0,103 | 0,253 | 2,75E-12 | 0 | Rrm2          |
| 2,25E-16 | -0,28989 | 0,174 | 0,35  | 2,79E-12 | 0 | Arpc1a        |
| 2,3E-16  | 0,349187 | 0,196 | 0,074 | 2,85E-12 | 0 | Osbpl5        |
| 2,36E-16 | -0,36005 | 0,391 | 0,583 | 2,92E-12 | 0 | Eif2s2        |
| 2,37E-16 | 0,252076 | 0,155 | 0,048 | 2,94E-12 | 0 | Hopx          |
| 2,49E-16 | -0,3708  | 0,768 | 0,84  | 3,08E-12 | 0 | Hnrnpa3       |
| 2,62E-16 | -0,30968 | 0,268 | 0,461 | 3,24E-12 | 0 | Cxcr4         |
| 2,97E-16 | -0,35755 | 0,375 | 0,569 | 3,68E-12 | 0 | Pitpnc1       |
| 3,25E-16 | 0,355061 | 0,399 | 0,236 | 4,03E-12 | 0 | Tmem173       |
| 3,37E-16 | -0,33631 | 0,1   | 0,252 | 4,18E-12 | 0 | Prim1         |
| 3,42E-16 | 0,328138 | 0,503 | 0,328 | 4,23E-12 | 0 | 2310034O05Rik |
| 3,82E-16 | -0,35853 | 0,293 | 0,481 | 4,73E-12 | 0 | Ndufc2        |
| 4,03E-16 | -0,30285 | 0,446 | 0,638 | 4,98E-12 | 0 | Hnrnpd        |
| 4,44E-16 | 0,42906  | 0,872 | 0,803 | 5,5E-12  | 0 | Lax1          |
| 4,85E-16 | -0,2783  | 0,029 | 0,146 | 6,01E-12 | 0 | Cdca8         |
| 5,25E-16 | -0,28681 | 0,232 | 0,417 | 6,5E-12  | 0 | Ndufs2        |
| 5,7E-16  | 0,348473 | 0,528 | 0,358 | 7,06E-12 | 0 | S100a11       |
| 6,16E-16 | -0,30995 | 0,641 | 0,801 | 7,63E-12 | 0 | Serf2         |
| 6,35E-16 | -0,31694 | 0,393 | 0,578 | 7,86E-12 | 0 | Snrpb         |
| 6,51E-16 | 0,252658 | 0,142 | 0,041 | 8,06E-12 | 0 | Mfhas1        |
| 6,55E-16 | -0,36643 | 0,328 | 0,509 | 8,11E-12 | 0 | Akt1          |

|          |          |       |       |          |   |          |
|----------|----------|-------|-------|----------|---|----------|
| 6,71E-16 | 0,251519 | 0,994 | 0,987 | 8,31E-12 | 0 | Rps14    |
| 6,87E-16 | -0,26732 | 0,168 | 0,341 | 8,5E-12  | 0 | Ahcy     |
| 6,9E-16  | -0,30286 | 0,217 | 0,398 | 8,54E-12 | 0 | Dynlt3   |
| 7,69E-16 | -0,27468 | 0,135 | 0,296 | 9,52E-12 | 0 | Ranbp1   |
| 9,69E-16 | -0,30067 | 0,294 | 0,481 | 1,2E-11  | 0 | Sfpi1    |
| 9,94E-16 | -0,30302 | 0,112 | 0,264 | 1,23E-11 | 0 | Osbpl3   |
| 1,13E-15 | -0,28974 | 0,317 | 0,513 | 1,4E-11  | 0 | Ube2k    |
| 1,19E-15 | -0,28275 | 0,307 | 0,502 | 1,47E-11 | 0 | Dynlrb1  |
| 1,22E-15 | -0,31397 | 0,37  | 0,57  | 1,51E-11 | 0 | Hprt     |
| 1,35E-15 | -0,27308 | 0,28  | 0,481 | 1,67E-11 | 0 | Abracl   |
| 1,36E-15 | -0,28324 | 0,11  | 0,263 | 1,69E-11 | 0 | Rfc3     |
| 1,58E-15 | 0,375878 | 0,81  | 0,724 | 1,96E-11 | 0 | Hvcn1    |
| 1,66E-15 | -0,34487 | 0,565 | 0,733 | 2,05E-11 | 0 | Pcbp1    |
| 1,8E-15  | -0,30985 | 0,433 | 0,629 | 2,23E-11 | 0 | Clta     |
| 1,82E-15 | -0,28247 | 0,91  | 0,942 | 2,25E-11 | 0 | Psmb8    |
| 1,86E-15 | 0,405668 | 0,519 | 0,364 | 2,3E-11  | 0 | Mll3     |
| 1,9E-15  | -0,35788 | 0,72  | 0,826 | 2,35E-11 | 0 | Ccdc50   |
| 1,95E-15 | 0,265374 | 0,242 | 0,107 | 2,42E-11 | 0 | Ddx58    |
| 1,96E-15 | -0,2763  | 0,139 | 0,301 | 2,43E-11 | 0 | Nasp     |
| 2,11E-15 | -0,30788 | 0,151 | 0,311 | 2,62E-11 | 0 | Hat1     |
| 2,14E-15 | 0,30946  | 0,375 | 0,21  | 2,65E-11 | 0 | Fgd2     |
| 2,18E-15 | -0,30143 | 0,486 | 0,688 | 2,69E-11 | 0 | Map4k1   |
| 2,19E-15 | -0,33074 | 0,807 | 0,881 | 2,71E-11 | 0 | Arpc4    |
| 2,24E-15 | 0,276589 | 0,307 | 0,158 | 2,77E-11 | 0 | Tle3     |
| 2,25E-15 | -0,31409 | 0,13  | 0,285 | 2,78E-11 | 0 | Ncapd2   |
| 2,43E-15 | -0,28142 | 0,057 | 0,185 | 3,01E-11 | 0 | Racgap1  |
| 2,54E-15 | -0,35025 | 0,459 | 0,638 | 3,15E-11 | 0 | Cyfip2   |
| 3,04E-15 | -0,32069 | 0,542 | 0,707 | 3,76E-11 | 0 | Cox4i1   |
| 3,23E-15 | -0,29999 | 0,325 | 0,518 | 4E-11    | 0 | Hipk3    |
| 3,94E-15 | -0,41512 | 0,057 | 0,182 | 4,88E-11 | 0 | Ccnb2    |
| 4,69E-15 | -0,28801 | 0,254 | 0,435 | 5,81E-11 | 0 | Usmg5    |
| 4,7E-15  | -0,31463 | 0,525 | 0,709 | 5,82E-11 | 0 | Ikzf1    |
| 5,34E-15 | -0,36762 | 0,187 | 0,356 | 6,61E-11 | 0 | Lacc1    |
| 5,48E-15 | -0,27971 | 0,233 | 0,41  | 6,79E-11 | 0 | Trim35   |
| 5,69E-15 | -0,41779 | 0,384 | 0,555 | 7,04E-11 | 0 | Wdr92    |
| 6,07E-15 | -0,36352 | 0,417 | 0,604 | 7,51E-11 | 0 | Cs       |
| 6,07E-15 | -0,33943 | 0,401 | 0,591 | 7,52E-11 | 0 | Tceb2    |
| 6,31E-15 | 0,372487 | 0,455 | 0,3   | 7,81E-11 | 0 | Ankrd44  |
| 6,75E-15 | -0,32789 | 0,287 | 0,46  | 8,35E-11 | 0 | Aldh2    |
| 6,96E-15 | -0,33684 | 0,29  | 0,472 | 8,62E-11 | 0 | Edem1    |
| 7,09E-15 | -0,31628 | 0,393 | 0,58  | 8,78E-11 | 0 | Lsm14a   |
| 8,49E-15 | -0,27807 | 0,232 | 0,413 | 1,05E-10 | 0 | Dars     |
| 8,64E-15 | -0,29418 | 0,036 | 0,149 | 1,07E-10 | 0 | Clspn    |
| 8,85E-15 | -0,29205 | 0,68  | 0,832 | 1,1E-10  | 0 | Tma7     |
| 9,4E-15  | -0,32555 | 0,252 | 0,428 | 1,16E-10 | 0 | Rraga    |
| 9,56E-15 | -0,25069 | 0,341 | 0,549 | 1,18E-10 | 0 | Cbfb     |
| 1,03E-14 | -0,26507 | 0,084 | 0,222 | 1,28E-10 | 0 | Fen1     |
| 1,31E-14 | -0,34032 | 0,662 | 0,785 | 1,63E-10 | 0 | Dynll1   |
| 1,4E-14  | -0,31788 | 0,948 | 0,965 | 1,73E-10 | 0 | Hsp90ab1 |
| 1,45E-14 | -0,29132 | 0,362 | 0,542 | 1,8E-10  | 0 | Rbbp4    |

|          |          |       |       |          |   |               |
|----------|----------|-------|-------|----------|---|---------------|
| 1,54E-14 | -0,27378 | 0,243 | 0,423 | 1,91E-10 | 0 | Rfc2          |
| 1,69E-14 | -0,31554 | 0,5   | 0,681 | 2,09E-10 | 0 | Cct2          |
| 1,71E-14 | -0,31294 | 0,438 | 0,61  | 2,12E-10 | 0 | Psmb4         |
| 1,75E-14 | -0,29303 | 0,254 | 0,421 | 2,16E-10 | 0 | Ube2h         |
| 1,76E-14 | -0,26092 | 0,307 | 0,487 | 2,18E-10 | 0 | Tcp1          |
| 1,91E-14 | 0,418441 | 0,593 | 0,458 | 2,37E-10 | 0 | Ralgps2       |
| 1,95E-14 | -0,32559 | 0,449 | 0,619 | 2,41E-10 | 0 | Vcp           |
| 2,02E-14 | -0,27162 | 0,145 | 0,3   | 2,5E-10  | 0 | Aars          |
| 2,06E-14 | -0,38085 | 0,809 | 0,881 | 2,55E-10 | 0 | Eif5a         |
| 2,4E-14  | 0,316376 | 0,236 | 0,107 | 2,97E-10 | 0 | Cd38          |
| 2,54E-14 | -0,26859 | 0,051 | 0,17  | 3,14E-10 | 0 | Tcf19         |
| 2,71E-14 | -0,30601 | 0,367 | 0,548 | 3,36E-10 | 0 | Hspa4         |
| 2,88E-14 | -0,27058 | 0,978 | 0,995 | 3,57E-10 | 0 | Eif1          |
| 2,94E-14 | 0,377037 | 0,754 | 0,638 | 3,65E-10 | 0 | Pisd-ps1      |
| 3,19E-14 | -0,28374 | 0,274 | 0,447 | 3,95E-10 | 0 | eGFP          |
| 3,37E-14 | -0,261   | 0,293 | 0,476 | 4,18E-10 | 0 | Slc25a4       |
| 3,4E-14  | -0,31068 | 0,242 | 0,413 | 4,21E-10 | 0 | Itgb1         |
| 3,87E-14 | -0,3011  | 0,641 | 0,781 | 4,79E-10 | 0 | Sfpq          |
| 3,92E-14 | 0,325599 | 0,499 | 0,338 | 4,85E-10 | 0 | Trim34a       |
| 4,31E-14 | 0,348064 | 0,352 | 0,208 | 5,34E-10 | 0 | Smarca2       |
| 4,43E-14 | -0,40525 | 0,816 | 0,884 | 5,49E-10 | 0 | Cnn2          |
| 4,66E-14 | -0,27909 | 0,291 | 0,461 | 5,76E-10 | 0 | Ap2s1         |
| 5,11E-14 | -0,26341 | 0,78  | 0,883 | 6,33E-10 | 0 | Gdi2          |
| 5,16E-14 | 0,339382 | 0,404 | 0,259 | 6,39E-10 | 0 | Malt1         |
| 5,59E-14 | -0,26461 | 0,23  | 0,406 | 6,92E-10 | 0 | Lsm6          |
| 5,86E-14 | -0,25562 | 0,033 | 0,14  | 7,25E-10 | 0 | Kif23         |
| 8,49E-14 | 0,353242 | 0,742 | 0,649 | 1,05E-09 | 0 | Srrm2         |
| 8,95E-14 | -0,27424 | 0,229 | 0,397 | 1,11E-09 | 0 | Fundc2        |
| 9,24E-14 | -0,25166 | 0,175 | 0,332 | 1,14E-09 | 0 | Mrpl33        |
| 9,62E-14 | -0,28215 | 0,222 | 0,388 | 1,19E-09 | 0 | Stap1         |
| 1,09E-13 | -0,29919 | 0,409 | 0,575 | 1,34E-09 | 0 | Eif4h         |
| 1,23E-13 | -0,25115 | 0,132 | 0,275 | 1,53E-09 | 0 | Dennd3        |
| 1,25E-13 | 0,289018 | 0,622 | 0,461 | 1,55E-09 | 0 | Pyhin1        |
| 1,28E-13 | -0,27736 | 0,154 | 0,306 | 1,59E-09 | 0 | 2700094K13Rik |
| 1,64E-13 | -0,25049 | 0,068 | 0,19  | 2,03E-09 | 0 | Birc5         |
| 1,65E-13 | -0,25995 | 0,183 | 0,344 | 2,04E-09 | 0 | Ehd4          |
| 1,69E-13 | -0,29426 | 0,383 | 0,546 | 2,09E-09 | 0 | Cbx3          |
| 1,69E-13 | -0,34403 | 0,125 | 0,261 | 2,09E-09 | 0 | Rrm1          |
| 1,84E-13 | -0,32268 | 0,281 | 0,45  | 2,28E-09 | 0 | Rev3l         |
| 2,06E-13 | 0,35009  | 0,352 | 0,213 | 2,55E-09 | 0 | Ifngr2        |
| 2,12E-13 | -0,26672 | 0,094 | 0,226 | 2,63E-09 | 0 | Hmgcs1        |
| 2,28E-13 | -0,32776 | 0,796 | 0,87  | 2,83E-09 | 0 | Ybx1          |
| 2,36E-13 | -0,3342  | 0,787 | 0,877 | 2,93E-09 | 0 | Sypl          |
| 2,74E-13 | -0,3096  | 0,475 | 0,636 | 3,39E-09 | 0 | Ppp2ca        |
| 3,05E-13 | -0,31133 | 0,429 | 0,599 | 3,78E-09 | 0 | Vdac2         |
| 4,18E-13 | 0,329557 | 0,788 | 0,691 | 5,18E-09 | 0 | lqgap1        |
| 4,32E-13 | -0,29241 | 0,214 | 0,368 | 5,35E-09 | 0 | Phf5a         |
| 4,33E-13 | -0,27586 | 0,658 | 0,791 | 5,36E-09 | 0 | Hnrnpf        |
| 4,54E-13 | 0,261796 | 0,959 | 0,94  | 5,62E-09 | 0 | Rpl36a        |
| 4,57E-13 | -0,25816 | 0,343 | 0,517 | 5,66E-09 | 0 | Atp5j2        |

|          |          |       |       |          |   |          |
|----------|----------|-------|-------|----------|---|----------|
| 4,69E-13 | -0,2609  | 0,304 | 0,48  | 5,8E-09  | 0 | Psmc8    |
| 4,92E-13 | -0,29483 | 0,252 | 0,419 | 6,09E-09 | 0 | Anapc16  |
| 5,87E-13 | -0,2596  | 0,849 | 0,923 | 7,27E-09 | 0 | Grb2     |
| 6,13E-13 | -0,32882 | 0,18  | 0,328 | 7,59E-09 | 0 | Vpreb3   |
| 6,45E-13 | -0,28313 | 0,406 | 0,577 | 7,98E-09 | 0 | Dbnl     |
| 6,72E-13 | -0,25837 | 0,27  | 0,436 | 8,32E-09 | 0 | Cdk4     |
| 7,22E-13 | -0,30126 | 0,561 | 0,715 | 8,94E-09 | 0 | Syk      |
| 7,41E-13 | -0,31079 | 0,42  | 0,575 | 9,17E-09 | 0 | Paics    |
| 8,52E-13 | -0,25703 | 0,243 | 0,407 | 1,06E-08 | 0 | Cuta     |
| 1,04E-12 | -0,26474 | 0,125 | 0,262 | 1,29E-08 | 0 | Pim1     |
| 1,17E-12 | -0,26924 | 0,294 | 0,468 | 1,44E-08 | 0 | Nme1     |
| 1,42E-12 | -0,287   | 0,239 | 0,396 | 1,76E-08 | 0 | Brwd1    |
| 1,47E-12 | 0,374094 | 0,549 | 0,417 | 1,82E-08 | 0 | Tlr1     |
| 1,51E-12 | -0,28013 | 0,574 | 0,731 | 1,87E-08 | 0 | Purb     |
| 1,51E-12 | 0,283842 | 0,978 | 0,946 | 1,87E-08 | 0 | Cd22     |
| 1,7E-12  | 0,296109 | 0,606 | 0,472 | 2,1E-08  | 0 | Nfkbia   |
| 1,73E-12 | -0,33942 | 0,377 | 0,537 | 2,14E-08 | 0 | Rftn1    |
| 1,76E-12 | -0,25022 | 0,168 | 0,318 | 2,18E-08 | 0 | Cyb5b    |
| 1,87E-12 | -0,26895 | 0,388 | 0,553 | 2,32E-08 | 0 | Taldo1   |
| 1,98E-12 | -0,26608 | 0,33  | 0,504 | 2,45E-08 | 0 | Atp5o    |
| 2E-12    | 0,384242 | 0,612 | 0,487 | 2,48E-08 | 0 | Sfrs18   |
| 2,04E-12 | -0,25921 | 0,988 | 0,988 | 2,52E-08 | 0 | Coro1a   |
| 2,33E-12 | 0,314662 | 0,423 | 0,284 | 2,89E-08 | 0 | Zmym5    |
| 2,45E-12 | -0,25005 | 0,123 | 0,257 | 3,03E-08 | 0 | Pqlc3    |
| 2,7E-12  | -0,29269 | 0,393 | 0,562 | 3,34E-08 | 0 | Syngn2   |
| 2,82E-12 | -0,2775  | 0,143 | 0,283 | 3,49E-08 | 0 | Nt5e     |
| 2,92E-12 | -0,26856 | 0,484 | 0,649 | 3,62E-08 | 0 | Tpm4     |
| 3,16E-12 | 0,383206 | 0,348 | 0,217 | 3,91E-08 | 0 | St8sia4  |
| 3,16E-12 | -0,26071 | 0,326 | 0,491 | 3,92E-08 | 0 | Atp5k    |
| 3,22E-12 | 0,28018  | 0,359 | 0,219 | 3,99E-08 | 0 | Zfp36l2  |
| 3,39E-12 | 0,348666 | 0,478 | 0,342 | 4,19E-08 | 0 | Gns      |
| 3,86E-12 | -0,26372 | 0,162 | 0,303 | 4,78E-08 | 0 | Ogfrl1   |
| 5,5E-12  | -0,26789 | 0,912 | 0,943 | 6,81E-08 | 0 | H3f3b    |
| 6,02E-12 | -0,27367 | 0,261 | 0,417 | 7,45E-08 | 0 | Al662270 |
| 6,31E-12 | 0,308523 | 0,388 | 0,252 | 7,81E-08 | 0 | Pbxip1   |
| 7,37E-12 | -0,30629 | 0,8   | 0,869 | 9,12E-08 | 0 | Limd2    |
| 7,43E-12 | -0,27119 | 0,241 | 0,388 | 9,19E-08 | 0 | Dek      |
| 7,44E-12 | 0,345544 | 0,452 | 0,319 | 9,21E-08 | 0 | Cytip    |
| 7,73E-12 | 0,379099 | 0,412 | 0,281 | 9,57E-08 | 0 | Pde4b    |
| 8,06E-12 | 0,25655  | 0,351 | 0,218 | 9,98E-08 | 0 | Arap1    |
| 9,66E-12 | -0,46014 | 0,462 | 0,609 | 1,2E-07  | 0 | Dusp2    |
| 1,01E-11 | -0,26231 | 0,099 | 0,219 | 1,25E-07 | 0 | Ngfrap1  |
| 1,05E-11 | -0,25715 | 0,681 | 0,794 | 1,3E-07  | 0 | Btf3     |
| 1,31E-11 | -0,28992 | 0,222 | 0,372 | 1,63E-07 | 0 | Lta      |
| 1,34E-11 | -0,26178 | 0,652 | 0,782 | 1,66E-07 | 0 | Slc25a3  |
| 1,39E-11 | 0,410728 | 0,32  | 0,205 | 1,72E-07 | 0 | Parm1    |
| 1,6E-11  | -0,33433 | 0,748 | 0,814 | 1,99E-07 | 0 | Trp53i11 |
| 1,76E-11 | 0,280677 | 0,329 | 0,198 | 2,18E-07 | 0 | Ugcg     |
| 2,03E-11 | -0,33971 | 0,071 | 0,181 | 2,52E-07 | 0 | Egr1     |
| 2,06E-11 | -0,28679 | 0,536 | 0,662 | 2,55E-07 | 0 | Rhog     |

|          |          |       |       |          |   |               |
|----------|----------|-------|-------|----------|---|---------------|
| 2,65E-11 | -0,25077 | 0,303 | 0,456 | 3,28E-07 | 0 | Uqcrq         |
| 3,06E-11 | -0,27812 | 0,21  | 0,347 | 3,79E-07 | 0 | Samd1         |
| 3,07E-11 | -0,27667 | 0,206 | 0,348 | 3,8E-07  | 0 | Ube2s         |
| 3,23E-11 | -0,27275 | 0,699 | 0,827 | 4E-07    | 0 | Atp5g2        |
| 3,97E-11 | -0,2511  | 0,354 | 0,514 | 4,91E-07 | 0 | Uqcrc2        |
| 4,86E-11 | -0,29147 | 0,323 | 0,472 | 6,01E-07 | 0 | Eif2s1        |
| 4,91E-11 | 0,286462 | 0,564 | 0,437 | 6,08E-07 | 0 | Hsp90b1       |
| 5,11E-11 | -0,25343 | 0,181 | 0,319 | 6,32E-07 | 0 | Ndufab1       |
| 5,36E-11 | -0,25569 | 0,79  | 0,878 | 6,63E-07 | 0 | Set           |
| 5,4E-11  | -0,28621 | 0,074 | 0,179 | 6,68E-07 | 0 | Tpx2          |
| 6,55E-11 | 0,25551  | 0,267 | 0,15  | 8,11E-07 | 0 | Fam120b       |
| 6,9E-11  | 0,312989 | 0,588 | 0,466 | 8,55E-07 | 0 | Cd47          |
| 7,57E-11 | 0,263653 | 0,284 | 0,167 | 9,38E-07 | 0 | Rap1gds1      |
| 8,02E-11 | 0,264527 | 0,23  | 0,121 | 9,93E-07 | 0 | Trim24        |
| 9,41E-11 | -0,26605 | 0,393 | 0,542 | 1,17E-06 | 0 | Ghitm         |
| 9,65E-11 | -0,2581  | 0,362 | 0,517 | 1,19E-06 | 0 | Cox17         |
| 9,7E-11  | 0,29418  | 0,468 | 0,337 | 1,2E-06  | 0 | Sptbn1        |
| 9,95E-11 | -0,27487 | 0,616 | 0,741 | 1,23E-06 | 0 | Plekha2       |
| 1,23E-10 | 0,373678 | 0,516 | 0,407 | 1,52E-06 | 0 | Tgfbr2        |
| 1,43E-10 | 0,288258 | 0,714 | 0,621 | 1,78E-06 | 0 | H2-T23        |
| 1,6E-10  | 0,333432 | 0,907 | 0,881 | 1,98E-06 | 0 | Mef2c         |
| 1,69E-10 | 0,314466 | 0,617 | 0,511 | 2,09E-06 | 0 | Wdr26         |
| 2,18E-10 | 0,268057 | 0,939 | 0,904 | 2,69E-06 | 0 | Ptpn6         |
| 2,27E-10 | 0,331758 | 0,474 | 0,355 | 2,81E-06 | 0 | Rasa3         |
| 2,29E-10 | 0,36677  | 0,333 | 0,219 | 2,84E-06 | 0 | Csnk1g3       |
| 2,55E-10 | -0,25972 | 0,652 | 0,768 | 3,16E-06 | 0 | Hnrnpu        |
| 3,39E-10 | -0,2849  | 0,687 | 0,785 | 4,2E-06  | 0 | Sp110         |
| 4,25E-10 | 0,290562 | 0,378 | 0,255 | 5,27E-06 | 0 | 4930523C07Rik |
| 4,4E-10  | -0,29398 | 0,096 | 0,201 | 5,44E-06 | 0 | Ube2c         |
| 4,4E-10  | 0,314238 | 0,928 | 0,854 | 5,45E-06 | 0 | Mir5109       |
| 5,67E-10 | -0,27636 | 0,413 | 0,558 | 7,01E-06 | 0 | Cd2ap         |
| 5,79E-10 | 0,270404 | 0,345 | 0,222 | 7,17E-06 | 0 | Zmym2         |
| 7,37E-10 | 0,269973 | 0,796 | 0,72  | 9,13E-06 | 0 | Ltb           |
| 7,65E-10 | -0,28861 | 0,359 | 0,499 | 9,47E-06 | 0 | Ndufa12       |
| 1,26E-09 | 0,313686 | 0,439 | 0,321 | 1,56E-05 | 0 | Ikbkb         |
| 1,28E-09 | 0,261144 | 0,326 | 0,209 | 1,59E-05 | 0 | Clec2d        |
| 1,37E-09 | -0,59318 | 0,726 | 0,789 | 1,7E-05  | 0 | Tuba1b        |
| 1,79E-09 | 0,284412 | 0,319 | 0,208 | 2,21E-05 | 0 | Iqsec1        |
| 1,91E-09 | 0,267526 | 0,422 | 0,3   | 2,36E-05 | 0 | Gramd1a       |
| 1,95E-09 | 0,272852 | 0,9   | 0,827 | 2,42E-05 | 0 | Apoe          |
| 2,35E-09 | 0,274748 | 0,471 | 0,344 | 2,91E-05 | 0 | Ctsc          |
| 2,47E-09 | 0,329346 | 0,461 | 0,342 | 3,06E-05 | 0 | Cbfa2t3       |
| 2,87E-09 | -0,26609 | 0,51  | 0,626 | 3,56E-05 | 0 | Hdac7         |
| 3,47E-09 | -0,31691 | 0,448 | 0,583 | 4,29E-05 | 0 | Smc4          |
| 3,49E-09 | 0,31136  | 0,416 | 0,311 | 4,32E-05 | 0 | Nxpe3         |
| 4,15E-09 | 0,302012 | 0,412 | 0,3   | 5,14E-05 | 0 | Reep3         |
| 4,48E-09 | 0,329458 | 0,775 | 0,728 | 5,54E-05 | 0 | Bcl11a        |
| 5,04E-09 | 0,274074 | 0,632 | 0,542 | 6,23E-05 | 0 | Tapbp         |
| 5,19E-09 | 0,287929 | 0,394 | 0,285 | 6,43E-05 | 0 | Stat6         |
| 5,22E-09 | 0,289926 | 0,681 | 0,584 | 6,46E-05 | 0 | Tbc1d10c      |

|          |          |       |       |          |   |         |
|----------|----------|-------|-------|----------|---|---------|
| 1,4E-08  | 0,262854 | 0,299 | 0,195 | 0,000174 | 0 | Ints4   |
| 1,41E-08 | 0,311173 | 0,47  | 0,375 | 0,000175 | 0 | Tnrc6b  |
| 1,45E-08 | 0,281265 | 0,683 | 0,597 | 0,00018  | 0 | Ciita   |
| 1,89E-08 | 0,293368 | 0,62  | 0,541 | 0,000234 | 0 | Arhgap4 |
| 2,32E-08 | 0,30008  | 0,53  | 0,436 | 0,000288 | 0 | Rasal3  |
| 2,99E-08 | 0,282445 | 0,514 | 0,429 | 0,00037  | 0 | Slc44a2 |
| 3,3E-08  | 0,263701 | 0,728 | 0,665 | 0,000409 | 0 | Smap2   |
| 3,75E-08 | 0,263945 | 0,345 | 0,242 | 0,000465 | 0 | Ppp3cc  |
| 3,78E-08 | 0,257353 | 0,3   | 0,197 | 0,000468 | 0 | Hps3    |
| 4,74E-08 | 0,253048 | 0,359 | 0,254 | 0,000586 | 0 | Cbx7    |
| 4,9E-08  | -0,44756 | 0,952 | 0,939 | 0,000607 | 0 | Ptma    |
| 4,97E-08 | 0,262728 | 0,665 | 0,59  | 0,000616 | 0 | H2-Oa   |
| 5,08E-08 | 0,323614 | 0,642 | 0,579 | 0,000628 | 0 | Ddx3x   |
| 5,75E-08 | -0,25571 | 0,123 | 0,221 | 0,000712 | 0 | Cenpa   |
| 7,77E-08 | 0,291552 | 0,457 | 0,359 | 0,000962 | 0 | Icosl   |
| 7,89E-08 | -0,25103 | 0,172 | 0,28  | 0,000977 | 0 | Cdc14b  |
| 8,1E-08  | 0,252753 | 0,587 | 0,486 | 0,001003 | 0 | Foxp1   |
| 8,79E-08 | -0,27126 | 0,412 | 0,537 | 0,001088 | 0 | Tmpo    |
| 1,05E-07 | -0,33509 | 0,42  | 0,539 | 0,001298 | 0 | Mif     |
| 1,15E-07 | 0,309916 | 0,343 | 0,243 | 0,001418 | 0 | Trim25  |
| 1,7E-07  | 0,274009 | 0,588 | 0,501 | 0,002101 | 0 | Wdfy4   |
| 1,71E-07 | 0,275191 | 0,384 | 0,28  | 0,002113 | 0 | Ssh2    |
| 1,85E-07 | 0,272819 | 0,401 | 0,298 | 0,002284 | 0 | Zfp217  |
| 1,87E-07 | 0,288105 | 0,697 | 0,628 | 0,002319 | 0 | Blk     |
| 1,93E-07 | 0,279657 | 0,401 | 0,3   | 0,002394 | 0 | Scd2    |
| 3,17E-07 | -0,25746 | 0,567 | 0,678 | 0,003923 | 0 | Tcof1   |
| 3,44E-07 | 0,273124 | 0,604 | 0,532 | 0,004253 | 0 | Crlf3   |
| 4,13E-07 | 0,264919 | 0,478 | 0,392 | 0,005113 | 0 | Dync1h1 |
| 4,33E-07 | 0,292482 | 0,439 | 0,345 | 0,005364 | 0 | Kif21b  |
| 4,35E-07 | 0,258464 | 0,794 | 0,737 | 0,005389 | 0 | Grk6    |
| 5,7E-07  | 0,256399 | 0,351 | 0,256 | 0,007052 | 0 | Cd84    |
| 1,1E-06  | 0,275751 | 0,667 | 0,596 | 0,013611 | 0 | Clk1    |
| 1,25E-06 | 0,259592 | 0,401 | 0,311 | 0,015516 | 0 | Tax1bp1 |
| 1,82E-06 | 0,285322 | 0,526 | 0,44  | 0,022572 | 0 | March1  |
| 1,93E-06 | 0,266596 | 0,309 | 0,223 | 0,023953 | 0 | Mdn1    |
| 2,5E-06  | 0,300972 | 0,455 | 0,382 | 0,030969 | 0 | Rapgef6 |
| 2,93E-06 | 0,283372 | 0,436 | 0,351 | 0,036243 | 0 | Mia3    |
| 3,2E-06  | 0,28094  | 0,549 | 0,482 | 0,039667 | 0 | Gpr18   |
| 3,63E-06 | 0,331951 | 0,464 | 0,385 | 0,044943 | 0 | Stk24   |
| 4,05E-06 | 0,270387 | 0,381 | 0,294 | 0,050118 | 0 | Cd2     |
| 4,52E-06 | 0,257033 | 0,506 | 0,433 | 0,055984 | 0 | Ppp1r18 |
| 4,66E-06 | 0,258588 | 0,567 | 0,487 | 0,057662 | 0 | Akap8   |
| 9,88E-06 | -0,25136 | 0,171 | 0,256 | 0,122356 | 0 | Slpi    |
| 3,45E-05 | 0,297812 | 0,432 | 0,366 | 0,42742  | 0 | Trim26  |
| 5,13E-05 | 0,26213  | 0,53  | 0,476 | 0,634717 | 0 | Zmiz2   |
| 0,000181 | 0,284585 | 0,428 | 0,373 | 1        | 0 | Add1    |
| 2,1E-139 | -1,8579  | 0,118 | 0,699 | 2,6E-135 | 1 | Mndal   |
| 3,3E-129 | 1,146317 | 0,967 | 0,566 | 4,1E-125 | 1 | Basp1   |
| 2,2E-128 | 1,249504 | 0,957 | 0,512 | 2,8E-124 | 1 | Igj     |
| 5,2E-121 | 1,127697 | 0,759 | 0,254 | 6,5E-117 | 1 | S1pr2   |

|          |          |       |       |          |   |               |
|----------|----------|-------|-------|----------|---|---------------|
| 4,3E-119 | -1,64943 | 0,198 | 0,702 | 5,4E-115 | 1 | Ly6d          |
| 1,8E-117 | 1,084687 | 0,833 | 0,311 | 2,2E-113 | 1 | Mef2b         |
| 2E-117   | -1,56831 | 0,135 | 0,658 | 2,5E-113 | 1 | Ifi203        |
| 2,8E-117 | 1,088992 | 0,774 | 0,272 | 3,5E-113 | 1 | Bcl6          |
| 6E-102   | -1,34956 | 0,701 | 0,896 | 7,48E-98 | 1 | Shisa5        |
| 1,2E-100 | -1,30719 | 0,445 | 0,799 | 1,51E-96 | 1 | Gimap4        |
| 3,8E-99  | -1,31506 | 0,092 | 0,575 | 4,64E-95 | 1 | Klf2          |
| 2,06E-96 | -0,8246  | 0,991 | 0,998 | 2,55E-92 | 1 | B2m           |
| 3,37E-94 | 1,036951 | 0,784 | 0,356 | 4,17E-90 | 1 | Aicda         |
| 4,29E-94 | -1,35277 | 0,164 | 0,626 | 5,32E-90 | 1 | Pml           |
| 8,17E-91 | 0,913663 | 0,777 | 0,277 | 1,01E-86 | 1 | Rgs13         |
| 4,79E-90 | 0,748077 | 1     | 0,999 | 5,93E-86 | 1 | Cfl1          |
| 3E-86    | -1,46978 | 0,334 | 0,708 | 3,72E-82 | 1 | Cmah          |
| 6,82E-85 | -1,12675 | 0,133 | 0,575 | 8,44E-81 | 1 | Sub1          |
| 7,13E-85 | -1,44608 | 0,139 | 0,566 | 8,83E-81 | 1 | Sell          |
| 1,6E-81  | -1,05878 | 0,132 | 0,554 | 1,98E-77 | 1 | Capg          |
| 5,48E-80 | -0,97816 | 0,059 | 0,478 | 6,79E-76 | 1 | S100a10       |
| 6,39E-77 | 0,694645 | 0,515 | 0,131 | 7,91E-73 | 1 | Nuggc         |
| 3,1E-76  | -0,84005 | 0,963 | 0,99  | 3,84E-72 | 1 | H2-K1         |
| 1,54E-75 | -1,10171 | 0,059 | 0,463 | 1,91E-71 | 1 | Bcl2          |
| 4,51E-69 | 0,742405 | 0,882 | 0,588 | 5,58E-65 | 1 | Arpc5l        |
| 3,91E-68 | 0,817823 | 0,796 | 0,453 | 4,84E-64 | 1 | Tmem131       |
| 7,1E-68  | 0,802094 | 0,88  | 0,594 | 8,79E-64 | 1 | Rhoh          |
| 1,98E-67 | -1,05729 | 0,104 | 0,488 | 2,45E-63 | 1 | Gm1966        |
| 1,34E-66 | 0,791526 | 0,669 | 0,295 | 1,65E-62 | 1 | Mbd4          |
| 1,27E-65 | 0,706819 | 0,558 | 0,189 | 1,58E-61 | 1 | Eaf2          |
| 2,79E-65 | 0,747692 | 0,694 | 0,299 | 3,46E-61 | 1 | 8430410A17Rik |
| 8,43E-63 | 0,728238 | 0,775 | 0,415 | 1,04E-58 | 1 | Apobec1       |
| 1,2E-62  | 0,556074 | 0,997 | 0,984 | 1,48E-58 | 1 | Ms4a1         |
| 4,73E-60 | 0,477442 | 0,376 | 0,08  | 5,85E-56 | 1 | Neil1         |
| 1,06E-57 | -0,68027 | 0,984 | 0,992 | 1,31E-53 | 1 | H2-D1         |
| 1,22E-57 | 0,818402 | 0,611 | 0,27  | 1,51E-53 | 1 | Lpp           |
| 1,99E-57 | -0,90422 | 0,161 | 0,514 | 2,46E-53 | 1 | Snn           |
| 4,6E-57  | 0,642053 | 0,999 | 0,972 | 5,7E-53  | 1 | Laptm5        |
| 1,89E-56 | 0,655766 | 0,513 | 0,185 | 2,34E-52 | 1 | Rassf6        |
| 2,91E-55 | 0,638379 | 0,552 | 0,214 | 3,6E-51  | 1 | Lpin2         |
| 7,72E-55 | 0,662768 | 0,632 | 0,29  | 9,56E-51 | 1 | Dcaf12        |
| 1,34E-54 | 0,698227 | 0,524 | 0,194 | 1,66E-50 | 1 | Rgs2          |
| 1,5E-54  | -0,85506 | 0,124 | 0,46  | 1,86E-50 | 1 | Map3k1        |
| 1,9E-54  | 0,645972 | 0,488 | 0,172 | 2,35E-50 | 1 | Lipc          |
| 3,31E-54 | -0,77998 | 0,036 | 0,35  | 4,1E-50  | 1 | Gpr183        |
| 5,28E-54 | 0,560145 | 0,99  | 0,92  | 6,54E-50 | 1 | Nap1l1        |
| 8,15E-54 | 0,764388 | 0,743 | 0,414 | 1,01E-49 | 1 | Mtf2          |
| 1,03E-53 | -0,77468 | 0,037 | 0,349 | 1,27E-49 | 1 | Cd55          |
| 4,88E-53 | 0,500949 | 0,388 | 0,098 | 6,04E-49 | 1 | Mybl1         |
| 2,45E-52 | 0,739134 | 0,648 | 0,309 | 3,04E-48 | 1 | Gcsam         |
| 1,87E-51 | -0,6907  | 0,061 | 0,372 | 2,31E-47 | 1 | Itgb7         |
| 7,02E-51 | 0,529923 | 0,981 | 0,944 | 8,69E-47 | 1 | Myl6          |
| 5,14E-50 | 0,637887 | 0,756 | 0,428 | 6,37E-46 | 1 | Ppp4r2        |
| 1,16E-49 | -0,51968 | 0,997 | 1     | 1,43E-45 | 1 | Ly6e          |



|          |          |       |       |          |   |           |
|----------|----------|-------|-------|----------|---|-----------|
| 1,36E-48 | -0,72052 | 0,03  | 0,314 | 1,68E-44 | 1 | Arhgef18  |
| 1,38E-48 | 0,617356 | 0,55  | 0,234 | 1,71E-44 | 1 | Ell3      |
| 1,71E-48 | 0,749567 | 0,778 | 0,5   | 2,11E-44 | 1 | Bach2     |
| 4,28E-48 | 0,570378 | 0,509 | 0,197 | 5,29E-44 | 1 | Dstn      |
| 1,35E-47 | -0,93526 | 0,402 | 0,662 | 1,68E-43 | 1 | Bank1     |
| 1,43E-47 | -0,62764 | 0,022 | 0,298 | 1,78E-43 | 1 | Ccr6      |
| 4,43E-47 | -0,81305 | 0,209 | 0,516 | 5,49E-43 | 1 | Add3      |
| 6,27E-47 | -0,89161 | 0,286 | 0,588 | 7,77E-43 | 1 | Fam65b    |
| 3,91E-46 | 0,770695 | 0,664 | 0,379 | 4,84E-42 | 1 | Hpse      |
| 4,58E-45 | -0,38124 | 1     | 0,999 | 5,66E-41 | 1 | Rps24     |
| 3,39E-44 | -0,81777 | 0,982 | 0,967 | 4,19E-40 | 1 | Malat1    |
| 5,28E-44 | -0,72168 | 0,04  | 0,309 | 6,53E-40 | 1 | S1pr1     |
| 7,99E-44 | 0,576277 | 0,945 | 0,792 | 9,89E-40 | 1 | Sypl      |
| 9,44E-44 | -0,77076 | 0,216 | 0,509 | 1,17E-39 | 1 | Anxa6     |
| 2,05E-43 | -0,78517 | 0,359 | 0,626 | 2,53E-39 | 1 | Gimap3    |
| 2,75E-42 | -0,67547 | 0,055 | 0,327 | 3,41E-38 | 1 | Zfp318    |
| 8,07E-42 | -0,71161 | 0,747 | 0,847 | 9,99E-38 | 1 | Btg1      |
| 1,32E-41 | -0,90286 | 0,612 | 0,792 | 1,64E-37 | 1 | Ly6a      |
| 1,57E-41 | 0,645741 | 0,74  | 0,47  | 1,94E-37 | 1 | Foxo1     |
| 2,58E-41 | 0,418087 | 0,314 | 0,079 | 3,19E-37 | 1 | Efnb1     |
| 3,54E-41 | 0,474331 | 0,994 | 0,977 | 4,38E-37 | 1 | Arpc2     |
| 5,39E-41 | 0,654701 | 0,793 | 0,566 | 6,67E-37 | 1 | Top1      |
| 5,4E-41  | 0,541492 | 0,874 | 0,601 | 6,68E-37 | 1 | Txn1      |
| 3,28E-40 | 0,505756 | 0,538 | 0,244 | 4,07E-36 | 1 | Dap       |
| 4,73E-40 | 0,519976 | 0,686 | 0,397 | 5,86E-36 | 1 | Mtss1     |
| 4,98E-40 | 0,597851 | 0,858 | 0,691 | 6,16E-36 | 1 | Bptf      |
| 6,86E-40 | 0,436607 | 0,999 | 0,996 | 8,49E-36 | 1 | Actg1     |
| 8,39E-40 | -0,66339 | 0,09  | 0,363 | 1,04E-35 | 1 | Serpinb1a |
| 1,04E-39 | 0,542745 | 0,583 | 0,285 | 1,29E-35 | 1 | Anxa2     |
| 2,75E-39 | 0,623743 | 0,802 | 0,559 | 3,4E-35  | 1 | Erp44     |
| 3,97E-39 | 0,37567  | 0,254 | 0,051 | 4,92E-35 | 1 | Gm2447    |
| 4,22E-39 | -0,78326 | 0,343 | 0,603 | 5,22E-35 | 1 | Itm2b     |
| 5,16E-39 | -0,48907 | 0,016 | 0,25  | 6,39E-35 | 1 | Cd97      |
| 8,99E-39 | 0,497357 | 0,433 | 0,168 | 1,11E-34 | 1 | Emid1     |
| 1,79E-38 | -0,58885 | 0,107 | 0,376 | 2,22E-34 | 1 | Esyt1     |
| 4,57E-38 | 0,556738 | 0,84  | 0,649 | 5,66E-34 | 1 | Ube2d2a   |
| 5,38E-38 | 0,640249 | 0,92  | 0,828 | 6,66E-34 | 1 | Cnn2      |
| 6,17E-38 | 0,531696 | 0,794 | 0,544 | 7,64E-34 | 1 | Pold4     |
| 6,73E-38 | -0,59895 | 0,041 | 0,283 | 8,34E-34 | 1 | Scml4     |
| 1,12E-37 | 0,512758 | 0,404 | 0,152 | 1,39E-33 | 1 | Sh2b2     |
| 1,17E-37 | 0,512266 | 0,593 | 0,303 | 1,45E-33 | 1 | Helq      |
| 1,42E-37 | 0,555863 | 0,692 | 0,4   | 1,76E-33 | 1 | Pitpnc1   |
| 1,78E-37 | -0,62901 | 0,192 | 0,463 | 2,2E-33  | 1 | Cyb561a3  |
| 2,23E-37 | 0,487877 | 0,629 | 0,332 | 2,77E-33 | 1 | Glrx3     |
| 3,52E-37 | -0,49734 | 0,047 | 0,289 | 4,35E-33 | 1 | Sbk1      |
| 7,89E-37 | 0,524663 | 0,651 | 0,349 | 9,77E-33 | 1 | Dck       |
| 9,89E-37 | -0,76964 | 0,036 | 0,267 | 1,22E-32 | 1 | Plac8     |
| 1,14E-36 | -0,55154 | 0,083 | 0,337 | 1,41E-32 | 1 | Cdkn1b    |
| 1,37E-36 | 0,546385 | 0,768 | 0,478 | 1,7E-32  | 1 | Klhl6     |
| 5,16E-36 | 0,469752 | 0,926 | 0,726 | 6,39E-32 | 1 | Pou2af1   |

|          |          |       |       |          |   |               |
|----------|----------|-------|-------|----------|---|---------------|
| 1,02E-35 | 0,406492 | 0,999 | 0,988 | 1,26E-31 | 1 | Cd79b         |
| 1,04E-35 | 0,514229 | 0,701 | 0,431 | 1,29E-31 | 1 | Syvn1         |
| 1,46E-35 | 0,511638 | 0,642 | 0,359 | 1,81E-31 | 1 | Rfc1          |
| 1,65E-35 | -0,58985 | 0,142 | 0,402 | 2,04E-31 | 1 | Lrrc33        |
| 2,11E-35 | -0,77845 | 0,22  | 0,481 | 2,61E-31 | 1 | Dgka          |
| 3,65E-35 | 0,413352 | 0,407 | 0,157 | 4,52E-31 | 1 | Ccnd3         |
| 4,49E-35 | 0,478145 | 0,435 | 0,184 | 5,56E-31 | 1 | Havcr1        |
| 5,7E-35  | 0,517684 | 0,991 | 0,979 | 7,06E-31 | 1 | Ucp2          |
| 6,02E-35 | 0,447147 | 0,354 | 0,123 | 7,46E-31 | 1 | Cnst          |
| 9,16E-35 | 0,467507 | 0,466 | 0,205 | 1,13E-30 | 1 | Bzw2          |
| 2,4E-34  | 0,354957 | 0,287 | 0,08  | 2,98E-30 | 1 | 2510009E07Rik |
| 2,42E-34 | -0,83051 | 0,346 | 0,571 | 3E-30    | 1 | Itga4         |
| 2,72E-34 | -0,7049  | 0,439 | 0,656 | 3,37E-30 | 1 | Gimap6        |
| 8,26E-34 | 0,416658 | 0,293 | 0,086 | 1,02E-29 | 1 | Ccdc17        |
| 1,02E-33 | 0,517325 | 0,833 | 0,635 | 1,27E-29 | 1 | Tnfaip8       |
| 1,3E-33  | -0,71622 | 0,763 | 0,855 | 1,61E-29 | 1 | Macf1         |
| 1,34E-33 | 0,438665 | 0,447 | 0,196 | 1,66E-29 | 1 | Mtmr14        |
| 1,42E-33 | -0,68342 | 0,226 | 0,489 | 1,76E-29 | 1 | B3gnt5        |
| 3,25E-33 | -0,52884 | 0,09  | 0,331 | 4,02E-29 | 1 | Itpr1         |
| 4,53E-33 | -0,71075 | 0,293 | 0,543 | 5,6E-29  | 1 | Evi2b         |
| 8,63E-33 | 0,328396 | 0,256 | 0,065 | 1,07E-28 | 1 | Gnb4          |
| 1,11E-32 | 0,60351  | 0,704 | 0,49  | 1,38E-28 | 1 | Scaf11        |
| 1,65E-32 | -0,59698 | 0,111 | 0,351 | 2,04E-28 | 1 | Fgd2          |
| 3,83E-32 | -0,48646 | 0,021 | 0,222 | 4,74E-28 | 1 | Cd38          |
| 5,5E-32  | 0,489831 | 0,895 | 0,733 | 6,81E-28 | 1 | Ccdc50        |
| 7,72E-32 | 0,446784 | 0,391 | 0,159 | 9,55E-28 | 1 | Cecr2         |
| 1,02E-31 | 0,472576 | 0,53  | 0,267 | 1,26E-27 | 1 | Atp8a1        |
| 1,12E-31 | -0,55881 | 0,111 | 0,349 | 1,38E-27 | 1 | Man1a         |
| 2,1E-31  | 0,400119 | 0,377 | 0,147 | 2,6E-27  | 1 | Ildr1         |
| 6,92E-31 | -0,46345 | 0,092 | 0,33  | 8,57E-27 | 1 | Hhex          |
| 8,1E-31  | 0,369774 | 0,346 | 0,128 | 1E-26    | 1 | Lst1          |
| 1,07E-30 | 0,321187 | 0,188 | 0,034 | 1,32E-26 | 1 | Cacna1h       |
| 1,37E-30 | 0,524737 | 0,882 | 0,733 | 1,69E-26 | 1 | Mzb1          |
| 2,66E-30 | 0,471325 | 0,5   | 0,257 | 3,29E-26 | 1 | Brwd1         |
| 4,31E-30 | 0,47363  | 0,917 | 0,807 | 5,34E-26 | 1 | Limd2         |
| 4,52E-30 | 0,413773 | 0,33  | 0,121 | 5,6E-26  | 1 | Endou         |
| 6,03E-30 | -0,46003 | 0,018 | 0,205 | 7,47E-26 | 1 | Ahnak         |
| 6,42E-30 | -0,6946  | 0,731 | 0,827 | 7,95E-26 | 1 | Mycbp2        |
| 8,32E-30 | 0,348576 | 0,226 | 0,057 | 1,03E-25 | 1 | Pdzd2         |
| 1,07E-29 | -0,61749 | 0,064 | 0,274 | 1,32E-25 | 1 | Irgm1         |
| 1,12E-29 | 0,437546 | 0,506 | 0,257 | 1,39E-25 | 1 | Sema7a        |
| 1,25E-29 | -0,58183 | 0,308 | 0,53  | 1,54E-25 | 1 | Psap          |
| 1,83E-29 | -0,51983 | 0,234 | 0,471 | 2,27E-25 | 1 | 2310034O05Rik |
| 3,38E-29 | -0,60376 | 0,226 | 0,466 | 4,19E-25 | 1 | Clic4         |
| 4,49E-29 | -0,37631 | 0,01  | 0,187 | 5,56E-25 | 1 | Plbd1         |
| 5,1E-29  | 0,393425 | 0,297 | 0,102 | 6,31E-25 | 1 | Cpne5         |
| 5,38E-29 | 0,441564 | 0,874 | 0,735 | 6,66E-25 | 1 | Clic1         |
| 7,09E-29 | 0,397074 | 0,358 | 0,142 | 8,78E-25 | 1 | Rgs10         |
| 8,87E-29 | -0,42286 | 0,027 | 0,214 | 1,1E-24  | 1 | Ckap4         |
| 1,32E-28 | -0,57632 | 0,179 | 0,407 | 1,64E-24 | 1 | Ier5          |

|          |          |       |       |          |   |               |
|----------|----------|-------|-------|----------|---|---------------|
| 1,37E-28 | 0,453361 | 0,475 | 0,237 | 1,69E-24 | 1 | Lta           |
| 1,69E-28 | -0,44645 | 0,038 | 0,231 | 2,09E-24 | 1 | Bhlhe41       |
| 2,34E-28 | -0,72002 | 0,336 | 0,559 | 2,9E-24  | 1 | Dock10        |
| 2,53E-28 | 0,408561 | 0,808 | 0,544 | 3,14E-24 | 1 | Hmgn1         |
| 4,56E-28 | -0,4705  | 0,101 | 0,32  | 5,64E-24 | 1 | Notch2        |
| 5,26E-28 | 0,419649 | 0,485 | 0,245 | 6,51E-24 | 1 | Synrg         |
| 6,06E-28 | -0,50579 | 0,203 | 0,435 | 7,51E-24 | 1 | Myl12b        |
| 6,87E-28 | -0,59827 | 0,59  | 0,729 | 8,5E-24  | 1 | Scd1          |
| 1,42E-27 | 0,344705 | 0,365 | 0,151 | 1,75E-23 | 1 | Dennd3        |
| 1,5E-27  | 0,462582 | 0,889 | 0,744 | 1,85E-23 | 1 | Spib          |
| 2,09E-27 | -0,41477 | 0,025 | 0,204 | 2,59E-23 | 1 | Kctd14        |
| 2,51E-27 | -0,38837 | 0,028 | 0,21  | 3,11E-23 | 1 | Cnn3          |
| 2,72E-27 | -0,37606 | 0,021 | 0,196 | 3,37E-23 | 1 | Ccr7          |
| 2,75E-27 | 0,2625   | 0,249 | 0,074 | 3,4E-23  | 1 | Clip2         |
| 2,92E-27 | 0,418393 | 0,441 | 0,212 | 3,61E-23 | 1 | Eif2ak3       |
| 3,15E-27 | 0,418105 | 0,362 | 0,156 | 3,9E-23  | 1 | Gadd45b       |
| 3,6E-27  | -0,38309 | 0,987 | 0,998 | 4,45E-23 | 1 | Rps21         |
| 3,75E-27 | 0,465761 | 0,602 | 0,367 | 4,64E-23 | 1 | Cerk          |
| 3,75E-27 | 0,386303 | 0,908 | 0,726 | 4,65E-23 | 1 | Slc25a5       |
| 5,18E-27 | 0,407971 | 0,32  | 0,124 | 6,42E-23 | 1 | Btnl2         |
| 5,7E-27  | 0,380999 | 0,383 | 0,166 | 7,05E-23 | 1 | Fut8          |
| 8,75E-27 | 0,333198 | 0,996 | 0,991 | 1,08E-22 | 1 | Rpl28         |
| 8,81E-27 | 0,379629 | 0,293 | 0,107 | 1,09E-22 | 1 | Stxbp1        |
| 1,04E-26 | 0,512225 | 0,922 | 0,849 | 1,29E-22 | 1 | Stt3b         |
| 1,07E-26 | 0,462463 | 0,735 | 0,505 | 1,32E-22 | 1 | Mbd2          |
| 1,71E-26 | 0,42594  | 0,916 | 0,823 | 2,12E-22 | 1 | Arpc4         |
| 1,77E-26 | 0,420878 | 0,49  | 0,259 | 2,19E-22 | 1 | Fas           |
| 2,59E-26 | 0,430082 | 0,673 | 0,458 | 3,2E-22  | 1 | Lpxn          |
| 3,55E-26 | 0,382933 | 0,985 | 0,956 | 4,4E-22  | 1 | Calm1         |
| 4,39E-26 | 0,430071 | 0,744 | 0,51  | 5,43E-22 | 1 | Usp7          |
| 4,52E-26 | -0,47928 | 0,062 | 0,255 | 5,59E-22 | 1 | Kctd12        |
| 5,08E-26 | 0,334987 | 0,297 | 0,11  | 6,29E-22 | 1 | Cep164        |
| 1E-25    | -0,64745 | 0,349 | 0,558 | 1,24E-21 | 1 | Txnip         |
| 1,51E-25 | 0,379293 | 0,652 | 0,404 | 1,87E-21 | 1 | Arpc3         |
| 1,51E-25 | 0,321562 | 0,306 | 0,117 | 1,88E-21 | 1 | Parp8         |
| 3,26E-25 | 0,403214 | 0,643 | 0,411 | 4,04E-21 | 1 | 1700021K19Rik |
| 3,29E-25 | 0,399393 | 0,925 | 0,83  | 4,07E-21 | 1 | Tnfrsf13c     |
| 3,31E-25 | 0,442694 | 0,84  | 0,721 | 4,09E-21 | 1 | Capzb         |
| 3,35E-25 | -0,69362 | 0,737 | 0,824 | 4,15E-21 | 1 | Faim3         |
| 4,07E-25 | 0,381085 | 0,43  | 0,212 | 5,03E-21 | 1 | Xrcc1         |
| 4,09E-25 | -0,40878 | 0,058 | 0,244 | 5,06E-21 | 1 | Il10rb        |
| 5,67E-25 | 0,439826 | 0,425 | 0,213 | 7,02E-21 | 1 | Tgfbr1        |
| 6,14E-25 | -0,56896 | 0,219 | 0,433 | 7,6E-21  | 1 | Tubb4b        |
| 8,64E-25 | 0,44157  | 0,484 | 0,268 | 1,07E-20 | 1 | Bcl7a         |
| 8,91E-25 | 0,438451 | 0,744 | 0,519 | 1,1E-20  | 1 | Lrmp          |
| 1,18E-24 | 0,477644 | 0,754 | 0,577 | 1,47E-20 | 1 | Crip1         |
| 1,31E-24 | 0,439235 | 0,601 | 0,373 | 1,62E-20 | 1 | Rere          |
| 1,39E-24 | 0,659318 | 0,697 | 0,484 | 1,72E-20 | 1 | Dusp2         |
| 2,26E-24 | 0,443108 | 0,5   | 0,281 | 2,8E-20  | 1 | Pafah1b3      |
| 2,93E-24 | 0,35748  | 0,333 | 0,142 | 3,62E-20 | 1 | Abr           |

|          |          |       |       |          |   |               |
|----------|----------|-------|-------|----------|---|---------------|
| 4,2E-24  | -0,36431 | 0,976 | 0,995 | 5,2E-20  | 1 | Rpl38         |
| 6,38E-24 | -0,43703 | 0,043 | 0,214 | 7,9E-20  | 1 | Kbtbd11       |
| 6,94E-24 | -0,42133 | 0,01  | 0,158 | 8,59E-20 | 1 | Sspn          |
| 9,43E-24 | 0,410317 | 0,426 | 0,215 | 1,17E-19 | 1 | Ehd4          |
| 1,13E-23 | -0,41264 | 0,03  | 0,191 | 1,4E-19  | 1 | Myo1f         |
| 1,3E-23  | -0,7629  | 0,391 | 0,571 | 1,61E-19 | 1 | Vim           |
| 1,59E-23 | 0,374691 | 0,688 | 0,444 | 1,97E-19 | 1 | Marcksl1      |
| 2,18E-23 | -0,6285  | 0,536 | 0,693 | 2,69E-19 | 1 | B4galnt1      |
| 2,28E-23 | -0,50288 | 0,342 | 0,555 | 2,82E-19 | 1 | Hsp90b1       |
| 2,46E-23 | -0,43646 | 0,043 | 0,211 | 3,05E-19 | 1 | Marcks        |
| 2,47E-23 | -0,5251  | 0,268 | 0,47  | 3,06E-19 | 1 | Ubl3          |
| 2,56E-23 | 0,37719  | 0,93  | 0,837 | 3,17E-19 | 1 | Arpc1b        |
| 3,44E-23 | -0,31535 | 0,03  | 0,19  | 4,26E-19 | 1 | Fxyd5         |
| 4,64E-23 | 0,250031 | 1     | 1     | 5,74E-19 | 1 | Actb          |
| 4,98E-23 | -0,34081 | 0,019 | 0,17  | 6,17E-19 | 1 | Tmem154       |
| 5,56E-23 | 0,297277 | 0,997 | 0,98  | 6,88E-19 | 1 | Fth1          |
| 6,12E-23 | -0,33473 | 0,033 | 0,194 | 7,58E-19 | 1 | Gpr174        |
| 6,73E-23 | 0,270454 | 0,271 | 0,1   | 8,34E-19 | 1 | Ada           |
| 7,24E-23 | 0,468277 | 0,865 | 0,751 | 8,96E-19 | 1 | Trp53i11      |
| 8,48E-23 | -0,53621 | 0,655 | 0,778 | 1,05E-18 | 1 | Stk17b        |
| 1,41E-22 | -0,55061 | 0,254 | 0,459 | 1,74E-18 | 1 | Stk10         |
| 1,86E-22 | 0,4001   | 0,639 | 0,421 | 2,3E-18  | 1 | Ssbp3         |
| 1,97E-22 | -0,41465 | 0,027 | 0,18  | 2,44E-18 | 1 | Ccnd2         |
| 2,46E-22 | 0,287574 | 0,257 | 0,094 | 3,05E-18 | 1 | Itgb3         |
| 2,48E-22 | 0,254694 | 0,141 | 0,026 | 3,07E-18 | 1 | Chrna9        |
| 2,65E-22 | 0,273272 | 0,166 | 0,04  | 3,29E-18 | 1 | Usp2          |
| 2,77E-22 | -0,39128 | 0,047 | 0,211 | 3,43E-18 | 1 | Ddx58         |
| 3,29E-22 | -0,31926 | 0,025 | 0,177 | 4,08E-18 | 1 | Ski           |
| 4,66E-22 | 0,382593 | 0,806 | 0,639 | 5,77E-18 | 1 | Plekha2       |
| 6,69E-22 | -0,31649 | 0,04  | 0,201 | 8,29E-18 | 1 | Setd1b        |
| 7,51E-22 | -0,50756 | 0,43  | 0,621 | 9,29E-18 | 1 | Samd9l        |
| 7,65E-22 | 0,307699 | 0,234 | 0,08  | 9,47E-18 | 1 | Nlr1          |
| 9,1E-22  | 0,426334 | 0,707 | 0,521 | 1,13E-17 | 1 | Hdac7         |
| 9,32E-22 | -0,41481 | 0,127 | 0,316 | 1,15E-17 | 1 | 2900060B14Rik |
| 9,57E-22 | -0,43829 | 0,132 | 0,325 | 1,19E-17 | 1 | Emp3          |
| 1,18E-21 | 0,382415 | 0,768 | 0,603 | 1,46E-17 | 1 | Epn1          |
| 1,47E-21 | 0,402992 | 0,71  | 0,517 | 1,81E-17 | 1 | Tcea1         |
| 1,5E-21  | 0,342833 | 0,33  | 0,148 | 1,86E-17 | 1 | Osbpl3        |
| 1,58E-21 | 0,296711 | 0,263 | 0,1   | 1,96E-17 | 1 | Smco4         |
| 1,79E-21 | 0,407614 | 0,543 | 0,33  | 2,21E-17 | 1 | Odc1          |
| 1,99E-21 | 0,389294 | 0,568 | 0,362 | 2,47E-17 | 1 | Phf6          |
| 2,15E-21 | 0,31042  | 0,889 | 0,712 | 2,67E-17 | 1 | Gapdh         |
| 2,35E-21 | 0,260254 | 0,266 | 0,103 | 2,91E-17 | 1 | Rev1          |
| 2,68E-21 | 0,359278 | 0,543 | 0,337 | 3,32E-17 | 1 | Plekho1       |
| 3,21E-21 | 0,380425 | 0,49  | 0,281 | 3,97E-17 | 1 | Atad1         |
| 3,25E-21 | 0,418226 | 0,527 | 0,319 | 4,02E-17 | 1 | Rev3l         |
| 3,33E-21 | 0,339371 | 0,401 | 0,206 | 4,12E-17 | 1 | Smagp         |
| 3,56E-21 | -0,53698 | 0,299 | 0,491 | 4,41E-17 | 1 | Ncf1          |
| 3,59E-21 | -0,42013 | 0,03  | 0,177 | 4,44E-17 | 1 | Serpina3g     |
| 3,7E-21  | -0,32943 | 0,012 | 0,145 | 4,58E-17 | 1 | Fam46a        |

|          |          |       |       |          |   |               |
|----------|----------|-------|-------|----------|---|---------------|
| 3,95E-21 | -0,26406 | 0,018 | 0,157 | 4,89E-17 | 1 | Fam43a        |
| 4,16E-21 | 0,321075 | 0,342 | 0,159 | 5,15E-17 | 1 | Rnf41         |
| 6,81E-21 | -0,4832  | 0,098 | 0,273 | 8,44E-17 | 1 | Lgals9        |
| 8,76E-21 | -0,58576 | 0,51  | 0,652 | 1,08E-16 | 1 | Lmo2          |
| 1,04E-20 | 0,365564 | 0,577 | 0,365 | 1,29E-16 | 1 | Cdk2ap2       |
| 1,58E-20 | -0,3855  | 0,109 | 0,288 | 1,96E-16 | 1 | Ppcs          |
| 1,84E-20 | 0,417459 | 0,426 | 0,229 | 2,28E-16 | 1 | Lacc1         |
| 2,4E-20  | 0,343213 | 0,978 | 0,947 | 2,97E-16 | 1 | Pfn1          |
| 2,62E-20 | -0,43914 | 0,286 | 0,488 | 3,24E-16 | 1 | S100a11       |
| 2,86E-20 | -0,3714  | 0,075 | 0,243 | 3,54E-16 | 1 | Abcg1         |
| 3,1E-20  | 0,310153 | 0,331 | 0,155 | 3,84E-16 | 1 | 4833439L19Rik |
| 3,22E-20 | -0,55705 | 0,339 | 0,517 | 3,99E-16 | 1 | Filip1l       |
| 3,98E-20 | 0,394874 | 0,698 | 0,507 | 4,93E-16 | 1 | Polr1d        |
| 5,72E-20 | 0,326877 | 0,379 | 0,191 | 7,08E-16 | 1 | Dtx1          |
| 5,99E-20 | 0,346849 | 0,509 | 0,298 | 7,42E-16 | 1 | Asap1         |
| 6,99E-20 | -0,3196  | 0,053 | 0,208 | 8,66E-16 | 1 | Arhgef3       |
| 7,27E-20 | 0,322537 | 0,482 | 0,278 | 9E-16    | 1 | Trim35        |
| 7,36E-20 | 0,338668 | 0,95  | 0,869 | 9,11E-16 | 1 | Grb2          |
| 9,3E-20  | -0,32278 | 0,016 | 0,146 | 1,15E-15 | 1 | Slfn5         |
| 1,12E-19 | 0,340556 | 0,348 | 0,172 | 1,38E-15 | 1 | Ccdc71l       |
| 1,32E-19 | 0,335843 | 0,988 | 0,988 | 1,64E-15 | 1 | Coro1a        |
| 1,38E-19 | 0,323276 | 0,515 | 0,314 | 1,7E-15  | 1 | Scimp         |
| 1,74E-19 | 0,329595 | 0,377 | 0,189 | 2,16E-15 | 1 | Ogfrl1        |
| 1,82E-19 | -0,33989 | 0,074 | 0,238 | 2,25E-15 | 1 | Evi2a         |
| 2,38E-19 | 0,322959 | 0,929 | 0,835 | 2,94E-15 | 1 | Cd24a         |
| 2,65E-19 | 0,291747 | 0,365 | 0,183 | 3,28E-15 | 1 | 1110018G07Rik |
| 2,78E-19 | 0,261262 | 0,376 | 0,187 | 3,44E-15 | 1 | Plxnb2        |
| 3,54E-19 | 0,373595 | 0,817 | 0,642 | 4,38E-15 | 1 | Pten          |
| 3,9E-19  | 0,352035 | 0,75  | 0,561 | 4,82E-15 | 1 | Cox6b1        |
| 4,25E-19 | -0,55329 | 0,405 | 0,554 | 5,26E-15 | 1 | Gimap8        |
| 5,47E-19 | -0,414   | 0,201 | 0,384 | 6,77E-15 | 1 | Tspan32       |
| 1E-18    | 0,329367 | 0,405 | 0,218 | 1,24E-14 | 1 | C130026I21Rik |
| 1,42E-18 | -0,39082 | 0,115 | 0,285 | 1,76E-14 | 1 | Neat1         |
| 1,77E-18 | 0,320931 | 0,88  | 0,733 | 2,2E-14  | 1 | Anp32b        |
| 1,81E-18 | -0,2558  | 0,027 | 0,159 | 2,25E-14 | 1 | Gm15987       |
| 1,97E-18 | -0,28837 | 0,062 | 0,215 | 2,43E-14 | 1 | Pdcd4         |
| 2,28E-18 | -0,25419 | 0,018 | 0,141 | 2,82E-14 | 1 | Irak3         |
| 2,66E-18 | -0,47686 | 0,266 | 0,453 | 3,29E-14 | 1 | Ctsc          |
| 2,79E-18 | 0,320947 | 0,49  | 0,29  | 3,46E-14 | 1 | Arl5a         |
| 2,83E-18 | 0,39718  | 0,771 | 0,607 | 3,51E-14 | 1 | Ppp1ca        |
| 2,94E-18 | 0,354311 | 0,541 | 0,352 | 3,63E-14 | 1 | Rbm38         |
| 3,58E-18 | 0,359142 | 0,663 | 0,479 | 4,43E-14 | 1 | Sema4d        |
| 3,94E-18 | -0,41804 | 0,083 | 0,238 | 4,87E-14 | 1 | Pydc3         |
| 4,96E-18 | -0,34255 | 0,016 | 0,136 | 6,14E-14 | 1 | Ptpn22        |
| 5,62E-18 | 0,358645 | 0,513 | 0,326 | 6,96E-14 | 1 | Commd4        |
| 5,89E-18 | 0,319058 | 0,541 | 0,347 | 7,29E-14 | 1 | D930015E06Rik |
| 6,14E-18 | 0,294678 | 0,999 | 0,989 | 7,6E-14  | 1 | Pabpc1        |
| 6,45E-18 | 0,358276 | 0,678 | 0,498 | 7,98E-14 | 1 | Clta          |
| 6,56E-18 | 0,350674 | 0,692 | 0,513 | 8,12E-14 | 1 | Akr1a1        |
| 7,19E-18 | -0,28601 | 0,028 | 0,156 | 8,9E-14  | 1 | Spn           |

|          |          |       |       |          |   |               |
|----------|----------|-------|-------|----------|---|---------------|
| 7,82E-18 | 0,415159 | 0,235 | 0,093 | 9,68E-14 | 1 | Egr1          |
| 8,15E-18 | -0,2848  | 0,049 | 0,19  | 1,01E-13 | 1 | Il27ra        |
| 9,2E-18  | -0,26175 | 0,999 | 0,999 | 1,14E-13 | 1 | Rpl13         |
| 1,46E-17 | -0,40481 | 0,034 | 0,163 | 1,8E-13  | 1 | Gbp7          |
| 1,59E-17 | 0,334001 | 0,635 | 0,455 | 1,96E-13 | 1 | Dbnl          |
| 1,88E-17 | 0,355154 | 0,754 | 0,586 | 2,32E-13 | 1 | Ikzf1         |
| 2,83E-17 | 0,344711 | 0,482 | 0,299 | 3,5E-13  | 1 | Ube2h         |
| 3,07E-17 | -0,44295 | 0,17  | 0,338 | 3,8E-13  | 1 | Chd2          |
| 3,81E-17 | -0,46891 | 0,41  | 0,576 | 4,71E-13 | 1 | Nfkbia        |
| 3,86E-17 | 0,265146 | 0,3   | 0,144 | 4,78E-13 | 1 | Adam9         |
| 4,19E-17 | 0,275101 | 0,401 | 0,226 | 5,19E-13 | 1 | Abhd17a       |
| 5,53E-17 | -0,38033 | 0,136 | 0,3   | 6,85E-13 | 1 | Mgat4a        |
| 7,56E-17 | 0,581391 | 0,359 | 0,201 | 9,36E-13 | 1 | Nrgn          |
| 8,44E-17 | 0,311413 | 0,516 | 0,328 | 1,04E-12 | 1 | Cxcr4         |
| 8,61E-17 | 0,277245 | 0,336 | 0,172 | 1,07E-12 | 1 | Bbx           |
| 9,42E-17 | 0,298557 | 0,283 | 0,133 | 1,17E-12 | 1 | Cobl          |
| 9,59E-17 | 0,25139  | 0,179 | 0,061 | 1,19E-12 | 1 | Fam135a       |
| 1,02E-16 | 0,341936 | 0,865 | 0,754 | 1,26E-12 | 1 | Atp5a1        |
| 1,24E-16 | 0,278446 | 0,361 | 0,19  | 1,54E-12 | 1 | Ddx26b        |
| 1,39E-16 | -0,40714 | 0,5   | 0,654 | 1,72E-12 | 1 | Ddx3x         |
| 1,81E-16 | 0,33889  | 0,454 | 0,274 | 2,24E-12 | 1 | Bid           |
| 1,88E-16 | 0,426086 | 0,716 | 0,546 | 2,33E-12 | 1 | Gna13         |
| 1,91E-16 | -0,45575 | 0,219 | 0,379 | 2,36E-12 | 1 | Rasgrp2       |
| 1,92E-16 | 0,34718  | 0,346 | 0,186 | 2,37E-12 | 1 | Pik3cg        |
| 2,11E-16 | -0,5447  | 0,425 | 0,567 | 2,61E-12 | 1 | Pyhin1        |
| 2,35E-16 | -0,42777 | 0,777 | 0,834 | 2,9E-12  | 1 | Ctss          |
| 2,37E-16 | -0,33328 | 0,189 | 0,365 | 2,94E-12 | 1 | Gmfg          |
| 2,84E-16 | 0,285558 | 0,976 | 0,967 | 3,51E-12 | 1 | Rac2          |
| 3,28E-16 | 0,292505 | 0,642 | 0,445 | 4,06E-12 | 1 | Shfm1         |
| 4,45E-16 | -0,31609 | 0,095 | 0,243 | 5,5E-12  | 1 | Sema4b        |
| 4,63E-16 | -0,2624  | 0,083 | 0,228 | 5,73E-12 | 1 | 6030440G07Rik |
| 6,23E-16 | 0,302262 | 0,398 | 0,229 | 7,72E-12 | 1 | Trib2         |
| 6,29E-16 | 0,357854 | 0,525 | 0,346 | 7,79E-12 | 1 | Edem1         |
| 6,62E-16 | 0,344596 | 0,512 | 0,34  | 8,2E-12  | 1 | Aldh2         |
| 8,24E-16 | 0,30653  | 0,53  | 0,355 | 1,02E-11 | 1 | Sfpi1         |
| 8,5E-16  | -0,2844  | 0,033 | 0,152 | 1,05E-11 | 1 | Zmynd11       |
| 9,66E-16 | -0,41092 | 0,398 | 0,568 | 1,2E-11  | 1 | Cd47          |
| 9,78E-16 | 0,276584 | 0,49  | 0,313 | 1,21E-11 | 1 | Dbi           |
| 1,11E-15 | -0,31635 | 0,055 | 0,185 | 1,38E-11 | 1 | Arap2         |
| 1,17E-15 | 0,28179  | 0,868 | 0,718 | 1,45E-11 | 1 | Atp5b         |
| 1,2E-15  | 0,345365 | 0,765 | 0,617 | 1,48E-11 | 1 | Smim14        |
| 1,27E-15 | -0,57738 | 0,97  | 0,97  | 1,57E-11 | 1 | Gm17821       |
| 1,34E-15 | 0,306036 | 0,506 | 0,328 | 1,66E-11 | 1 | Pptc7         |
| 1,43E-15 | -0,30438 | 0,021 | 0,13  | 1,77E-11 | 1 | Fcrl5         |
| 1,43E-15 | -0,52305 | 0,095 | 0,236 | 1,77E-11 | 1 | Ms4a4c        |
| 1,48E-15 | 0,341736 | 0,464 | 0,289 | 1,83E-11 | 1 | Ehd3          |
| 1,66E-15 | 0,268297 | 0,268 | 0,124 | 2,05E-11 | 1 | H1fx          |
| 1,78E-15 | 0,273855 | 0,34  | 0,178 | 2,2E-11  | 1 | Gsn           |
| 2,04E-15 | -0,30217 | 0,973 | 0,983 | 2,52E-11 | 1 | Rpl37a        |
| 2,45E-15 | 0,378285 | 0,584 | 0,426 | 3,03E-11 | 1 | Rftn1         |

|          |          |       |       |          |   |               |
|----------|----------|-------|-------|----------|---|---------------|
| 2,58E-15 | -0,42862 | 0,223 | 0,382 | 3,2E-11  | 1 | Pde4b         |
| 2,64E-15 | 0,373759 | 0,558 | 0,386 | 3,27E-11 | 1 | Akt1          |
| 2,71E-15 | -0,56192 | 0,93  | 0,949 | 3,36E-11 | 1 | A630089N07Rik |
| 2,82E-15 | 0,362443 | 0,703 | 0,573 | 3,49E-11 | 1 | Rhog          |
| 2,91E-15 | 0,294292 | 0,553 | 0,371 | 3,6E-11  | 1 | Fam134b       |
| 3,2E-15  | 0,308613 | 0,621 | 0,433 | 3,96E-11 | 1 | Pgk1          |
| 3,79E-15 | -0,48668 | 0,747 | 0,816 | 4,69E-11 | 1 | Tubb5         |
| 4,1E-15  | 0,298195 | 0,408 | 0,241 | 5,07E-11 | 1 | Akap2         |
| 6,55E-15 | 0,266166 | 0,389 | 0,224 | 8,11E-11 | 1 | Hmgn3         |
| 6,73E-15 | 0,321305 | 0,763 | 0,608 | 8,34E-11 | 1 | Eif3h         |
| 7,82E-15 | -0,52498 | 0,919 | 0,957 | 9,68E-11 | 1 | Ptma          |
| 9,5E-15  | -0,3908  | 0,195 | 0,35  | 1,18E-10 | 1 | Gimap7        |
| 9,64E-15 | -0,41086 | 0,274 | 0,424 | 1,19E-10 | 1 | Ppp3ca        |
| 9,66E-15 | -0,32167 | 0,132 | 0,281 | 1,2E-10  | 1 | Clec2g        |
| 9,69E-15 | -0,30232 | 0,111 | 0,256 | 1,2E-10  | 1 | Phf1          |
| 9,93E-15 | 0,317443 | 0,513 | 0,348 | 1,23E-10 | 1 | Tpd52         |
| 1,09E-14 | 0,310653 | 0,72  | 0,562 | 1,35E-10 | 1 | Map4k1        |
| 1,15E-14 | 0,294481 | 0,571 | 0,395 | 1,42E-10 | 1 | Coro1b        |
| 1,21E-14 | 0,365845 | 0,472 | 0,31  | 1,49E-10 | 1 | Rraga         |
| 1,38E-14 | 0,314917 | 0,672 | 0,505 | 1,71E-10 | 1 | Psmb7         |
| 1,44E-14 | 0,300902 | 0,648 | 0,478 | 1,78E-10 | 1 | Pik3c2b       |
| 1,51E-14 | 0,306863 | 0,669 | 0,531 | 1,87E-10 | 1 | Oaz1          |
| 1,52E-14 | -0,27217 | 0,996 | 0,998 | 1,89E-10 | 1 | Ddx5          |
| 1,55E-14 | -0,36726 | 0,263 | 0,422 | 1,92E-10 | 1 | Mllt6         |
| 1,58E-14 | 0,306489 | 0,439 | 0,272 | 1,96E-10 | 1 | Stap1         |
| 1,6E-14  | -0,42531 | 0,592 | 0,721 | 1,98E-10 | 1 | Fam111a       |
| 1,91E-14 | 0,25884  | 0,322 | 0,171 | 2,36E-10 | 1 | Ralgds        |
| 2,04E-14 | -0,37727 | 0,152 | 0,303 | 2,52E-10 | 1 | Pecam1        |
| 2,16E-14 | 0,28551  | 0,488 | 0,316 | 2,68E-10 | 1 | Ktn1          |
| 2,19E-14 | 0,300125 | 0,432 | 0,273 | 2,71E-10 | 1 | Rnf19b        |
| 2,34E-14 | -0,45379 | 0,429 | 0,568 | 2,89E-10 | 1 | Flna          |
| 2,93E-14 | 0,302698 | 0,777 | 0,623 | 3,62E-10 | 1 | Purb          |
| 2,93E-14 | -0,38447 | 0,568 | 0,699 | 3,63E-10 | 1 | Ifi30         |
| 2,95E-14 | 0,326833 | 0,504 | 0,329 | 3,65E-10 | 1 | Pnp           |
| 3,03E-14 | 0,302683 | 0,673 | 0,512 | 3,75E-10 | 1 | Lat2          |
| 3,2E-14  | 0,324066 | 0,609 | 0,446 | 3,97E-10 | 1 | Syngn2        |
| 3,93E-14 | -0,30071 | 0,93  | 0,956 | 4,87E-10 | 1 | Rpl36a        |
| 4,16E-14 | 0,282776 | 0,951 | 0,904 | 5,15E-10 | 1 | Rbm3          |
| 4,62E-14 | -0,5039  | 0,429 | 0,57  | 5,72E-10 | 1 | Foxp1         |
| 4,94E-14 | 0,267913 | 0,497 | 0,313 | 6,11E-10 | 1 | 2700029M09Rik |
| 5,31E-14 | -0,33347 | 0,071 | 0,2   | 6,58E-10 | 1 | A630033H20Rik |
| 5,78E-14 | 0,286589 | 0,787 | 0,629 | 7,15E-10 | 1 | Atp5c1        |
| 5,99E-14 | -0,30387 | 0,118 | 0,259 | 7,42E-10 | 1 | Tle3          |
| 6,53E-14 | 0,329743 | 0,596 | 0,43  | 8,09E-10 | 1 | Fermt3        |
| 8,08E-14 | -0,38479 | 0,661 | 0,759 | 1E-09    | 1 | Iqgap1        |
| 1,09E-13 | 0,304836 | 0,476 | 0,31  | 1,35E-09 | 1 | Tmem64        |
| 1,1E-13  | 0,317254 | 0,571 | 0,388 | 1,36E-09 | 1 | Psip1         |
| 1,1E-13  | 0,330525 | 0,624 | 0,456 | 1,36E-09 | 1 | Lsm14a        |
| 1,39E-13 | -0,28659 | 0,099 | 0,234 | 1,72E-09 | 1 | Cyfip1        |
| 1,43E-13 | 0,310473 | 0,757 | 0,61  | 1,77E-09 | 1 | Cox6c         |

|          |          |       |       |          |   |               |
|----------|----------|-------|-------|----------|---|---------------|
| 1,62E-13 | 0,294064 | 0,393 | 0,239 | 2E-09    | 1 | Eif2a         |
| 1,72E-13 | 0,305778 | 0,629 | 0,464 | 2,13E-09 | 1 | Nedd8         |
| 1,75E-13 | 0,28964  | 0,552 | 0,385 | 2,16E-09 | 1 | Cmpk1         |
| 1,98E-13 | -0,26087 | 0,087 | 0,217 | 2,45E-09 | 1 | Casp4         |
| 2,1E-13  | -0,27543 | 0,09  | 0,219 | 2,6E-09  | 1 | Gm2a          |
| 2,24E-13 | 0,282055 | 0,459 | 0,295 | 2,77E-09 | 1 | Ublcp1        |
| 2,27E-13 | -0,7089  | 0,735 | 0,783 | 2,82E-09 | 1 | Tuba1b        |
| 2,31E-13 | 0,32488  | 0,604 | 0,436 | 2,86E-09 | 1 | Srpk3         |
| 2,31E-13 | 0,26032  | 0,337 | 0,187 | 2,86E-09 | 1 | Slamf7        |
| 2,34E-13 | 0,29054  | 0,42  | 0,264 | 2,89E-09 | 1 | Naa40         |
| 2,6E-13  | -0,35765 | 0,214 | 0,36  | 3,22E-09 | 1 | Malt1         |
| 2,78E-13 | -0,45768 | 0,296 | 0,439 | 3,44E-09 | 1 | Gns           |
| 2,82E-13 | 0,286313 | 0,393 | 0,24  | 3,49E-09 | 1 | Scai          |
| 2,9E-13  | -0,36573 | 0,488 | 0,631 | 3,59E-09 | 1 | Mat2a         |
| 2,9E-13  | 0,274102 | 0,484 | 0,32  | 3,59E-09 | 1 | Ube2n         |
| 3,01E-13 | -0,25784 | 0,089 | 0,219 | 3,73E-09 | 1 | S1pr4         |
| 3,07E-13 | 0,258441 | 0,206 | 0,091 | 3,8E-09  | 1 | H1f0          |
| 3,34E-13 | 0,27775  | 0,426 | 0,271 | 4,13E-09 | 1 | Cbx4          |
| 3,71E-13 | -0,43109 | 0,309 | 0,453 | 4,59E-09 | 1 | Mylip         |
| 4,06E-13 | -0,36561 | 0,536 | 0,656 | 5,03E-09 | 1 | Gimap1        |
| 4,84E-13 | -0,27274 | 0,068 | 0,189 | 6E-09    | 1 | Irf4          |
| 4,92E-13 | -0,3673  | 0,825 | 0,872 | 6,1E-09  | 1 | D4Wsu53e      |
| 5,58E-13 | 0,274036 | 0,541 | 0,379 | 6,91E-09 | 1 | Pomp          |
| 7,01E-13 | 0,288543 | 0,586 | 0,422 | 8,68E-09 | 1 | 2410006H16Rik |
| 1,04E-12 | 0,284069 | 0,518 | 0,356 | 1,29E-08 | 1 | Gabarapl2     |
| 1,09E-12 | 0,252298 | 0,425 | 0,266 | 1,35E-08 | 1 | Sidt2         |
| 1,15E-12 | -0,32165 | 0,24  | 0,385 | 1,43E-08 | 1 | Rabac1        |
| 1,15E-12 | 0,263313 | 0,485 | 0,321 | 1,43E-08 | 1 | Sdhb          |
| 1,21E-12 | -0,31625 | 0,123 | 0,254 | 1,5E-08  | 1 | Tcp11l2       |
| 1,3E-12  | 0,260421 | 0,38  | 0,23  | 1,61E-08 | 1 | Sdhaf2        |
| 1,36E-12 | 0,273877 | 0,834 | 0,698 | 1,68E-08 | 1 | Serf2         |
| 1,53E-12 | -0,39457 | 0,714 | 0,795 | 1,89E-08 | 1 | Prkcb         |
| 1,65E-12 | -0,32718 | 0,18  | 0,323 | 2,04E-08 | 1 | Tagln2        |
| 2,02E-12 | 0,253548 | 0,34  | 0,198 | 2,5E-08  | 1 | Nxpe2         |
| 2,06E-12 | -0,42877 | 0,291 | 0,432 | 2,55E-08 | 1 | Cbfa2t3       |
| 2,15E-12 | 0,257325 | 0,296 | 0,165 | 2,66E-08 | 1 | Pqlc3         |
| 2,19E-12 | 0,261303 | 0,337 | 0,198 | 2,71E-08 | 1 | Mprip         |
| 2,66E-12 | 0,260768 | 0,55  | 0,388 | 3,3E-08  | 1 | Ube2k         |
| 2,78E-12 | 0,262615 | 0,382 | 0,239 | 3,44E-08 | 1 | Arpc1a        |
| 3,03E-12 | 0,301677 | 0,864 | 0,785 | 3,75E-08 | 1 | Arpc5         |
| 3,12E-12 | 0,299411 | 0,584 | 0,432 | 3,86E-08 | 1 | Hspa4         |
| 3,52E-12 | -0,39455 | 0,555 | 0,659 | 4,36E-08 | 1 | Snx2          |
| 4,01E-12 | 0,295927 | 0,675 | 0,533 | 4,97E-08 | 1 | Mif4gd        |
| 4,02E-12 | -0,33721 | 0,808 | 0,876 | 4,97E-08 | 1 | Eif4a2        |
| 4,1E-12  | -0,43525 | 0,308 | 0,44  | 5,08E-08 | 1 | Trim34a       |
| 4,24E-12 | -0,3721  | 0,241 | 0,385 | 5,25E-08 | 1 | Scd2          |
| 4,32E-12 | -0,25862 | 0,102 | 0,226 | 5,35E-08 | 1 | Tuba4a        |
| 4,96E-12 | 0,276653 | 0,506 | 0,346 | 6,13E-08 | 1 | Ubqln1        |
| 5,22E-12 | 0,27701  | 0,49  | 0,329 | 6,46E-08 | 1 | Il21r         |
| 5,69E-12 | 0,314158 | 0,537 | 0,379 | 7,04E-08 | 1 | Ube2j1        |



|          |          |       |       |          |   |          |
|----------|----------|-------|-------|----------|---|----------|
| 6,14E-12 | 0,350963 | 0,29  | 0,163 | 7,61E-08 | 1 | Eif5a2   |
| 6,9E-12  | 0,27946  | 0,991 | 0,989 | 8,54E-08 | 1 | Cd53     |
| 7,1E-12  | 0,282471 | 0,817 | 0,703 | 8,8E-08  | 1 | Dynll1   |
| 7,27E-12 | -0,35342 | 0,75  | 0,827 | 9E-08    | 1 | Ly86     |
| 8,27E-12 | -0,3454  | 0,172 | 0,305 | 1,02E-07 | 1 | Csnk1g3  |
| 9,34E-12 | 0,30352  | 0,58  | 0,436 | 1,16E-07 | 1 | Parp1    |
| 9,92E-12 | 0,26942  | 0,509 | 0,358 | 1,23E-07 | 1 | Slc25a19 |
| 1,04E-11 | -0,25166 | 0,052 | 0,156 | 1,29E-07 | 1 | Cd72     |
| 1,11E-11 | 0,253899 | 0,544 | 0,398 | 1,37E-07 | 1 | Yeats4   |
| 1,16E-11 | 0,272785 | 0,676 | 0,529 | 1,44E-07 | 1 | Ppp1r16b |
| 1,63E-11 | 0,305627 | 0,525 | 0,376 | 2,02E-07 | 1 | Mapre2   |
| 1,83E-11 | -0,48463 | 0,695 | 0,787 | 2,27E-07 | 1 | Il2rg    |
| 1,89E-11 | 0,262787 | 0,416 | 0,274 | 2,33E-07 | 1 | Cpsf2    |
| 2,11E-11 | -0,57395 | 0,743 | 0,83  | 2,61E-07 | 1 | Grk4     |
| 2,22E-11 | -0,2882  | 0,862 | 0,91  | 2,75E-07 | 1 | Eef1g    |
| 2,43E-11 | -0,45515 | 0,994 | 0,991 | 3,01E-07 | 1 | Kcnq1ot1 |
| 2,66E-11 | 0,254113 | 0,831 | 0,714 | 3,29E-07 | 1 | Btf3     |
| 2,74E-11 | 0,255184 | 0,642 | 0,5   | 3,39E-07 | 1 | Eif3k    |
| 3,61E-11 | -0,27314 | 0,247 | 0,386 | 4,47E-07 | 1 | Cdc42se2 |
| 4,05E-11 | 0,250842 | 0,978 | 0,965 | 5,02E-07 | 1 | Gnai2    |
| 4,15E-11 | 0,307955 | 0,602 | 0,457 | 5,14E-07 | 1 | Cd2ap    |
| 4,45E-11 | 0,271511 | 0,512 | 0,364 | 5,51E-07 | 1 | Cnot2    |
| 5,52E-11 | 0,27637  | 0,643 | 0,497 | 6,84E-07 | 1 | Gga2     |
| 5,53E-11 | 0,312112 | 0,441 | 0,312 | 6,85E-07 | 1 | Sh3bgrl  |
| 5,55E-11 | -0,27288 | 0,917 | 0,945 | 6,87E-07 | 1 | Rpl36    |
| 6,08E-11 | 0,363377 | 0,589 | 0,446 | 7,53E-07 | 1 | Wdr92    |
| 6,72E-11 | 0,258937 | 0,355 | 0,223 | 8,32E-07 | 1 | Slamf1   |
| 7,18E-11 | -0,26496 | 0,158 | 0,289 | 8,89E-07 | 1 | Ugcg     |
| 7,78E-11 | 0,284852 | 0,586 | 0,448 | 9,63E-07 | 1 | Taldo1   |
| 8,35E-11 | -0,27656 | 0,074 | 0,179 | 1,03E-06 | 1 | Trim30b  |
| 8,37E-11 | 0,261701 | 0,645 | 0,505 | 1,04E-06 | 1 | Cotl1    |
| 1,26E-10 | 0,264777 | 0,559 | 0,418 | 1,55E-06 | 1 | Pik3cd   |
| 1,48E-10 | 0,25446  | 0,692 | 0,568 | 1,83E-06 | 1 | Myl12a   |
| 1,63E-10 | -0,36587 | 0,169 | 0,288 | 2,01E-06 | 1 | Irf1     |
| 1,78E-10 | -0,30421 | 0,297 | 0,428 | 2,2E-06  | 1 | Sptbn1   |
| 1,95E-10 | -0,29473 | 0,669 | 0,745 | 2,41E-06 | 1 | Gm9846   |
| 2,06E-10 | -0,2531  | 0,855 | 0,891 | 2,55E-06 | 1 | Rpl14    |
| 2,14E-10 | 0,261133 | 0,53  | 0,394 | 2,65E-06 | 1 | Hip1r    |
| 2,19E-10 | -0,37604 | 0,315 | 0,425 | 2,71E-06 | 1 | Chd7     |
| 2,48E-10 | -0,30741 | 0,401 | 0,512 | 3,07E-06 | 1 | Acap1    |
| 2,48E-10 | 0,323388 | 0,624 | 0,493 | 3,07E-06 | 1 | Cs       |
| 2,76E-10 | -0,28463 | 0,179 | 0,306 | 3,42E-06 | 1 | Ifngr2   |
| 3,15E-10 | 0,283692 | 0,556 | 0,428 | 3,9E-06  | 1 | Tspan13  |
| 3,69E-10 | -0,27772 | 0,172 | 0,292 | 4,56E-06 | 1 | Clec2d   |
| 4,33E-10 | 0,289257 | 0,737 | 0,635 | 5,36E-06 | 1 | Cox6a1   |
| 4,66E-10 | 0,262657 | 0,849 | 0,741 | 5,77E-06 | 1 | Tma7     |
| 5,42E-10 | 0,275326 | 0,641 | 0,51  | 6,72E-06 | 1 | St6gal1  |
| 6,15E-10 | 0,262026 | 0,41  | 0,279 | 7,61E-06 | 1 | Lrch1    |
| 9,03E-10 | 0,261048 | 0,451 | 0,313 | 1,12E-05 | 1 | Anapc16  |
| 9,52E-10 | -0,31477 | 0,044 | 0,129 | 1,18E-05 | 1 | Ccna2    |

|          |          |       |       |          |   |               |
|----------|----------|-------|-------|----------|---|---------------|
| 9,67E-10 | 0,255343 | 0,732 | 0,624 | 1,2E-05  | 1 | Syk           |
| 1,29E-09 | 0,250457 | 0,478 | 0,34  | 1,6E-05  | 1 | Vdac3         |
| 1,41E-09 | 0,268327 | 0,575 | 0,431 | 1,75E-05 | 1 | Cd86          |
| 1,73E-09 | 0,268115 | 0,438 | 0,303 | 2,14E-05 | 1 | Zfp710        |
| 1,96E-09 | -0,3363  | 0,324 | 0,435 | 2,43E-05 | 1 | Rasa3         |
| 2,23E-09 | 0,255991 | 0,79  | 0,694 | 2,76E-05 | 1 | Tecr          |
| 2,6E-09  | -0,3595  | 0,296 | 0,403 | 3,22E-05 | 1 | Cytip         |
| 2,99E-09 | 0,253331 | 0,679 | 0,566 | 3,71E-05 | 1 | Prkcd         |
| 3,66E-09 | -0,30399 | 0,216 | 0,331 | 4,53E-05 | 1 | Jhdm1d        |
| 4,25E-09 | -0,30109 | 0,257 | 0,372 | 5,26E-05 | 1 | Zmym5         |
| 5,03E-09 | -0,37951 | 0,558 | 0,638 | 6,22E-05 | 1 | Mll5          |
| 5,06E-09 | -0,33289 | 0,88  | 0,894 | 6,27E-05 | 1 | Zfp3611       |
| 5,71E-09 | -0,25353 | 0,118 | 0,222 | 7,07E-05 | 1 | Morc3         |
| 9,24E-09 | -0,5711  | 0,467 | 0,548 | 0,000114 | 1 | Stat1         |
| 9,8E-09  | -0,25964 | 0,061 | 0,146 | 0,000121 | 1 | Osbpl5        |
| 1,07E-08 | -0,33473 | 0,676 | 0,712 | 0,000132 | 1 | Smg1          |
| 1,56E-08 | -0,27369 | 0,188 | 0,296 | 0,000193 | 1 | Smarca2       |
| 1,63E-08 | 0,250746 | 0,66  | 0,542 | 0,000202 | 1 | Mdh1          |
| 2,02E-08 | -0,27032 | 0,18  | 0,287 | 0,000251 | 1 | Aff3          |
| 2,74E-08 | -0,30181 | 0,469 | 0,565 | 0,00034  | 1 | Wdfy4         |
| 3,41E-08 | -0,30459 | 0,229 | 0,334 | 0,000423 | 1 | 4930523C07Rik |
| 3,48E-08 | -0,27031 | 0,222 | 0,33  | 0,00043  | 1 | Tmem173       |
| 4,19E-08 | 0,257789 | 0,806 | 0,721 | 0,000518 | 1 | Sp110         |
| 4,26E-08 | -0,25266 | 0,047 | 0,123 | 0,000527 | 1 | Nr1d2         |
| 5,15E-08 | -0,33013 | 0,584 | 0,667 | 0,000637 | 1 | Lbh           |
| 7,06E-08 | -0,29573 | 0,348 | 0,456 | 0,000874 | 1 | Mll3          |
| 7,65E-08 | 0,277223 | 0,524 | 0,411 | 0,000947 | 1 | Dync1i2       |
| 1,08E-07 | -0,27783 | 0,096 | 0,183 | 0,001337 | 1 | Slfn8         |
| 1,2E-07  | -0,27913 | 0,512 | 0,596 | 0,001485 | 1 | Napsa         |
| 1,56E-07 | -0,42808 | 0,379 | 0,479 | 0,001935 | 1 | Ifi47         |
| 1,56E-07 | 0,25675  | 0,54  | 0,436 | 0,001937 | 1 | Uvrug         |
| 1,62E-07 | -0,35797 | 0,852 | 0,894 | 0,00201  | 1 | Mir5109       |
| 2,12E-07 | -0,29097 | 0,633 | 0,708 | 0,002631 | 1 | Srrm2         |
| 2,39E-07 | -0,50908 | 0,59  | 0,684 | 0,002953 | 1 | Vmn2r55       |
| 2,65E-07 | 0,264473 | 0,518 | 0,397 | 0,003286 | 1 | Prkacb        |
| 2,91E-07 | -0,49138 | 0,605 | 0,644 | 0,003607 | 1 | Fcer2a        |
| 2,99E-07 | -0,34232 | 0,408 | 0,493 | 0,003706 | 1 | Tlr1          |
| 3,03E-07 | 0,259854 | 0,537 | 0,432 | 0,003749 | 1 | Max           |
| 3,26E-07 | -0,65889 | 0,175 | 0,255 | 0,004036 | 1 | 2810417H13Rik |
| 6,08E-07 | -0,27767 | 0,487 | 0,57  | 0,00753  | 1 | Sec11c        |
| 6,09E-07 | -0,26028 | 0,192 | 0,285 | 0,007537 | 1 | Mdn1          |
| 6,2E-07  | -0,278   | 0,287 | 0,378 | 0,007677 | 1 | Mtdh          |
| 1E-06    | -0,27753 | 0,291 | 0,387 | 0,012392 | 1 | Ankrd44       |
| 1,45E-06 | -0,32827 | 0,191 | 0,28  | 0,017952 | 1 | Gbp4          |
| 1,77E-06 | 0,287757 | 0,286 | 0,195 | 0,021887 | 1 | Slpi          |
| 1,97E-06 | -0,27463 | 0,293 | 0,38  | 0,024379 | 1 | Klf13         |
| 2,29E-06 | -0,2514  | 0,528 | 0,597 | 0,028328 | 1 | Tapbp         |
| 3,28E-06 | -0,26201 | 0,275 | 0,365 | 0,040607 | 1 | Zfp217        |
| 3,43E-06 | -0,33559 | 0,734 | 0,784 | 0,042495 | 1 | Btla          |
| 4,02E-06 | -0,28078 | 0,689 | 0,761 | 0,049744 | 1 | Cybb          |

|          |          |       |       |          |     |               |
|----------|----------|-------|-------|----------|-----|---------------|
| 5,73E-06 | -0,28089 | 0,163 | 0,24  | 0,07094  | 1   | Rrm1          |
| 1,14E-05 | -0,25377 | 0,538 | 0,616 | 0,141477 | 1   | Nme2          |
| 3,01E-05 | -0,25674 | 0,361 | 0,432 | 0,372587 | 1   | Ragef6        |
| 3,65E-05 | -0,28394 | 0,439 | 0,506 | 0,451745 | 1   | Abca1         |
| 3,9E-05  | -0,25218 | 0,364 | 0,439 | 0,482971 | 1   | Stk24         |
| 5,08E-05 | -0,25827 | 0,812 | 0,822 | 0,629389 | 1   | Hsp90aa1      |
| 6,66E-05 | -0,30086 | 0,308 | 0,382 | 0,824391 | 1   | Abhd17b       |
| 8,15E-05 | -0,38186 | 0,519 | 0,576 |          | 1 1 | Gm10785       |
| 8,8E-05  | -0,3005  | 0,405 | 0,47  |          | 1 1 | Nfkb1         |
| 0,000109 | -0,34761 | 0,42  | 0,484 |          | 1 1 | A130077B15Rik |
| 0,000135 | -0,25295 | 0,456 | 0,512 |          | 1 1 | Tmpo          |
| 0,000439 | -0,27721 | 0,303 | 0,369 |          | 1 1 | Nfatc1        |
| 0,002344 | -0,35099 | 0,172 | 0,215 |          | 1 1 | Rrm2          |
| 9,5E-153 | 2,085635 | 0,82  | 0,143 | 1,2E-148 | 2   | 2810417H13Rik |
| 7,2E-137 | 1,527705 | 0,833 | 0,16  | 9E-133   | 2   | Mcm5          |
| 2E-124   | 1,130054 | 0,657 | 0,089 | 2,5E-120 | 2   | Uhrf1         |
| 4,4E-120 | 0,957762 | 0,584 | 0,063 | 5,4E-116 | 2   | Tcf19         |
| 8,8E-120 | 1,179277 | 0,796 | 0,158 | 1,1E-115 | 2   | Mcm3          |
| 1,5E-114 | 1,784441 | 0,8   | 0,197 | 1,8E-110 | 2   | Top2a         |
| 1,2E-110 | 2,241904 | 0,959 | 0,563 | 1,5E-106 | 2   | Pcna          |
| 5,6E-110 | 1,789567 | 0,906 | 0,308 | 7E-106   | 2   | Stmn1         |
| 7,7E-109 | 1,184605 | 0,682 | 0,119 | 9,5E-105 | 2   | Dhfr          |
| 1,6E-107 | 1,498385 | 0,686 | 0,131 | 1,9E-103 | 2   | Rrm2          |
| 1,2E-103 | 0,83423  | 0,612 | 0,086 | 1,5E-99  | 2   | Hells         |
| 1,6E-103 | 1,140532 | 0,686 | 0,128 | 1,9E-99  | 2   | Lig1          |
| 3,9E-103 | 0,551959 | 0,343 | 0,012 | 4,8E-99  | 2   | E2f8          |
| 9,2E-102 | 1,501894 | 1     | 0,936 | 1,14E-97 | 2   | Ptma          |
| 7,4E-101 | 1,079291 | 0,755 | 0,171 | 9,21E-97 | 2   | Dut           |
| 2,3E-100 | 1,027192 | 0,673 | 0,125 | 2,81E-96 | 2   | Cdca7         |
| 3,4E-99  | 1,837016 | 0,98  | 0,638 | 4,18E-95 | 2   | H2afz         |
| 3,5E-99  | 0,521557 | 0,327 | 0,011 | 4,38E-95 | 2   | Kntc1         |
| 1,92E-98 | 0,624174 | 0,437 | 0,036 | 2,38E-94 | 2   | Cdc45         |
| 4,68E-98 | 1,013028 | 0,747 | 0,168 | 5,79E-94 | 2   | Mcm2          |
| 6,52E-97 | 1,568766 | 0,873 | 0,326 | 8,07E-93 | 2   | Mcm6          |
| 2,86E-93 | 1,220828 | 0,743 | 0,185 | 3,55E-89 | 2   | Asf1b         |
| 6,58E-91 | 1,084496 | 0,714 | 0,168 | 8,14E-87 | 2   | Mcm4          |
| 9,34E-91 | 1,611648 | 0,902 | 0,398 | 1,16E-86 | 2   | Hmgb2         |
| 1,25E-90 | 1,801265 | 0,967 | 0,738 | 1,55E-86 | 2   | Tuba1b        |
| 2,71E-90 | 0,654119 | 0,461 | 0,05  | 3,35E-86 | 2   | Mybl2         |
| 4,06E-90 | 0,583114 | 0,38  | 0,027 | 5,03E-86 | 2   | Rad51         |
| 2,56E-88 | 1,082462 | 0,665 | 0,149 | 3,17E-84 | 2   | Rrm1          |
| 3,35E-88 | 0,469651 | 0,314 | 0,014 | 4,15E-84 | 2   | Rad51ap1      |
| 2,57E-87 | 1,314371 | 0,976 | 0,58  | 3,18E-83 | 2   | Ran           |
| 7,17E-87 | 0,529274 | 0,4   | 0,034 | 8,87E-83 | 2   | Chaf1a        |
| 5,34E-85 | 0,531502 | 0,339 | 0,021 | 6,61E-81 | 2   | Cdc6          |
| 8,77E-85 | 0,577281 | 0,31  | 0,015 | 1,09E-80 | 2   | Esco2         |
| 4,3E-84  | 1,186947 | 0,8   | 0,264 | 5,32E-80 | 2   | Mcm7          |
| 2,79E-83 | 0,79883  | 0,604 | 0,112 | 3,46E-79 | 2   | Fen1          |
| 1,55E-81 | 1,603438 | 0,767 | 0,25  | 1,92E-77 | 2   | Mki67         |
| 2,98E-81 | 0,891585 | 0,457 | 0,06  | 3,69E-77 | 2   | Clspn         |

|          |          |       |       |          |   |               |
|----------|----------|-------|-------|----------|---|---------------|
| 2,15E-80 | 0,944315 | 0,633 | 0,136 | 2,67E-76 | 2 | Prim1         |
| 1,13E-79 | 0,728175 | 0,543 | 0,093 | 1,4E-75  | 2 | Gmnn          |
| 1,07E-78 | 0,598469 | 0,355 | 0,03  | 1,32E-74 | 2 | Ncapg2        |
| 1,21E-78 | 0,673877 | 0,437 | 0,053 | 1,49E-74 | 2 | Atad5         |
| 1,08E-76 | 0,465526 | 0,302 | 0,018 | 1,33E-72 | 2 | Mcm10         |
| 3,48E-75 | 0,818119 | 0,465 | 0,069 | 4,31E-71 | 2 | Cdk1          |
| 5,08E-75 | 0,532382 | 0,359 | 0,033 | 6,29E-71 | 2 | Chek1         |
| 1,28E-74 | 0,695723 | 0,588 | 0,116 | 1,59E-70 | 2 | Tipin         |
| 3,35E-73 | 0,82408  | 0,42  | 0,054 | 4,15E-69 | 2 | Ccna2         |
| 4,86E-73 | 0,736384 | 0,502 | 0,085 | 6,02E-69 | 2 | Dtl           |
| 2,01E-72 | 0,591445 | 0,367 | 0,038 | 2,49E-68 | 2 | Brca1         |
| 6,44E-71 | 0,595192 | 0,437 | 0,061 | 7,97E-67 | 2 | Figl1         |
| 1,2E-69  | 0,556556 | 0,408 | 0,054 | 1,49E-65 | 2 | Orc6          |
| 2,43E-69 | 1,18135  | 0,955 | 0,682 | 3,01E-65 | 2 | Hnrnpab       |
| 4,31E-68 | 0,58534  | 0,416 | 0,058 | 5,34E-64 | 2 | Pole          |
| 1,06E-67 | 1,06471  | 0,808 | 0,32  | 1,31E-63 | 2 | Slbp          |
| 1,64E-67 | 0,643367 | 0,441 | 0,068 | 2,03E-63 | 2 | Ncaph         |
| 3,04E-67 | 0,467786 | 0,367 | 0,042 | 3,77E-63 | 2 | Rfc4          |
| 2,13E-65 | 0,43118  | 0,282 | 0,02  | 2,64E-61 | 2 | Cenpk         |
| 4,62E-64 | 1,098987 | 0,967 | 0,705 | 5,73E-60 | 2 | Hmgn2         |
| 1,38E-63 | 0,94994  | 0,747 | 0,259 | 1,71E-59 | 2 | Dnmt1         |
| 1,83E-63 | 0,710937 | 0,555 | 0,125 | 2,27E-59 | 2 | Rpa2          |
| 2,84E-63 | 0,953579 | 0,882 | 0,451 | 3,51E-59 | 2 | Rbbp7         |
| 6,89E-63 | 0,569176 | 0,38  | 0,051 | 8,52E-59 | 2 | Spc24         |
| 1,36E-62 | 0,393722 | 0,233 | 0,012 | 1,69E-58 | 2 | Pbk           |
| 2,32E-62 | -1,58134 | 0,861 | 0,988 | 2,87E-58 | 2 | Malat1        |
| 3,32E-60 | 0,883675 | 0,984 | 0,903 | 4,12E-56 | 2 | Ppia          |
| 1,34E-59 | 0,747376 | 0,645 | 0,187 | 1,66E-55 | 2 | Nasp          |
| 1,69E-59 | 0,790889 | 0,653 | 0,197 | 2,09E-55 | 2 | Hat1          |
| 3,4E-59  | 0,493517 | 0,335 | 0,041 | 4,21E-55 | 2 | Tyms          |
| 1,39E-57 | 1,057153 | 0,955 | 0,774 | 1,72E-53 | 2 | Hmgb1         |
| 1,06E-56 | 1,140015 | 0,947 | 0,77  | 1,32E-52 | 2 | Tubb5         |
| 1,7E-56  | 0,56527  | 0,437 | 0,081 | 2,11E-52 | 2 | Pola1         |
| 1,81E-56 | 0,715657 | 0,629 | 0,184 | 2,24E-52 | 2 | Ranbp1        |
| 1,02E-55 | 0,977935 | 0,882 | 0,437 | 1,26E-51 | 2 | Tmpo          |
| 3,26E-55 | 0,8921   | 0,771 | 0,32  | 4,03E-51 | 2 | 2700029M09Rik |
| 9,02E-55 | 0,558674 | 0,4   | 0,066 | 1,12E-50 | 2 | Cdca3         |
| 1,07E-54 | 0,717859 | 0,588 | 0,162 | 1,32E-50 | 2 | Ezh2          |
| 2,04E-54 | 0,486322 | 0,347 | 0,049 | 2,53E-50 | 2 | Plk4          |
| 1,28E-53 | 0,650143 | 0,392 | 0,069 | 1,58E-49 | 2 | Stil          |
| 6,31E-53 | 0,612577 | 0,457 | 0,097 | 7,82E-49 | 2 | Tacc3         |
| 8,81E-53 | 0,547963 | 0,257 | 0,024 | 1,09E-48 | 2 | Neil3         |
| 2,01E-52 | 0,738505 | 0,506 | 0,125 | 2,49E-48 | 2 | Nmral1        |
| 1,21E-51 | 0,849491 | 0,751 | 0,299 | 1,5E-47  | 2 | Snrpd1        |
| 3,01E-51 | 0,302382 | 0,204 | 0,012 | 3,73E-47 | 2 | Rad54l        |
| 4,24E-51 | 0,901423 | 0,955 | 0,747 | 5,25E-47 | 2 | Gapdh         |
| 7,58E-51 | -1,48375 | 0,576 | 0,865 | 9,38E-47 | 2 | Shisa5        |
| 8,34E-51 | 0,44807  | 0,294 | 0,036 | 1,03E-46 | 2 | Cdca2         |
| 1,11E-50 | 0,323278 | 0,2   | 0,012 | 1,38E-46 | 2 | Cdca5         |
| 2,06E-50 | 0,466418 | 0,318 | 0,044 | 2,55E-46 | 2 | Kif15         |

|          |          |       |       |          |   |          |
|----------|----------|-------|-------|----------|---|----------|
| 2,51E-50 | 0,480693 | 0,294 | 0,037 | 3,1E-46  | 2 | Cenph    |
| 3,08E-50 | 0,931067 | 0,873 | 0,388 | 3,81E-46 | 2 | Rgs13    |
| 3,56E-50 | 0,589678 | 0,416 | 0,084 | 4,4E-46  | 2 | Gins1    |
| 8,07E-50 | 0,651759 | 0,563 | 0,159 | 9,99E-46 | 2 | Rfc3     |
| 8,78E-50 | 0,307905 | 0,216 | 0,016 | 1,09E-45 | 2 | Exo1     |
| 9,04E-50 | 0,368004 | 0,286 | 0,034 | 1,12E-45 | 2 | Gins2    |
| 1,02E-49 | 0,591997 | 0,371 | 0,066 | 1,27E-45 | 2 | Fbxo5    |
| 2,9E-49  | 0,345886 | 0,204 | 0,013 | 3,59E-45 | 2 | Mxd3     |
| 9,04E-49 | 0,887284 | 0,951 | 0,659 | 1,12E-44 | 2 | Txn1     |
| 2,56E-48 | 0,813986 | 0,865 | 0,458 | 3,17E-44 | 2 | Erh      |
| 8,78E-48 | 0,745799 | 0,71  | 0,274 | 1,09E-43 | 2 | Topbp1   |
| 1,18E-47 | 0,746452 | 0,735 | 0,287 | 1,46E-43 | 2 | Dnajc9   |
| 1,39E-47 | 0,257051 | 0,167 | 0,007 | 1,72E-43 | 2 | E2f7     |
| 2,31E-47 | 0,898964 | 0,976 | 0,666 | 2,86E-43 | 2 | Basp1    |
| 3,46E-47 | 0,881284 | 0,959 | 0,798 | 4,28E-43 | 2 | Hsp90aa1 |
| 4E-47    | 0,830974 | 0,963 | 0,75  | 4,95E-43 | 2 | Srsf2    |
| 8,95E-47 | 0,412865 | 0,388 | 0,075 | 1,11E-42 | 2 | Siva1    |
| 1,18E-46 | 0,672632 | 0,694 | 0,263 | 1,47E-42 | 2 | Cbx5     |
| 5,04E-46 | 0,451775 | 0,335 | 0,056 | 6,24E-42 | 2 | Ncapg    |
| 6,78E-46 | 0,767668 | 0,678 | 0,262 | 8,39E-42 | 2 | Whsc1    |
| 1,81E-45 | 0,702021 | 0,588 | 0,189 | 2,24E-41 | 2 | Tk1      |
| 2,63E-45 | -1,23366 | 0,555 | 0,861 | 3,25E-41 | 2 | Macf1    |
| 4,33E-45 | 0,392133 | 0,29  | 0,041 | 5,35E-41 | 2 | Cenpn    |
| 5,26E-45 | -1,13906 | 0,894 | 0,981 | 6,51E-41 | 2 | Gm17821  |
| 7,39E-45 | 0,728993 | 0,604 | 0,2   | 9,15E-41 | 2 | Psat1    |
| 1,59E-44 | 0,905355 | 0,91  | 0,586 | 1,97E-40 | 2 | Ldha     |
| 1,79E-44 | 0,522561 | 0,335 | 0,059 | 2,21E-40 | 2 | Aurkb    |
| 3,03E-44 | -1,63829 | 0,073 | 0,56  | 3,75E-40 | 2 | Mndal    |
| 1,76E-43 | -1,01156 | 0,518 | 0,854 | 2,18E-39 | 2 | Btg1     |
| 7,57E-43 | 0,752862 | 0,996 | 0,97  | 9,37E-39 | 2 | Hspa8    |
| 1,11E-42 | 0,511032 | 0,314 | 0,054 | 1,38E-38 | 2 | Kif11    |
| 1,82E-42 | 0,73685  | 0,829 | 0,44  | 2,25E-38 | 2 | Cbx3     |
| 2,39E-42 | 0,643699 | 0,469 | 0,128 | 2,96E-38 | 2 | Gatm     |
| 9,65E-42 | 0,781355 | 0,551 | 0,185 | 1,19E-37 | 2 | Ncapd2   |
| 1,1E-41  | 0,511111 | 0,445 | 0,114 | 1,36E-37 | 2 | Paxip1   |
| 1,2E-41  | 0,419011 | 0,363 | 0,074 | 1,48E-37 | 2 | Wdhd1    |
| 1,34E-41 | 0,85968  | 0,759 | 0,392 | 1,66E-37 | 2 | Pa2g4    |
| 1,62E-41 | 1,093553 | 0,788 | 0,456 | 2E-37    | 2 | Mif      |
| 2,19E-41 | 0,754486 | 0,935 | 0,666 | 2,71E-37 | 2 | Sumo2    |
| 4,45E-41 | 0,386102 | 0,367 | 0,075 | 5,51E-37 | 2 | Rfc5     |
| 4,71E-41 | 0,568742 | 0,294 | 0,05  | 5,83E-37 | 2 | Spc25    |
| 1,6E-40  | 0,42323  | 0,286 | 0,045 | 1,98E-36 | 2 | Slc43a3  |
| 1,7E-40  | 0,87525  | 0,853 | 0,482 | 2,1E-36  | 2 | Marcksl1 |
| 1,76E-40 | 0,623607 | 1     | 0,999 | 2,17E-36 | 2 | Cfl1     |
| 2,29E-40 | 0,327503 | 0,224 | 0,026 | 2,83E-36 | 2 | Sgol1    |
| 2,56E-40 | 0,765656 | 0,71  | 0,33  | 3,17E-36 | 2 | Cdk4     |
| 3,93E-40 | 0,470736 | 0,327 | 0,063 | 4,87E-36 | 2 | Ung      |
| 4,72E-40 | -0,96638 | 0,959 | 0,997 | 5,85E-36 | 2 | Kcnq1ot1 |
| 1,23E-39 | 0,350809 | 0,249 | 0,034 | 1,53E-35 | 2 | Bard1    |
| 1,24E-39 | 0,56356  | 0,371 | 0,084 | 1,53E-35 | 2 | Incenp   |

|          |          |       |       |          |   |               |
|----------|----------|-------|-------|----------|---|---------------|
| 1,67E-39 | 0,767632 | 0,722 | 0,336 | 2,07E-35 | 2 | Tpi1          |
| 2,33E-39 | 0,442925 | 0,392 | 0,092 | 2,88E-35 | 2 | Nup85         |
| 3,99E-39 | 0,455399 | 0,388 | 0,091 | 4,94E-35 | 2 | E2f1          |
| 4,58E-39 | -1,45852 | 0,216 | 0,631 | 5,68E-35 | 2 | Cmah          |
| 4,75E-39 | 0,367546 | 0,261 | 0,039 | 5,89E-35 | 2 | Timeless      |
| 5,54E-39 | -0,85995 | 0,967 | 0,992 | 6,86E-35 | 2 | H2-D1         |
| 6,08E-39 | 0,638185 | 0,539 | 0,174 | 7,53E-35 | 2 | Cks2          |
| 7,41E-39 | 0,517087 | 0,359 | 0,079 | 9,17E-35 | 2 | Pole2         |
| 9,13E-39 | -1,39355 | 0,143 | 0,584 | 1,13E-34 | 2 | Ly6d          |
| 2,36E-38 | 0,695988 | 0,518 | 0,174 | 2,92E-34 | 2 | Mad2l1        |
| 2,43E-38 | 0,507218 | 0,498 | 0,151 | 3,01E-34 | 2 | Cdk2          |
| 1,96E-37 | 0,739521 | 0,967 | 0,764 | 2,43E-33 | 2 | Slc25a5       |
| 2,21E-37 | 0,591733 | 0,4   | 0,103 | 2,74E-33 | 2 | Smc2          |
| 2,37E-37 | 0,330756 | 0,208 | 0,024 | 2,94E-33 | 2 | Bub1          |
| 3,6E-37  | 0,848714 | 0,808 | 0,479 | 4,46E-33 | 2 | Paics         |
| 4,76E-37 | 0,70992  | 0,661 | 0,289 | 5,9E-33  | 2 | Dek           |
| 5,63E-37 | 0,739937 | 0,992 | 0,955 | 6,97E-33 | 2 | Npm1          |
| 5,72E-37 | 0,502705 | 0,286 | 0,052 | 7,08E-33 | 2 | Nusap1        |
| 7,94E-37 | 0,503314 | 0,322 | 0,068 | 9,83E-33 | 2 | Mms22l        |
| 1,17E-36 | 0,712866 | 0,951 | 0,795 | 1,45E-32 | 2 | Hnrnpa3       |
| 2,38E-36 | -1,33354 | 0,102 | 0,531 | 2,94E-32 | 2 | Ifi203        |
| 2,71E-36 | 0,451484 | 0,4   | 0,104 | 3,36E-32 | 2 | Alyref        |
| 5,82E-36 | 0,316085 | 0,22  | 0,029 | 7,2E-32  | 2 | Ckap2l        |
| 6,76E-36 | 0,374334 | 0,273 | 0,048 | 8,37E-32 | 2 | Chaf1b        |
| 7,66E-36 | 0,555027 | 0,555 | 0,202 | 9,48E-32 | 2 | Nup62         |
| 8,29E-36 | 0,720583 | 0,812 | 0,453 | 1,03E-31 | 2 | Pgk1          |
| 9,24E-36 | 0,322297 | 0,192 | 0,021 | 1,14E-31 | 2 | Foxm1         |
| 1,71E-35 | 0,495726 | 0,408 | 0,109 | 2,12E-31 | 2 | Idi1          |
| 1,85E-35 | -0,59381 | 0,992 | 0,998 | 2,29E-31 | 2 | Cd37          |
| 1,96E-35 | 0,699738 | 0,743 | 0,359 | 2,43E-31 | 2 | Nme1          |
| 2,21E-35 | -1,26762 | 0,102 | 0,519 | 2,73E-31 | 2 | Pml           |
| 4,33E-35 | 0,650494 | 0,918 | 0,627 | 5,36E-31 | 2 | Prdx1         |
| 6,12E-35 | 0,72783  | 0,886 | 0,599 | 7,57E-31 | 2 | Hmgn1         |
| 7,52E-35 | 0,724399 | 0,955 | 0,759 | 9,31E-31 | 2 | Anp32b        |
| 1,05E-34 | 0,364522 | 0,204 | 0,026 | 1,3E-30  | 2 | Ttk           |
| 1,52E-34 | 0,607006 | 0,518 | 0,182 | 1,88E-30 | 2 | Atad2         |
| 1,53E-34 | 0,64627  | 0,955 | 0,694 | 1,89E-30 | 2 | Atp5g3        |
| 1,89E-34 | 0,601555 | 0,804 | 0,422 | 2,34E-30 | 2 | Cox5a         |
| 2,84E-34 | 0,284862 | 0,188 | 0,021 | 3,52E-30 | 2 | Zwilch        |
| 3,24E-34 | 0,795363 | 0,943 | 0,626 | 4,01E-30 | 2 | Igj           |
| 3,38E-34 | 0,466644 | 0,322 | 0,071 | 4,18E-30 | 2 | Kif23         |
| 3,92E-34 | 0,405681 | 0,412 | 0,114 | 4,85E-30 | 2 | Csrp1         |
| 4,63E-34 | 0,387847 | 0,327 | 0,073 | 5,74E-30 | 2 | Wdr76         |
| 6,59E-34 | 0,553815 | 0,731 | 0,323 | 8,15E-30 | 2 | Dbi           |
| 8,34E-34 | 0,465297 | 0,465 | 0,143 | 1,03E-29 | 2 | Cdt1          |
| 8,41E-34 | 0,745107 | 0,824 | 0,443 | 1,04E-29 | 2 | Mef2b         |
| 1,06E-33 | -0,98431 | 0,833 | 0,958 | 1,31E-29 | 2 | A630089N07Rik |
| 1,64E-33 | 0,357048 | 0,151 | 0,012 | 2,04E-29 | 2 | Ankle1        |
| 1,93E-33 | 0,850296 | 0,857 | 0,538 | 2,39E-29 | 2 | Klhl6         |
| 1,97E-33 | 0,286269 | 0,261 | 0,046 | 2,43E-29 | 2 | Hirip3        |

|          |          |       |       |          |   |               |
|----------|----------|-------|-------|----------|---|---------------|
| 2,05E-33 | 0,389575 | 0,261 | 0,046 | 2,54E-29 | 2 | C330027C09Rik |
| 3,31E-33 | 0,258957 | 0,188 | 0,022 | 4,1E-29  | 2 | Psmc3ip       |
| 3,37E-33 | 0,672388 | 0,939 | 0,712 | 4,17E-29 | 2 | Ywhae         |
| 4,47E-33 | 0,583041 | 0,988 | 0,91  | 5,54E-29 | 2 | Rbm3          |
| 6,93E-33 | 0,320442 | 0,257 | 0,045 | 8,58E-29 | 2 | 4930422G04Rik |
| 8,03E-33 | 0,613689 | 0,653 | 0,292 | 9,94E-29 | 2 | H2afv         |
| 8,27E-33 | 0,338519 | 0,253 | 0,044 | 1,02E-28 | 2 | Slc29a1       |
| 9,48E-33 | 0,349605 | 0,249 | 0,043 | 1,17E-28 | 2 | Casc5         |
| 1,39E-32 | -1,11015 | 0,253 | 0,618 | 1,72E-28 | 2 | Bank1         |
| 2,6E-32  | 0,546815 | 0,465 | 0,151 | 3,22E-28 | 2 | Pla2g12a      |
| 3,59E-32 | -1,09808 | 0,38  | 0,719 | 4,44E-28 | 2 | Gimap4        |
| 3,77E-32 | 0,815939 | 0,951 | 0,842 | 4,67E-28 | 2 | Eif5a         |
| 4,09E-32 | 0,308153 | 0,196 | 0,026 | 5,07E-28 | 2 | Ccnf          |
| 4,14E-32 | 0,452637 | 0,437 | 0,134 | 5,13E-28 | 2 | Lmnb1         |
| 4,35E-32 | 0,565426 | 0,527 | 0,199 | 5,38E-28 | 2 | Rfwd3         |
| 4,47E-32 | 0,478829 | 0,478 | 0,161 | 5,54E-28 | 2 | Msh6          |
| 4,83E-32 | 0,712685 | 0,808 | 0,477 | 5,99E-28 | 2 | Cycs          |
| 5,13E-32 | -0,8477  | 0,494 | 0,784 | 6,35E-28 | 2 | Hmha1         |
| 5,59E-32 | 0,492704 | 0,6   | 0,235 | 6,92E-28 | 2 | Ahcy          |
| 1,47E-31 | 0,278791 | 0,22  | 0,034 | 1,82E-27 | 2 | Pkmyt1        |
| 1,5E-31  | 0,358948 | 0,269 | 0,053 | 1,85E-27 | 2 | Ube2t         |
| 1,57E-31 | 0,606344 | 0,849 | 0,51  | 1,94E-27 | 2 | Snrpe         |
| 1,8E-31  | 0,62226  | 0,792 | 0,434 | 2,23E-27 | 2 | Rbbp4         |
| 2,96E-31 | 0,634552 | 0,804 | 0,456 | 3,67E-27 | 2 | Hprt          |
| 5,59E-31 | 0,521275 | 0,58  | 0,235 | 6,92E-27 | 2 | Rbmx1         |
| 5,83E-31 | 0,584688 | 0,869 | 0,528 | 7,22E-27 | 2 | Hnrnpd        |
| 7,45E-31 | 0,431861 | 0,327 | 0,079 | 9,23E-27 | 2 | Cks1b         |
| 1,31E-30 | 0,666432 | 0,955 | 0,828 | 1,63E-26 | 2 | Ybx1          |
| 2,45E-30 | -1,11947 | 0,078 | 0,455 | 3,04E-26 | 2 | Klf2          |
| 2,84E-30 | 0,364252 | 0,224 | 0,038 | 3,52E-26 | 2 | Kif4          |
| 3,26E-30 | -0,79088 | 0,951 | 0,985 | 4,04E-26 | 2 | H2-K1         |
| 4,15E-30 | -0,87461 | 0,653 | 0,838 | 5,13E-26 | 2 | Ctss          |
| 5,19E-30 | 0,415793 | 0,314 | 0,075 | 6,43E-26 | 2 | Cdca8         |
| 5,98E-30 | 0,557217 | 0,722 | 0,361 | 7,4E-26  | 2 | Anapc5        |
| 7,85E-30 | 0,716786 | 0,792 | 0,465 | 9,72E-26 | 2 | Pgam1         |
| 8,58E-30 | 0,409476 | 0,355 | 0,097 | 1,06E-25 | 2 | Mthfd2        |
| 8,92E-30 | -0,88518 | 0,171 | 0,55  | 1,1E-25  | 2 | Gimap8        |
| 8,96E-30 | -1,23254 | 0,086 | 0,467 | 1,11E-25 | 2 | Sell          |
| 9,71E-30 | 0,420854 | 0,343 | 0,092 | 1,2E-25  | 2 | Nelfe         |
| 1,07E-29 | 0,509734 | 0,996 | 0,979 | 1,32E-25 | 2 | Hnrnpa2b1     |
| 1,07E-29 | 0,302793 | 0,224 | 0,038 | 1,33E-25 | 2 | 4930427A07Rik |
| 1,08E-29 | 0,527927 | 0,527 | 0,203 | 1,34E-25 | 2 | Ybx3          |
| 1,19E-29 | 0,557253 | 0,535 | 0,212 | 1,47E-25 | 2 | 2700094K13Rik |
| 1,27E-29 | 0,615836 | 0,853 | 0,507 | 1,58E-25 | 2 | Atp5j         |
| 1,35E-29 | 0,626368 | 0,571 | 0,238 | 1,67E-25 | 2 | Usp1          |
| 2,58E-29 | 0,335944 | 0,347 | 0,093 | 3,19E-25 | 2 | Lsm2          |
| 3,42E-29 | -0,99532 | 0,58  | 0,832 | 4,23E-25 | 2 | Grk4          |
| 3,42E-29 | 0,459013 | 0,633 | 0,266 | 4,24E-25 | 2 | Eif1ax        |
| 3,54E-29 | -0,99294 | 0,163 | 0,54  | 4,39E-25 | 2 | Itga4         |
| 4,1E-29  | 0,571824 | 0,592 | 0,257 | 5,07E-25 | 2 | Samd1         |

|          |          |       |       |          |   |          |
|----------|----------|-------|-------|----------|---|----------|
| 4,42E-29 | 0,31002  | 0,204 | 0,032 | 5,47E-25 | 2 | Espl1    |
| 5,12E-29 | -0,92678 | 0,584 | 0,824 | 6,33E-25 | 2 | Mycbp2   |
| 6,48E-29 | 0,295034 | 0,224 | 0,04  | 8,02E-25 | 2 | Ndc80    |
| 9,9E-29  | -0,91719 | 0,082 | 0,455 | 1,23E-24 | 2 | Capg     |
| 1,04E-28 | -0,60007 | 0,98  | 0,994 | 1,29E-24 | 2 | H2-Ob    |
| 2,24E-28 | -0,67809 | 0,988 | 0,997 | 2,78E-24 | 2 | B2m      |
| 2,26E-28 | 0,486389 | 0,408 | 0,136 | 2,8E-24  | 2 | Phgdh    |
| 4,27E-28 | 0,289876 | 0,22  | 0,04  | 5,29E-24 | 2 | Cenpm    |
| 6,82E-28 | -0,96676 | 0,322 | 0,644 | 8,44E-24 | 2 | Lmo2     |
| 6,83E-28 | -0,57089 | 1     | 0,999 | 8,46E-24 | 2 | Ly6e     |
| 9,74E-28 | 0,592289 | 0,971 | 0,829 | 1,21E-23 | 2 | Set      |
| 1E-27    | 0,323452 | 0,257 | 0,055 | 1,24E-23 | 2 | Cenpw    |
| 1,68E-27 | 0,415071 | 0,388 | 0,123 | 2,08E-23 | 2 | Rpa3     |
| 1,78E-27 | 0,60664  | 0,661 | 0,35  | 2,2E-23  | 2 | Ssrp1    |
| 1,82E-27 | 0,60288  | 0,845 | 0,545 | 2,26E-23 | 2 | Mdh1     |
| 1,94E-27 | 0,408992 | 0,453 | 0,158 | 2,4E-23  | 2 | Uchl5    |
| 1,97E-27 | 0,626721 | 0,731 | 0,427 | 2,44E-23 | 2 | Eif4a1   |
| 3,34E-27 | 0,440928 | 0,58  | 0,245 | 4,14E-23 | 2 | Pold1    |
| 3,66E-27 | -1,0007  | 0,18  | 0,527 | 4,53E-23 | 2 | Fam65b   |
| 6,18E-27 | 0,515349 | 0,816 | 0,469 | 7,65E-23 | 2 | Snrpb    |
| 7,02E-27 | 0,373463 | 0,457 | 0,161 | 8,69E-23 | 2 | Ppil1    |
| 7,02E-27 | 0,549474 | 0,959 | 0,765 | 8,69E-23 | 2 | Srsf3    |
| 1,08E-26 | -0,78037 | 0,71  | 0,877 | 1,34E-22 | 2 | D4Wsu53e |
| 1,12E-26 | -0,88698 | 0,237 | 0,577 | 1,39E-22 | 2 | Gimap3   |
| 1,34E-26 | 0,322192 | 0,22  | 0,041 | 1,66E-22 | 2 | Mis18bp1 |
| 1,74E-26 | 0,293337 | 0,233 | 0,047 | 2,15E-22 | 2 | Brca2    |
| 2,68E-26 | 0,566901 | 0,943 | 0,801 | 3,32E-22 | 2 | Serbp1   |
| 3,19E-26 | 0,517689 | 0,653 | 0,318 | 3,95E-22 | 2 | Rfc2     |
| 3,2E-26  | 0,570327 | 0,465 | 0,178 | 3,96E-22 | 2 | Pim1     |
| 3,32E-26 | 0,487681 | 0,612 | 0,275 | 4,11E-22 | 2 | Naa40    |
| 3,68E-26 | 0,628634 | 0,988 | 0,955 | 4,56E-22 | 2 | Hsp90ab1 |
| 3,79E-26 | 0,259875 | 0,208 | 0,038 | 4,69E-22 | 2 | Dctpp1   |
| 4,34E-26 | -0,8073  | 0,416 | 0,716 | 5,37E-22 | 2 | Pisd-ps1 |
| 6,01E-26 | -0,4226  | 1     | 1     | 7,44E-22 | 2 | H2-Aa    |
| 7,63E-26 | 0,424444 | 0,535 | 0,218 | 9,45E-22 | 2 | Exosc8   |
| 8,34E-26 | 0,429549 | 0,408 | 0,138 | 1,03E-21 | 2 | Tfrc     |
| 8,68E-26 | 0,565387 | 0,939 | 0,763 | 1,07E-21 | 2 | Pkm      |
| 1,08E-25 | -0,83088 | 0,261 | 0,597 | 1,34E-21 | 2 | Samd9l   |
| 1,13E-25 | 0,543218 | 0,898 | 0,703 | 1,4E-21  | 2 | Hnrnpu   |
| 1,51E-25 | -0,87492 | 0,31  | 0,62  | 1,87E-21 | 2 | Gimap6   |
| 2,65E-25 | 0,268977 | 0,208 | 0,039 | 3,28E-21 | 2 | Ccne1    |
| 2,82E-25 | 0,41155  | 0,441 | 0,16  | 3,5E-21  | 2 | Ipo5     |
| 3,04E-25 | 0,40649  | 0,237 | 0,052 | 3,76E-21 | 2 | Spag5    |
| 4,66E-25 | 0,425174 | 0,363 | 0,116 | 5,77E-21 | 2 | Birc5    |
| 5,33E-25 | -0,79567 | 0,041 | 0,376 | 6,6E-21  | 2 | S100a10  |
| 5,71E-25 | 0,567759 | 0,714 | 0,401 | 7,07E-21 | 2 | Anp32e   |
| 5,74E-25 | 0,427079 | 0,351 | 0,109 | 7,1E-21  | 2 | Racgap1  |
| 7,13E-25 | 0,555896 | 0,927 | 0,685 | 8,83E-21 | 2 | Srsf7    |
| 8E-25    | 0,416167 | 0,322 | 0,093 | 9,9E-21  | 2 | Prc1     |
| 9,09E-25 | -0,488   | 1     | 0,997 | 1,13E-20 | 2 | Ddx5     |



|          |          |       |       |          |   |          |
|----------|----------|-------|-------|----------|---|----------|
| 1,01E-24 | -0,81048 | 0,457 | 0,713 | 1,25E-20 | 2 | Scd1     |
| 1,03E-24 | 0,697609 | 0,743 | 0,439 | 1,28E-20 | 2 | Nop56    |
| 1,05E-24 | -0,92532 | 0,212 | 0,525 | 1,3E-20  | 2 | Txnip    |
| 1,08E-24 | 0,318315 | 0,298 | 0,079 | 1,33E-20 | 2 | Ube2e3   |
| 1,1E-24  | -0,82242 | 0,086 | 0,436 | 1,36E-20 | 2 | Snn      |
| 1,42E-24 | -0,93464 | 0,061 | 0,398 | 1,76E-20 | 2 | Gm1966   |
| 1,49E-24 | 0,694083 | 0,784 | 0,5   | 1,85E-20 | 2 | Smc4     |
| 1,59E-24 | -0,89961 | 0,612 | 0,82  | 1,97E-20 | 2 | Faim3    |
| 1,62E-24 | 0,439695 | 0,473 | 0,186 | 2,01E-20 | 2 | Rbl1     |
| 1,96E-24 | 0,569382 | 0,441 | 0,172 | 2,43E-20 | 2 | H2afx    |
| 2,24E-24 | -0,79312 | 0,11  | 0,445 | 2,77E-20 | 2 | Mylip    |
| 2,62E-24 | 0,250679 | 0,167 | 0,026 | 3,24E-20 | 2 | Trip13   |
| 2,9E-24  | 0,29147  | 0,257 | 0,062 | 3,58E-20 | 2 | Cdc25a   |
| 3E-24    | -0,93664 | 0,041 | 0,365 | 3,72E-20 | 2 | Bcl2     |
| 3,01E-24 | 0,292337 | 0,335 | 0,099 | 3,73E-20 | 2 | Pola2    |
| 3,51E-24 | 0,469697 | 0,763 | 0,411 | 4,35E-20 | 2 | Cct8     |
| 4,64E-24 | -0,79542 | 0,539 | 0,764 | 5,75E-20 | 2 | Stk17b   |
| 4,67E-24 | 0,405139 | 0,396 | 0,138 | 5,79E-20 | 2 | Rnaseh2b |
| 4,71E-24 | 0,591252 | 0,902 | 0,751 | 5,83E-20 | 2 | Atp5b    |
| 7,48E-24 | 0,504851 | 0,947 | 0,771 | 9,26E-20 | 2 | Atp5a1   |
| 7,99E-24 | 0,555246 | 0,739 | 0,412 | 9,89E-20 | 2 | Dck      |
| 9,8E-24  | 0,533968 | 0,669 | 0,348 | 1,21E-19 | 2 | Suz12    |
| 1,12E-23 | -0,37026 | 1     | 1     | 1,38E-19 | 2 | H2-Eb1   |
| 1,24E-23 | 0,344966 | 0,392 | 0,136 | 1,54E-19 | 2 | Mrpl12   |
| 1,25E-23 | 0,530913 | 0,731 | 0,418 | 1,55E-19 | 2 | Rfc1     |
| 1,36E-23 | 0,451267 | 0,596 | 0,274 | 1,68E-19 | 2 | Phf5a    |
| 1,46E-23 | -0,80536 | 0,122 | 0,449 | 1,8E-19  | 2 | Anxa6    |
| 1,73E-23 | -0,7944  | 0,102 | 0,441 | 2,14E-19 | 2 | B3gnt5   |
| 1,76E-23 | 0,5572   | 0,665 | 0,361 | 2,18E-19 | 2 | Smc1a    |
| 1,76E-23 | 0,499467 | 1     | 0,991 | 2,18E-19 | 2 | Pabpc1   |
| 2,02E-23 | 0,362604 | 0,404 | 0,143 | 2,5E-19  | 2 | Dtymk    |
| 2,21E-23 | 0,541573 | 0,727 | 0,412 | 2,74E-19 | 2 | Psip1    |
| 2,42E-23 | 0,478265 | 0,996 | 0,937 | 3E-19    | 2 | Nap1l1   |
| 3,34E-23 | 0,298305 | 0,257 | 0,064 | 4,13E-19 | 2 | Ccdc34   |
| 4,55E-23 | 0,478943 | 0,722 | 0,405 | 5,63E-19 | 2 | Azin1    |
| 4,59E-23 | 0,406938 | 0,445 | 0,174 | 5,68E-19 | 2 | C1qbp    |
| 4,67E-23 | 0,391184 | 0,347 | 0,113 | 5,78E-19 | 2 | Tpx2     |
| 5,05E-23 | 0,569324 | 0,722 | 0,411 | 6,26E-19 | 2 | Nhp2l1   |
| 6,06E-23 | 0,387525 | 0,433 | 0,164 | 7,51E-19 | 2 | Wbp5     |
| 7,97E-23 | 0,273761 | 0,257 | 0,065 | 9,87E-19 | 2 | Rbbp8    |
| 8,08E-23 | 0,540635 | 0,894 | 0,642 | 1E-18    | 2 | Pcbp1    |
| 1,01E-22 | 0,456685 | 0,624 | 0,308 | 1,25E-18 | 2 | Rps27l   |
| 1,03E-22 | 0,462079 | 0,706 | 0,384 | 1,27E-18 | 2 | Syncrip  |
| 1,07E-22 | 0,467092 | 0,694 | 0,386 | 1,33E-18 | 2 | Tcp1     |
| 1,09E-22 | -0,5021  | 0,996 | 0,999 | 1,36E-18 | 2 | Cd19     |
| 1,31E-22 | 0,461465 | 0,624 | 0,315 | 1,63E-18 | 2 | Mrpl18   |
| 1,37E-22 | -0,64902 | 0,902 | 0,965 | 1,69E-18 | 2 | Cd22     |
| 1,43E-22 | 0,508882 | 0,829 | 0,524 | 1,77E-18 | 2 | Psmb7    |
| 1,46E-22 | 0,377562 | 0,306 | 0,093 | 1,81E-18 | 2 | Rcc1     |
| 1,59E-22 | 0,462046 | 0,657 | 0,337 | 1,97E-18 | 2 | Taf9     |

|          |          |       |       |          |   |           |
|----------|----------|-------|-------|----------|---|-----------|
| 1,6E-22  | 0,478139 | 0,49  | 0,208 | 1,98E-18 | 2 | Nop58     |
| 2,08E-22 | 0,505256 | 0,486 | 0,212 | 2,58E-18 | 2 | Kpna2     |
| 2,33E-22 | -0,75927 | 0,192 | 0,502 | 2,89E-18 | 2 | Pld4      |
| 2,73E-22 | 0,453456 | 0,653 | 0,331 | 3,38E-18 | 2 | Usmg5     |
| 2,9E-22  | 0,271885 | 0,237 | 0,057 | 3,59E-18 | 2 | Tmem48    |
| 3,31E-22 | 0,492632 | 0,518 | 0,235 | 4,1E-18  | 2 | Ndufab1   |
| 3,45E-22 | 0,410977 | 0,396 | 0,142 | 4,27E-18 | 2 | H1fx      |
| 3,54E-22 | 0,295804 | 0,208 | 0,045 | 4,38E-18 | 2 | Cep55     |
| 3,89E-22 | 0,450926 | 0,498 | 0,215 | 4,82E-18 | 2 | Hspd1     |
| 4,24E-22 | 0,396368 | 0,514 | 0,227 | 5,25E-18 | 2 | Uchl3     |
| 4,36E-22 | -0,91773 | 0,212 | 0,522 | 5,4E-18  | 2 | Abca1     |
| 6,76E-22 | 0,485671 | 0,731 | 0,42  | 8,37E-18 | 2 | Nucks1    |
| 1,1E-21  | 0,448343 | 0,543 | 0,25  | 1,36E-17 | 2 | Xrcc1     |
| 1,28E-21 | -0,49294 | 0,98  | 0,993 | 1,59E-17 | 2 | Cd79b     |
| 1,92E-21 | -0,70704 | 0,42  | 0,687 | 2,38E-17 | 2 | H2-T23    |
| 1,92E-21 | 0,2675   | 0,265 | 0,072 | 2,38E-17 | 2 | Haus4     |
| 2,03E-21 | 0,47472  | 0,718 | 0,432 | 2,51E-17 | 2 | Kpnb1     |
| 2,56E-21 | 0,42693  | 1     | 0,997 | 3,17E-17 | 2 | Rplp0     |
| 2,61E-21 | 0,343734 | 0,404 | 0,151 | 3,23E-17 | 2 | Casp8ap2  |
| 3,44E-21 | 0,433775 | 0,661 | 0,351 | 4,26E-17 | 2 | Pnp       |
| 3,53E-21 | 0,400584 | 0,437 | 0,179 | 4,37E-17 | 2 | Nhp2      |
| 3,54E-21 | -0,85792 | 0,127 | 0,429 | 4,38E-17 | 2 | Dgka      |
| 4,75E-21 | 0,481991 | 0,322 | 0,109 | 5,88E-17 | 2 | Nuf2      |
| 4,89E-21 | -0,87566 | 0,216 | 0,52  | 6,06E-17 | 2 | Dock10    |
| 5E-21    | 0,482743 | 0,314 | 0,104 | 6,19E-17 | 2 | Srm       |
| 5,03E-21 | 0,306038 | 0,302 | 0,092 | 6,23E-17 | 2 | Arhgap11a |
| 5,18E-21 | 0,476604 | 0,633 | 0,342 | 6,41E-17 | 2 | Tkt       |
| 7,33E-21 | -0,6265  | 0,016 | 0,3   | 9,07E-17 | 2 | Itgb7     |
| 7,41E-21 | 0,358502 | 0,482 | 0,2   | 9,17E-17 | 2 | Cisd1     |
| 7,59E-21 | 0,338716 | 0,335 | 0,112 | 9,4E-17  | 2 | Zfp367    |
| 8,13E-21 | -0,80567 | 0,147 | 0,447 | 1,01E-16 | 2 | Add3      |
| 8,66E-21 | 0,393999 | 0,473 | 0,207 | 1,07E-16 | 2 | Ncaph2    |
| 1,03E-20 | 0,322462 | 0,363 | 0,129 | 1,27E-16 | 2 | Ada       |
| 1,05E-20 | 0,472684 | 0,771 | 0,478 | 1,3E-16  | 2 | Cct5      |
| 1,06E-20 | 0,618546 | 1     | 0,992 | 1,32E-16 | 2 | Rps2      |
| 1,15E-20 | 0,28275  | 0,241 | 0,063 | 1,42E-16 | 2 | Cdkn2c    |
| 1,19E-20 | 0,503966 | 0,931 | 0,761 | 1,48E-16 | 2 | Atp5g2    |
| 1,32E-20 | 0,475149 | 0,873 | 0,641 | 1,63E-16 | 2 | Cox6a1    |
| 1,42E-20 | 0,388    | 0,588 | 0,287 | 1,76E-16 | 2 | Arpp19    |
| 1,59E-20 | 0,292638 | 0,18  | 0,037 | 1,97E-16 | 2 | Sgol2     |
| 1,67E-20 | 0,298911 | 0,253 | 0,069 | 2,07E-16 | 2 | Ncapd3    |
| 1,67E-20 | 0,31744  | 0,416 | 0,16  | 2,07E-16 | 2 | Pbdc1     |
| 1,93E-20 | 0,431879 | 0,702 | 0,396 | 2,39E-16 | 2 | Glr3      |
| 3,66E-20 | 0,348307 | 0,449 | 0,183 | 4,53E-16 | 2 | Rgs10     |
| 3,79E-20 | 0,393398 | 0,563 | 0,268 | 4,69E-16 | 2 | Tceb1     |
| 4,09E-20 | 0,428965 | 0,722 | 0,414 | 5,06E-16 | 2 | Psma1     |
| 4,35E-20 | -0,8687  | 0,547 | 0,756 | 5,38E-16 | 2 | Ly6a      |
| 4,74E-20 | 0,459033 | 0,514 | 0,245 | 5,86E-16 | 2 | Mrpl42    |
| 4,75E-20 | 0,355378 | 0,429 | 0,172 | 5,88E-16 | 2 | Snrpa1    |
| 4,95E-20 | 0,397289 | 1     | 0,997 | 6,13E-16 | 2 | Actg1     |

|          |          |       |       |          |   |               |
|----------|----------|-------|-------|----------|---|---------------|
| 5,5E-20  | -0,67714 | 0,543 | 0,764 | 6,81E-16 | 2 | Siglecg       |
| 7,11E-20 | 0,2874   | 0,245 | 0,068 | 8,81E-16 | 2 | Hmgb3         |
| 8,26E-20 | 0,427479 | 0,547 | 0,263 | 1,02E-15 | 2 | Uba2          |
| 1,29E-19 | -0,67357 | 0,008 | 0,275 | 1,6E-15  | 2 | Cd55          |
| 1,3E-19  | 0,297165 | 0,278 | 0,084 | 1,62E-15 | 2 | Tinf2         |
| 1,76E-19 | 0,415107 | 0,429 | 0,176 | 2,18E-15 | 2 | Cyp51         |
| 1,97E-19 | 0,375335 | 0,531 | 0,252 | 2,43E-15 | 2 | Impdh2        |
| 2,02E-19 | 0,423226 | 0,547 | 0,27  | 2,5E-15  | 2 | Rpa1          |
| 2,1E-19  | -0,61235 | 0,771 | 0,894 | 2,59E-15 | 2 | Gm10845       |
| 3,14E-19 | 0,566212 | 0,922 | 0,777 | 3,89E-15 | 2 | Pou2af1       |
| 3,17E-19 | 0,459317 | 0,531 | 0,265 | 3,92E-15 | 2 | Ube2s         |
| 3,21E-19 | 0,453021 | 0,62  | 0,34  | 3,97E-15 | 2 | Naa50         |
| 4,02E-19 | 0,378245 | 0,514 | 0,24  | 4,98E-15 | 2 | Tagln2        |
| 5,8E-19  | 0,375509 | 0,58  | 0,286 | 7,18E-15 | 2 | Cse1l         |
| 5,93E-19 | 0,357022 | 0,42  | 0,176 | 7,34E-15 | 2 | Lsm3          |
| 6,83E-19 | 0,28624  | 0,253 | 0,074 | 8,46E-15 | 2 | Pold2         |
| 6,84E-19 | -0,75025 | 0,102 | 0,379 | 8,46E-15 | 2 | Map3k1        |
| 7,64E-19 | -0,80801 | 0,176 | 0,458 | 9,46E-15 | 2 | Sub1          |
| 9,82E-19 | 0,397367 | 0,384 | 0,156 | 1,22E-14 | 2 | Wee1          |
| 1,05E-18 | 0,492824 | 0,71  | 0,404 | 1,29E-14 | 2 | Cmpk1         |
| 1,3E-18  | 0,605347 | 0,853 | 0,698 | 1,61E-14 | 2 | Ncl           |
| 1,41E-18 | -0,53976 | 0,02  | 0,28  | 1,75E-14 | 2 | Hhex          |
| 1,5E-18  | 0,309876 | 0,473 | 0,203 | 1,86E-14 | 2 | Ubap2         |
| 1,51E-18 | 0,482015 | 0,698 | 0,431 | 1,86E-14 | 2 | Ptbp1         |
| 1,66E-18 | 0,759984 | 0,861 | 0,683 | 2,05E-14 | 2 | Erdr1         |
| 1,68E-18 | 0,372375 | 0,486 | 0,228 | 2,08E-14 | 2 | Nudt21        |
| 1,96E-18 | 0,347986 | 0,155 | 0,031 | 2,43E-14 | 2 | Gstt1         |
| 2,13E-18 | -0,64912 | 0,216 | 0,487 | 2,64E-14 | 2 | Psap          |
| 2,31E-18 | -0,55075 | 0,082 | 0,355 | 2,86E-14 | 2 | Tspan32       |
| 2,52E-18 | -0,72566 | 0,204 | 0,493 | 3,12E-14 | 2 | Evi2b         |
| 2,81E-18 | 0,437614 | 0,878 | 0,633 | 3,48E-14 | 2 | Ppp1ca        |
| 3,3E-18  | 0,61745  | 0,592 | 0,355 | 4,09E-14 | 2 | Shmt2         |
| 3,59E-18 | 0,380147 | 0,563 | 0,277 | 4,45E-14 | 2 | 1810037I17Rik |
| 3,9E-18  | 0,401297 | 0,665 | 0,366 | 4,82E-14 | 2 | Odc1          |
| 4,22E-18 | 0,40364  | 0,804 | 0,528 | 5,23E-14 | 2 | Tra2b         |
| 4,28E-18 | 0,407022 | 0,531 | 0,265 | 5,3E-14  | 2 | Txn1          |
| 4,34E-18 | 0,372075 | 0,363 | 0,142 | 5,37E-14 | 2 | Pno1          |
| 4,66E-18 | 0,426179 | 0,322 | 0,118 | 5,77E-14 | 2 | Cenpe         |
| 4,94E-18 | 0,395712 | 0,567 | 0,288 | 6,12E-14 | 2 | Hdgf          |
| 5,59E-18 | 0,351292 | 0,437 | 0,194 | 6,92E-14 | 2 | Pdap1         |
| 5,76E-18 | -0,58529 | 0,392 | 0,632 | 7,13E-14 | 2 | Dok3          |
| 7,07E-18 | 0,44135  | 0,727 | 0,448 | 8,76E-14 | 2 | Psma2         |
| 7,72E-18 | -0,78559 | 0,306 | 0,543 | 9,56E-14 | 2 | Itm2b         |
| 8,34E-18 | 0,25121  | 0,261 | 0,081 | 1,03E-13 | 2 | Cdc7          |
| 8,7E-18  | 0,38451  | 0,637 | 0,352 | 1,08E-13 | 2 | Vdac3         |
| 9,15E-18 | -0,68276 | 0,596 | 0,791 | 1,13E-13 | 2 | Prkcb         |
| 1,01E-17 | -0,71915 | 0,282 | 0,552 | 1,25E-13 | 2 | Pyhin1        |
| 1,6E-17  | 0,418384 | 0,698 | 0,415 | 1,98E-13 | 2 | Cdk2ap1       |
| 1,7E-17  | 0,389624 | 0,702 | 0,421 | 2,1E-13  | 2 | Atp5j2        |
| 1,84E-17 | -0,64329 | 0,045 | 0,301 | 2,27E-13 | 2 | Serpinb1a     |

|          |          |       |       |          |   |          |
|----------|----------|-------|-------|----------|---|----------|
| 1,84E-17 | -0,62201 | 0,396 | 0,65  | 2,28E-13 | 2 | Tbc1d10c |
| 2,12E-17 | 0,324209 | 0,576 | 0,291 | 2,63E-13 | 2 | Uqcr10   |
| 2,29E-17 | 0,329624 | 0,322 | 0,122 | 2,84E-13 | 2 | Brip1    |
| 2,54E-17 | 0,445607 | 0,514 | 0,264 | 3,15E-13 | 2 | Dkc1     |
| 2,63E-17 | 0,286389 | 0,286 | 0,096 | 3,26E-13 | 2 | Mis18a   |
| 2,77E-17 | 0,53502  | 0,657 | 0,393 | 3,43E-13 | 2 | Gcsam    |
| 3,32E-17 | -0,62562 | 0,163 | 0,434 | 4,11E-13 | 2 | Ubl3     |
| 3,48E-17 | 0,381894 | 0,624 | 0,347 | 4,31E-13 | 2 | Snrpf    |
| 3,93E-17 | 0,410061 | 0,649 | 0,389 | 4,86E-13 | 2 | Lsm4     |
| 4,29E-17 | 0,27079  | 0,322 | 0,118 | 5,31E-13 | 2 | Atic     |
| 4,41E-17 | 0,294886 | 1     | 1     | 5,46E-13 | 2 | Actb     |
| 4,71E-17 | 0,34734  | 0,449 | 0,202 | 5,83E-13 | 2 | Etfa     |
| 4,96E-17 | 0,486287 | 0,988 | 0,953 | 6,14E-13 | 2 | Pfn1     |
| 5,17E-17 | 0,303116 | 0,298 | 0,106 | 6,4E-13  | 2 | Hjulp    |
| 5,32E-17 | 0,42978  | 0,849 | 0,64  | 6,59E-13 | 2 | Tardbp   |
| 5,51E-17 | 0,252465 | 0,261 | 0,083 | 6,83E-13 | 2 | Ttf2     |
| 5,95E-17 | 0,352286 | 1     | 0,991 | 7,37E-13 | 2 | H3f3a    |
| 6,57E-17 | -0,7947  | 0,302 | 0,553 | 8,13E-13 | 2 | Foxp1    |
| 7,48E-17 | 0,319341 | 0,596 | 0,313 | 9,26E-13 | 2 | Bub3     |
| 8,34E-17 | -0,65876 | 0,163 | 0,427 | 1,03E-12 | 2 | Trim34a  |
| 8,38E-17 | -0,81018 | 0,273 | 0,542 | 1,04E-12 | 2 | Vim      |
| 9,48E-17 | -0,60535 | 0,58  | 0,771 | 1,17E-12 | 2 | Ltb      |
| 9,58E-17 | -0,66814 | 0,294 | 0,536 | 1,19E-12 | 2 | Ralgps2  |
| 9,74E-17 | 0,487108 | 0,865 | 0,628 | 1,21E-12 | 2 | Banf1    |
| 9,94E-17 | 0,421915 | 0,878 | 0,725 | 1,23E-12 | 2 | Hnrnpf   |
| 1,01E-16 | 0,397689 | 0,853 | 0,595 | 1,26E-12 | 2 | Snrpg    |
| 1,08E-16 | 0,454014 | 0,633 | 0,361 | 1,34E-12 | 2 | Cct6a    |
| 1,09E-16 | 0,463599 | 0,637 | 0,389 | 1,35E-12 | 2 | Eif2s1   |
| 1,18E-16 | 0,412306 | 0,78  | 0,531 | 1,46E-12 | 2 | Nono     |
| 1,25E-16 | -0,70591 | 0,4   | 0,641 | 1,55E-12 | 2 | Mll5     |
| 1,33E-16 | 0,342713 | 1     | 0,992 | 1,64E-12 | 2 | Rpl28    |
| 1,34E-16 | -0,602   | 0,012 | 0,245 | 1,66E-12 | 2 | Arhgef18 |
| 1,38E-16 | 0,347244 | 0,555 | 0,291 | 1,71E-12 | 2 | Nsmce4a  |
| 1,59E-16 | -0,66774 | 0,718 | 0,843 | 1,97E-12 | 2 | Lax1     |
| 1,89E-16 | 0,356399 | 0,535 | 0,273 | 2,34E-12 | 2 | Sfxn1    |
| 1,91E-16 | -0,59232 | 0,143 | 0,402 | 2,37E-12 | 2 | Cyb561a3 |
| 2,14E-16 | 0,358944 | 1     | 0,999 | 2,65E-12 | 2 | Rpl41    |
| 2,19E-16 | 0,31582  | 0,384 | 0,164 | 2,71E-12 | 2 | Naa38    |
| 2,25E-16 | 0,295787 | 0,522 | 0,255 | 2,78E-12 | 2 | Ddx39    |
| 2,32E-16 | 0,433263 | 0,796 | 0,535 | 2,88E-12 | 2 | Trim28   |
| 2,56E-16 | 0,366489 | 0,551 | 0,287 | 3,17E-12 | 2 | Atp1b3   |
| 2,86E-16 | 0,360976 | 0,51  | 0,252 | 3,54E-12 | 2 | Snhg1    |
| 4E-16    | 0,284016 | 0,298 | 0,108 | 4,95E-12 | 2 | Tex30    |
| 4,18E-16 | 0,270017 | 0,282 | 0,1   | 5,18E-12 | 2 | Prdx4    |
| 4,35E-16 | 0,3274   | 0,498 | 0,241 | 5,38E-12 | 2 | Smagp    |
| 5,79E-16 | -0,83495 | 0,486 | 0,676 | 7,17E-12 | 2 | Vmn2r55  |
| 5,79E-16 | 0,38722  | 0,592 | 0,329 | 7,17E-12 | 2 | Al662270 |
| 5,82E-16 | 0,344695 | 0,62  | 0,341 | 7,21E-12 | 2 | Ube2n    |
| 5,85E-16 | -0,67046 | 0,233 | 0,487 | 7,25E-12 | 2 | Filip1l  |
| 5,98E-16 | 0,356892 | 0,478 | 0,235 | 7,4E-12  | 2 | U2af1    |

|          |          |       |       |          |   |               |
|----------|----------|-------|-------|----------|---|---------------|
| 6,66E-16 | 0,285306 | 0,42  | 0,185 | 8,24E-12 | 2 | Tmem256       |
| 6,85E-16 | -0,51581 | 0,008 | 0,231 | 8,47E-12 | 2 | Ccr6          |
| 7,7E-16  | 0,363567 | 0,359 | 0,15  | 9,54E-12 | 2 | Ngfrap1       |
| 8,88E-16 | -0,6888  | 0,351 | 0,586 | 1,1E-11  | 2 | Gm10785       |
| 9,25E-16 | -0,3294  | 1     | 0,999 | 1,15E-11 | 2 | Rps24         |
| 9,75E-16 | 0,34745  | 0,796 | 0,504 | 1,21E-11 | 2 | Ppp4r2        |
| 1,03E-15 | 0,347767 | 0,502 | 0,26  | 1,28E-11 | 2 | Anapc11       |
| 1,07E-15 | 0,318266 | 0,404 | 0,177 | 1,32E-11 | 2 | Asf1a         |
| 1,1E-15  | 0,36396  | 0,392 | 0,172 | 1,36E-11 | 2 | Suv39h1       |
| 1,12E-15 | 0,299905 | 0,233 | 0,074 | 1,39E-11 | 2 | Timm8a1       |
| 1,12E-15 | -0,6165  | 0,751 | 0,873 | 1,39E-11 | 2 | Samhd1        |
| 1,14E-15 | 0,43563  | 0,563 | 0,326 | 1,41E-11 | 2 | Atp5g1        |
| 1,18E-15 | -0,60166 | 0,037 | 0,271 | 1,46E-11 | 2 | Gpr183        |
| 1,19E-15 | -0,60618 | 0,033 | 0,262 | 1,47E-11 | 2 | Zfp318        |
| 1,25E-15 | 0,36973  | 0,449 | 0,214 | 1,55E-11 | 2 | Ccnd3         |
| 1,27E-15 | 0,367285 | 0,653 | 0,401 | 1,58E-11 | 2 | Khsrp         |
| 1,28E-15 | 0,289054 | 0,424 | 0,191 | 1,58E-11 | 2 | Eri1          |
| 1,34E-15 | 0,382377 | 0,878 | 0,63  | 1,66E-11 | 2 | Cox6c         |
| 1,39E-15 | 0,476084 | 0,665 | 0,402 | 1,72E-11 | 2 | 8430410A17Rik |
| 1,51E-15 | 0,407165 | 0,837 | 0,565 | 1,87E-11 | 2 | Hnrnpa0       |
| 1,57E-15 | 0,413666 | 0,62  | 0,366 | 1,95E-11 | 2 | Cct3          |
| 1,8E-15  | 0,286733 | 0,331 | 0,133 | 2,23E-11 | 2 | Nt5c3b        |
| 1,81E-15 | 0,371784 | 0,49  | 0,262 | 2,24E-11 | 2 | Tmem14c       |
| 1,87E-15 | -0,58933 | 0,437 | 0,639 | 2,32E-11 | 2 | Gimap1        |
| 2,25E-15 | 0,413754 | 0,751 | 0,508 | 2,79E-11 | 2 | Psm7          |
| 2,31E-15 | -0,58563 | 0,18  | 0,421 | 2,86E-11 | 2 | Il4ra         |
| 2,55E-15 | 0,348105 | 0,527 | 0,282 | 3,15E-11 | 2 | Phb2          |
| 2,77E-15 | 0,252654 | 1     | 1     | 3,43E-11 | 2 | mtNd1         |
| 2,87E-15 | 0,325885 | 0,253 | 0,089 | 3,55E-11 | 2 | Gstt2         |
| 2,91E-15 | -0,64466 | 0,176 | 0,419 | 3,61E-11 | 2 | Stk10         |
| 3,08E-15 | 0,40291  | 0,735 | 0,485 | 3,81E-11 | 2 | Eif4h         |
| 3,15E-15 | 0,293914 | 0,192 | 0,053 | 3,9E-11  | 2 | Ckap2         |
| 3,37E-15 | -0,60759 | 0,539 | 0,722 | 4,17E-11 | 2 | Smg1          |
| 3,37E-15 | 0,324056 | 0,273 | 0,1   | 4,17E-11 | 2 | Pgp           |
| 3,45E-15 | 0,328182 | 0,42  | 0,193 | 4,27E-11 | 2 | Dpy30         |
| 3,69E-15 | 0,360618 | 0,682 | 0,409 | 4,57E-11 | 2 | Atp5o         |
| 4,02E-15 | 0,423512 | 0,853 | 0,613 | 4,98E-11 | 2 | Erp44         |
| 4,5E-15  | 0,376038 | 0,996 | 0,981 | 5,57E-11 | 2 | Ucp2          |
| 4,61E-15 | 0,250777 | 0,176 | 0,047 | 5,7E-11  | 2 | Blm           |
| 4,78E-15 | 0,43163  | 0,722 | 0,486 | 5,92E-11 | 2 | Eif2s2        |
| 5,46E-15 | 0,447925 | 0,759 | 0,491 | 6,76E-11 | 2 | Tceb2         |
| 5,73E-15 | 0,279529 | 0,351 | 0,148 | 7,09E-11 | 2 | Dera          |
| 5,92E-15 | 0,350754 | 0,751 | 0,461 | 7,33E-11 | 2 | Atp5f1        |
| 5,95E-15 | -0,60308 | 0,237 | 0,494 | 7,36E-11 | 2 | A130077B15Rik |
| 6,03E-15 | 0,386239 | 0,78  | 0,517 | 7,47E-11 | 2 | Psmb4         |
| 6,6E-15  | 0,366453 | 0,437 | 0,214 | 8,17E-11 | 2 | Nudc          |
| 7,46E-15 | 0,335028 | 0,347 | 0,149 | 9,24E-11 | 2 | Smc5          |
| 8,62E-15 | 0,325841 | 0,473 | 0,235 | 1,07E-10 | 2 | Sf3a3         |
| 8,71E-15 | 0,333552 | 0,408 | 0,191 | 1,08E-10 | 2 | Hspa14        |
| 8,94E-15 | 0,413872 | 0,453 | 0,234 | 1,11E-10 | 2 | Actn4         |

|          |          |       |       |          |   |         |
|----------|----------|-------|-------|----------|---|---------|
| 9,04E-15 | 0,441061 | 0,816 | 0,551 | 1,12E-10 | 2 | Mbd2    |
| 1,09E-14 | -0,6115  | 0,449 | 0,666 | 1,35E-10 | 2 | Lbh     |
| 1,15E-14 | 0,311615 | 0,298 | 0,115 | 1,43E-10 | 2 | Ccnb2   |
| 1,26E-14 | -0,55969 | 0,686 | 0,822 | 1,56E-10 | 2 | Mll1    |
| 1,47E-14 | -0,59793 | 0,029 | 0,243 | 1,82E-10 | 2 | S1pr1   |
| 1,54E-14 | 0,289132 | 0,702 | 0,389 | 1,91E-10 | 2 | S1pr2   |
| 1,57E-14 | 0,293128 | 0,412 | 0,193 | 1,95E-10 | 2 | Snrnp40 |
| 1,94E-14 | 0,367826 | 0,657 | 0,4   | 2,4E-10  | 2 | Rnps1   |
| 2,08E-14 | -0,58703 | 0,482 | 0,677 | 2,57E-10 | 2 | Blk     |
| 2,14E-14 | 0,390706 | 0,869 | 0,679 | 2,65E-10 | 2 | Srsf1   |
| 2,17E-14 | -0,57286 | 0,122 | 0,353 | 2,69E-10 | 2 | Rasgrp2 |
| 2,29E-14 | -0,55124 | 0,808 | 0,867 | 2,83E-10 | 2 | Mcl1    |
| 2,36E-14 | -0,41148 | 0,963 | 0,991 | 2,92E-10 | 2 | Ptprc   |
| 2,38E-14 | 0,273827 | 0,339 | 0,144 | 2,94E-10 | 2 | Mbnl3   |
| 2,82E-14 | 0,315533 | 0,355 | 0,156 | 3,49E-10 | 2 | Ddx19a  |
| 2,87E-14 | 0,363349 | 0,535 | 0,285 | 3,55E-10 | 2 | Eaf2    |
| 2,95E-14 | 0,525751 | 0,755 | 0,566 | 3,66E-10 | 2 | Nme2    |
| 3,06E-14 | 0,409914 | 0,653 | 0,401 | 3,79E-10 | 2 | Xpo1    |
| 3,12E-14 | 0,336757 | 0,535 | 0,284 | 3,86E-10 | 2 | Etf1    |
| 3,27E-14 | 0,374144 | 0,49  | 0,26  | 4,04E-10 | 2 | Sae1    |
| 3,3E-14  | 0,398803 | 0,637 | 0,383 | 4,09E-10 | 2 | Ndufc2  |
| 3,37E-14 | 0,379352 | 0,669 | 0,411 | 4,18E-10 | 2 | Sf3b4   |
| 3,5E-14  | 0,331972 | 0,445 | 0,217 | 4,33E-10 | 2 | Aars    |
| 3,96E-14 | 0,369078 | 0,62  | 0,361 | 4,9E-10  | 2 | Bzw1    |
| 3,99E-14 | 0,399384 | 0,612 | 0,361 | 4,94E-10 | 2 | Pebp1   |
| 4,1E-14  | 0,455756 | 0,804 | 0,602 | 5,07E-10 | 2 | Calm2   |
| 4,1E-14  | 0,374076 | 0,461 | 0,239 | 5,07E-10 | 2 | Eif4e   |
| 4,13E-14 | 0,316784 | 0,608 | 0,355 | 5,11E-10 | 2 | Baz1b   |
| 4,37E-14 | 0,31507  | 0,347 | 0,15  | 5,41E-10 | 2 | Hmgn5   |
| 4,38E-14 | -0,4939  | 0,057 | 0,277 | 5,42E-10 | 2 | Cdkn1b  |
| 4,38E-14 | -0,4864  | 0,78  | 0,905 | 5,43E-10 | 2 | Zfp36l1 |
| 4,68E-14 | 0,361509 | 0,833 | 0,596 | 5,8E-10  | 2 | Cox6b1  |
| 4,7E-14  | 0,275643 | 0,249 | 0,09  | 5,81E-10 | 2 | Hmmr    |
| 5,01E-14 | 0,349877 | 0,571 | 0,321 | 6,2E-10  | 2 | Polr2g  |
| 5,32E-14 | 0,306818 | 1     | 1     | 6,59E-10 | 2 | Rpsa    |
| 6,21E-14 | 0,327686 | 0,604 | 0,349 | 7,68E-10 | 2 | Psmc2   |
| 6,45E-14 | 0,345074 | 0,739 | 0,48  | 7,99E-10 | 2 | Cox5b   |
| 6,87E-14 | 0,259055 | 0,249 | 0,09  | 8,51E-10 | 2 | Carhsp1 |
| 7,36E-14 | -0,59472 | 0,645 | 0,784 | 9,11E-10 | 2 | Btla    |
| 8,36E-14 | -0,53144 | 0,159 | 0,383 | 1,03E-09 | 2 | Myl12b  |
| 9,24E-14 | 0,332419 | 0,535 | 0,295 | 1,14E-09 | 2 | Got2    |
| 1,07E-13 | -0,42595 | 0,943 | 0,985 | 1,32E-09 | 2 | Rpl37a  |
| 1,27E-13 | 0,326941 | 0,665 | 0,409 | 1,57E-09 | 2 | Ptges3  |
| 1,28E-13 | -0,45931 | 0,11  | 0,338 | 1,59E-09 | 2 | Malt1   |
| 1,3E-13  | 0,310341 | 0,433 | 0,216 | 1,61E-09 | 2 | Smarcc1 |
| 1,35E-13 | 0,272338 | 0,424 | 0,202 | 1,67E-09 | 2 | Actl6a  |
| 1,36E-13 | 0,274115 | 0,482 | 0,252 | 1,69E-09 | 2 | Eif4a3  |
| 1,39E-13 | -0,50408 | 0,588 | 0,737 | 1,72E-09 | 2 | Gm9846  |
| 1,39E-13 | 0,308382 | 0,461 | 0,235 | 1,72E-09 | 2 | Larp7   |
| 1,62E-13 | 0,329987 | 0,184 | 0,055 | 2E-09    | 2 | Tnfsf9  |

|          |          |       |       |          |   |           |
|----------|----------|-------|-------|----------|---|-----------|
| 1,63E-13 | -0,5054  | 0,024 | 0,225 | 2,01E-09 | 2 | Scml4     |
| 2,02E-13 | -0,45856 | 0,102 | 0,328 | 2,5E-09  | 2 | Pbxip1    |
| 2,86E-13 | 0,348854 | 0,906 | 0,722 | 3,54E-09 | 2 | Serf2     |
| 3,14E-13 | 0,342649 | 0,367 | 0,172 | 3,88E-09 | 2 | Tuba1c    |
| 3,3E-13  | -0,4406  | 0,057 | 0,271 | 4,08E-09 | 2 | Notch2    |
| 3,45E-13 | -0,28094 | 1     | 0,999 | 4,27E-09 | 2 | Fau       |
| 3,45E-13 | 0,389157 | 0,829 | 0,618 | 4,27E-09 | 2 | Top1      |
| 3,5E-13  | -0,60711 | 0,269 | 0,492 | 4,33E-09 | 2 | Zfp71-rs1 |
| 3,71E-13 | 0,340795 | 0,718 | 0,454 | 4,59E-09 | 2 | Sec61b    |
| 3,73E-13 | -0,61562 | 0,192 | 0,418 | 4,62E-09 | 2 | Gns       |
| 3,75E-13 | 0,383526 | 0,796 | 0,595 | 4,65E-09 | 2 | Ppp1cc    |
| 3,94E-13 | 0,400175 | 0,763 | 0,53  | 4,88E-09 | 2 | Vcp       |
| 4,03E-13 | -0,4725  | 0,167 | 0,397 | 4,99E-09 | 2 | Trim12c   |
| 4,21E-13 | -0,47004 | 0,135 | 0,361 | 5,21E-09 | 2 | Zmym5     |
| 4,33E-13 | -0,6178  | 0,278 | 0,498 | 5,36E-09 | 2 | March1    |
| 4,49E-13 | 0,322702 | 0,559 | 0,32  | 5,56E-09 | 2 | Cuta      |
| 4,64E-13 | 0,294047 | 0,502 | 0,266 | 5,74E-09 | 2 | Bzw2      |
| 4,73E-13 | 0,322498 | 0,445 | 0,228 | 5,85E-09 | 2 | Rif1      |
| 5,67E-13 | 0,413859 | 0,739 | 0,497 | 7,02E-09 | 2 | Mtf2      |
| 6,17E-13 | -0,55766 | 0,457 | 0,644 | 7,64E-09 | 2 | Clk1      |
| 6,19E-13 | 0,36253  | 0,612 | 0,373 | 7,66E-09 | 2 | Helq      |
| 6,86E-13 | -0,58582 | 0,273 | 0,491 | 8,49E-09 | 2 | Tlr1      |
| 6,93E-13 | -0,48206 | 0,127 | 0,358 | 8,57E-09 | 2 | Ier5      |
| 7,07E-13 | 0,311645 | 0,473 | 0,252 | 8,75E-09 | 2 | Stra13    |
| 7,32E-13 | -0,63516 | 0,02  | 0,211 | 9,06E-09 | 2 | Plac8     |
| 7,98E-13 | 0,299149 | 0,49  | 0,266 | 9,88E-09 | 2 | Eed       |
| 8,85E-13 | -0,48967 | 0,298 | 0,499 | 1,1E-08  | 2 | Acap1     |
| 9,37E-13 | 0,310752 | 0,894 | 0,666 | 1,16E-08 | 2 | Hnrnpk    |
| 9,97E-13 | 0,364685 | 0,951 | 0,856 | 1,23E-08 | 2 | Cd24a     |
| 1,03E-12 | -0,46393 | 0,849 | 0,926 | 1,27E-08 | 2 | Ptpn6     |
| 1,07E-12 | -0,26744 | 1     | 1     | 1,32E-08 | 2 | Rpl17     |
| 1,27E-12 | 0,4885   | 0,31  | 0,141 | 1,58E-08 | 2 | Pnkf      |
| 1,3E-12  | 0,29267  | 0,461 | 0,239 | 1,6E-08  | 2 | Ruvbl2    |
| 1,32E-12 | 0,341107 | 0,702 | 0,458 | 1,63E-08 | 2 | Minos1    |
| 1,33E-12 | 0,331075 | 0,465 | 0,248 | 1,65E-08 | 2 | Aldh9a1   |
| 1,35E-12 | 0,327212 | 0,424 | 0,22  | 1,67E-08 | 2 | Isyna1    |
| 1,36E-12 | 0,286901 | 0,318 | 0,142 | 1,68E-08 | 2 | Itpa      |
| 1,51E-12 | -0,49545 | 0,122 | 0,34  | 1,87E-08 | 2 | Lrrc33    |
| 1,65E-12 | 0,330351 | 0,437 | 0,228 | 2,04E-08 | 2 | Hspa9     |
| 1,66E-12 | 0,326203 | 0,653 | 0,404 | 2,06E-08 | 2 | Pomp      |
| 1,85E-12 | 0,343139 | 0,461 | 0,252 | 2,29E-08 | 2 | Rbm8a     |
| 1,99E-12 | -0,55098 | 0,592 | 0,766 | 2,46E-08 | 2 | Fcrla     |
| 2,22E-12 | -0,52633 | 0,465 | 0,647 | 2,75E-08 | 2 | Helz2     |
| 2,23E-12 | 0,266613 | 0,498 | 0,272 | 2,76E-08 | 2 | Prdx2     |
| 2,29E-12 | -0,5124  | 0,143 | 0,361 | 2,83E-08 | 2 | Rapgef4   |
| 2,64E-12 | -0,60558 | 0,245 | 0,451 | 3,27E-08 | 2 | Ncf1      |
| 2,73E-12 | 0,306321 | 0,396 | 0,199 | 3,38E-08 | 2 | Snhg5     |
| 2,88E-12 | -0,52483 | 0,4   | 0,593 | 3,56E-08 | 2 | Arhgap4   |
| 2,99E-12 | 0,250069 | 0,494 | 0,257 | 3,7E-08  | 2 | Tcerg1    |
| 3,16E-12 | -0,58599 | 0,486 | 0,66  | 3,91E-08 | 2 | B4galnt1  |

|          |          |       |       |          |   |               |
|----------|----------|-------|-------|----------|---|---------------|
| 3,32E-12 | 0,267875 | 0,514 | 0,281 | 4,11E-08 | 2 | Snrpc         |
| 3,62E-12 | -0,51143 | 0,167 | 0,381 | 4,48E-08 | 2 | Ankrd44       |
| 3,77E-12 | 0,346601 | 0,71  | 0,485 | 4,67E-08 | 2 | Shfm1         |
| 3,97E-12 | 0,315917 | 0,588 | 0,358 | 4,92E-08 | 2 | eGFP          |
| 4,53E-12 | 0,298379 | 0,465 | 0,251 | 5,61E-08 | 2 | Timm23        |
| 5,23E-12 | 0,371765 | 0,845 | 0,649 | 6,48E-08 | 2 | Hspe1         |
| 6,02E-12 | 0,47478  | 0,429 | 0,231 | 7,46E-08 | 2 | Nrgn          |
| 6,09E-12 | 0,338378 | 0,559 | 0,341 | 7,54E-08 | 2 | Smc3          |
| 6,15E-12 | 0,298476 | 0,882 | 0,662 | 7,61E-08 | 2 | Arpc5l        |
| 6,26E-12 | 0,355115 | 0,718 | 0,52  | 7,75E-08 | 2 | Tomm20        |
| 6,34E-12 | 0,282818 | 0,457 | 0,243 | 7,85E-08 | 2 | Snrpd2        |
| 6,39E-12 | -0,45063 | 0,11  | 0,317 | 7,91E-08 | 2 | Jhdm1d        |
| 6,9E-12  | -0,48756 | 0,38  | 0,573 | 8,55E-08 | 2 | Wdr26         |
| 6,94E-12 | -0,43259 | 0,151 | 0,361 | 8,59E-08 | 2 | Rabac1        |
| 7,59E-12 | 0,296924 | 0,437 | 0,234 | 9,39E-08 | 2 | Smarca5       |
| 7,61E-12 | 0,30749  | 0,547 | 0,318 | 9,42E-08 | 2 | Psmb5         |
| 8,03E-12 | 0,278192 | 0,482 | 0,267 | 9,94E-08 | 2 | Oxct1         |
| 8,93E-12 | 0,304014 | 0,678 | 0,427 | 1,11E-07 | 2 | Pmf1          |
| 9,36E-12 | 0,289736 | 0,571 | 0,339 | 1,16E-07 | 2 | Rad23b        |
| 1E-11    | 0,288448 | 0,327 | 0,152 | 1,24E-07 | 2 | Slmo2         |
| 1,06E-11 | 0,288229 | 0,506 | 0,285 | 1,32E-07 | 2 | Kars          |
| 1,09E-11 | 0,291852 | 0,992 | 0,962 | 1,35E-07 | 2 | Calm1         |
| 1,1E-11  | -0,40465 | 0,078 | 0,276 | 1,36E-07 | 2 | 2900060B14Rik |
| 1,11E-11 | 0,303276 | 0,404 | 0,209 | 1,37E-07 | 2 | Gars          |
| 1,11E-11 | -0,49701 | 0,286 | 0,495 | 1,37E-07 | 2 | Rasal3        |
| 1,27E-11 | 0,301603 | 0,416 | 0,22  | 1,57E-07 | 2 | Pfkp          |
| 1,28E-11 | 0,315931 | 0,49  | 0,274 | 1,58E-07 | 2 | Cetn3         |
| 1,29E-11 | 0,265755 | 0,343 | 0,161 | 1,6E-07  | 2 | Nup205        |
| 1,33E-11 | 0,289333 | 0,412 | 0,214 | 1,65E-07 | 2 | Slamf7        |
| 1,35E-11 | -0,46617 | 0,592 | 0,744 | 1,68E-07 | 2 | Iqgap1        |
| 1,36E-11 | 0,285474 | 0,518 | 0,295 | 1,68E-07 | 2 | Ak2           |
| 1,4E-11  | -0,5451  | 0,441 | 0,658 | 1,73E-07 | 2 | Fcer2a        |
| 1,47E-11 | -0,46838 | 0,049 | 0,236 | 1,82E-07 | 2 | Lgals9        |
| 1,56E-11 | 0,258643 | 0,355 | 0,173 | 1,93E-07 | 2 | Eftud2        |
| 1,71E-11 | -0,46845 | 0,469 | 0,637 | 2,12E-07 | 2 | Bin1          |
| 1,76E-11 | -0,31665 | 1     | 1     | 2,18E-07 | 2 | Cd79a         |
| 1,81E-11 | -0,59603 | 0,449 | 0,615 | 2,24E-07 | 2 | Zbtb20        |
| 1,84E-11 | -0,50705 | 0,098 | 0,291 | 2,27E-07 | 2 | Man1a         |
| 1,89E-11 | -0,40562 | 0,008 | 0,173 | 2,34E-07 | 2 | Cd38          |
| 2,1E-11  | 0,30716  | 0,457 | 0,26  | 2,6E-07  | 2 | Fbl           |
| 2,12E-11 | -0,32494 | 0,98  | 0,991 | 2,63E-07 | 2 | Rps14         |
| 2,16E-11 | 0,292656 | 0,318 | 0,15  | 2,68E-07 | 2 | Irak1bp1      |
| 2,3E-11  | 0,250393 | 0,4   | 0,203 | 2,85E-07 | 2 | Rangap1       |
| 2,31E-11 | 0,326833 | 0,367 | 0,186 | 2,86E-07 | 2 | Pdk3          |
| 2,35E-11 | -0,46612 | 0,106 | 0,305 | 2,91E-07 | 2 | Chd2          |
| 2,5E-11  | 0,281789 | 0,624 | 0,377 | 3,09E-07 | 2 | Dcaf12        |
| 2,53E-11 | 0,325331 | 0,776 | 0,546 | 3,13E-07 | 2 | Cyfp2         |
| 2,54E-11 | 0,358762 | 0,841 | 0,656 | 3,14E-07 | 2 | Atp5h         |
| 3,03E-11 | 0,286261 | 0,433 | 0,235 | 3,75E-07 | 2 | Cops6         |
| 3,27E-11 | 0,328161 | 0,927 | 0,763 | 4,04E-07 | 2 | Cox8a         |



|          |          |       |       |          |   |         |
|----------|----------|-------|-------|----------|---|---------|
| 3,33E-11 | 0,307632 | 1     | 0,984 | 4,13E-07 | 2 | Eef1b2  |
| 3,58E-11 | 0,325141 | 0,629 | 0,404 | 4,43E-07 | 2 | Rcc2    |
| 3,66E-11 | 0,310178 | 0,416 | 0,219 | 4,53E-07 | 2 | Usp14   |
| 3,67E-11 | 0,331226 | 0,535 | 0,324 | 4,55E-07 | 2 | Psma5   |
| 3,87E-11 | 0,290791 | 0,563 | 0,351 | 4,79E-07 | 2 | Sdhb    |
| 3,93E-11 | 0,300973 | 0,588 | 0,357 | 4,86E-07 | 2 | Calm3   |
| 4,09E-11 | 0,354634 | 0,376 | 0,191 | 5,07E-07 | 2 | Siah2   |
| 4,16E-11 | -0,50041 | 0,249 | 0,442 | 5,14E-07 | 2 | S100a11 |
| 4,2E-11  | 0,294769 | 0,776 | 0,55  | 5,2E-07  | 2 | Oaz1    |
| 4,27E-11 | 0,34453  | 0,759 | 0,547 | 5,29E-07 | 2 | Cox7b   |
| 4,32E-11 | 0,287005 | 0,616 | 0,381 | 5,34E-07 | 2 | Abrac1  |
| 4,36E-11 | 0,294257 | 1     | 0,995 | 5,4E-07  | 2 | Tmsb10  |
| 4,44E-11 | -0,491   | 0,665 | 0,784 | 5,49E-07 | 2 | Arhgef1 |
| 4,93E-11 | 0,283408 | 0,584 | 0,365 | 6,1E-07  | 2 | Hnrnp1  |
| 5,02E-11 | 0,325015 | 0,727 | 0,513 | 6,22E-07 | 2 | Fus     |
| 5,09E-11 | 0,304333 | 0,518 | 0,303 | 6,31E-07 | 2 | Atp2a2  |
| 5,47E-11 | 0,275142 | 0,355 | 0,177 | 6,77E-07 | 2 | Mrpl17  |
| 5,51E-11 | 0,269596 | 0,551 | 0,325 | 6,82E-07 | 2 | Cox7a2  |
| 5,64E-11 | -0,36589 | 0,033 | 0,207 | 6,98E-07 | 2 | Abcg1   |
| 5,75E-11 | -0,3983  | 0,053 | 0,231 | 7,12E-07 | 2 | Tcp11l2 |
| 6,23E-11 | -0,51681 | 0,58  | 0,711 | 7,71E-07 | 2 | Chst3   |
| 6,55E-11 | -0,35655 | 0,049 | 0,228 | 8,11E-07 | 2 | Phf1    |
| 6,6E-11  | -0,43168 | 0,359 | 0,56  | 8,17E-07 | 2 | Gm19757 |
| 7,63E-11 | -0,47769 | 0,645 | 0,77  | 9,45E-07 | 2 | Hvcn1   |
| 7,66E-11 | 0,311822 | 0,698 | 0,468 | 9,49E-07 | 2 | Ssbp3   |
| 7,71E-11 | 0,292588 | 0,498 | 0,291 | 9,55E-07 | 2 | Psmd1   |
| 7,92E-11 | 0,329635 | 0,42  | 0,231 | 9,81E-07 | 2 | Tfg     |
| 8,26E-11 | 0,271602 | 0,641 | 0,404 | 1,02E-06 | 2 | Atp5k   |
| 8,36E-11 | 0,341734 | 0,784 | 0,555 | 1,04E-06 | 2 | Tcea1   |
| 8,48E-11 | 0,260363 | 0,498 | 0,281 | 1,05E-06 | 2 | Sf3a2   |
| 8,6E-11  | -0,41798 | 0,139 | 0,339 | 1,06E-06 | 2 | Rnase6  |
| 9,16E-11 | -0,37103 | 0,024 | 0,19  | 1,13E-06 | 2 | Cd97    |
| 9,32E-11 | -0,47009 | 0,498 | 0,651 | 1,15E-06 | 2 | Unc93b1 |
| 1,01E-10 | 0,360126 | 0,637 | 0,427 | 1,25E-06 | 2 | Fkbp1a  |
| 1,06E-10 | -0,53541 | 0,306 | 0,497 | 1,32E-06 | 2 | Slc12a6 |
| 1,21E-10 | 0,312416 | 0,322 | 0,157 | 1,5E-06  | 2 | Gnl3    |
| 1,23E-10 | -0,42115 | 0,188 | 0,393 | 1,53E-06 | 2 | Mllt6   |
| 1,23E-10 | 0,258502 | 0,49  | 0,277 | 1,53E-06 | 2 | Thoc7   |
| 1,3E-10  | -0,49692 | 0,224 | 0,422 | 1,61E-06 | 2 | Rasa3   |
| 1,4E-10  | -0,42814 | 0,706 | 0,825 | 1,73E-06 | 2 | H2-DMb1 |
| 1,44E-10 | -0,50724 | 0,196 | 0,39  | 1,79E-06 | 2 | Cytip   |
| 1,46E-10 | -0,41006 | 0,069 | 0,249 | 1,8E-06  | 2 | Neat1   |
| 1,51E-10 | -0,36219 | 0,004 | 0,154 | 1,87E-06 | 2 | Myo1f   |
| 1,53E-10 | 0,272269 | 0,588 | 0,36  | 1,89E-06 | 2 | Rtn3    |
| 1,54E-10 | 0,317501 | 0,816 | 0,611 | 1,9E-06  | 2 | Hnrpd1  |
| 1,54E-10 | -0,45114 | 0,102 | 0,292 | 1,91E-06 | 2 | Fgd2    |
| 1,55E-10 | 0,309452 | 0,767 | 0,557 | 1,92E-06 | 2 | Hn1     |
| 1,56E-10 | 0,268029 | 0,453 | 0,257 | 1,93E-06 | 2 | Rsl1d1  |
| 1,59E-10 | 0,255373 | 0,331 | 0,161 | 1,96E-06 | 2 | Nolc1   |
| 1,68E-10 | -0,31264 | 0,016 | 0,174 | 2,08E-06 | 2 | Arhgef3 |

|          |          |       |       |          |   |               |
|----------|----------|-------|-------|----------|---|---------------|
| 1,69E-10 | 0,280543 | 0,8   | 0,585 | 2,09E-06 | 2 | Sod1          |
| 1,77E-10 | -0,4429  | 0,706 | 0,795 | 2,2E-06  | 2 | Lsp1          |
| 1,82E-10 | 0,321936 | 0,682 | 0,455 | 2,25E-06 | 2 | Lbr           |
| 1,96E-10 | -0,47088 | 0,604 | 0,751 | 2,43E-06 | 2 | Ablim1        |
| 2,21E-10 | -0,3666  | 0,024 | 0,185 | 2,73E-06 | 2 | Bhlhe41       |
| 2,37E-10 | 0,275868 | 0,412 | 0,225 | 2,93E-06 | 2 | Gspt1         |
| 2,4E-10  | -0,30961 | 0     | 0,144 | 2,97E-06 | 2 | Plbd1         |
| 2,43E-10 | 0,269417 | 0,424 | 0,228 | 3,01E-06 | 2 | Ndufb6        |
| 2,5E-10  | 0,264623 | 0,539 | 0,316 | 3,09E-06 | 2 | Lsm6          |
| 2,5E-10  | 0,273983 | 0,784 | 0,543 | 3,1E-06  | 2 | Polr1d        |
| 2,6E-10  | -0,47734 | 0,376 | 0,543 | 3,22E-06 | 2 | Rbm5          |
| 2,63E-10 | 0,29555  | 0,661 | 0,453 | 3,26E-06 | 2 | Eif3c         |
| 2,94E-10 | -0,40225 | 0,171 | 0,368 | 3,64E-06 | 2 | Gramd1a       |
| 3,02E-10 | 0,3255   | 0,592 | 0,383 | 3,74E-06 | 2 | Ndufa4        |
| 3,61E-10 | -0,38694 | 0,02  | 0,175 | 4,47E-06 | 2 | A630033H2ORik |
| 3,9E-10  | 0,267822 | 0,714 | 0,493 | 4,83E-06 | 2 | Nedd8         |
| 3,93E-10 | -0,38316 | 0,02  | 0,174 | 4,86E-06 | 2 | Kbtbd11       |
| 3,97E-10 | 0,251881 | 0,535 | 0,319 | 4,92E-06 | 2 | Dap           |
| 4,09E-10 | 0,330252 | 0,604 | 0,394 | 5,07E-06 | 2 | Cacybp        |
| 4,11E-10 | 0,301164 | 0,776 | 0,563 | 5,09E-06 | 2 | Taf10         |
| 4,23E-10 | 0,339551 | 0,616 | 0,412 | 5,24E-06 | 2 | Srsf10        |
| 4,35E-10 | -0,3924  | 0,82  | 0,89  | 5,39E-06 | 2 | Son           |
| 4,39E-10 | -0,48408 | 0,053 | 0,223 | 5,43E-06 | 2 | Irgm1         |
| 4,42E-10 | 0,29371  | 0,812 | 0,616 | 5,47E-06 | 2 | Ywhaq         |
| 4,44E-10 | 0,279693 | 0,347 | 0,176 | 5,49E-06 | 2 | Mybl1         |
| 4,49E-10 | -0,40274 | 0,367 | 0,55  | 5,56E-06 | 2 | Arhgap30      |
| 4,84E-10 | 0,3402   | 0,653 | 0,45  | 6E-06    | 2 | Cbfb          |
| 5,01E-10 | 0,305876 | 0,633 | 0,422 | 6,21E-06 | 2 | Csnk2b        |
| 5,02E-10 | -0,38322 | 0,167 | 0,355 | 6,22E-06 | 2 | Slc28a2       |
| 5,3E-10  | 0,278755 | 0,58  | 0,377 | 6,57E-06 | 2 | Uqcrq         |
| 5,78E-10 | -0,27444 | 0,045 | 0,209 | 7,16E-06 | 2 | Gm5595        |
| 5,83E-10 | 0,268943 | 0,192 | 0,073 | 7,21E-06 | 2 | Cenpf         |
| 6,28E-10 | -0,48215 | 0,216 | 0,401 | 7,78E-06 | 2 | Kif21b        |
| 6,31E-10 | -0,32847 | 0,016 | 0,166 | 7,82E-06 | 2 | Cnn3          |
| 6,34E-10 | -0,50475 | 0,514 | 0,638 | 7,85E-06 | 2 | Snx2          |
| 6,5E-10  | 0,347665 | 0,486 | 0,297 | 8,05E-06 | 2 | Fkbp4         |
| 6,61E-10 | 0,277665 | 0,861 | 0,713 | 8,19E-06 | 2 | Sfpq          |
| 6,87E-10 | 0,263848 | 0,727 | 0,501 | 8,5E-06  | 2 | Ewsr1         |
| 7,39E-10 | 0,317183 | 0,963 | 0,928 | 9,15E-06 | 2 | H3f3b         |
| 7,5E-10  | 0,293697 | 0,71  | 0,5   | 9,29E-06 | 2 | Pbrm1         |
| 7,86E-10 | -0,55282 | 0,384 | 0,552 | 9,73E-06 | 2 | Sfrs18        |
| 7,98E-10 | 0,276541 | 0,437 | 0,256 | 9,88E-06 | 2 | Strap         |
| 8,15E-10 | -0,44419 | 0,416 | 0,593 | 1,01E-05 | 2 | Ypel3         |
| 8,54E-10 | -0,3831  | 0,078 | 0,248 | 1,06E-05 | 2 | Ppcs          |
| 9,14E-10 | 0,250287 | 0,351 | 0,185 | 1,13E-05 | 2 | Mrpl40        |
| 9,31E-10 | -0,36883 | 0,188 | 0,373 | 1,15E-05 | 2 | Uba7          |
| 9,4E-10  | 0,255594 | 0,641 | 0,415 | 1,16E-05 | 2 | Cdv3          |
| 9,53E-10 | 0,276153 | 0,637 | 0,423 | 1,18E-05 | 2 | Ndufa12       |
| 9,62E-10 | 0,27084  | 0,322 | 0,16  | 1,19E-05 | 2 | Hmgcs1        |
| 1,05E-09 | 0,33966  | 0,298 | 0,15  | 1,3E-05  | 2 | Ddt           |

|          |          |       |       |          |   |               |
|----------|----------|-------|-------|----------|---|---------------|
| 1,05E-09 | -0,39662 | 0,045 | 0,204 | 1,3E-05  | 2 | Pydc3         |
| 1,15E-09 | -0,38165 | 0,098 | 0,277 | 1,43E-05 | 2 | Cyp4f18       |
| 1,19E-09 | -0,39785 | 0,159 | 0,348 | 1,47E-05 | 2 | AB124611      |
| 1,22E-09 | -0,42598 | 0,478 | 0,637 | 1,51E-05 | 2 | H2-Oa         |
| 1,25E-09 | -0,29442 | 1     | 0,993 | 1,54E-05 | 2 | Rps21         |
| 1,45E-09 | -0,39741 | 0,224 | 0,413 | 1,8E-05  | 2 | 2310034O05Rik |
| 1,46E-09 | 0,312265 | 0,576 | 0,377 | 1,81E-05 | 2 | Ap2s1         |
| 1,55E-09 | -0,30622 | 0,012 | 0,153 | 1,92E-05 | 2 | Ccr7          |
| 1,55E-09 | 0,253684 | 0,429 | 0,243 | 1,92E-05 | 2 | Psmd13        |
| 1,55E-09 | 0,250141 | 0,347 | 0,181 | 1,92E-05 | 2 | Tomm40        |
| 1,61E-09 | 0,252161 | 0,384 | 0,207 | 2E-05    | 2 | Casp2         |
| 1,68E-09 | -0,48101 | 0,327 | 0,498 | 2,08E-05 | 2 | Fcrl1         |
| 1,94E-09 | -0,33592 | 0,053 | 0,212 | 2,4E-05  | 2 | AI467606      |
| 2,04E-09 | -0,36218 | 0,016 | 0,158 | 2,52E-05 | 2 | Ahnak         |
| 2,04E-09 | -0,36946 | 0,065 | 0,226 | 2,52E-05 | 2 | Sbk1          |
| 2,06E-09 | -0,5405  | 0,388 | 0,539 | 2,55E-05 | 2 | Flna          |
| 2,4E-09  | -0,4146  | 0,282 | 0,455 | 2,98E-05 | 2 | Mll2          |
| 2,58E-09 | -0,42753 | 0,102 | 0,273 | 3,2E-05  | 2 | Pecam1        |
| 2,66E-09 | -0,44146 | 0,257 | 0,43  | 3,29E-05 | 2 | Tnrc6b        |
| 2,76E-09 | 0,28204  | 0,649 | 0,436 | 3,42E-05 | 2 | 2010107E04Rik |
| 2,8E-09  | 0,258963 | 0,996 | 0,995 | 3,47E-05 | 2 | Rpl3          |
| 3E-09    | 0,276379 | 0,465 | 0,281 | 3,72E-05 | 2 | Dstn          |
| 3,01E-09 | -0,43763 | 0,163 | 0,348 | 3,73E-05 | 2 | Cd2           |
| 3,2E-09  | 0,272983 | 0,633 | 0,426 | 3,96E-05 | 2 | Spcs2         |
| 3,21E-09 | 0,273057 | 0,784 | 0,563 | 3,97E-05 | 2 | Tpm4          |
| 3,25E-09 | 0,280067 | 0,645 | 0,44  | 4,03E-05 | 2 | Hint1         |
| 3,84E-09 | 0,295176 | 0,608 | 0,419 | 4,75E-05 | 2 | G3bp1         |
| 4,07E-09 | 0,275013 | 0,527 | 0,331 | 5,04E-05 | 2 | Smarca4       |
| 4,5E-09  | -0,54821 | 0,633 | 0,773 | 5,58E-05 | 2 | Il2rg         |
| 4,94E-09 | -0,32467 | 0,02  | 0,16  | 6,12E-05 | 2 | Kctd14        |
| 5,1E-09  | -0,40585 | 0,29  | 0,468 | 6,31E-05 | 2 | Tgfbr2        |
| 5,55E-09 | -0,41522 | 0,322 | 0,498 | 6,87E-05 | 2 | Mgat1         |
| 7,4E-09  | -0,34767 | 0,057 | 0,215 | 9,16E-05 | 2 | Hbp1          |
| 7,49E-09 | 0,323957 | 0,669 | 0,479 | 9,27E-05 | 2 | Syngn2        |
| 7,77E-09 | -0,43017 | 0,833 | 0,856 | 9,62E-05 | 2 | Eif4a2        |
| 8,48E-09 | -0,28891 | 0,045 | 0,193 | 0,000105 | 2 | Gm2a          |
| 8,67E-09 | 0,31992  | 0,588 | 0,407 | 0,000107 | 2 | Psma4         |
| 8,76E-09 | 0,314761 | 1     | 1     | 0,000108 | 2 | mtNd3         |
| 9,59E-09 | -0,32826 | 0,196 | 0,384 | 0,000119 | 2 | Lrrc2         |
| 9,66E-09 | 0,251175 | 0,873 | 0,692 | 0,00012  | 2 | Ube2d2a       |
| 1,06E-08 | -0,43499 | 0,224 | 0,393 | 0,000131 | 2 | Ppp3ca        |
| 1,07E-08 | -0,35172 | 0,918 | 0,93  | 0,000133 | 2 | Sf3b1         |
| 1,08E-08 | -0,34842 | 0,11  | 0,28  | 0,000133 | 2 | Smarca2       |
| 1,09E-08 | 0,25767  | 0,388 | 0,218 | 0,000135 | 2 | Elavl1        |
| 1,09E-08 | -0,37348 | 0,229 | 0,405 | 0,000135 | 2 | Use1          |
| 1,23E-08 | -0,31019 | 0,024 | 0,16  | 0,000153 | 2 | Trim30b       |
| 1,34E-08 | -0,32122 | 0,033 | 0,172 | 0,000166 | 2 | Ddx58         |
| 1,39E-08 | -0,31035 | 0,029 | 0,167 | 0,000172 | 2 | Ckap4         |
| 1,39E-08 | -0,3856  | 0,229 | 0,408 | 0,000173 | 2 | Zbtb4         |
| 1,46E-08 | 0,291053 | 0,755 | 0,589 | 0,000181 | 2 | Ube2i         |

|          |          |       |       |          |   |           |
|----------|----------|-------|-------|----------|---|-----------|
| 1,58E-08 | -0,34888 | 0,155 | 0,326 | 0,000195 | 2 | Gmfg      |
| 1,61E-08 | -0,4394  | 0,196 | 0,361 | 0,000199 | 2 | Gtpbp2    |
| 1,67E-08 | -0,4507  | 0,404 | 0,564 | 0,000206 | 2 | Akna      |
| 1,67E-08 | 0,279244 | 0,759 | 0,564 | 0,000206 | 2 | Caprin1   |
| 1,75E-08 | 0,2755   | 0,331 | 0,181 | 0,000216 | 2 | Cdca4     |
| 1,92E-08 | 0,263433 | 0,645 | 0,439 | 0,000238 | 2 | Eif3l     |
| 2,03E-08 | -0,38979 | 0,237 | 0,408 | 0,000252 | 2 | Vmn1r65   |
| 2,03E-08 | -0,46562 | 0,527 | 0,642 | 0,000252 | 2 | Ciita     |
| 2,13E-08 | -0,32054 | 0,122 | 0,285 | 0,000264 | 2 | Arap1     |
| 2,38E-08 | -0,28075 | 0,041 | 0,179 | 0,000295 | 2 | Pdcd4     |
| 2,39E-08 | 0,250889 | 0,767 | 0,581 | 0,000296 | 2 | Gna13     |
| 2,39E-08 | 0,268066 | 0,747 | 0,552 | 0,000296 | 2 | Ssb       |
| 2,48E-08 | 0,258021 | 0,498 | 0,313 | 0,000307 | 2 | Ndufv2    |
| 2,52E-08 | -0,33657 | 0,004 | 0,122 | 0,000312 | 2 | Sspn      |
| 2,74E-08 | -0,35832 | 0,016 | 0,142 | 0,000339 | 2 | Serpina3g |
| 3,07E-08 | -0,34042 | 0,122 | 0,285 | 0,00038  | 2 | Zmym2     |
| 3,1E-08  | -0,41863 | 0,445 | 0,585 | 0,000384 | 2 | Napsa     |
| 3,24E-08 | -0,46034 | 0,743 | 0,868 | 0,000401 | 2 | Apoe      |
| 3,3E-08  | 0,288253 | 0,771 | 0,595 | 0,000408 | 2 | Cct2      |
| 3,35E-08 | 0,253311 | 0,494 | 0,309 | 0,000415 | 2 | Nop10     |
| 3,41E-08 | 0,385464 | 0,412 | 0,256 | 0,000422 | 2 | Vpreb3    |
| 3,69E-08 | 0,255756 | 0,384 | 0,224 | 0,000456 | 2 | Nrm       |
| 3,94E-08 | -0,27363 | 0,012 | 0,133 | 0,000487 | 2 | Tmem154   |
| 3,98E-08 | -0,41483 | 0,224 | 0,382 | 0,000492 | 2 | Ikbkb     |
| 4,19E-08 | -0,33441 | 0,11  | 0,27  | 0,000519 | 2 | Aff3      |
| 4,6E-08  | 0,255069 | 0,539 | 0,362 | 0,00057  | 2 | Il21r     |
| 4,81E-08 | -0,27032 | 0,029 | 0,157 | 0,000595 | 2 | Il27ra    |
| 4,9E-08  | 0,259636 | 0,576 | 0,388 | 0,000606 | 2 | Slc25a4   |
| 4,93E-08 | 0,329777 | 0,335 | 0,188 | 0,000611 | 2 | Eif5a2    |
| 6,55E-08 | -0,38542 | 0,155 | 0,317 | 0,000811 | 2 | Gimap7    |
| 6,78E-08 | 0,288732 | 0,669 | 0,485 | 0,000839 | 2 | Thrap3    |
| 7,68E-08 | 0,265801 | 0,514 | 0,335 | 0,000951 | 2 | Pkig      |
| 8,57E-08 | -0,39514 | 0,151 | 0,309 | 0,001061 | 2 | Cd84      |
| 8,79E-08 | -0,35218 | 0,216 | 0,382 | 0,001088 | 2 | Ip6k1     |
| 8,85E-08 | -0,30009 | 0,943 | 0,955 | 0,001096 | 2 | Arhgdib   |
| 9,4E-08  | -0,35317 | 0,376 | 0,534 | 0,001164 | 2 | Ptpn18    |
| 9,42E-08 | 0,250786 | 0,461 | 0,29  | 0,001167 | 2 | Snrpb2    |
| 9,76E-08 | -0,26595 | 0,004 | 0,113 | 0,001208 | 2 | Fam46a    |
| 9,92E-08 | -0,43644 | 0,241 | 0,404 | 0,001229 | 2 | Cbfa2t3   |
| 1E-07    | -0,3896  | 0,176 | 0,339 | 0,001243 | 2 | Trim30a   |
| 1,01E-07 | -0,44787 | 0,473 | 0,61  | 0,001245 | 2 | Etnk1     |
| 1,04E-07 | -0,30052 | 0,069 | 0,209 | 0,00129  | 2 | Sema4b    |
| 1,04E-07 | 0,257994 | 0,461 | 0,288 | 0,001292 | 2 | Mcmbp     |
| 1,05E-07 | -0,36146 | 0,102 | 0,254 | 0,001301 | 2 | Fam214a   |
| 1,07E-07 | -0,3434  | 0,016 | 0,133 | 0,00132  | 2 | Gbp7      |
| 1,09E-07 | -0,25149 | 0,012 | 0,126 | 0,001345 | 2 | Spn       |
| 1,12E-07 | -0,32893 | 0,135 | 0,29  | 0,001384 | 2 | Sdf2      |
| 1,18E-07 | -0,2886  | 0,078 | 0,22  | 0,00146  | 2 | Lgals8    |
| 1,2E-07  | -0,3728  | 0,633 | 0,73  | 0,001485 | 2 | Gpx1      |
| 1,29E-07 | -0,25353 | 0,02  | 0,139 | 0,001595 | 2 | Ski       |

|          |          |       |       |          |   |               |
|----------|----------|-------|-------|----------|---|---------------|
| 1,31E-07 | 0,252894 | 0,735 | 0,557 | 0,001627 | 2 | Ppp2ca        |
| 1,4E-07  | 0,258136 | 0,392 | 0,24  | 0,001729 | 2 | Ube2m         |
| 1,41E-07 | -0,28159 | 0,086 | 0,229 | 0,001747 | 2 | Suv420h1      |
| 1,44E-07 | 0,260178 | 0,612 | 0,423 | 0,001779 | 2 | Plek          |
| 1,48E-07 | -0,36431 | 0,118 | 0,267 | 0,001827 | 2 | Itpr1         |
| 1,57E-07 | -0,29716 | 0,086 | 0,228 | 0,001941 | 2 | Tle3          |
| 1,59E-07 | 0,428271 | 0,71  | 0,577 | 0,001965 | 2 | Hspa5         |
| 1,66E-07 | 0,265815 | 0,482 | 0,309 | 0,002055 | 2 | Sar1b         |
| 1,67E-07 | -0,32495 | 0,143 | 0,295 | 0,002065 | 2 | Rassf5        |
| 1,7E-07  | -0,31187 | 0,171 | 0,327 | 0,0021   | 2 | Dennd1c       |
| 1,91E-07 | -0,31238 | 0,143 | 0,298 | 0,002363 | 2 | Ppp3cc        |
| 1,97E-07 | -0,38762 | 0,184 | 0,335 | 0,002436 | 2 | Ssh2          |
| 2,2E-07  | -0,33567 | 0,286 | 0,434 | 0,002728 | 2 | Tug1          |
| 2,62E-07 | -0,28378 | 0,086 | 0,226 | 0,003238 | 2 | Rnf167        |
| 2,96E-07 | -0,33438 | 0,171 | 0,324 | 0,00366  | 2 | Trim12a       |
| 3,03E-07 | -0,39712 | 0,253 | 0,407 | 0,003746 | 2 | Chd7          |
| 3,24E-07 | -0,31334 | 0,163 | 0,317 | 0,00401  | 2 | 4930523C07Rik |
| 3,34E-07 | -0,39363 | 0,616 | 0,723 | 0,004139 | 2 | Akap13        |
| 3,43E-07 | 0,25077  | 1     | 0,991 | 0,004241 | 2 | Rpl15         |
| 3,55E-07 | 0,251041 | 0,669 | 0,506 | 0,004397 | 2 | Canx          |
| 3,7E-07  | -0,3058  | 0,045 | 0,168 | 0,004578 | 2 | Sfn8          |
| 3,74E-07 | -0,36366 | 0,151 | 0,296 | 0,004633 | 2 | Trim25        |
| 4,34E-07 | -0,30573 | 0,212 | 0,368 | 0,005369 | 2 | Baz2a         |
| 4,54E-07 | -0,34593 | 0,122 | 0,261 | 0,005625 | 2 | Mgat4a        |
| 4,89E-07 | -0,32421 | 0,135 | 0,281 | 0,006049 | 2 | St8sia4       |
| 5,06E-07 | -0,26833 | 0,098 | 0,235 | 0,006264 | 2 | Tmem229b      |
| 5,42E-07 | 0,267547 | 0,722 | 0,562 | 0,006705 | 2 | Mat2a         |
| 6,03E-07 | -0,32185 | 0,127 | 0,267 | 0,007468 | 2 | Plec          |
| 6,07E-07 | -0,28229 | 0,122 | 0,27  | 0,007511 | 2 | Cyth4         |
| 6,2E-07  | -0,40593 | 0,58  | 0,656 | 0,007679 | 2 | Gdi1          |
| 6,21E-07 | -0,38303 | 0,363 | 0,507 | 0,007685 | 2 | Irf2          |
| 6,26E-07 | -0,33134 | 0,131 | 0,273 | 0,007751 | 2 | Nfat5         |
| 6,78E-07 | -0,35316 | 0,155 | 0,298 | 0,008396 | 2 | Parp14        |
| 7,16E-07 | -0,41978 | 0,298 | 0,436 | 0,008858 | 2 | Mll3          |
| 7,48E-07 | -0,43529 | 0,237 | 0,373 | 0,009255 | 2 | Crebrf        |
| 7,53E-07 | -0,38663 | 0,224 | 0,373 | 0,009324 | 2 | Zfp292        |
| 7,59E-07 | -0,2924  | 0,069 | 0,197 | 0,009398 | 2 | Evi2a         |
| 7,67E-07 | -0,39003 | 0,347 | 0,475 | 0,009494 | 2 | Slc44a2       |
| 9,03E-07 | -0,32232 | 0,49  | 0,607 | 0,011183 | 2 | Pfdn5         |
| 9,53E-07 | 0,255905 | 0,967 | 0,944 | 0,011804 | 2 | Rps26         |
| 9,59E-07 | -0,2973  | 0,078 | 0,207 | 0,011878 | 2 | Vamp1         |
| 9,78E-07 | -0,35561 | 0,106 | 0,238 | 0,012106 | 2 | Phf21a        |
| 9,89E-07 | -0,27423 | 0,065 | 0,189 | 0,012239 | 2 | S1pr4         |
| 1E-06    | -0,29077 | 0,069 | 0,196 | 0,012388 | 2 | Il10rb        |
| 1,01E-06 | -0,34586 | 0,078 | 0,204 | 0,012552 | 2 | Kctd12        |
| 1,13E-06 | -0,26199 | 0,902 | 0,94  | 0,014029 | 2 | Rpl36         |
| 1,14E-06 | -0,42097 | 0,661 | 0,757 | 0,014155 | 2 | Bcl11a        |
| 1,22E-06 | -0,38072 | 0,151 | 0,287 | 0,01515  | 2 | Klf6          |
| 1,4E-06  | -0,28829 | 0,114 | 0,25  | 0,017307 | 2 | Hps3          |
| 1,47E-06 | -0,3397  | 0,824 | 0,844 | 0,018169 | 2 | Rbm39         |

|          |          |       |       |          |   |               |
|----------|----------|-------|-------|----------|---|---------------|
| 1,49E-06 | -0,26388 | 0,045 | 0,16  | 0,018425 | 2 | Cacna1i       |
| 1,61E-06 | -0,37043 | 0,339 | 0,478 | 0,019952 | 2 | Baz2b         |
| 1,68E-06 | -0,32632 | 0,184 | 0,325 | 0,02081  | 2 | Fli1          |
| 1,72E-06 | -0,35065 | 0,257 | 0,398 | 0,021288 | 2 | Btg2          |
| 1,74E-06 | -0,37352 | 0,71  | 0,779 | 0,021518 | 2 | Jak1          |
| 1,8E-06  | -0,33162 | 0,482 | 0,613 | 0,022282 | 2 | Ddx17         |
| 1,87E-06 | -0,39706 | 0,38  | 0,498 | 0,023168 | 2 | Mgea5         |
| 1,89E-06 | -0,3372  | 0,298 | 0,439 | 0,023415 | 2 | Jmjd1c        |
| 1,94E-06 | -0,42637 | 0,457 | 0,559 | 0,023978 | 2 | Lmbrd1        |
| 2,02E-06 | -0,25182 | 0,078 | 0,2   | 0,025003 | 2 | Mir690        |
| 2,09E-06 | -0,31901 | 0,171 | 0,315 | 0,025888 | 2 | Sgpl1         |
| 2,13E-06 | -0,275   | 0,012 | 0,107 | 0,026431 | 2 | Ptpn22        |
| 2,19E-06 | -0,34984 | 0,371 | 0,497 | 0,027087 | 2 | Ii16          |
| 2,24E-06 | -0,26399 | 0,061 | 0,177 | 0,027721 | 2 | 5830428M24Rik |
| 2,27E-06 | -0,35656 | 0,396 | 0,528 | 0,028152 | 2 | Gmip          |
| 2,34E-06 | -0,2899  | 0,118 | 0,25  | 0,028988 | 2 | Neu1          |
| 2,4E-06  | 0,2606   | 0,58  | 0,419 | 0,029702 | 2 | Pdia6         |
| 2,47E-06 | -0,37402 | 0,429 | 0,538 | 0,030557 | 2 | Dnajc7        |
| 2,79E-06 | -0,42052 | 0,278 | 0,405 | 0,03456  | 2 | Ctsc          |
| 2,92E-06 | -0,31727 | 0,282 | 0,422 | 0,036098 | 2 | Itn2          |
| 2,94E-06 | -0,357   | 0,265 | 0,4   | 0,036342 | 2 | Sptbn1        |
| 3,04E-06 | -0,25397 | 0,078 | 0,198 | 0,037642 | 2 | Card6         |
| 3,09E-06 | -0,39117 | 0,212 | 0,352 | 0,038199 | 2 | St3gal1       |
| 3,19E-06 | -0,33272 | 0,224 | 0,364 | 0,039485 | 2 | Mgrn1         |
| 3,24E-06 | -0,33382 | 0,567 | 0,677 | 0,040063 | 2 | Zc3h11a       |
| 3,26E-06 | -0,33027 | 0,143 | 0,275 | 0,040344 | 2 | Emp3          |
| 3,29E-06 | -0,38069 | 0,4   | 0,521 | 0,040763 | 2 | Gpr18         |
| 3,37E-06 | -0,25427 | 0,012 | 0,104 | 0,041759 | 2 | Fcrl5         |
| 3,4E-06  | -0,40224 | 0,78  | 0,807 | 0,042122 | 2 | Gabarap       |
| 3,5E-06  | -0,34595 | 0,327 | 0,454 | 0,043324 | 2 | Ogt           |
| 3,5E-06  | -0,28157 | 0,155 | 0,295 | 0,043333 | 2 | Cep350        |
| 3,53E-06 | -0,25894 | 0,114 | 0,246 | 0,043666 | 2 | Clec2g        |
| 3,57E-06 | -0,27284 | 0,102 | 0,228 | 0,044225 | 2 | Cnr2          |
| 3,87E-06 | -0,37158 | 0,494 | 0,6   | 0,047871 | 2 | Fmnl1         |
| 3,99E-06 | -0,39129 | 0,363 | 0,472 | 0,049345 | 2 | Dgkd          |
| 4,03E-06 | 0,251231 | 0,824 | 0,649 | 0,049911 | 2 | Cnbp          |
| 4,49E-06 | -0,2873  | 0,514 | 0,617 | 0,055558 | 2 | Myh9          |
| 4,54E-06 | -0,27121 | 0,082 | 0,203 | 0,056239 | 2 | Mbnl2         |
| 4,54E-06 | -0,34514 | 0,514 | 0,616 | 0,056257 | 2 | Gltscr2       |
| 4,61E-06 | -0,25585 | 0,094 | 0,214 | 0,057089 | 2 | Dcaf11        |
| 5,07E-06 | -0,34255 | 0,294 | 0,421 | 0,062724 | 2 | Zcchc7        |
| 5,66E-06 | -0,29992 | 0,151 | 0,279 | 0,070055 | 2 | Pcf11         |
| 5,88E-06 | -0,37826 | 0,567 | 0,638 | 0,072761 | 2 | Wipf1         |
| 5,95E-06 | -0,26634 | 0,122 | 0,249 | 0,073683 | 2 | Acp5          |
| 6,45E-06 | -0,37229 | 0,498 | 0,581 | 0,0799   | 2 | H2-Eb2        |
| 6,62E-06 | -0,28882 | 0,176 | 0,308 | 0,081918 | 2 | Cbx7          |
| 6,8E-06  | -0,32409 | 0,18  | 0,309 | 0,084243 | 2 | Tmem173       |
| 7,39E-06 | -0,35013 | 0,237 | 0,361 | 0,091499 | 2 | Nedd9         |
| 8,81E-06 | -0,40929 | 0,731 | 0,804 | 0,109031 | 2 | 6820431F20Rik |
| 9,24E-06 | -0,35566 | 0,694 | 0,766 | 0,114351 | 2 | Grk6          |

|          |          |       |       |          |     |          |
|----------|----------|-------|-------|----------|-----|----------|
| 9,97E-06 | -0,26847 | 0,943 | 0,97  | 0,123438 | 2   | Ptprcap  |
| 1,01E-05 | -0,30842 | 0,257 | 0,393 | 0,12565  | 2   | Sorl1    |
| 1,06E-05 | -0,35826 | 0,359 | 0,474 | 0,130651 | 2   | Il17ra   |
| 1,22E-05 | -0,41305 | 0,29  | 0,403 | 0,151374 | 2   | Trim26   |
| 1,23E-05 | -0,35135 | 0,306 | 0,433 | 0,152103 | 2   | Ash1l    |
| 1,23E-05 | -0,39497 | 0,245 | 0,372 | 0,152832 | 2   | Abhd17b  |
| 1,24E-05 | -0,29174 | 0,224 | 0,362 | 0,154099 | 2   | Atp6ap1  |
| 1,45E-05 | -0,25705 | 0,135 | 0,255 | 0,179294 | 2   | Slfn9    |
| 1,49E-05 | -0,34029 | 0,702 | 0,778 | 0,184201 | 2   | Rasgrp3  |
| 1,55E-05 | -0,35036 | 0,657 | 0,706 | 0,19202  | 2   | Ctsh     |
| 1,58E-05 | -0,33861 | 0,437 | 0,545 | 0,196087 | 2   | Wdfy4    |
| 1,75E-05 | -0,27905 | 0,094 | 0,207 | 0,216559 | 2   | Camta2   |
| 1,8E-05  | -0,28827 | 0,22  | 0,351 | 0,222985 | 2   | Arid4b   |
| 1,92E-05 | -0,30547 | 0,322 | 0,437 | 0,237091 | 2   | Gpsm3    |
| 2,08E-05 | -0,3514  | 0,282 | 0,404 | 0,257592 | 2   | Kdm5a    |
| 2,13E-05 | -0,34971 | 0,09  | 0,202 | 0,263483 | 2   | Ms4a4c   |
| 2,21E-05 | -0,33124 | 0,298 | 0,419 | 0,273867 | 2   | Itpr2    |
| 2,25E-05 | -0,26593 | 0,18  | 0,304 | 0,27869  | 2   | Cdc42se1 |
| 2,28E-05 | -0,33034 | 0,416 | 0,534 | 0,282383 | 2   | Med13    |
| 2,47E-05 | -0,34993 | 0,22  | 0,342 | 0,305249 | 2   | Pde4b    |
| 2,74E-05 | -0,26059 | 0,229 | 0,354 | 0,339324 | 2   | Cdc42se2 |
| 2,83E-05 | -0,33509 | 0,698 | 0,735 | 0,349882 | 2   | Tmbim6   |
| 2,91E-05 | -0,28983 | 0,147 | 0,261 | 0,360149 | 2   | lqsec1   |
| 3,03E-05 | -0,28472 | 0,159 | 0,277 | 0,375446 | 2   | Ifngr2   |
| 3,05E-05 | -0,26256 | 0,131 | 0,246 | 0,377522 | 2   | Ints4    |
| 3,3E-05  | -0,26832 | 0,984 | 0,993 | 0,408874 | 2   | Srgn     |
| 3,45E-05 | -0,27179 | 0,065 | 0,165 | 0,427028 | 2   | Marcks   |
| 3,62E-05 | -0,35663 | 0,612 | 0,676 | 0,448387 | 2   | Dock8    |
| 3,87E-05 | -0,28919 | 0,241 | 0,366 | 0,478984 | 2   | Klf13    |
| 3,93E-05 | -0,29067 | 0,122 | 0,235 | 0,486966 | 2   | Cdk19    |
| 4E-05    | -0,30664 | 0,869 | 0,881 | 0,494783 | 2   | Apobec3  |
| 4,03E-05 | -0,32258 | 0,494 | 0,593 | 0,49936  | 2   | Dock2    |
| 4,19E-05 | -0,26763 | 0,282 | 0,399 | 0,51885  | 2   | Gpcpd1   |
| 4,26E-05 | -0,29724 | 0,6   | 0,663 | 0,527482 | 2   | Srsf5    |
| 5E-05    | -0,31468 | 0,527 | 0,594 | 0,618859 | 2   | Ddx6     |
| 5,16E-05 | -0,27049 | 0,392 | 0,494 | 0,6387   | 2   | Man2b1   |
| 5,21E-05 | -0,33329 | 0,792 | 0,892 | 0,644559 | 2   | Mir5109  |
| 5,27E-05 | -0,34288 | 0,367 | 0,488 | 0,652216 | 2   | Stat3    |
| 5,3E-05  | -0,34966 | 0,273 | 0,389 | 0,656031 | 2   | Tmem30a  |
| 5,52E-05 | -0,38093 | 0,433 | 0,52  | 0,683074 | 2   | Cd47     |
| 6,24E-05 | -0,25583 | 0,963 | 0,974 | 0,773103 | 2   | Serp1    |
| 6,76E-05 | -0,32487 | 0,396 | 0,501 | 0,836385 | 2   | Sh3bp5   |
| 7,14E-05 | -0,26311 | 0,106 | 0,208 | 0,884414 | 2   | Phc3     |
| 7,71E-05 | -0,29699 | 0,237 | 0,349 | 0,954918 | 2   | Adcy7    |
| 7,9E-05  | -0,34695 | 0,351 | 0,465 | 0,978388 | 2   | Syne1    |
| 8,28E-05 | -0,2789  | 0,306 | 0,421 |          | 1 2 | Cd44     |
| 8,4E-05  | -0,29751 | 0,771 | 0,84  |          | 1 2 | Sipa1    |
| 8,62E-05 | -0,25658 | 0,771 | 0,789 |          | 1 2 | Mbnl1    |
| 8,92E-05 | -0,34858 | 0,71  | 0,74  |          | 1 2 | Cybb     |
| 9,21E-05 | -0,28061 | 0,612 | 0,698 |          | 1 2 | Smap2    |

|          |          |       |       |     |               |
|----------|----------|-------|-------|-----|---------------|
| 9,22E-05 | -0,31272 | 0,159 | 0,264 | 1 2 | Plekhm3       |
| 9,85E-05 | -0,25283 | 0,155 | 0,264 | 1 2 | Clec2d        |
| 0,000105 | -0,30054 | 0,286 | 0,386 | 1 2 | Lpgat1        |
| 0,000109 | -0,28503 | 0,171 | 0,279 | 1 2 | Atp5sl        |
| 0,00011  | -0,29648 | 0,416 | 0,514 | 1 2 | Vasp          |
| 0,000115 | -0,29988 | 0,49  | 0,572 | 1 2 | Rcsd1         |
| 0,000132 | -0,29292 | 0,482 | 0,576 | 1 2 | Pnrc2         |
| 0,000139 | -0,33999 | 0,412 | 0,506 | 1 2 | Srpk3         |
| 0,000157 | -0,2528  | 0,102 | 0,198 | 1 2 | Morc3         |
| 0,000159 | -0,27997 | 0,596 | 0,66  | 1 2 | Myo1g         |
| 0,000164 | -0,25589 | 0,278 | 0,407 | 1 2 | Zfp36         |
| 0,000171 | -0,28388 | 0,151 | 0,255 | 1 2 | Glcci1        |
| 0,000175 | -0,3668  | 0,302 | 0,395 | 1 2 | Clic4         |
| 0,000181 | -0,26334 | 0,208 | 0,315 | 1 2 | Tmem59        |
| 0,000191 | -0,29642 | 0,155 | 0,26  | 1 2 | Irf1          |
| 0,0002   | -0,32316 | 0,437 | 0,508 | 1 2 | Tnrc6a        |
| 0,000203 | -0,28022 | 0,384 | 0,481 | 1 2 | BC017643      |
| 0,000208 | -0,28415 | 0,176 | 0,276 | 1 2 | Zzef1         |
| 0,000213 | -0,27449 | 0,212 | 0,312 | 1 2 | Vamp2         |
| 0,000223 | -0,28869 | 0,641 | 0,7   | 1 2 | Ets1          |
| 0,000227 | -0,25711 | 0,278 | 0,39  | 1 2 | Elf4          |
| 0,000228 | -0,30071 | 0,527 | 0,585 | 1 2 | Prr13         |
| 0,000231 | -0,30068 | 0,196 | 0,294 | 1 2 | Aplf          |
| 0,000233 | -0,36406 | 0,192 | 0,291 | 1 2 | Sh2d3c        |
| 0,000236 | -0,31263 | 0,2   | 0,295 | 1 2 | Esyt1         |
| 0,00024  | -0,28724 | 0,31  | 0,416 | 1 2 | Zc3h7a        |
| 0,000258 | -0,29982 | 0,469 | 0,568 | 1 2 | Ankrd12       |
| 0,000269 | -0,27843 | 0,188 | 0,288 | 1 2 | Irf9          |
| 0,000275 | -0,28119 | 0,404 | 0,496 | 1 2 | Kdm2a         |
| 0,000279 | -0,27418 | 0,857 | 0,895 | 1 2 | Mef2c         |
| 0,000327 | 0,256064 | 0,531 | 0,423 | 1 2 | Ddx21         |
| 0,000334 | -0,27786 | 0,184 | 0,281 | 1 2 | Gm15800       |
| 0,000335 | -0,34259 | 0,253 | 0,359 | 1 2 | Nfatc1        |
| 0,00034  | -0,27951 | 0,237 | 0,335 | 1 2 | Phf14         |
| 0,000365 | -0,25328 | 0,196 | 0,295 | 1 2 | D14Abb1e      |
| 0,000375 | -0,30427 | 0,31  | 0,404 | 1 2 | Add1          |
| 0,000422 | -0,34229 | 0,327 | 0,425 | 1 2 | Stk24         |
| 0,000435 | -0,25659 | 0,551 | 0,63  | 1 2 | Atp2a3        |
| 0,00045  | -0,29012 | 0,38  | 0,468 | 1 2 | Eif4g3        |
| 0,000458 | -0,26551 | 0,776 | 0,804 | 1 2 | Nsa2          |
| 0,00048  | -0,28344 | 0,412 | 0,474 | 1 2 | Tmem50a       |
| 0,000519 | -0,28043 | 0,261 | 0,355 | 1 2 | Pik3ca        |
| 0,00052  | -0,29906 | 0,494 | 0,567 | 1 2 | Crif3         |
| 0,000541 | -0,2953  | 0,224 | 0,319 | 1 2 | Zmiz1         |
| 0,000543 | -0,29091 | 0,767 | 0,805 | 1 2 | Ly86          |
| 0,000551 | -0,28376 | 0,547 | 0,602 | 1 2 | Cst3          |
| 0,000573 | -0,29936 | 0,322 | 0,404 | 1 2 | Icosl         |
| 0,000599 | -0,31693 | 0,294 | 0,38  | 1 2 | Slc4a7        |
| 0,000615 | -0,31022 | 0,343 | 0,43  | 1 2 | Stk38         |
| 0,000633 | -0,32369 | 0,253 | 0,338 | 1 2 | 4932438A13Rik |



|          |          |       |       |            |         |
|----------|----------|-------|-------|------------|---------|
| 0,000644 | -0,28676 | 0,269 | 0,359 | 1 2        | Nxpe3   |
| 0,000647 | -0,28115 | 0,269 | 0,357 | 1 2        | Zkscan3 |
| 0,000655 | -0,26185 | 0,249 | 0,348 | 1 2        | Scd2    |
| 0,00067  | -0,27786 | 0,176 | 0,267 | 1 2        | Wdfy1   |
| 0,00072  | -0,26851 | 0,637 | 0,685 | 1 2        | Cox7a2l |
| 0,00074  | -0,25102 | 0,306 | 0,394 | 1 2        | Zdhhc20 |
| 0,00077  | -0,32927 | 0,376 | 0,45  | 1 2        | Ubr4    |
| 0,000849 | -0,28345 | 0,567 | 0,602 | 1 2        | Ncor1   |
| 0,000895 | -0,27232 | 0,51  | 0,582 | 1 2        | Tapbp   |
| 0,00093  | -0,26125 | 0,269 | 0,361 | 1 2        | Gm7609  |
| 0,000982 | -0,27862 | 0,457 | 0,543 | 1 2        | Sqstm1  |
| 0,00121  | -0,28645 | 0,486 | 0,555 | 1 2        | Cr2     |
| 0,001477 | -0,27507 | 0,273 | 0,353 | 1 2        | Tax1bp1 |
| 0,001568 | -0,25922 | 0,31  | 0,386 | 1 2        | Zbtb7a  |
| 0,001627 | -0,25509 | 0,257 | 0,342 | 1 2        | Nisch   |
| 0,001928 | -0,26227 | 0,188 | 0,274 | 1 2        | Sfi1    |
| 0,001929 | -0,25813 | 0,302 | 0,377 | 1 2        | Itgal   |
| 0,001958 | -0,26063 | 0,355 | 0,444 | 1 2        | Ccdc82  |
| 0,002384 | -0,26135 | 0,314 | 0,395 | 1 2        | Ubn2    |
| 0,002879 | -0,28956 | 0,314 | 0,391 | 1 2        | Mia3    |
| 0,003195 | -0,25801 | 0,322 | 0,398 | 1 2        | Bin2    |
| 0,003414 | -0,27882 | 0,453 | 0,524 | 1 2        | Akap8   |
| 0,003493 | -0,27614 | 0,465 | 0,537 | 1 2        | Sat1    |
| 0,003607 | -0,29411 | 0,706 | 0,758 | 1 2        | Ptp4a3  |
| 0,00396  | -0,25323 | 0,535 | 0,585 | 1 2        | Zcchc11 |
| 0,004306 | -0,31132 | 0,351 | 0,416 | 1 2        | Rhof    |
| 0,004813 | -0,25171 | 0,229 | 0,299 | 1 2        | Galnt11 |
| 0,004914 | -0,25372 | 0,482 | 0,536 | 1 2        | Tap1    |
| 0,005472 | -0,27021 | 0,294 | 0,363 | 1 2        | Bnip3l  |
| 0,007073 | -0,25954 | 0,188 | 0,254 | 1 2        | Parm1   |
| 0,007136 | -0,28118 | 0,188 | 0,258 | 1 2        | Gbp4    |
| 0,008803 | -0,25389 | 0,963 | 0,964 | 1 2        | mtNd4l  |
| 0,008968 | -0,46765 | 0,514 | 0,521 | 1 2        | Stat1   |
| 1,57E-91 | 1,062268 | 0,5   | 0,052 | 1,95E-87 3 | Ptpn22  |
| 2,33E-89 | 1,620162 | 0,691 | 0,134 | 2,88E-85 3 | Plac8   |
| 1,14E-83 | 0,627115 | 0,388 | 0,029 | 1,41E-79 3 | Zbtb32  |
| 1,51E-67 | 0,885473 | 0,436 | 0,056 | 1,87E-63 3 | Fcrl5   |
| 8,28E-64 | 0,689308 | 0,388 | 0,045 | 1,03E-59 3 | Ptprj   |
| 1,53E-59 | 0,68561  | 0,346 | 0,037 | 1,9E-55 3  | Nid1    |
| 5,82E-59 | 0,855683 | 0,527 | 0,099 | 7,2E-55 3  | Ahnak   |
| 7,5E-52  | 0,624062 | 0,351 | 0,047 | 9,29E-48 3 | Csf2rb  |
| 2,18E-47 | 0,708797 | 0,511 | 0,114 | 2,69E-43 3 | Cd38    |
| 9,7E-46  | 0,911506 | 0,489 | 0,117 | 1,2E-41 3  | Marcks  |
| 4,33E-43 | 1,04787  | 0,931 | 0,486 | 5,36E-39 3 | Ly6d    |
| 2,35E-40 | 0,684696 | 0,394 | 0,08  | 2,91E-36 3 | Sla     |
| 1,1E-39  | -1,54489 | 0,309 | 0,746 | 1,36E-35 3 | Basp1   |
| 9,4E-38  | 0,85073  | 0,521 | 0,153 | 1,16E-33 3 | Kctd12  |
| 8,37E-37 | 0,897137 | 0,814 | 0,381 | 1,04E-32 3 | Sub1    |
| 1,07E-36 | 0,416314 | 0,165 | 0,011 | 1,33E-32 3 | Actn1   |
| 4,95E-34 | 0,817836 | 0,617 | 0,231 | 6,13E-30 3 | Fgd2    |

|          |          |       |       |          |   |         |
|----------|----------|-------|-------|----------|---|---------|
| 1,05E-33 | 1,032585 | 0,846 | 0,487 | 1,31E-29 | 3 | Foxp1   |
| 9,8E-30  | 0,35477  | 0,197 | 0,025 | 1,21E-25 | 3 | Rin3    |
| 1,66E-29 | -0,89351 | 0,995 | 1     | 2,05E-25 | 3 | Cfl1    |
| 3,01E-29 | 1,082341 | 0,649 | 0,314 | 3,73E-25 | 3 | Nfatc1  |
| 3,86E-29 | 0,57128  | 0,463 | 0,138 | 4,77E-25 | 3 | Cd97    |
| 1,25E-28 | 0,76376  | 0,766 | 0,42  | 1,55E-24 | 3 | Psap    |
| 1,4E-28  | -1,46783 | 0,351 | 0,699 | 1,73E-24 | 3 | Igj     |
| 2,93E-27 | 0,337737 | 0,128 | 0,01  | 3,63E-23 | 3 | Ccr1    |
| 5,42E-27 | 0,649404 | 0,995 | 0,979 | 6,71E-23 | 3 | H2-K1   |
| 8,2E-27  | 0,847629 | 0,649 | 0,29  | 1,02E-22 | 3 | Bcl2    |
| 4,3E-26  | 0,551656 | 0,346 | 0,092 | 5,32E-22 | 3 | Mpeg1   |
| 9,77E-26 | 0,47772  | 0,282 | 0,062 | 1,21E-21 | 3 | Fam129c |
| 4,11E-25 | -0,7549  | 0,926 | 0,987 | 5,09E-21 | 3 | Laptm5  |
| 4,91E-25 | 0,722169 | 0,723 | 0,357 | 6,07E-21 | 3 | Snn     |
| 7,13E-25 | -1,01519 | 0,096 | 0,482 | 8,82E-21 | 3 | Bcl6    |
| 5,6E-24  | 0,289098 | 0,176 | 0,025 | 6,93E-20 | 3 | Mcoln2  |
| 4,47E-23 | 0,541106 | 0,282 | 0,071 | 5,54E-19 | 3 | Emb     |
| 4,6E-23  | 0,505527 | 0,324 | 0,09  | 5,69E-19 | 3 | Spn     |
| 6,86E-23 | 0,515311 | 0,335 | 0,095 | 8,49E-19 | 3 | Tmem154 |
| 1,14E-22 | 0,31662  | 0,16  | 0,022 | 1,41E-18 | 3 | Dpp4    |
| 1,28E-22 | 0,576914 | 1     | 0,988 | 1,59E-18 | 3 | H2-D1   |
| 2,15E-22 | 0,439835 | 0,25  | 0,056 | 2,66E-18 | 3 | Fgl2    |
| 2,87E-22 | 0,586329 | 0,66  | 0,311 | 3,56E-18 | 3 | Map3k1  |
| 3,33E-22 | 0,65985  | 0,532 | 0,225 | 4,12E-18 | 3 | Cyp4f18 |
| 5,14E-22 | -1,11873 | 0,122 | 0,484 | 6,36E-18 | 3 | Rgs13   |
| 9,54E-22 | 0,53316  | 0,33  | 0,098 | 1,18E-17 | 3 | Cd72    |
| 1,33E-21 | 0,661852 | 0,479 | 0,188 | 1,64E-17 | 3 | S1pr1   |
| 1,64E-21 | 0,363983 | 0,266 | 0,065 | 2,03E-17 | 3 | Aff1    |
| 1,84E-21 | 0,932296 | 0,926 | 0,78  | 2,28E-17 | 3 | Faim3   |
| 1,98E-21 | 0,265667 | 0,144 | 0,019 | 2,45E-17 | 3 | Cd1d1   |
| 4,33E-21 | 0,629669 | 0,995 | 0,811 | 5,36E-17 | 3 | Shisa5  |
| 4,38E-21 | 0,713699 | 0,835 | 0,545 | 5,42E-17 | 3 | Bank1   |
| 6E-21    | 0,580733 | 0,399 | 0,14  | 7,43E-17 | 3 | Bhlhe41 |
| 7,42E-21 | -0,99728 | 0,181 | 0,524 | 9,18E-17 | 3 | Mef2b   |
| 8,13E-21 | 0,774622 | 0,543 | 0,254 | 1,01E-16 | 3 | Aplf    |
| 8,18E-21 | 0,293041 | 0,245 | 0,056 | 1,01E-16 | 3 | Lilrb3  |
| 8,72E-21 | 0,760219 | 0,91  | 0,711 | 1,08E-16 | 3 | Ly6a    |
| 1,98E-20 | 0,622644 | 0,92  | 0,651 | 2,45E-16 | 3 | Gimap4  |
| 2,45E-20 | 0,262823 | 0,117 | 0,012 | 3,03E-16 | 3 | Ppap2b  |
| 2,76E-20 | -0,86214 | 0,117 | 0,461 | 3,41E-16 | 3 | S1pr2   |
| 6,51E-20 | 0,533832 | 0,824 | 0,441 | 8,06E-16 | 3 | Ifi203  |
| 1,51E-19 | -0,69269 | 0,66  | 0,865 | 1,87E-15 | 3 | Sypl    |
| 1,61E-19 | 0,273154 | 0,149 | 0,023 | 1,99E-15 | 3 | Hck     |
| 2,29E-19 | 0,646648 | 0,995 | 0,97  | 2,84E-15 | 3 | Malat1  |
| 2,8E-19  | 0,738471 | 0,66  | 0,361 | 3,47E-15 | 3 | Gns     |
| 2,82E-19 | 0,637322 | 0,793 | 0,507 | 3,49E-15 | 3 | Gimap3  |
| 2,86E-19 | 0,353572 | 0,335 | 0,104 | 3,54E-15 | 3 | Plbd1   |
| 4,05E-19 | 0,310052 | 0,218 | 0,05  | 5,01E-15 | 3 | Aldh3b1 |
| 8,8E-19  | 0,677303 | 0,745 | 0,467 | 1,09E-14 | 3 | Itga4   |
| 1,01E-18 | -0,88566 | 0,133 | 0,457 | 1,25E-14 | 3 | Gcsam   |

|          |          |       |       |            |               |
|----------|----------|-------|-------|------------|---------------|
| 1,13E-18 | -0,85244 | 0,473 | 0,719 | 1,4E-14 3  | Txn1          |
| 1,3E-18  | 0,558573 | 0,782 | 0,433 | 1,61E-14 3 | Pml           |
| 1,58E-18 | 0,250376 | 0,207 | 0,046 | 1,96E-14 3 | Adam19        |
| 2,89E-18 | 0,580613 | 0,819 | 0,465 | 3,57E-14 3 | Mndal         |
| 3,45E-18 | 0,458415 | 0,388 | 0,143 | 4,27E-14 3 | Inpp5f        |
| 4,28E-18 | 0,320062 | 0,181 | 0,036 | 5,3E-14 3  | Arhgap24      |
| 5,76E-18 | -0,69527 | 0,457 | 0,714 | 7,13E-14 3 | Arpc5l        |
| 1,03E-17 | 0,614378 | 0,537 | 0,266 | 1,28E-13 3 | Jhdm1d        |
| 1,05E-17 | 0,328631 | 0,218 | 0,054 | 1,3E-13 3  | Sirpa         |
| 1,21E-17 | -0,88523 | 0,234 | 0,532 | 1,49E-13 3 | Aicda         |
| 1,27E-17 | 0,516353 | 0,713 | 0,376 | 1,57E-13 3 | Klf2          |
| 1,29E-17 | 0,44347  | 1     | 0,995 | 1,6E-13 3  | B2m           |
| 3,14E-17 | 0,430847 | 0,277 | 0,083 | 3,88E-13 3 | Ephx1         |
| 4,72E-17 | 0,794878 | 0,883 | 0,721 | 5,84E-13 3 | Cybb          |
| 8,73E-17 | 0,391017 | 0,362 | 0,132 | 1,08E-12 3 | Arhgef3       |
| 1,3E-16  | 0,583227 | 0,665 | 0,392 | 1,62E-12 3 | S100a11       |
| 1,62E-16 | 0,348384 | 0,207 | 0,052 | 2,01E-12 3 | Cd300lf       |
| 1,96E-16 | 0,467553 | 0,516 | 0,241 | 2,42E-12 3 | Man1a         |
| 3,71E-16 | 0,652239 | 0,899 | 0,728 | 4,59E-12 3 | Fcrla         |
| 5,78E-16 | 0,567883 | 0,75  | 0,455 | 7,16E-12 3 | Fam65b        |
| 6,62E-16 | -0,48062 | 0,973 | 0,998 | 8,19E-12 3 | Tmsb10        |
| 1,07E-15 | 0,300104 | 0,218 | 0,059 | 1,32E-11 3 | Rilpl2        |
| 1,85E-15 | 0,507161 | 0,473 | 0,22  | 2,29E-11 3 | Notch2        |
| 2,3E-15  | 0,473853 | 0,654 | 0,364 | 2,84E-11 3 | Dgka          |
| 3,19E-15 | 0,484523 | 0,59  | 0,307 | 3,95E-11 3 | S100a10       |
| 3,55E-15 | 0,436263 | 0,33  | 0,123 | 4,4E-11 3  | Trim30b       |
| 3,88E-15 | 0,609565 | 0,654 | 0,401 | 4,8E-11 3  | Ncf1          |
| 4,08E-15 | 0,387566 | 0,17  | 0,039 | 5,05E-11 3 | Dnase1l3      |
| 4,62E-15 | -0,53709 | 0,021 | 0,289 | 5,71E-11 3 | Nuggc         |
| 5,3E-15  | -1,10151 | 0,218 | 0,487 | 6,56E-11 3 | Hmgb2         |
| 7,86E-15 | 0,282051 | 0,149 | 0,03  | 9,73E-11 3 | Tmem163       |
| 8,1E-15  | -0,71095 | 0,356 | 0,608 | 1E-10 3    | Mbd2          |
| 9,26E-15 | 0,376995 | 1     | 0,999 | 1,15E-10 3 | Ly6e          |
| 1,17E-14 | 0,371239 | 0,16  | 0,036 | 1,45E-10 3 | S100a6        |
| 1,24E-14 | 0,388244 | 0,298 | 0,106 | 1,53E-10 3 | Ski           |
| 1,56E-14 | 0,52586  | 0,324 | 0,125 | 1,93E-10 3 | Grn           |
| 1,8E-14  | 0,505662 | 0,665 | 0,383 | 2,22E-10 3 | Add3          |
| 2,38E-14 | 0,487881 | 0,644 | 0,375 | 2,95E-10 3 | Ubl3          |
| 4,54E-14 | 0,52081  | 0,463 | 0,218 | 5,62E-10 3 | Cd55          |
| 6,22E-14 | 0,512296 | 0,83  | 0,552 | 7,71E-10 3 | Cmah          |
| 7,49E-14 | -0,642   | 0,66  | 0,797 | 9,27E-10 3 | Anp32b        |
| 1,04E-13 | 0,549015 | 0,495 | 0,261 | 1,28E-09 3 | Esyt1         |
| 1,1E-13  | -0,62638 | 0,755 | 0,887 | 1,36E-09 3 | Stt3b         |
| 1,19E-13 | 0,435085 | 0,67  | 0,38  | 1,48E-09 3 | Capg          |
| 1,23E-13 | -0,65674 | 0,335 | 0,596 | 1,52E-09 3 | Tmem131       |
| 1,41E-13 | 1,30572  | 0,979 | 0,939 | 1,74E-09 3 | A630089N07Rik |
| 1,65E-13 | 0,586228 | 0,91  | 0,752 | 2,04E-09 3 | Prkcb         |
| 2,06E-13 | 0,416971 | 0,436 | 0,205 | 2,56E-09 3 | Neat1         |
| 2,42E-13 | 0,422255 | 0,271 | 0,097 | 2,99E-09 3 | Ceacam1       |
| 3,22E-13 | -0,58541 | 0,085 | 0,34  | 3,99E-09 3 | Eaf2          |

|          |          |       |       |          |   |               |
|----------|----------|-------|-------|----------|---|---------------|
| 3,86E-13 | 0,27372  | 0,266 | 0,092 | 4,77E-09 | 3 | Fam43a        |
| 5,93E-13 | -0,88104 | 0,601 | 0,753 | 7,35E-09 | 3 | Hmgn2         |
| 5,98E-13 | -0,6074  | 0,154 | 0,412 | 7,4E-09  | 3 | Anxa2         |
| 6,96E-13 | -0,47954 | 0,851 | 0,939 | 8,62E-09 | 3 | Psmb8         |
| 8,36E-13 | 0,422832 | 0,42  | 0,194 | 1,03E-08 | 3 | Arhgef18      |
| 1,13E-12 | 0,444189 | 0,606 | 0,366 | 1,4E-08  | 3 | 2310034O05Rik |
| 1,24E-12 | 0,337196 | 0,229 | 0,076 | 1,54E-08 | 3 | Prkca         |
| 1,32E-12 | 0,405565 | 0,314 | 0,127 | 1,63E-08 | 3 | Cacna1i       |
| 1,66E-12 | 0,566373 | 0,66  | 0,426 | 2,05E-08 | 3 | Nfkb1         |
| 1,72E-12 | -0,66897 | 0,447 | 0,663 | 2,13E-08 | 3 | Erp44         |
| 1,89E-12 | 0,458402 | 0,489 | 0,261 | 2,34E-08 | 3 | Fcgr2b        |
| 2,37E-12 | 0,369588 | 0,356 | 0,155 | 2,93E-08 | 3 | Itm2c         |
| 2,97E-12 | 1,421432 | 1     | 0,967 | 3,67E-08 | 3 | Gm17821       |
| 3,13E-12 | 0,520634 | 0,713 | 0,493 | 3,88E-08 | 3 | Itm2b         |
| 4,05E-12 | -0,50258 | 0,037 | 0,268 | 5,01E-08 | 3 | Parm1         |
| 4,07E-12 | 0,415707 | 0,388 | 0,187 | 5,04E-08 | 3 | Sbk1          |
| 4,85E-12 | 0,456911 | 0,957 | 0,809 | 6,01E-08 | 3 | Macf1         |
| 5,47E-12 | -0,55348 | 0,213 | 0,456 | 6,77E-08 | 3 | Phf6          |
| 6,99E-12 | -0,6762  | 0,367 | 0,6   | 8,66E-08 | 3 | Klhl6         |
| 7,05E-12 | 0,389786 | 0,287 | 0,114 | 8,73E-08 | 3 | Ahcyl2        |
| 7,49E-12 | -0,64076 | 0,309 | 0,551 | 9,27E-08 | 3 | Mtf2          |
| 7,52E-12 | -0,61863 | 0,229 | 0,477 | 9,31E-08 | 3 | Dck           |
| 8,26E-12 | -0,59073 | 0,436 | 0,656 | 1,02E-07 | 3 | Hmgn1         |
| 8,99E-12 | -0,659   | 0,165 | 0,411 | 1,11E-07 | 3 | Lpp           |
| 1,07E-11 | 0,452993 | 0,585 | 0,347 | 1,33E-07 | 3 | Cyb561a3      |
| 1,21E-11 | 0,28031  | 0,149 | 0,038 | 1,5E-07  | 3 | Zfp385a       |
| 1,21E-11 | -0,47889 | 0,085 | 0,321 | 1,5E-07  | 3 | Rassf6        |
| 1,26E-11 | 0,336857 | 0,255 | 0,095 | 1,55E-07 | 3 | Zmynd11       |
| 1,29E-11 | 0,394717 | 0,447 | 0,229 | 1,6E-07  | 3 | Aff3          |
| 1,37E-11 | -0,58712 | 0,67  | 0,808 | 1,7E-07  | 3 | Pou2af1       |
| 1,4E-11  | 0,287307 | 0,197 | 0,061 | 1,74E-07 | 3 | Faah          |
| 1,63E-11 | 0,274271 | 0,17  | 0,048 | 2,02E-07 | 3 | Il10ra        |
| 1,64E-11 | -0,92865 | 0,176 | 0,405 | 2,03E-07 | 3 | Stmn1         |
| 1,71E-11 | 0,390978 | 0,356 | 0,163 | 2,12E-07 | 3 | Evi2a         |
| 1,9E-11  | -0,54013 | 0,505 | 0,687 | 2,35E-07 | 3 | Cox6a1        |
| 1,94E-11 | 0,415526 | 0,782 | 0,531 | 2,4E-07  | 3 | Samd9l        |
| 2,04E-11 | -0,42306 | 0,952 | 0,99  | 2,53E-07 | 3 | Gnas          |
| 2,12E-11 | -0,50137 | 0,654 | 0,803 | 2,62E-07 | 3 | Slc25a5       |
| 2,47E-11 | 0,348589 | 0,452 | 0,228 | 3,06E-07 | 3 | Cdkn1b        |
| 3,19E-11 | -0,59654 | 0,261 | 0,477 | 3,95E-07 | 3 | Rfc1          |
| 3,6E-11  | -0,53047 | 0,612 | 0,79  | 4,45E-07 | 3 | Gapdh         |
| 3,87E-11 | -0,50974 | 0,186 | 0,431 | 4,79E-07 | 3 | Dcaf12        |
| 4,49E-11 | -0,43506 | 0,074 | 0,294 | 5,56E-07 | 3 | Smagp         |
| 4,61E-11 | -0,51338 | 0,543 | 0,733 | 5,71E-07 | 3 | Ube2d2a       |
| 4,64E-11 | 0,388977 | 0,516 | 0,288 | 5,75E-07 | 3 | Malt1         |
| 4,76E-11 | -0,47598 | 0,128 | 0,361 | 5,89E-07 | 3 | Fas           |
| 4,82E-11 | 0,38315  | 0,293 | 0,123 | 5,96E-07 | 3 | Rnf13         |
| 5,15E-11 | -0,63079 | 0,053 | 0,264 | 6,38E-07 | 3 | Mcm5          |
| 5,36E-11 | 0,263003 | 0,995 | 1     | 6,63E-07 | 3 | Rps24         |
| 5,84E-11 | -0,71383 | 0,234 | 0,456 | 7,23E-07 | 3 | 8430410A17Rik |

|          |          |       |       |          |   |          |
|----------|----------|-------|-------|----------|---|----------|
| 1,13E-10 | -0,48341 | 0,713 | 0,825 | 1,39E-06 | 3 | Hnrnpa3  |
| 1,2E-10  | 0,371703 | 0,261 | 0,103 | 1,48E-06 | 3 | Gbp7     |
| 1,39E-10 | -0,54552 | 0,335 | 0,561 | 1,72E-06 | 3 | Apobec1  |
| 1,48E-10 | 0,309503 | 0,255 | 0,1   | 1,83E-06 | 3 | Gm11648  |
| 1,67E-10 | 0,49573  | 0,644 | 0,444 | 2,07E-06 | 3 | Plid4    |
| 1,97E-10 | -0,63499 | 0,91  | 0,948 | 2,44E-06 | 3 | Ptma     |
| 2,02E-10 | -0,52847 | 0,335 | 0,563 | 2,5E-06  | 3 | Ppp4r2   |
| 2,02E-10 | -0,45673 | 0,064 | 0,274 | 2,5E-06  | 3 | Ogfrl1   |
| 2,04E-10 | 0,50726  | 0,574 | 0,364 | 2,53E-06 | 3 | Cbfa2t3  |
| 2,07E-10 | 0,254381 | 0,287 | 0,12  | 2,56E-06 | 3 | Ccr7     |
| 2,11E-10 | -0,39573 | 0,963 | 0,985 | 2,62E-06 | 3 | Arpc2    |
| 2,23E-10 | -0,44891 | 0,676 | 0,854 | 2,76E-06 | 3 | Irf8     |
| 2,36E-10 | -0,43297 | 0,069 | 0,28  | 2,93E-06 | 3 | Emid1    |
| 2,52E-10 | -0,62781 | 0,468 | 0,647 | 3,12E-06 | 3 | Ran      |
| 2,64E-10 | -0,49935 | 0,239 | 0,455 | 3,27E-06 | 3 | Glrx3    |
| 2,65E-10 | -0,41231 | 0,059 | 0,263 | 3,29E-06 | 3 | Ccnd3    |
| 2,74E-10 | -0,44103 | 0,335 | 0,578 | 3,39E-06 | 3 | St6gal1  |
| 3,46E-10 | -0,4964  | 0,314 | 0,551 | 4,28E-06 | 3 | Marcksl1 |
| 4,17E-10 | -0,64178 | 0,505 | 0,659 | 5,16E-06 | 3 | Top1     |
| 4,59E-10 | -0,42723 | 0,915 | 0,962 | 5,69E-06 | 3 | Pfn1     |
| 4,8E-10  | -0,38245 | 0,027 | 0,216 | 5,94E-06 | 3 | Mybl1    |
| 5,13E-10 | 0,332463 | 0,452 | 0,247 | 6,35E-06 | 3 | Rassf4   |
| 5,6E-10  | 0,432104 | 0,91  | 0,854 | 6,94E-06 | 3 | Mcl1     |
| 6,09E-10 | 0,279008 | 0,186 | 0,063 | 7,54E-06 | 3 | Dopey2   |
| 6,48E-10 | -0,45035 | 0,149 | 0,366 | 8,03E-06 | 3 | Dap      |
| 7,06E-10 | 0,35988  | 0,34  | 0,163 | 8,74E-06 | 3 | Il10rb   |
| 8,06E-10 | -0,53911 | 0,41  | 0,616 | 9,98E-06 | 3 | Bach2    |
| 8,13E-10 | 0,366889 | 0,378 | 0,193 | 1,01E-05 | 3 | Tle3     |
| 8,68E-10 | -0,32382 | 0,064 | 0,272 | 1,07E-05 | 3 | Plxnb2   |
| 9,64E-10 | 0,465277 | 0,266 | 0,112 | 1,19E-05 | 3 | Ccnd2    |
| 9,74E-10 | -0,43793 | 0,277 | 0,508 | 1,21E-05 | 3 | Parp1    |
| 9,82E-10 | -0,37428 | 0,09  | 0,303 | 1,22E-05 | 3 | Mtmr14   |
| 1,05E-09 | -0,47638 | 0,207 | 0,424 | 1,3E-05  | 3 | Helq     |
| 1,05E-09 | 0,254822 | 0,223 | 0,086 | 1,3E-05  | 3 | Gucd1    |
| 1,13E-09 | -0,47548 | 0,654 | 0,805 | 1,4E-05  | 3 | Trp53i11 |
| 1,36E-09 | 0,39442  | 0,819 | 0,666 | 1,69E-05 | 3 | Scd1     |
| 1,53E-09 | -0,51744 | 0,473 | 0,643 | 1,89E-05 | 3 | Ldha     |
| 1,65E-09 | -0,4086  | 0,106 | 0,315 | 2,04E-05 | 3 | Bzw2     |
| 1,86E-09 | 0,321692 | 0,298 | 0,134 | 2,31E-05 | 3 | Ckap4    |
| 1,9E-09  | 0,434404 | 0,654 | 0,436 | 2,35E-05 | 3 | Evi2b    |
| 2,04E-09 | 0,308743 | 0,367 | 0,185 | 2,52E-05 | 3 | Glt25d1  |
| 2,11E-09 | 0,298382 | 0,213 | 0,082 | 2,62E-05 | 3 | Stoml1   |
| 2,12E-09 | -0,28606 | 1     | 1     | 2,62E-05 | 3 | Actb     |
| 2,29E-09 | 0,398759 | 0,42  | 0,238 | 2,83E-05 | 3 | Nfat5    |
| 2,67E-09 | -0,43071 | 0,899 | 0,949 | 3,3E-05  | 3 | Nap1l1   |
| 2,82E-09 | -0,39362 | 0,064 | 0,259 | 3,49E-05 | 3 | Mcm2     |
| 3,37E-09 | 0,550569 | 0,553 | 0,371 | 4,17E-05 | 3 | Ctsc     |
| 3,41E-09 | 0,384429 | 0,479 | 0,286 | 4,23E-05 | 3 | Tmod3    |
| 4,13E-09 | -0,47966 | 0,622 | 0,807 | 5,11E-05 | 3 | Ccdc50   |
| 4,26E-09 | -0,36821 | 0,91  | 0,962 | 5,27E-05 | 3 | Myl6     |

|          |          |       |       |          |   |               |
|----------|----------|-------|-------|----------|---|---------------|
| 5,12E-09 | -0,43306 | 0,681 | 0,804 | 6,33E-05 | 3 | Atp5a1        |
| 5,7E-09  | 0,343345 | 0,372 | 0,192 | 7,06E-05 | 3 | Tcp11l2       |
| 6,51E-09 | -0,39443 | 0,84  | 0,928 | 8,05E-05 | 3 | Rbm3          |
| 7,48E-09 | -0,50734 | 0,319 | 0,517 | 9,26E-05 | 3 | Pgk1          |
| 8,16E-09 | -0,47314 | 0,34  | 0,527 | 0,000101 | 3 | Erh           |
| 8,19E-09 | -0,4341  | 0,149 | 0,349 | 0,000101 | 3 | Lpin2         |
| 8,34E-09 | -0,51211 | 0,729 | 0,804 | 0,000103 | 3 | Hmgb1         |
| 8,5E-09  | -0,38678 | 0,186 | 0,404 | 0,000105 | 3 | Scimp         |
| 9,04E-09 | 0,344846 | 0,362 | 0,19  | 0,000112 | 3 | Herc1         |
| 9,59E-09 | 0,416584 | 0,532 | 0,348 | 0,000119 | 3 | Cytip         |
| 1,06E-08 | -0,48833 | 0,559 | 0,707 | 0,000131 | 3 | Rhoh          |
| 1,13E-08 | 0,391825 | 0,511 | 0,317 | 0,00014  | 3 | Scd2          |
| 1,16E-08 | -0,44271 | 0,383 | 0,581 | 0,000143 | 3 | Psmb7         |
| 1,25E-08 | 0,427808 | 0,702 | 0,553 | 0,000155 | 3 | Napsa         |
| 1,59E-08 | -0,41009 | 0,761 | 0,854 | 0,000197 | 3 | Limd2         |
| 1,7E-08  | 0,330248 | 0,495 | 0,293 | 0,00021  | 3 | Lrrc33        |
| 1,94E-08 | 0,267079 | 0,165 | 0,057 | 0,00024  | 3 | Relt          |
| 1,94E-08 | -0,32692 | 0,968 | 0,994 | 0,00024  | 3 | H3f3a         |
| 1,97E-08 | -0,36583 | 0,936 | 0,969 | 0,000244 | 3 | Calm1         |
| 2,12E-08 | -0,43416 | 0,707 | 0,791 | 0,000263 | 3 | Clic1         |
| 2,35E-08 | -0,37732 | 0,91  | 0,962 | 0,000291 | 3 | Cd22          |
| 2,5E-08  | -0,39137 | 0,41  | 0,61  | 0,00031  | 3 | Usp7          |
| 2,71E-08 | 0,374393 | 0,606 | 0,421 | 0,000335 | 3 | Ogt           |
| 2,89E-08 | 0,433344 | 0,543 | 0,37  | 0,000357 | 3 | Vmn1r65       |
| 2,99E-08 | -0,52441 | 0,606 | 0,728 | 0,000371 | 3 | Hnrnpab       |
| 3,02E-08 | 0,416246 | 0,777 | 0,575 | 0,000374 | 3 | Zbtb20        |
| 3,03E-08 | -0,42779 | 0,223 | 0,423 | 0,000376 | 3 | Odc1          |
| 3,13E-08 | -0,46856 | 0,628 | 0,762 | 0,000387 | 3 | Bptf          |
| 3,14E-08 | -0,30209 | 0,053 | 0,227 | 0,000389 | 3 | Osbp13        |
| 3,42E-08 | -0,42234 | 0,319 | 0,515 | 0,000424 | 3 | Ssbp3         |
| 3,47E-08 | -0,43814 | 0,452 | 0,612 | 0,00043  | 3 | Lrmp          |
| 3,62E-08 | -0,43905 | 0,239 | 0,443 | 0,000448 | 3 | Mbd4          |
| 3,75E-08 | 0,476263 | 0,654 | 0,503 | 0,000464 | 3 | Pyhin1        |
| 4,04E-08 | -0,38125 | 0,117 | 0,305 | 0,0005   | 3 | Xrcc1         |
| 4,05E-08 | -0,42357 | 0,862 | 0,919 | 0,000501 | 3 | Ppia          |
| 4,07E-08 | -0,3982  | 0,144 | 0,336 | 0,000504 | 3 | Naa40         |
| 4,18E-08 | 0,374876 | 0,92  | 0,801 | 0,000517 | 3 | Btg1          |
| 4,33E-08 | -0,30167 | 0,027 | 0,184 | 0,000536 | 3 | Cpne5         |
| 4,61E-08 | 0,387385 | 0,819 | 0,715 | 0,000571 | 3 | Iqgap1        |
| 4,71E-08 | 0,394787 | 0,654 | 0,463 | 0,000584 | 3 | Hsp90b1       |
| 4,96E-08 | 0,299846 | 0,197 | 0,078 | 0,000614 | 3 | Rb1           |
| 5,05E-08 | 0,299114 | 0,213 | 0,09  | 0,000625 | 3 | Ms4a6c        |
| 5,11E-08 | -0,28375 | 0,037 | 0,197 | 0,000632 | 3 | Neil1         |
| 5,34E-08 | -0,43545 | 0,707 | 0,776 | 0,000662 | 3 | Atp5b         |
| 5,42E-08 | 0,41235  | 0,745 | 0,639 | 0,000672 | 3 | Tcf4          |
| 6,14E-08 | 0,266175 | 1     | 1     | 0,000761 | 3 | Cd79a         |
| 6,17E-08 | -0,3574  | 0,106 | 0,287 | 0,000763 | 3 | Havcr1        |
| 7,13E-08 | -0,39379 | 0,426 | 0,61  | 0,000883 | 3 | Eml4          |
| 7,26E-08 | -0,46335 | 0,324 | 0,52  | 0,000899 | 3 | Pitpnc1       |
| 8,13E-08 | 1,005726 | 0,628 | 0,445 | 0,001007 | 3 | A130077B15Rik |

|          |          |       |       |          |   |               |
|----------|----------|-------|-------|----------|---|---------------|
| 8,38E-08 | -0,63557 | 0,415 | 0,573 | 0,001038 | 3 | Dusp2         |
| 8,43E-08 | -0,39436 | 0,165 | 0,362 | 0,001044 | 3 | Ell3          |
| 8,47E-08 | -0,34307 | 0,207 | 0,409 | 0,001048 | 3 | Pnp           |
| 8,82E-08 | -0,32077 | 0,043 | 0,2   | 0,001093 | 3 | Cobl          |
| 9,23E-08 | 0,443254 | 0,426 | 0,266 | 0,001142 | 3 | Ctsb          |
| 9,97E-08 | 1,423671 | 0,787 | 0,638 | 0,001234 | 3 | Vmn2r55       |
| 1,03E-07 | -0,33529 | 0,059 | 0,222 | 0,001273 | 3 | H2afx         |
| 1,03E-07 | -0,4371  | 0,303 | 0,499 | 0,001278 | 3 | Cd86          |
| 1,23E-07 | -0,36553 | 0,309 | 0,509 | 0,001517 | 3 | Arpc3         |
| 1,33E-07 | -0,35353 | 0,037 | 0,188 | 0,001647 | 3 | H1fx          |
| 1,39E-07 | -0,34341 | 0,766 | 0,864 | 0,001719 | 3 | Arpc4         |
| 1,43E-07 | 0,291122 | 0,324 | 0,173 | 0,001774 | 3 | Cyfip1        |
| 1,44E-07 | 0,341169 | 0,846 | 0,725 | 0,001786 | 3 | Siglecg       |
| 1,45E-07 | 0,401768 | 0,569 | 0,386 | 0,001796 | 3 | Itpr2         |
| 1,46E-07 | -0,33463 | 0,941 | 0,976 | 0,001807 | 3 | Hspa8         |
| 1,51E-07 | 1,450581 | 0,91  | 0,789 | 0,001864 | 3 | Grk4          |
| 1,63E-07 | 0,335108 | 0,25  | 0,119 | 0,002015 | 3 | Prkce         |
| 1,71E-07 | 0,314362 | 0,319 | 0,171 | 0,002118 | 3 | Abcg1         |
| 1,76E-07 | -0,39529 | 0,415 | 0,592 | 0,002185 | 3 | Cyfip2        |
| 1,87E-07 | -0,37859 | 0,266 | 0,464 | 0,00232  | 3 | Akt1          |
| 1,99E-07 | -0,25001 | 0,027 | 0,172 | 0,002467 | 3 | Ada           |
| 2,02E-07 | -0,33233 | 0,814 | 0,868 | 0,002505 | 3 | Tnfrsf13c     |
| 2,05E-07 | -0,36546 | 0,404 | 0,604 | 0,002534 | 3 | Hdac7         |
| 2,09E-07 | 0,427623 | 0,553 | 0,378 | 0,002583 | 3 | Trim34a       |
| 2,18E-07 | 0,273305 | 0,346 | 0,184 | 0,002693 | 3 | Scml4         |
| 2,42E-07 | -0,38141 | 0,191 | 0,37  | 0,00299  | 3 | Atad1         |
| 2,48E-07 | 0,379614 | 0,883 | 0,784 | 0,003076 | 3 | Mycbp2        |
| 2,49E-07 | -0,35228 | 0,207 | 0,392 | 0,003086 | 3 | Dbi           |
| 2,49E-07 | -0,42859 | 0,383 | 0,548 | 0,003087 | 3 | Lpxn          |
| 2,51E-07 | -0,63145 | 0,245 | 0,41  | 0,003103 | 3 | Mcm6          |
| 2,66E-07 | 0,290953 | 0,298 | 0,156 | 0,003297 | 3 | H2-K2         |
| 2,68E-07 | 0,323663 | 0,59  | 0,389 | 0,003321 | 3 | Anxa6         |
| 2,81E-07 | -0,79181 | 0,17  | 0,33  | 0,003474 | 3 | Mki67         |
| 2,86E-07 | -0,38894 | 0,415 | 0,578 | 0,003539 | 3 | Tra2b         |
| 2,92E-07 | 0,527516 | 0,255 | 0,121 | 0,003613 | 3 | F830016B08Rik |
| 2,95E-07 | -0,41688 | 0,622 | 0,738 | 0,003651 | 3 | Atp5g3        |
| 3,12E-07 | -0,34045 | 0,096 | 0,262 | 0,003858 | 3 | Aars          |
| 3,19E-07 | -0,32212 | 0,186 | 0,378 | 0,003954 | 3 | Rfc2          |
| 3,21E-07 | -0,35046 | 0,122 | 0,298 | 0,003969 | 3 | Lipc          |
| 3,35E-07 | -0,43194 | 0,356 | 0,518 | 0,004144 | 3 | Syngn2        |
| 3,35E-07 | -0,75407 | 0,564 | 0,693 | 0,004149 | 3 | H2afz         |
| 3,46E-07 | 1,258223 | 1     | 0,991 | 0,004282 | 3 | Kcnq1ot1      |
| 3,73E-07 | -0,3808  | 0,5   | 0,656 | 0,00462  | 3 | Ywhaq         |
| 3,77E-07 | -0,2962  | 0,037 | 0,182 | 0,004667 | 3 | Lcp2          |
| 4E-07    | -0,34563 | 0,399 | 0,586 | 0,004958 | 3 | Lat2          |
| 4,5E-07  | -0,43057 | 0,223 | 0,397 | 0,005571 | 3 | Slbp          |
| 4,56E-07 | 0,391182 | 0,431 | 0,274 | 0,005649 | 3 | Cd84          |
| 4,73E-07 | -0,36574 | 0,223 | 0,401 | 0,005855 | 3 | Il21r         |
| 4,74E-07 | -0,40843 | 0,096 | 0,253 | 0,005871 | 3 | Mcm3          |
| 5,25E-07 | -0,29702 | 0,059 | 0,213 | 0,006505 | 3 | Prim1         |

|          |          |       |       |          |   |           |
|----------|----------|-------|-------|----------|---|-----------|
| 5,65E-07 | -0,35391 | 0,697 | 0,791 | 0,006993 | 3 | Atp5g2    |
| 5,89E-07 | 0,288122 | 0,314 | 0,169 | 0,007297 | 3 | Tuba4a    |
| 5,97E-07 | -0,29292 | 0,074 | 0,232 | 0,00739  | 3 | Enpp1     |
| 6,15E-07 | -0,33426 | 0,287 | 0,462 | 0,00761  | 3 | Azin1     |
| 6,42E-07 | -0,36059 | 0,202 | 0,388 | 0,007951 | 3 | Asap1     |
| 6,55E-07 | 0,275137 | 0,484 | 0,307 | 0,008109 | 3 | Rasgrp2   |
| 6,69E-07 | -0,30089 | 0,144 | 0,315 | 0,008278 | 3 | Akap2     |
| 6,84E-07 | 0,291531 | 0,75  | 0,585 | 0,008467 | 3 | Ddx3x     |
| 7E-07    | -0,27863 | 0,096 | 0,263 | 0,008671 | 3 | Sav1      |
| 7,08E-07 | 0,323637 | 0,314 | 0,172 | 0,008765 | 3 | Morc3     |
| 7,11E-07 | -0,2681  | 0,08  | 0,238 | 0,008801 | 3 | Ralgds    |
| 7,47E-07 | -0,35079 | 0,793 | 0,9   | 0,009244 | 3 | Mef2c     |
| 7,59E-07 | -0,36037 | 0,101 | 0,259 | 0,009401 | 3 | Dut       |
| 7,81E-07 | 0,273825 | 0,309 | 0,169 | 0,009669 | 3 | Slfn2     |
| 8,47E-07 | -0,33933 | 0,096 | 0,254 | 0,010492 | 3 | Sh2b2     |
| 8,69E-07 | -0,35183 | 0,957 | 0,986 | 0,010757 | 3 | Ucp2      |
| 9,47E-07 | -0,36998 | 0,138 | 0,306 | 0,011729 | 3 | Rnf157    |
| 9,6E-07  | 0,295304 | 0,372 | 0,218 | 0,011887 | 3 | Acp5      |
| 9,78E-07 | 0,289925 | 0,388 | 0,233 | 0,012112 | 3 | Itpr1     |
| 1,03E-06 | -0,45464 | 0,085 | 0,234 | 0,012754 | 3 | Cks2      |
| 1,06E-06 | -0,28625 | 0,957 | 0,984 | 0,013178 | 3 | Hnrnpa2b1 |
| 1,09E-06 | -0,4369  | 0,202 | 0,373 | 0,013475 | 3 | Pafah1b3  |
| 1,09E-06 | -0,39403 | 0,787 | 0,863 | 0,013506 | 3 | Eif5a     |
| 1,09E-06 | -0,36521 | 0,282 | 0,451 | 0,013534 | 3 | Pomp      |
| 1,11E-06 | -0,30352 | 0,261 | 0,437 | 0,013733 | 3 | Psmb3     |
| 1,12E-06 | -0,28508 | 0,122 | 0,292 | 0,013824 | 3 | Epb4.1    |
| 1,13E-06 | -0,36514 | 0,271 | 0,455 | 0,013953 | 3 | Cdk2ap2   |
| 1,18E-06 | 1,033893 | 0,686 | 0,543 | 0,014577 | 3 | Gm10785   |
| 1,19E-06 | -0,34828 | 0,186 | 0,359 | 0,014767 | 3 | Bcl7a     |
| 1,21E-06 | 0,279985 | 0,277 | 0,142 | 0,014993 | 3 | Kbtbd11   |
| 1,22E-06 | -0,35566 | 0,064 | 0,207 | 0,015057 | 3 | Cdca7     |
| 1,25E-06 | -0,27023 | 0,064 | 0,208 | 0,015528 | 3 | Rtca      |
| 1,26E-06 | 0,414827 | 0,5   | 0,341 | 0,01559  | 3 | Abhd17b   |
| 1,3E-06  | 0,590978 | 0,904 | 0,847 | 0,016133 | 3 | ApoE      |
| 1,36E-06 | -0,29071 | 0,037 | 0,173 | 0,016787 | 3 | Uhrf1     |
| 1,38E-06 | -0,29464 | 0,862 | 0,901 | 0,017075 | 3 | Grb2      |
| 1,38E-06 | 0,269142 | 0,25  | 0,126 | 0,017092 | 3 | Gpr174    |
| 1,4E-06  | 0,34167  | 0,548 | 0,381 | 0,017335 | 3 | Rasa3     |
| 1,48E-06 | 0,404818 | 0,793 | 0,647 | 0,018326 | 3 | Syk       |
| 1,55E-06 | -0,35185 | 0,191 | 0,359 | 0,019162 | 3 | Sema7a    |
| 1,56E-06 | -0,34108 | 0,681 | 0,796 | 0,01934  | 3 | Pkm       |
| 1,75E-06 | 0,286054 | 0,431 | 0,264 | 0,021608 | 3 | Chd2      |
| 1,77E-06 | 0,341591 | 0,394 | 0,244 | 0,021968 | 3 | Emp3      |
| 1,78E-06 | -0,38892 | 0,112 | 0,27  | 0,022085 | 3 | Asf1b     |
| 1,81E-06 | -0,33521 | 0,42  | 0,586 | 0,022351 | 3 | Hnrnpd    |
| 1,84E-06 | -0,30481 | 0,122 | 0,284 | 0,022831 | 3 | Slamf1    |
| 1,85E-06 | -0,26769 | 0,059 | 0,199 | 0,022872 | 3 | Vopp1     |
| 1,88E-06 | 0,255126 | 1     | 0,998 | 0,023307 | 3 | Cd19      |
| 1,89E-06 | -0,40329 | 0,202 | 0,365 | 0,023389 | 3 | Ehd3      |
| 1,95E-06 | -0,27407 | 1     | 0,997 | 0,024194 | 3 | Actg1     |



|          |          |       |       |          |   |               |
|----------|----------|-------|-------|----------|---|---------------|
| 1,96E-06 | -0,34214 | 0,383 | 0,555 | 0,024236 | 3 | Psma7         |
| 2,07E-06 | 0,345971 | 0,628 | 0,474 | 0,02562  | 3 | Sh3bp5        |
| 2,09E-06 | 0,259373 | 0,245 | 0,125 | 0,025826 | 3 | Chd3          |
| 2,18E-06 | -0,25692 | 0,037 | 0,169 | 0,026948 | 3 | Smco4         |
| 2,27E-06 | -0,3245  | 0,16  | 0,329 | 0,028154 | 3 | Cdc25b        |
| 2,36E-06 | -0,7546  | 0,489 | 0,626 | 0,029203 | 3 | Pcna          |
| 2,46E-06 | 0,25795  | 0,41  | 0,249 | 0,030451 | 3 | Itgb7         |
| 2,47E-06 | 0,295879 | 0,649 | 0,487 | 0,030555 | 3 | Gimap8        |
| 2,53E-06 | 0,33345  | 0,473 | 0,32  | 0,031338 | 3 | Adcy7         |
| 2,54E-06 | -0,32878 | 0,202 | 0,379 | 0,031436 | 3 | Ube2h         |
| 2,67E-06 | 0,287294 | 0,489 | 0,322 | 0,033021 | 3 | Cdc42se2      |
| 2,69E-06 | -0,35102 | 0,33  | 0,495 | 0,033277 | 3 | Rbbp4         |
| 2,7E-06  | 0,287202 | 0,553 | 0,371 | 0,033408 | 3 | Stk10         |
| 2,8E-06  | -0,31959 | 0,638 | 0,782 | 0,034618 | 3 | Rasgrp3       |
| 2,83E-06 | 0,341492 | 0,66  | 0,518 | 0,034996 | 3 | Wdfy4         |
| 2,85E-06 | -0,27863 | 0,09  | 0,241 | 0,035221 | 3 | Ildr1         |
| 2,99E-06 | -0,30034 | 0,181 | 0,358 | 0,036962 | 3 | Brwd1         |
| 3,07E-06 | 0,395657 | 0,617 | 0,458 | 0,038033 | 3 | Slc12a6       |
| 3,29E-06 | 0,255363 | 0,995 | 0,994 | 0,040742 | 3 | Rps18         |
| 3,42E-06 | -0,34738 | 0,032 | 0,156 | 0,04233  | 3 | Cenpe         |
| 3,47E-06 | -0,36464 | 0,34  | 0,508 | 0,042947 | 3 | Herpud1       |
| 3,49E-06 | -0,26668 | 0,037 | 0,164 | 0,04318  | 3 | Hells         |
| 3,57E-06 | -0,37137 | 0,463 | 0,62  | 0,044251 | 3 | Gna13         |
| 3,81E-06 | -0,31006 | 0,096 | 0,241 | 0,047215 | 3 | Gadd45b       |
| 3,88E-06 | -0,3414  | 0,186 | 0,349 | 0,048015 | 3 | Rapegf4       |
| 3,89E-06 | 0,342225 | 0,441 | 0,281 | 0,048173 | 3 | Sgpl1         |
| 3,9E-06  | 0,322749 | 0,739 | 0,605 | 0,048305 | 3 | Tbc1d10c      |
| 3,96E-06 | -0,37226 | 0,702 | 0,785 | 0,049082 | 3 | Srsf2         |
| 3,98E-06 | -0,33438 | 0,186 | 0,345 | 0,049293 | 3 | Stap1         |
| 4,03E-06 | -0,39662 | 0,191 | 0,346 | 0,049867 | 3 | Mcm7          |
| 4,05E-06 | -0,36454 | 0,096 | 0,24  | 0,050164 | 3 | Slpi          |
| 4,16E-06 | -0,34387 | 0,064 | 0,202 | 0,051466 | 3 | Dhfr          |
| 4,17E-06 | -0,36075 | 0,207 | 0,373 | 0,051668 | 3 | Atp8a1        |
| 4,29E-06 | -0,28351 | 0,069 | 0,206 | 0,053136 | 3 | Endou         |
| 4,36E-06 | -0,32473 | 0,335 | 0,5   | 0,053988 | 3 | Hspa4         |
| 4,6E-06  | -0,49949 | 0,356 | 0,49  | 0,056913 | 3 | Hpse          |
| 4,73E-06 | -0,33121 | 0,239 | 0,392 | 0,058572 | 3 | Sdhb          |
| 4,74E-06 | -0,63182 | 0,101 | 0,241 | 0,058741 | 3 | 2810417H13Rik |
| 4,87E-06 | -0,35512 | 0,229 | 0,392 | 0,060333 | 3 | 2700029M09Rik |
| 4,92E-06 | 0,323931 | 0,271 | 0,149 | 0,060954 | 3 | Rbms1         |
| 4,94E-06 | -0,28243 | 0,112 | 0,26  | 0,061113 | 3 | Mprip         |
| 5,13E-06 | 0,277308 | 1     | 0,988 | 0,063559 | 3 | Serinc3       |
| 5,14E-06 | 0,262517 | 0,505 | 0,339 | 0,063608 | 3 | Myl12b        |
| 5,24E-06 | -0,2506  | 0,101 | 0,256 | 0,064821 | 3 | Fut8          |
| 5,99E-06 | -0,26907 | 0,08  | 0,222 | 0,07413  | 3 | Pdk3          |
| 6,11E-06 | -0,36913 | 0,367 | 0,519 | 0,075637 | 3 | Rbbp7         |
| 6,11E-06 | -0,47505 | 0,324 | 0,464 | 0,075698 | 3 | Syne1         |
| 6,38E-06 | -0,36262 | 0,303 | 0,467 | 0,079042 | 3 | Psip1         |
| 6,39E-06 | -0,2663  | 0,085 | 0,229 | 0,079123 | 3 | 4833439L19Rik |
| 7,44E-06 | 0,283858 | 0,367 | 0,231 | 0,092168 | 3 | Mgat4a        |

|          |          |       |       |          |   |               |
|----------|----------|-------|-------|----------|---|---------------|
| 7,51E-06 | -0,33683 | 0,207 | 0,366 | 0,092943 | 3 | Ublcp1        |
| 7,63E-06 | -0,29926 | 0,601 | 0,744 | 0,094422 | 3 | Ptk2b         |
| 7,7E-06  | 0,291689 | 0,676 | 0,53  | 0,095345 | 3 | Akna          |
| 7,71E-06 | -0,2796  | 0,149 | 0,303 | 0,095501 | 3 | Sh3pxd2a      |
| 7,85E-06 | 0,393087 | 0,622 | 0,497 | 0,09723  | 3 | Cd47          |
| 7,96E-06 | -0,34122 | 0,181 | 0,334 | 0,098596 | 3 | Dnmt1         |
| 8,05E-06 | 0,369394 | 0,628 | 0,506 | 0,099688 | 3 | Tmem123       |
| 8,24E-06 | -0,34801 | 0,574 | 0,673 | 0,102027 | 3 | Prdx1         |
| 8,38E-06 | -0,31596 | 0,106 | 0,247 | 0,103706 | 3 | Gsn           |
| 8,8E-06  | 0,390042 | 0,585 | 0,451 | 0,108954 | 3 | Tlr1          |
| 9,12E-06 | -0,29218 | 0,074 | 0,204 | 0,112936 | 3 | Btnl2         |
| 9,49E-06 | -0,31102 | 0,165 | 0,319 | 0,11747  | 3 | Dstn          |
| 9,54E-06 | -0,27058 | 0,234 | 0,397 | 0,118048 | 3 | Snrpf         |
| 9,73E-06 | 0,330295 | 0,596 | 0,441 | 0,120477 | 3 | Filip1l       |
| 1,02E-05 | 0,348976 | 0,883 | 0,792 | 0,125808 | 3 | Ly86          |
| 1,03E-05 | -0,28736 | 0,106 | 0,253 | 0,127357 | 3 | Slamf7        |
| 1,08E-05 | -0,34843 | 0,112 | 0,249 | 0,133861 | 3 | Mcm4          |
| 1,09E-05 | 0,355485 | 0,383 | 0,24  | 0,134479 | 3 | Gm8369        |
| 1,15E-05 | -0,2722  | 0,255 | 0,418 | 0,142266 | 3 | Aff4          |
| 1,23E-05 | -0,39648 | 0,399 | 0,558 | 0,152397 | 3 | Fchsd2        |
| 1,23E-05 | -0,32165 | 0,452 | 0,614 | 0,152636 | 3 | Hnrnpa0       |
| 1,26E-05 | 0,322705 | 0,319 | 0,191 | 0,156603 | 3 | Rbpj          |
| 1,32E-05 | 0,273001 | 0,202 | 0,101 | 0,162934 | 3 | 5830416P10Rik |
| 1,32E-05 | 0,262972 | 0,191 | 0,092 | 0,163671 | 3 | Kat6b         |
| 1,35E-05 | 0,314419 | 0,729 | 0,598 | 0,166558 | 3 | Mll5          |
| 1,35E-05 | -0,30695 | 0,516 | 0,657 | 0,167437 | 3 | Atp5e         |
| 1,36E-05 | 0,329372 | 0,42  | 0,289 | 0,168639 | 3 | Rasgrp1       |
| 1,37E-05 | 0,33593  | 0,239 | 0,128 | 0,16952  | 3 | Nedd4         |
| 1,38E-05 | 0,262318 | 0,287 | 0,167 | 0,170485 | 3 | Gm13157       |
| 1,39E-05 | -0,25554 | 0,08  | 0,209 | 0,172534 | 3 | Amz2          |
| 1,41E-05 | 0,262207 | 0,324 | 0,193 | 0,174503 | 3 | Lmo4          |
| 1,44E-05 | -0,34853 | 0,309 | 0,454 | 0,178004 | 3 | Anp32e        |
| 1,51E-05 | -0,34727 | 0,213 | 0,35  | 0,187544 | 3 | H2afv         |
| 1,52E-05 | -0,29794 | 0,383 | 0,526 | 0,188643 | 3 | Shfm1         |
| 1,56E-05 | -0,28695 | 0,457 | 0,591 | 0,192612 | 3 | Oaz1          |
| 1,6E-05  | -0,28475 | 0,074 | 0,202 | 0,197726 | 3 | Pla2g12a      |
| 1,69E-05 | -0,30862 | 0,553 | 0,689 | 0,208746 | 3 | Purb          |
| 1,74E-05 | 0,271722 | 0,426 | 0,288 | 0,214974 | 3 | Tmem59        |
| 1,82E-05 | -0,26652 | 0,894 | 0,936 | 0,225136 | 3 | H3f3b         |
| 1,86E-05 | -0,29753 | 0,771 | 0,824 | 0,230709 | 3 | Hsp90aa1      |
| 1,86E-05 | -0,31653 | 0,128 | 0,264 | 0,230771 | 3 | Psat1         |
| 1,9E-05  | 0,258409 | 0,84  | 0,738 | 0,234627 | 3 | Hmha1         |
| 1,92E-05 | -0,31613 | 0,181 | 0,328 | 0,237112 | 3 | Whsc1         |
| 1,92E-05 | 0,252819 | 0,372 | 0,233 | 0,23745  | 3 | Iqsec1        |
| 1,92E-05 | 0,286872 | 0,186 | 0,091 | 0,237467 | 3 | Ptpn12        |
| 2,09E-05 | -0,36544 | 0,787 | 0,868 | 0,258866 | 3 | Cnn2          |
| 2,18E-05 | -0,32701 | 0,553 | 0,672 | 0,270004 | 3 | Cox6c         |
| 2,21E-05 | 0,300188 | 0,33  | 0,2   | 0,274129 | 3 | Lgals9        |
| 2,24E-05 | -0,29511 | 0,473 | 0,602 | 0,27677  | 3 | Taf10         |
| 2,29E-05 | -0,28917 | 0,356 | 0,496 | 0,283992 | 3 | Psma2         |

|          |          |       |       |          |     |               |
|----------|----------|-------|-------|----------|-----|---------------|
| 2,32E-05 | 0,379932 | 0,601 | 0,484 | 0,286874 | 3   | Wdr92         |
| 2,34E-05 | 1,027134 | 0,585 | 0,452 | 0,289315 | 3   | Zfp71-rs1     |
| 2,37E-05 | 0,327952 | 0,537 | 0,389 | 0,293759 | 3   | Mylip         |
| 2,41E-05 | 0,540908 | 0,633 | 0,495 | 0,298683 | 3   | Vim           |
| 2,43E-05 | -0,29172 | 0,282 | 0,422 | 0,301069 | 3   | Plekho1       |
| 2,56E-05 | -0,27404 | 0,979 | 0,994 | 0,316603 | 3   | Pabpc1        |
| 2,7E-05  | -0,31081 | 0,25  | 0,405 | 0,334118 | 3   | Rev3l         |
| 2,72E-05 | 0,358199 | 0,372 | 0,243 | 0,336525 | 3   | Wdfy1         |
| 2,72E-05 | 0,252942 | 0,457 | 0,318 | 0,337221 | 3   | Slc28a2       |
| 2,83E-05 | -0,2598  | 0,362 | 0,529 | 0,350138 | 3   | Snrpb         |
| 2,91E-05 | -0,27487 | 0,239 | 0,391 | 0,360839 | 3   | Ube2n         |
| 2,94E-05 | -0,27974 | 0,229 | 0,375 | 0,364433 | 3   | Cwc15         |
| 2,96E-05 | -0,25778 | 0,378 | 0,539 | 0,365924 | 3   | Syvn1         |
| 2,96E-05 | 0,350676 | 0,92  | 0,84  | 0,366172 | 3   | Pou2f2        |
| 3E-05    | 0,312305 | 0,468 | 0,338 | 0,371415 | 3   | Klf13         |
| 3,03E-05 | -0,3456  | 0,564 | 0,674 | 0,374872 | 3   | Ppp1ca        |
| 3,12E-05 | 0,303611 | 0,707 | 0,568 | 0,385687 | 3   | Gimap6        |
| 3,15E-05 | 0,311691 | 0,324 | 0,21  | 0,390346 | 3   | E330020D12Rik |
| 3,19E-05 | 0,319827 | 0,766 | 0,642 | 0,395417 | 3   | Ifi30         |
| 3,19E-05 | -0,26492 | 0,064 | 0,184 | 0,395512 | 3   | Nmral1        |
| 3,28E-05 | -0,30983 | 0,101 | 0,229 | 0,40575  | 3   | Mad2l1        |
| 3,39E-05 | -0,25948 | 0,064 | 0,182 | 0,419247 | 3   | Gatm          |
| 3,55E-05 | -0,33799 | 0,457 | 0,596 | 0,439926 | 3   | Hn1           |
| 3,9E-05  | 0,412333 | 0,638 | 0,541 | 0,483047 | 3   | Myo1e         |
| 4,01E-05 | -0,35846 | 0,468 | 0,596 | 0,496349 | 3   | Tcea1         |
| 4,16E-05 | -0,25667 | 0,096 | 0,223 | 0,514827 | 3   | Sik3          |
| 4,3E-05  | -0,32497 | 0,463 | 0,585 | 0,532197 | 3   | Cox7b         |
| 4,5E-05  | -0,32056 | 0,128 | 0,25  | 0,557468 | 3   | Tk1           |
| 4,74E-05 | -0,33377 | 0,441 | 0,561 | 0,586982 | 3   | Atp5j         |
| 4,74E-05 | -0,31688 | 0,351 | 0,499 | 0,587065 | 3   | Strbp         |
| 5,47E-05 | -0,27431 | 0,654 | 0,765 | 0,677661 | 3   | Btf3          |
| 5,9E-05  | -0,26303 | 0,069 | 0,182 | 0,730067 | 3   | Stxbp1        |
| 5,91E-05 | -0,35416 | 0,186 | 0,321 | 0,731861 | 3   | Rgs2          |
| 6,1E-05  | -0,27905 | 0,282 | 0,432 | 0,755433 | 3   | Rbm38         |
| 6,22E-05 | -0,31449 | 0,09  | 0,209 | 0,770579 | 3   | Lig1          |
| 6,38E-05 | -0,27276 | 0,197 | 0,336 | 0,789332 | 3   | Cpsf2         |
| 6,63E-05 | -0,5183  | 0,16  | 0,285 | 0,82131  | 3   | Top2a         |
| 6,78E-05 | -0,26037 | 0,612 | 0,727 | 0,839092 | 3   | Srsf7         |
| 7,14E-05 | -0,2829  | 0,644 | 0,753 | 0,883334 | 3   | Dynll1        |
| 7,56E-05 | -0,54029 | 0,149 | 0,267 | 0,935415 | 3   | Nrgn          |
| 7,82E-05 | 0,266019 | 0,489 | 0,356 | 0,967607 | 3   | Trim12c       |
| 7,96E-05 | -0,27265 | 0,149 | 0,279 | 0,985108 | 3   | Psmd13        |
| 7,98E-05 | -0,29491 | 0,255 | 0,398 | 0,987551 | 3   | Tpi1          |
| 8,09E-05 | -0,29767 | 0,271 | 0,415 |          | 1 3 | Pxk           |
| 8,52E-05 | -0,29058 | 0,686 | 0,8   |          | 1 3 | Srsf3         |
| 8,53E-05 | -0,28688 | 0,431 | 0,562 |          | 1 3 | Psmb4         |
| 8,67E-05 | -0,25716 | 0,383 | 0,536 |          | 1 3 | Nedd8         |
| 9,06E-05 | -0,37595 | 0,101 | 0,218 |          | 1 3 | Eif5a2        |
| 9,16E-05 | -0,28702 | 0,362 | 0,502 |          | 1 3 | Cbx3          |
| 9,21E-05 | 0,294621 | 0,431 | 0,304 |          | 1 3 | Tank          |

|          |          |       |       |     |         |
|----------|----------|-------|-------|-----|---------|
| 9,32E-05 | -0,31573 | 0,335 | 0,467 | 1 3 | Cct8    |
| 9,36E-05 | -0,25953 | 0,644 | 0,766 | 1 3 | Hvcn1   |
| 9,4E-05  | -0,25521 | 0,367 | 0,493 | 1 3 | Rftn1   |
| 0,000102 | -0,26812 | 0,527 | 0,639 | 1 3 | Atp5l   |
| 0,000105 | 0,26473  | 0,314 | 0,195 | 1 3 | Ccng2   |
| 0,000108 | -0,31292 | 0,319 | 0,446 | 1 3 | Ube2j1  |
| 0,000111 | -0,33416 | 0,484 | 0,592 | 1 3 | Mif4gd  |
| 0,000141 | -0,27115 | 0,452 | 0,573 | 1 3 | Nono    |
| 0,000145 | -0,37809 | 0,479 | 0,573 | 1 3 | Scaf11  |
| 0,00015  | -0,29429 | 0,511 | 0,611 | 1 3 | Hnrnpm  |
| 0,000151 | 0,256416 | 0,862 | 0,809 | 1 3 | Ctss    |
| 0,000152 | -0,26324 | 0,58  | 0,715 | 1 3 | Pten    |
| 0,000166 | -0,26122 | 0,255 | 0,387 | 1 3 | Naa50   |
| 0,000167 | -0,28831 | 0,447 | 0,585 | 1 3 | Atp6v1f |
| 0,000167 | -0,29029 | 0,665 | 0,749 | 1 3 | Ywhae   |
| 0,000167 | -0,27134 | 0,681 | 0,732 | 1 3 | Hnrnpu  |
| 0,00017  | -0,25448 | 0,995 | 0,989 | 1 3 | Cd53    |
| 0,00017  | -0,28861 | 0,229 | 0,361 | 1 3 | Trim35  |
| 0,000178 | -0,26722 | 0,218 | 0,339 | 1 3 | Synrg   |
| 0,000179 | -0,26091 | 0,181 | 0,311 | 1 3 | Txn1    |
| 0,000179 | -0,27558 | 0,665 | 0,753 | 1 3 | Serf2   |
| 0,00019  | 0,288895 | 0,707 | 0,612 | 1 3 | Clk1    |
| 0,000206 | -0,38896 | 0,394 | 0,508 | 1 3 | Mif     |
| 0,000207 | 0,270328 | 0,527 | 0,408 | 1 3 | Stk38   |
| 0,000231 | 0,252098 | 0,42  | 0,305 | 1 3 | Fbxo11  |
| 0,000237 | -0,2579  | 0,165 | 0,285 | 1 3 | Slc30a5 |
| 0,000238 | -0,26543 | 0,266 | 0,391 | 1 3 | Fam105b |
| 0,000247 | -0,31649 | 0,383 | 0,506 | 1 3 | Srpk3   |
| 0,000263 | -0,28041 | 0,245 | 0,368 | 1 3 | Smarca4 |
| 0,000282 | 0,275346 | 0,436 | 0,313 | 1 3 | Cd2     |
| 0,000294 | 0,328755 | 0,431 | 0,321 | 1 3 | Lck     |
| 0,0003   | 0,27825  | 0,463 | 0,35  | 1 3 | Atp6v0b |
| 0,000302 | -0,31178 | 0,41  | 0,53  | 1 3 | Cycs    |
| 0,000314 | -0,30632 | 0,053 | 0,147 | 1 3 | Ccnb2   |
| 0,000315 | 0,250185 | 0,239 | 0,144 | 1 3 | Smpdl3a |
| 0,000322 | 0,252594 | 0,441 | 0,324 | 1 3 | Rabac1  |
| 0,000322 | -0,2828  | 0,362 | 0,481 | 1 3 | Cox5a   |
| 0,000334 | -0,26842 | 0,245 | 0,373 | 1 3 | Tmf1    |
| 0,000344 | -0,27066 | 0,027 | 0,108 | 1 3 | Ccna2   |
| 0,00035  | -0,25341 | 0,415 | 0,56  | 1 3 | Cr2     |
| 0,000362 | -0,25408 | 0,16  | 0,275 | 1 3 | Larp7   |
| 0,000372 | 0,260386 | 0,543 | 0,426 | 1 3 | Gigyf1  |
| 0,000374 | 0,258307 | 0,271 | 0,174 | 1 3 | Card6   |
| 0,000394 | -0,27336 | 0,245 | 0,364 | 1 3 | Polr2g  |
| 0,000395 | -0,26696 | 0,144 | 0,257 | 1 3 | Kpna2   |
| 0,000399 | 0,272567 | 0,34  | 0,242 | 1 3 | Cyth4   |
| 0,000403 | -0,37596 | 0,106 | 0,21  | 1 3 | Rrm2    |
| 0,000412 | 0,288943 | 0,702 | 0,614 | 1 3 | Snx2    |
| 0,000465 | -0,32957 | 0,059 | 0,151 | 1 3 | Egr1    |
| 0,000484 | 0,295136 | 0,729 | 0,629 | 1 3 | Lbh     |

|          |          |       |       |            |               |
|----------|----------|-------|-------|------------|---------------|
| 0,000493 | -0,29601 | 0,495 | 0,599 | 1 3        | Ube2l3        |
| 0,000511 | -0,26791 | 0,34  | 0,465 | 1 3        | Srp14         |
| 0,000532 | 0,276863 | 0,463 | 0,358 | 1 3        | Itgal         |
| 0,000543 | 0,288292 | 0,399 | 0,295 | 1 3        | Trim12a       |
| 0,000591 | -0,29376 | 0,505 | 0,591 | 1 3        | Mdh1          |
| 0,000649 | -0,30806 | 0,266 | 0,377 | 1 3        | Rraga         |
| 0,000671 | 0,26232  | 0,628 | 0,532 | 1 3        | Sec11c        |
| 0,000805 | -0,25847 | 0,468 | 0,591 | 1 3        | Ppp1r16b      |
| 0,000833 | -0,28288 | 0,41  | 0,525 | 1 3        | Lsm14a        |
| 0,000862 | 0,357632 | 0,356 | 0,263 | 1 3        | 1110059E24Rik |
| 0,000865 | 0,253654 | 0,436 | 0,337 | 1 3        | Mtdh          |
| 0,000869 | -0,26894 | 0,122 | 0,224 | 1 3        | Siah2         |
| 0,000941 | -0,27612 | 0,351 | 0,461 | 1 3        | Nhp2l1        |
| 0,000946 | -0,25426 | 0,436 | 0,539 | 1 3        | Ewsr1         |
| 0,000967 | -0,29389 | 0,415 | 0,508 | 1 3        | Hprt          |
| 0,001072 | 0,269841 | 0,606 | 0,51  | 1 3        | Huwe1         |
| 0,001091 | 0,250241 | 0,824 | 0,727 | 1 3        | Stk17b        |
| 0,001099 | -0,28353 | 0,495 | 0,598 | 1 3        | Dnaja1        |
| 0,001175 | 0,283867 | 0,372 | 0,273 | 1 3        | C130026l21Rik |
| 0,001192 | -0,2607  | 0,33  | 0,454 | 1 3        | Cmpk1         |
| 0,001245 | -0,25687 | 0,42  | 0,529 | 1 3        | Hcfc1         |
| 0,001428 | -0,25125 | 0,617 | 0,703 | 1 3        | Cpne8         |
| 0,001455 | -0,25421 | 0,176 | 0,273 | 1 3        | Icam1         |
| 0,001455 | -0,26167 | 0,473 | 0,581 | 1 3        | H2-Eb2        |
| 0,001597 | -0,27263 | 0,564 | 0,653 | 1 3        | Ikzf1         |
| 0,001696 | 0,32429  | 0,324 | 0,229 | 1 3        | Zscan26       |
| 0,001899 | -0,26828 | 0,644 | 0,709 | 1 3        | Tnfaip8       |
| 0,002071 | 0,265085 | 0,351 | 0,255 | 1 3        | Nucb1         |
| 0,002374 | 0,264968 | 0,91  | 0,863 | 1 3        | Cd24a         |
| 0,002392 | -0,25996 | 0,628 | 0,689 | 1 3        | Atp5c1        |
| 0,002553 | 0,298073 | 0,436 | 0,344 | 1 3        | Itgb1         |
| 0,002655 | -0,29105 | 0,42  | 0,501 | 1 3        | Tmpo          |
| 0,002953 | 0,263275 | 0,457 | 0,372 | 1 3        | Btg2          |
| 0,003179 | -0,26656 | 0,282 | 0,377 | 1 3        | Tmem64        |
| 0,003903 | 0,255019 | 0,606 | 0,547 | 1 3        | Ikzf3         |
| 0,004066 | 0,25345  | 0,372 | 0,291 | 1 3        | Vamp2         |
| 0,00455  | 0,261866 | 0,612 | 0,519 | 1 3        | Cxcr5         |
| 0,004762 | -0,29629 | 0,42  | 0,512 | 1 3        | Cd83          |
| 0,004771 | -0,25365 | 0,516 | 0,6   | 1 3        | Zfp207        |
| 0,006692 | 0,250624 | 0,734 | 0,645 | 1 3        | Ezr           |
| 0,008021 | -0,29874 | 0,755 | 0,796 | 1 3        | Tubb5         |
| 2,52E-68 | 1,886342 | 0,786 | 0,169 | 3,12E-64 4 | Irgm1         |
| 6,14E-67 | 1,377802 | 0,631 | 0,09  | 7,6E-63 4  | Gbp7          |
| 1,48E-54 | 1,738545 | 0,903 | 0,325 | 1,83E-50 4 | Gm1966        |
| 1,36E-53 | 0,510086 | 0,272 | 0,015 | 1,68E-49 4 | Serpina3f     |
| 2,4E-51  | 1,90237  | 0,971 | 0,495 | 2,97E-47 4 | Stat1         |
| 3,48E-48 | 0,652151 | 0,252 | 0,015 | 4,3E-44 4  | Ifit3         |
| 6,57E-47 | 1,133149 | 0,553 | 0,101 | 8,14E-43 4 | Igtp          |
| 3,6E-46  | 1,387479 | 0,553 | 0,103 | 4,46E-42 4 | Serpina3g     |
| 1,17E-42 | 1,034648 | 0,485 | 0,08  | 1,45E-38 4 | Irgm2         |

|          |          |       |       |          |   |               |
|----------|----------|-------|-------|----------|---|---------------|
| 1,84E-39 | 0,854115 | 0,32  | 0,036 | 2,28E-35 | 4 | Gbp6          |
| 1,34E-38 | 0,505432 | 0,146 | 0,004 | 1,66E-34 | 4 | ligp1         |
| 2,12E-38 | 1,206865 | 0,631 | 0,16  | 2,62E-34 | 4 | Pydc3         |
| 5,1E-37  | 0,36336  | 0,136 | 0,004 | 6,31E-33 | 4 | I830012O16Rik |
| 1,58E-36 | 0,383734 | 0,243 | 0,02  | 1,96E-32 | 4 | Gm12250       |
| 6,43E-36 | 1,313116 | 0,961 | 0,473 | 7,96E-32 | 4 | Mndal         |
| 4,64E-35 | 1,202867 | 0,699 | 0,222 | 5,75E-31 | 4 | Irf1          |
| 2,07E-34 | 1,360224 | 0,913 | 0,453 | 2,56E-30 | 4 | Ifi203        |
| 6,46E-34 | 1,262413 | 0,427 | 0,079 | 7,99E-30 | 4 | Gbp2          |
| 1,68E-33 | 1,690414 | 0,835 | 0,423 | 2,09E-29 | 4 | Ifi47         |
| 3,19E-33 | 1,541199 | 0,66  | 0,226 | 3,95E-29 | 4 | Gbp4          |
| 1,76E-32 | 1,30051  | 0,971 | 0,717 | 2,18E-28 | 4 | Ly6a          |
| 3,87E-30 | 1,170517 | 0,893 | 0,443 | 4,79E-26 | 4 | Pml           |
| 6,8E-30  | 0,814737 | 1     | 0,995 | 8,42E-26 | 4 | B2m           |
| 5,72E-27 | 0,738547 | 0,437 | 0,098 | 7,08E-23 | 4 | Mpeg1         |
| 7,53E-27 | 0,377783 | 0,175 | 0,014 | 9,33E-23 | 4 | Rtp4          |
| 7,29E-26 | 0,97756  | 0,99  | 0,82  | 9,03E-22 | 4 | Shisa5        |
| 8,77E-26 | 1,086746 | 0,99  | 0,85  | 1,09E-21 | 4 | Samhd1        |
| 4,86E-23 | 0,970333 | 0,932 | 0,506 | 6,02E-19 | 4 | Ly6d          |
| 7,13E-23 | 0,274574 | 0,126 | 0,008 | 8,83E-19 | 4 | Csf1          |
| 7,19E-23 | 0,575042 | 0,165 | 0,016 | 8,91E-19 | 4 | Ifit2         |
| 4,19E-22 | 0,748341 | 0,476 | 0,137 | 5,19E-18 | 4 | Ddx58         |
| 1,08E-21 | 0,737493 | 1     | 0,989 | 1,33E-17 | 4 | H2-D1         |
| 2,71E-21 | -1,7359  | 0,272 | 0,687 | 3,35E-17 | 4 | Igj           |
| 1,22E-20 | 0,785621 | 0,359 | 0,087 | 1,52E-16 | 4 | Cd274         |
| 1,34E-20 | 0,944234 | 0,631 | 0,26  | 1,66E-16 | 4 | Parp14        |
| 5,63E-19 | 0,967133 | 0,796 | 0,398 | 6,97E-15 | 4 | Sell          |
| 6,57E-19 | 0,816551 | 0,961 | 0,784 | 8,13E-15 | 4 | Mycbp2        |
| 1,07E-18 | -1,42997 | 0,398 | 0,721 | 1,32E-14 | 4 | Basp1         |
| 1,27E-18 | 0,771516 | 0,359 | 0,095 | 1,57E-14 | 4 | Zbp1          |
| 1,31E-18 | 0,706685 | 1     | 0,98  | 1,62E-14 | 4 | H2-K1         |
| 8,13E-18 | 0,701762 | 0,476 | 0,164 | 1,01E-13 | 4 | Nlrc5         |
| 1,33E-17 | 0,939448 | 0,893 | 0,562 | 1,65E-13 | 4 | Cmah          |
| 1,8E-17  | 0,604645 | 0,33  | 0,083 | 2,23E-13 | 4 | Irf7          |
| 3,93E-17 | -1,2058  | 0,078 | 0,514 | 4,87E-13 | 4 | Mef2b         |
| 5,34E-17 | 0,90102  | 0,33  | 0,089 | 6,61E-13 | 4 | Slfn5         |
| 5,68E-17 | -0,87846 | 1     | 0,999 | 7,03E-13 | 4 | Cfl1          |
| 1,06E-16 | 0,819056 | 0,913 | 0,664 | 1,31E-12 | 4 | Gimap4        |
| 1,42E-16 | -1,29771 | 0,049 | 0,471 | 1,76E-12 | 4 | Rgs13         |
| 1,45E-16 | 0,653271 | 0,33  | 0,086 | 1,79E-12 | 4 | Ffar2         |
| 7,3E-16  | 0,31995  | 0,184 | 0,03  | 9,04E-12 | 4 | BC094916      |
| 3,74E-15 | 0,654646 | 0,408 | 0,139 | 4,64E-11 | 4 | Slfn8         |
| 4,61E-15 | 0,744039 | 0,816 | 0,513 | 5,71E-11 | 4 | Tap1          |
| 5,28E-15 | 0,394558 | 0,107 | 0,01  | 6,54E-11 | 4 | Ifit1         |
| 7,39E-15 | 0,482919 | 1     | 0,999 | 9,15E-11 | 4 | Ly6e          |
| 5,35E-14 | -1,11909 | 0,485 | 0,752 | 6,63E-10 | 4 | Hmgn2         |
| 7,22E-14 | 0,547891 | 0,456 | 0,166 | 8,94E-10 | 4 | Evi2a         |
| 7,92E-14 | 1,020878 | 0,757 | 0,505 | 9,8E-10  | 4 | Pyhin1        |
| 9,33E-14 | -0,94816 | 0,068 | 0,448 | 1,16E-09 | 4 | S1pr2         |
| 1,87E-13 | 0,621713 | 0,534 | 0,233 | 2,32E-09 | 4 | Cdkn1b        |

|          |          |       |       |          |   |               |
|----------|----------|-------|-------|----------|---|---------------|
| 2,2E-13  | 0,310393 | 0,243 | 0,058 | 2,73E-09 | 4 | St3gal6       |
| 3,47E-13 | 0,445705 | 0,165 | 0,029 | 4,29E-09 | 4 | Oasl2         |
| 4,14E-13 | 0,645684 | 0,757 | 0,389 | 5,13E-09 | 4 | Klf2          |
| 5,35E-13 | -0,75038 | 0,961 | 0,984 | 6,63E-09 | 4 | Ucp2          |
| 5,38E-13 | 0,557732 | 0,32  | 0,1   | 6,66E-09 | 4 | Gm14446       |
| 5,59E-13 | 0,736311 | 0,485 | 0,197 | 6,91E-09 | 4 | Lgals9        |
| 9,81E-13 | 0,620413 | 1     | 0,97  | 1,21E-08 | 4 | Malat1        |
| 1,05E-12 | 0,639832 | 0,553 | 0,26  | 1,3E-08  | 4 | Irf9          |
| 1,09E-12 | 0,551805 | 0,748 | 0,405 | 1,35E-08 | 4 | Sub1          |
| 1,8E-12  | 0,515599 | 0,563 | 0,248 | 2,23E-08 | 4 | Itgb7         |
| 5,82E-12 | -0,95652 | 0,117 | 0,452 | 7,21E-08 | 4 | 8430410A17Rik |
| 8,57E-12 | 0,763527 | 0,534 | 0,254 | 1,06E-07 | 4 | Serpinb1a     |
| 1,44E-11 | 0,26171  | 0,175 | 0,036 | 1,78E-07 | 4 | H2-T24        |
| 2,61E-11 | 0,381053 | 0,272 | 0,082 | 3,23E-07 | 4 | Xaf1          |
| 2,78E-11 | 0,588159 | 0,777 | 0,499 | 3,45E-07 | 4 | Itm2b         |
| 2,93E-11 | 0,503486 | 0,728 | 0,391 | 3,63E-07 | 4 | Capg          |
| 3,01E-11 | -0,76072 | 0,718 | 0,876 | 3,73E-07 | 4 | Cd24a         |
| 3,35E-11 | 0,754828 | 0,748 | 0,544 | 4,15E-07 | 4 | Samd9l        |
| 5,77E-11 | 0,661947 | 0,796 | 0,569 | 7,15E-07 | 4 | Gimap6        |
| 5,95E-11 | 0,414765 | 0,291 | 0,093 | 7,37E-07 | 4 | Gbp9          |
| 6,97E-11 | 0,34199  | 0,214 | 0,055 | 8,63E-07 | 4 | Tlr7          |
| 8,16E-11 | 0,618527 | 0,495 | 0,234 | 1,01E-06 | 4 | Ifi27l2a      |
| 1,13E-10 | 0,62759  | 0,874 | 0,642 | 1,4E-06  | 4 | H2-T23        |
| 1,22E-10 | 0,556639 | 0,641 | 0,355 | 1,51E-06 | 4 | Cyb561a3      |
| 1,37E-10 | 0,467805 | 0,505 | 0,23  | 1,7E-06  | 4 | Notch2        |
| 1,73E-10 | 0,456398 | 0,456 | 0,202 | 2,14E-06 | 4 | Stat2         |
| 2,14E-10 | 0,553265 | 0,689 | 0,376 | 2,65E-06 | 4 | Snn           |
| 2,17E-10 | 0,532683 | 0,612 | 0,318 | 2,69E-06 | 4 | S100a10       |
| 2,32E-10 | 0,68212  | 0,34  | 0,137 | 2,87E-06 | 4 | Wars          |
| 2,75E-10 | 0,295489 | 0,214 | 0,057 | 3,4E-06  | 4 | Bst2          |
| 3,45E-10 | -0,70123 | 0,592 | 0,8   | 4,27E-06 | 4 | Slc25a5       |
| 4,11E-10 | 0,502384 | 0,641 | 0,328 | 5,09E-06 | 4 | Map3k1        |
| 4,38E-10 | 0,61905  | 0,748 | 0,522 | 5,42E-06 | 4 | Gimap3        |
| 5,31E-10 | 0,281793 | 0,136 | 0,026 | 6,58E-06 | 4 | Lgals3bp      |
| 5,86E-10 | 0,556497 | 0,932 | 0,852 | 7,25E-06 | 4 | D4Wsu53e      |
| 6,24E-10 | 0,59758  | 0,67  | 0,394 | 7,73E-06 | 4 | Anxa6         |
| 6,75E-10 | -0,84382 | 0,146 | 0,442 | 8,35E-06 | 4 | Gcsam         |
| 7,3E-10  | 0,712176 | 0,408 | 0,175 | 9,03E-06 | 4 | Ms4a4c        |
| 8,05E-10 | 0,52326  | 0,65  | 0,374 | 9,97E-06 | 4 | Ctsc          |
| 1,33E-09 | 0,280831 | 0,175 | 0,043 | 1,64E-05 | 4 | Fcgrt         |
| 1,38E-09 | 0,390533 | 0,388 | 0,166 | 1,71E-05 | 4 | 6030440G07Rik |
| 1,56E-09 | 0,551689 | 0,718 | 0,442 | 1,93E-05 | 4 | Evi2b         |
| 1,73E-09 | 0,508972 | 0,621 | 0,377 | 2,14E-05 | 4 | 2310034O05Rik |
| 1,81E-09 | -0,563   | 0,068 | 0,361 | 2,23E-05 | 4 | Dap           |
| 2,15E-09 | -0,66721 | 0,631 | 0,804 | 2,66E-05 | 4 | Pou2af1       |
| 2,31E-09 | -0,49429 | 0,087 | 0,39  | 2,86E-05 | 4 | Dbi           |
| 2,44E-09 | 0,747876 | 0,602 | 0,383 | 3,01E-05 | 4 | Trim34a       |
| 2,7E-09  | -0,55672 | 0,01  | 0,277 | 3,34E-05 | 4 | Nuggc         |
| 2,81E-09 | 0,382154 | 0,35  | 0,136 | 3,47E-05 | 4 | Cnn3          |
| 2,87E-09 | -0,72235 | 0,408 | 0,647 | 3,55E-05 | 4 | Hmgn1         |

|          |          |       |       |          |   |         |
|----------|----------|-------|-------|----------|---|---------|
| 3,36E-09 | 0,626161 | 0,398 | 0,175 | 4,16E-05 | 4 | Plac8   |
| 3,42E-09 | -0,77297 | 0,252 | 0,543 | 4,23E-05 | 4 | Mtf2    |
| 3,55E-09 | -0,58822 | 0,408 | 0,708 | 4,4E-05  | 4 | Rhoh    |
| 3,63E-09 | 0,423039 | 0,485 | 0,228 | 4,49E-05 | 4 | Cd55    |
| 3,77E-09 | 0,643862 | 0,583 | 0,31  | 4,67E-05 | 4 | Bcl2    |
| 4,15E-09 | -0,5947  | 0,126 | 0,419 | 5,14E-05 | 4 | Helq    |
| 4,41E-09 | -0,49833 | 0,981 | 0,998 | 5,46E-05 | 4 | Actg1   |
| 5,36E-09 | -0,81816 | 0,32  | 0,592 | 6,64E-05 | 4 | Klhl6   |
| 5,8E-09  | 0,583675 | 0,524 | 0,284 | 7,18E-05 | 4 | Gimap7  |
| 5,99E-09 | -0,62124 | 0,728 | 0,852 | 7,41E-05 | 4 | Sypl    |
| 6,2E-09  | 0,481134 | 0,971 | 0,815 | 7,68E-05 | 4 | Macf1   |
| 6,49E-09 | -0,68547 | 0,272 | 0,542 | 8,03E-05 | 4 | Marcks1 |
| 9,02E-09 | 0,281049 | 0,99  | 0,969 | 0,000112 | 4 | Gm17821 |
| 9,2E-09  | 0,591704 | 0,65  | 0,385 | 0,000114 | 4 | B3gnt5  |
| 9,37E-09 | 0,417271 | 0,485 | 0,235 | 0,000116 | 4 | Itpr1   |
| 9,53E-09 | -0,79724 | 0,204 | 0,458 | 0,000118 | 4 | Bcl6    |
| 9,63E-09 | -0,56934 | 0,165 | 0,449 | 0,000119 | 4 | Glrx3   |
| 1,03E-08 | 0,610209 | 0,874 | 0,811 | 0,000128 | 4 | Ctss    |
| 1,21E-08 | -1,05683 | 0,505 | 0,691 | 0,00015  | 4 | H2afz   |
| 1,25E-08 | 0,445395 | 0,32  | 0,13  | 0,000154 | 4 | Parp9   |
| 1,56E-08 | 0,366456 | 0,35  | 0,144 | 0,000193 | 4 | Kbtbd11 |
| 1,91E-08 | -0,97694 | 0,136 | 0,396 | 0,000236 | 4 | Stmn1   |
| 2,08E-08 | 0,593267 | 0,718 | 0,491 | 0,000258 | 4 | Gimap8  |
| 2,29E-08 | 0,50264  | 0,466 | 0,242 | 0,000283 | 4 | Gm8369  |
| 2,7E-08  | -0,66893 | 0,437 | 0,654 | 0,000335 | 4 | Erp44   |
| 3,05E-08 | -0,57157 | 0,155 | 0,422 | 0,000378 | 4 | Dcaf12  |
| 3,29E-08 | 0,60593  | 0,718 | 0,471 | 0,000407 | 4 | Fam65b  |
| 3,61E-08 | 0,599062 | 0,311 | 0,13  | 0,000446 | 4 | Gbp8    |
| 3,69E-08 | -1,02287 | 0,214 | 0,475 | 0,000457 | 4 | Hmgb2   |
| 3,95E-08 | -0,54168 | 0,058 | 0,311 | 0,000489 | 4 | Rassf6  |
| 4,61E-08 | 0,353915 | 0,417 | 0,191 | 0,00057  | 4 | Ccr6    |
| 5,62E-08 | -0,64077 | 0,379 | 0,643 | 0,000695 | 4 | Ran     |
| 6,01E-08 | 0,468018 | 0,66  | 0,412 | 0,000744 | 4 | Ncf1    |
| 7,36E-08 | 0,250383 | 0,194 | 0,059 | 0,000911 | 4 | Ppa1    |
| 7,43E-08 | -0,54077 | 0,641 | 0,801 | 0,00092  | 4 | Atp5a1  |
| 7,88E-08 | 0,514379 | 0,825 | 0,644 | 0,000976 | 4 | Ifi30   |
| 9,37E-08 | -0,79349 | 0,291 | 0,515 | 0,00116  | 4 | Aicda   |
| 1,09E-07 | 0,430669 | 0,32  | 0,133 | 0,001354 | 4 | Trim30b |
| 1,12E-07 | -0,50915 | 0,602 | 0,792 | 0,001382 | 4 | Atp5g2  |
| 1,33E-07 | -0,52112 | 0,078 | 0,317 | 0,001644 | 4 | Dstn    |
| 1,41E-07 | 0,489087 | 0,437 | 0,222 | 0,001749 | 4 | Zfp318  |
| 1,49E-07 | -0,66027 | 0,505 | 0,706 | 0,001842 | 4 | Txn1    |
| 1,51E-07 | -0,47268 | 0,951 | 0,967 | 0,001875 | 4 | Calm1   |
| 1,62E-07 | 0,540734 | 0,777 | 0,561 | 0,002003 | 4 | Bank1   |
| 1,7E-07  | 0,640085 | 0,524 | 0,307 | 0,002106 | 4 | Trim30a |
| 1,75E-07 | -0,31004 | 1     | 1     | 0,002164 | 4 | Actb    |
| 1,99E-07 | 0,482915 | 0,68  | 0,462 | 0,002469 | 4 | Stat3   |
| 2,27E-07 | -0,68025 | 0,155 | 0,4   | 0,002816 | 4 | Lpp     |
| 2,34E-07 | 0,548468 | 0,883 | 0,796 | 0,002901 | 4 | Ly86    |
| 2,52E-07 | -0,54557 | 0,573 | 0,75  | 0,003116 | 4 | Ywhae   |



|          |          |       |       |          |   |               |
|----------|----------|-------|-------|----------|---|---------------|
| 3,25E-07 | -0,61325 | 0,437 | 0,637 | 0,00403  | 4 | Ldha          |
| 3,46E-07 | -0,50833 | 0,078 | 0,321 | 0,004289 | 4 | Rgs2          |
| 3,62E-07 | -0,43596 | 0,99  | 0,992 | 0,004478 | 4 | Pabpc1        |
| 4,05E-07 | 0,602304 | 0,806 | 0,614 | 0,005014 | 4 | Helz2         |
| 4,32E-07 | 0,437513 | 0,262 | 0,104 | 0,005343 | 4 | Gbp3          |
| 4,36E-07 | 0,543562 | 0,388 | 0,208 | 0,005394 | 4 | Nampt         |
| 4,93E-07 | -0,86361 | 0,388 | 0,625 | 0,006106 | 4 | Pcna          |
| 4,98E-07 | -0,56534 | 0,544 | 0,697 | 0,006167 | 4 | Arpc5l        |
| 5,39E-07 | -0,43676 | 0,825 | 0,925 | 0,006673 | 4 | Rbm3          |
| 5,39E-07 | -0,83533 | 0,097 | 0,327 | 0,006677 | 4 | Mki67         |
| 5,6E-07  | -0,47663 | 0,398 | 0,639 | 0,006935 | 4 | Cox6b1        |
| 5,67E-07 | 0,313302 | 0,398 | 0,189 | 0,007014 | 4 | Scml4         |
| 6,07E-07 | -0,53664 | 0,097 | 0,328 | 0,007516 | 4 | Eaf2          |
| 6,19E-07 | -0,70811 | 0,35  | 0,569 | 0,007657 | 4 | Dusp2         |
| 6,68E-07 | 0,399523 | 0,146 | 0,041 | 0,008272 | 4 | Cmpk2         |
| 6,91E-07 | -0,44347 | 0,291 | 0,534 | 0,00856  | 4 | Nedd8         |
| 7,19E-07 | -0,55332 | 0,194 | 0,436 | 0,008907 | 4 | Mbd4          |
| 7,48E-07 | -0,44938 | 0,903 | 0,946 | 0,009264 | 4 | Nap1l1        |
| 7,49E-07 | 0,409354 | 0,718 | 0,511 | 0,009273 | 4 | Psmb9         |
| 7,58E-07 | -0,44746 | 0,738 | 0,861 | 0,009382 | 4 | Arpc4         |
| 9,09E-07 | -0,39195 | 0,01  | 0,208 | 0,011258 | 4 | Mybl1         |
| 9,4E-07  | 0,442925 | 0,757 | 0,606 | 0,011635 | 4 | Gimap1        |
| 9,63E-07 | -0,36663 | 1     | 1     | 0,011926 | 4 | mtNd3         |
| 9,73E-07 | -0,54643 | 0,66  | 0,779 | 0,01205  | 4 | Gapdh         |
| 1,05E-06 | -0,38214 | 0,971 | 0,987 | 0,012972 | 4 | Fth1          |
| 1,24E-06 | -0,45234 | 0,631 | 0,798 | 0,015393 | 4 | Srsf3         |
| 1,39E-06 | 0,494759 | 0,505 | 0,314 | 0,017255 | 4 | Rasgrp2       |
| 1,4E-06  | 0,310972 | 0,981 | 0,94  | 0,017279 | 4 | A630089N07Rik |
| 1,51E-06 | 0,46041  | 0,35  | 0,173 | 0,018671 | 4 | Slfn2         |
| 1,57E-06 | -0,4622  | 0,117 | 0,339 | 0,019478 | 4 | Synrg         |
| 1,57E-06 | -0,44142 | 0,087 | 0,307 | 0,019494 | 4 | Bzw2          |
| 1,82E-06 | 0,474746 | 0,67  | 0,472 | 0,022591 | 4 | Dock10        |
| 1,87E-06 | -0,39862 | 0,029 | 0,227 | 0,023191 | 4 | Rgs10         |
| 1,9E-06  | -0,38271 | 0,981 | 0,983 | 0,023464 | 4 | Arpc2         |
| 1,98E-06 | -0,41401 | 0,922 | 0,959 | 0,024484 | 4 | Myl6          |
| 2,1E-06  | 0,371592 | 0,466 | 0,257 | 0,025947 | 4 | Fgd2          |
| 2,19E-06 | -0,43839 | 0,553 | 0,755 | 0,027151 | 4 | Serf2         |
| 2,23E-06 | -0,50211 | 0,621 | 0,792 | 0,027639 | 4 | Anp32b        |
| 2,24E-06 | 0,406144 | 0,417 | 0,223 | 0,027743 | 4 | Eif2ak2       |
| 2,3E-06  | 0,369606 | 0,718 | 0,514 | 0,028454 | 4 | Dnajc7        |
| 2,64E-06 | -0,42488 | 0,126 | 0,355 | 0,032668 | 4 | Sema7a        |
| 2,77E-06 | -0,47813 | 0,136 | 0,354 | 0,03435  | 4 | Ell3          |
| 2,9E-06  | 0,278163 | 0,233 | 0,092 | 0,035939 | 4 | Fam46a        |
| 3,14E-06 | 0,501435 | 0,903 | 0,747 | 0,03882  | 4 | Il2rg         |
| 3,15E-06 | 0,314737 | 0,505 | 0,287 | 0,039002 | 4 | Acad9         |
| 3,2E-06  | -0,41163 | 0,136 | 0,364 | 0,039609 | 4 | Polr2g        |
| 3,83E-06 | -0,45568 | 0,573 | 0,722 | 0,047378 | 4 | Ube2d2a       |
| 4E-06    | 0,353213 | 0,942 | 0,805 | 0,049565 | 4 | Btg1          |
| 4,14E-06 | -0,52853 | 0,35  | 0,575 | 0,051307 | 4 | Foxo1         |
| 4,15E-06 | 0,385726 | 0,786 | 0,609 | 0,05135  | 4 | Tbc1d10c      |

|          |          |       |       |          |   |               |
|----------|----------|-------|-------|----------|---|---------------|
| 4,18E-06 | -0,43159 | 0,049 | 0,248 | 0,05179  | 4 | Mcm3          |
| 4,39E-06 | 0,35517  | 0,398 | 0,206 | 0,054388 | 4 | Arhgef18      |
| 4,65E-06 | -0,58574 | 0,476 | 0,654 | 0,057598 | 4 | Top1          |
| 4,73E-06 | -0,42108 | 0,427 | 0,641 | 0,058603 | 4 | Pold4         |
| 4,77E-06 | 0,498288 | 0,641 | 0,445 | 0,059014 | 4 | Filip1l       |
| 4,86E-06 | 0,47096  | 0,689 | 0,534 | 0,060193 | 4 | Psme2         |
| 4,95E-06 | -0,49824 | 0,233 | 0,465 | 0,061242 | 4 | Dck           |
| 5,37E-06 | -0,4079  | 0,311 | 0,524 | 0,066441 | 4 | Shfm1         |
| 5,43E-06 | -0,44828 | 0,369 | 0,594 | 0,067227 | 4 | Mdh1          |
| 5,66E-06 | -0,4539  | 0,087 | 0,292 | 0,070039 | 4 | Lipc          |
| 5,7E-06  | 0,323044 | 0,33  | 0,164 | 0,070531 | 4 | Casp4         |
| 5,82E-06 | -0,4678  | 0,379 | 0,609 | 0,072047 | 4 | Lrmp          |
| 5,84E-06 | -0,56972 | 0,398 | 0,607 | 0,072256 | 4 | Bach2         |
| 5,99E-06 | -0,42186 | 0,621 | 0,792 | 0,074213 | 4 | Cox8a         |
| 6,17E-06 | 0,334442 | 0,398 | 0,206 | 0,076342 | 4 | S1pr1         |
| 6,41E-06 | 0,330296 | 0,427 | 0,231 | 0,079406 | 4 | Gpr183        |
| 6,43E-06 | -0,28689 | 0     | 0,167 | 0,079559 | 4 | Ada           |
| 8,06E-06 | 0,35406  | 0,223 | 0,094 | 0,099803 | 4 | Mllt3         |
| 8,13E-06 | -0,4853  | 0,262 | 0,467 | 0,100638 | 4 | Rfc1          |
| 8,35E-06 | 0,406297 | 0,796 | 0,593 | 0,10339  | 4 | Lmo2          |
| 8,59E-06 | -0,34975 | 0,01  | 0,179 | 0,106393 | 4 | Gatm          |
| 8,96E-06 | -0,52152 | 0,379 | 0,574 | 0,11093  | 4 | Scaf11        |
| 9,03E-06 | -0,67131 | 0,204 | 0,405 | 0,111766 | 4 | Mcm6          |
| 9,03E-06 | 0,537501 | 0,291 | 0,144 | 0,111828 | 4 | Socs1         |
| 9,49E-06 | -0,48975 | 0,184 | 0,387 | 0,117447 | 4 | 2700029M09Rik |
| 9,9E-06  | -0,40319 | 0,408 | 0,588 | 0,122593 | 4 | Oaz1          |
| 1,06E-05 | -0,40524 | 0,078 | 0,269 | 0,13077  | 4 | Emid1         |
| 1,06E-05 | 0,513524 | 0,485 | 0,318 | 0,130932 | 4 | Adar          |
| 1,14E-05 | 0,434347 | 0,67  | 0,476 | 0,1412   | 4 | Txnip         |
| 1,21E-05 | -0,36185 | 0,291 | 0,511 | 0,149747 | 4 | Hprt          |
| 1,31E-05 | -0,35153 | 0,029 | 0,202 | 0,161734 | 4 | Endou         |
| 1,32E-05 | -0,33424 | 1     | 0,997 | 0,162895 | 4 | Rplp0         |
| 1,33E-05 | 0,263281 | 0,155 | 0,053 | 0,164296 | 4 | Gm6548        |
| 1,36E-05 | -0,66779 | 0,097 | 0,282 | 0,167771 | 4 | Top2a         |
| 1,39E-05 | 0,32051  | 0,427 | 0,238 | 0,171768 | 4 | Hhex          |
| 1,44E-05 | -0,41245 | 0,913 | 0,962 | 0,178328 | 4 | Npm1          |
| 1,52E-05 | -0,3089  | 1     | 0,991 | 0,188106 | 4 | H3f3a         |
| 1,61E-05 | 0,430783 | 0,67  | 0,5   | 0,198964 | 4 | Cd47          |
| 1,67E-05 | 0,256599 | 0,126 | 0,039 | 0,206423 | 4 | Cdh17         |
| 1,7E-05  | -0,39333 | 0,068 | 0,254 | 0,210281 | 4 | Dut           |
| 1,71E-05 | -0,41152 | 0,961 | 0,982 | 0,211606 | 4 | Laptm5        |
| 1,76E-05 | -0,42526 | 0,583 | 0,735 | 0,217786 | 4 | Atp5g3        |
| 1,79E-05 | -0,46396 | 0,214 | 0,417 | 0,221834 | 4 | Nme1          |
| 1,88E-05 | -0,35596 | 0,175 | 0,398 | 0,232439 | 4 | Calm3         |
| 1,9E-05  | -0,39885 | 0,34  | 0,556 | 0,235292 | 4 | Tomm20        |
| 1,92E-05 | -0,34975 | 0,01  | 0,168 | 0,23717  | 4 | Uhrf1         |
| 1,92E-05 | -0,4352  | 0,136 | 0,328 | 0,237433 | 4 | Naa40         |
| 1,99E-05 | -0,3652  | 0,019 | 0,182 | 0,246913 | 4 | H1fx          |
| 2,01E-05 | -0,33533 | 0,097 | 0,293 | 0,248967 | 4 | Mttr14        |
| 2,05E-05 | 0,333017 | 0,524 | 0,34  | 0,25401  | 4 | Uba7          |

|          |          |       |       |          |   |               |
|----------|----------|-------|-------|----------|---|---------------|
| 2,06E-05 | -0,39272 | 0,194 | 0,394 | 0,255485 | 4 | Ubxn1         |
| 2,13E-05 | -0,42832 | 0,66  | 0,791 | 0,264269 | 4 | Mzb1          |
| 2,13E-05 | -0,40099 | 0,447 | 0,627 | 0,2643   | 4 | Cct2          |
| 2,15E-05 | 0,374102 | 0,913 | 0,856 | 0,265745 | 4 | Mcl1          |
| 2,22E-05 | -0,27028 | 0,029 | 0,202 | 0,27522  | 4 | Cdca7         |
| 2,75E-05 | 0,340539 | 0,874 | 0,741 | 0,339908 | 4 | Hmha1         |
| 2,75E-05 | 0,407856 | 0,456 | 0,274 | 0,34064  | 4 | Esyt1         |
| 2,76E-05 | 0,275169 | 0,311 | 0,153 | 0,341378 | 4 | 2310001H17Rik |
| 3,14E-05 | -0,44666 | 0,466 | 0,679 | 0,389167 | 4 | Smim14        |
| 3,35E-05 | -0,38473 | 0,534 | 0,712 | 0,415123 | 4 | Tnfaip8       |
| 3,36E-05 | -0,28376 | 0,029 | 0,19  | 0,41584  | 4 | Neil1         |
| 3,55E-05 | 0,384333 | 0,845 | 0,73  | 0,439382 | 4 | Stk17b        |
| 3,55E-05 | 0,388086 | 0,583 | 0,381 | 0,439739 | 4 | Dgka          |
| 3,59E-05 | 0,278607 | 0,35  | 0,192 | 0,444132 | 4 | Lime1         |
| 3,6E-05  | -0,60294 | 0,087 | 0,265 | 0,445918 | 4 | Nrgn          |
| 3,63E-05 | -0,28003 | 0,136 | 0,341 | 0,44975  | 4 | Lpin2         |
| 4,19E-05 | -0,68999 | 0,068 | 0,236 | 0,518133 | 4 | 2810417H13Rik |
| 4,23E-05 | 0,3266   | 0,233 | 0,106 | 0,523689 | 4 | Got1          |
| 4,52E-05 | -0,34709 | 0,961 | 0,99  | 0,560112 | 4 | Coro1a        |
| 4,73E-05 | 0,342647 | 0,786 | 0,63  | 0,585692 | 4 | Lbh           |
| 5,09E-05 | -0,44393 | 0,204 | 0,398 | 0,630613 | 4 | Anxa2         |
| 5,48E-05 | -0,35864 | 0,534 | 0,703 | 0,678988 | 4 | Hnrnpk        |
| 5,57E-05 | -0,44213 | 0,282 | 0,459 | 0,689651 | 4 | Hipk3         |
| 5,59E-05 | -0,39658 | 0,874 | 0,916 | 0,692618 | 4 | Ppia          |
| 5,6E-05  | 0,397396 | 0,903 | 0,738 | 0,693715 | 4 | Ltb           |
| 5,62E-05 | -0,50881 | 0,408 | 0,594 | 0,695324 | 4 | Mbd2          |
| 5,78E-05 | -0,38322 | 0,078 | 0,249 | 0,715316 | 4 | Mcm2          |
| 6,16E-05 | -0,3159  | 0,718 | 0,852 | 0,763049 | 4 | Limd2         |
| 6,31E-05 | -0,37697 | 0,757 | 0,869 | 0,781682 | 4 | Tnfrsf13c     |
| 6,47E-05 | 0,408015 | 0,563 | 0,379 | 0,800637 | 4 | Stk10         |
| 6,51E-05 | -0,3728  | 0,049 | 0,207 | 0,806078 | 4 | Prim1         |
| 6,57E-05 | -0,4088  | 0,602 | 0,75  | 0,813426 | 4 | Dynll1        |
| 6,66E-05 | -0,37368 | 0,01  | 0,151 | 0,825048 | 4 | Cenpe         |
| 6,8E-05  | -0,49295 | 0,427 | 0,579 | 0,841683 | 4 | Tmem131       |
| 6,82E-05 | 0,28142  | 0,311 | 0,161 | 0,844539 | 4 | Cd97          |
| 6,95E-05 | -0,37194 | 0,078 | 0,251 | 0,860468 | 4 | Cdc14b        |
| 6,95E-05 | -0,35971 | 0,078 | 0,248 | 0,860528 | 4 | Sh2b2         |
| 7,1E-05  | -0,39613 | 0,951 | 0,958 | 0,878591 | 4 | Pfn1          |
| 7,11E-05 | 0,325702 | 0,835 | 0,672 | 0,879731 | 4 | Scd1          |
| 7,11E-05 | -0,40284 | 0,126 | 0,296 | 0,880709 | 4 | Xrcc1         |
| 7,28E-05 | -0,30547 | 0,019 | 0,165 | 0,90099  | 4 | Ccdc17        |
| 7,38E-05 | -0,43176 | 0,417 | 0,58  | 0,913078 | 4 | Atp6v1f       |
| 7,39E-05 | 0,401009 | 0,262 | 0,133 | 0,915379 | 4 | Trim30d       |
| 7,44E-05 | 0,312709 | 0,515 | 0,318 | 0,920542 | 4 | Ier5          |
| 7,44E-05 | -0,25774 | 0,039 | 0,198 | 0,920873 | 4 | Pla2g12a      |
| 7,54E-05 | -0,39753 | 0,204 | 0,394 | 0,933508 | 4 | Tpi1          |
| 7,66E-05 | -0,37739 | 0,68  | 0,822 | 0,947759 | 4 | Hnrnpa3       |
| 7,75E-05 | -0,38684 | 0,379 | 0,55  | 0,960022 | 4 | Ppp4r2        |
| 8,13E-05 | 0,30504  | 0,67  | 0,484 | 1        | 4 | Itga4         |
| 8,13E-05 | -0,36644 | 0,524 | 0,722 | 1        | 4 | Arhgdia       |

|          |          |       |       |     |               |
|----------|----------|-------|-------|-----|---------------|
| 9,04E-05 | -0,43802 | 0,223 | 0,399 | 1 4 | Pnp           |
| 9,13E-05 | 0,301905 | 0,68  | 0,523 | 1 4 | Wdfy4         |
| 9,13E-05 | -0,29604 | 0,184 | 0,387 | 1 4 | Taf9          |
| 9,17E-05 | 0,260017 | 0,175 | 0,071 | 1 4 | Mfhas1        |
| 9,29E-05 | -0,37463 | 0,165 | 0,346 | 1 4 | Bid           |
| 9,34E-05 | -0,3231  | 0,078 | 0,247 | 1 4 | Cecr2         |
| 9,39E-05 | -0,3468  | 0,243 | 0,456 | 1 4 | Akt1          |
| 9,6E-05  | -0,25216 | 0,049 | 0,211 | 1 4 | Cnst          |
| 9,61E-05 | -0,28132 | 0,029 | 0,178 | 1 4 | Rnaseh2b      |
| 9,78E-05 | -0,26642 | 0,049 | 0,206 | 1 4 | Gng12         |
| 9,95E-05 | -0,36394 | 0,058 | 0,216 | 1 4 | Cyp51         |
| 0,0001   | -0,28261 | 0,049 | 0,205 | 1 4 | Amz2          |
| 0,0001   | -0,2738  | 0,087 | 0,255 | 1 4 | Mprip         |
| 0,000101 | 0,262555 | 0,282 | 0,142 | 1 4 | Ckap4         |
| 0,000101 | -0,38817 | 0,214 | 0,4   | 1 4 | Rev3l         |
| 0,000102 | 0,420192 | 0,825 | 0,725 | 1 4 | Tmbim6        |
| 0,000104 | 0,253326 | 0,437 | 0,264 | 1 4 | Lypla1        |
| 0,000105 | -0,34043 | 0,408 | 0,601 | 1 4 | Usp7          |
| 0,000106 | -0,38726 | 0,01  | 0,145 | 1 4 | Ccnb2         |
| 0,000107 | -0,43196 | 0,553 | 0,725 | 1 4 | Hnrnpab       |
| 0,000111 | -0,27105 | 0,01  | 0,144 | 1 4 | Dtl           |
| 0,000112 | -0,34919 | 0,049 | 0,206 | 1 4 | Lig1          |
| 0,000113 | -0,36103 | 0,184 | 0,366 | 1 4 | Sh3bgrl       |
| 0,000122 | -0,27837 | 1     | 0,999 | 1 4 | Rpl41         |
| 0,000127 | -0,41431 | 0,068 | 0,228 | 1 4 | Cks2          |
| 0,000129 | -0,42207 | 0,447 | 0,591 | 1 4 | Tcea1         |
| 0,00013  | -0,35856 | 0,272 | 0,458 | 1 4 | Csnk2b        |
| 0,000132 | -0,28188 | 0,117 | 0,296 | 1 4 | Cnih          |
| 0,000132 | 0,285232 | 0,262 | 0,133 | 1 4 | Tsc22d3       |
| 0,000136 | -0,40369 | 0,087 | 0,244 | 1 4 | Mcm4          |
| 0,000137 | -0,30472 | 0,107 | 0,275 | 1 4 | Ruvbl2        |
| 0,000137 | 0,280325 | 0,398 | 0,243 | 1 4 | 2900060B14Rik |
| 0,000138 | -0,25022 | 0,019 | 0,157 | 1 4 | Gmnn          |
| 0,000143 | 0,279621 | 0,883 | 0,789 | 1 4 | Faim3         |
| 0,000145 | -0,29849 | 0,243 | 0,431 | 1 4 | Lsm4          |
| 0,00015  | 0,340017 | 0,583 | 0,399 | 1 4 | Tnrc6b        |
| 0,000156 | -0,26241 | 0,155 | 0,345 | 1 4 | Qars          |
| 0,000157 | -0,28096 | 0,272 | 0,46  | 1 4 | Nhp2l1        |
| 0,000158 | -0,36535 | 0,214 | 0,384 | 1 4 | Ktn1          |
| 0,000167 | 0,312348 | 0,262 | 0,133 | 1 4 | Arap2         |
| 0,000167 | -0,44353 | 0,136 | 0,306 | 1 4 | Lacc1         |
| 0,000179 | -0,37634 | 0,408 | 0,582 | 1 4 | Polr1d        |
| 0,00018  | 0,335576 | 0,515 | 0,346 | 1 4 | Myl12b        |
| 0,00018  | -0,43577 | 0,816 | 0,862 | 1 4 | Cnn2          |
| 0,000181 | 0,270468 | 0,505 | 0,325 | 1 4 | Rabac1        |
| 0,000183 | -0,28135 | 0,146 | 0,319 | 1 4 | Ndufa11       |
| 0,000183 | -0,52037 | 0,32  | 0,486 | 1 4 | Hpse          |
| 0,000183 | 0,28304  | 0,612 | 0,444 | 1 4 | Psap          |
| 0,000194 | 0,340165 | 0,631 | 0,522 | 1 4 | Cxcr5         |
| 0,000194 | 0,409168 | 0,728 | 0,617 | 1 4 | Snx2          |

|          |          |       |       |     |               |
|----------|----------|-------|-------|-----|---------------|
| 0,000197 | -0,33533 | 0,524 | 0,692 | 1 4 | Atp5c1        |
| 0,0002   | -0,34486 | 0,32  | 0,499 | 1 4 | Arpc3         |
| 0,000201 | -0,37533 | 0,398 | 0,571 | 1 4 | Psmb7         |
| 0,00021  | 0,360494 | 0,447 | 0,304 | 1 4 | Birc3         |
| 0,000212 | -0,34724 | 0,282 | 0,464 | 1 4 | Cct8          |
| 0,000222 | -0,26571 | 0,136 | 0,313 | 1 4 | Thoc7         |
| 0,000224 | -0,28628 | 0,99  | 0,993 | 1 4 | Rpl28         |
| 0,000234 | -0,41335 | 0,35  | 0,523 | 1 4 | Lsm14a        |
| 0,000235 | -0,28385 | 0,058 | 0,208 | 1 4 | Rpf1          |
| 0,000239 | -0,32444 | 0,175 | 0,345 | 1 4 | Ndufv2        |
| 0,000241 | 0,30604  | 0,301 | 0,169 | 1 4 | Nt5c3         |
| 0,00026  | -0,29177 | 0,087 | 0,25  | 1 4 | Fut8          |
| 0,00026  | -0,31018 | 0,233 | 0,411 | 1 4 | Ap2s1         |
| 0,000264 | -0,36999 | 0,136 | 0,294 | 1 4 | Tgfbr1        |
| 0,000268 | -0,34169 | 0,107 | 0,263 | 1 4 | Hat1          |
| 0,000269 | -0,35941 | 0,165 | 0,325 | 1 4 | Psmd1         |
| 0,000278 | -0,31059 | 0,184 | 0,365 | 1 4 | Snrpd1        |
| 0,000279 | -0,39351 | 0,107 | 0,263 | 1 4 | Asf1b         |
| 0,000279 | 0,269946 | 0,99  | 0,998 | 1 4 | Ddx5          |
| 0,000283 | -0,32047 | 0,117 | 0,279 | 1 4 | Havcr1        |
| 0,000291 | 0,25088  | 0,359 | 0,21  | 1 4 | Vps13b        |
| 0,000292 | -0,27704 | 0,097 | 0,254 | 1 4 | Mrps18c       |
| 0,000294 | -0,30878 | 0,874 | 0,935 | 1 4 | H3f3b         |
| 0,000302 | -0,32301 | 0,359 | 0,547 | 1 4 | Pik3c2b       |
| 0,000304 | -0,37472 | 0,262 | 0,422 | 1 4 | D930015E06Rik |
| 0,000307 | 0,25776  | 0,33  | 0,188 | 1 4 | P2ry10        |
| 0,000322 | -0,37314 | 0,243 | 0,413 | 1 4 | Odc1          |
| 0,000332 | -0,35729 | 0,35  | 0,518 | 1 4 | Erh           |
| 0,000342 | 0,253926 | 0,214 | 0,104 | 1 4 | Runx3         |
| 0,000352 | -0,28607 | 0,233 | 0,409 | 1 4 | Psme3         |
| 0,000372 | -0,27663 | 0,602 | 0,705 | 1 4 | Sumo2         |
| 0,000385 | -0,28294 | 0,233 | 0,42  | 1 4 | Slc25a19      |
| 0,000396 | -0,44595 | 0,524 | 0,644 | 1 4 | Crip1         |
| 0,000398 | -0,45699 | 0,068 | 0,208 | 1 4 | Rrm2          |
| 0,0004   | -0,35575 | 0,301 | 0,464 | 1 4 | Coro1b        |
| 0,000409 | 0,304067 | 0,155 | 0,067 | 1 4 | Vps37b        |
| 0,000411 | -0,36845 | 0,223 | 0,389 | 1 4 | Slbp          |
| 0,000417 | -0,31124 | 0,66  | 0,785 | 1 4 | Tma7          |
| 0,000421 | -0,27558 | 0,097 | 0,252 | 1 4 | Nasp          |
| 0,000426 | -0,27159 | 0,049 | 0,182 | 1 4 | Tipin         |
| 0,000442 | -0,29399 | 0,126 | 0,29  | 1 4 | Acadl         |
| 0,000443 | -0,30019 | 0,087 | 0,23  | 1 4 | Rnf41         |
| 0,000446 | -0,35826 | 0,126 | 0,284 | 1 4 | Vpreb3        |
| 0,000447 | -0,27677 | 0,01  | 0,124 | 1 4 | Cdk1          |
| 0,000448 | 0,291851 | 0,398 | 0,251 | 1 4 | Smarca2       |
| 0,000452 | -0,29392 | 0,184 | 0,346 | 1 4 | D8Ertd738e    |
| 0,000454 | 0,303169 | 0,553 | 0,382 | 1 4 | Zfp36         |
| 0,000454 | -0,35953 | 0,466 | 0,606 | 1 4 | Hnrnpa0       |
| 0,000458 | -0,42029 | 0,709 | 0,802 | 1 4 | Hmgbl1        |
| 0,00046  | -0,27656 | 0,184 | 0,35  | 1 4 | Brwd1         |

|          |          |       |       |     |          |
|----------|----------|-------|-------|-----|----------|
| 0,000465 | -0,34063 | 0,204 | 0,38  | 1 4 | Asap1    |
| 0,000488 | 0,349049 | 0,184 | 0,087 | 1 4 | Fcr15    |
| 0,000496 | -0,27763 | 0,039 | 0,166 | 1 4 | Efnb1    |
| 0,000521 | 0,290899 | 0,388 | 0,244 | 1 4 | Pecam1   |
| 0,000523 | -0,25276 | 0,049 | 0,181 | 1 4 | Cep164   |
| 0,000526 | -0,29893 | 0     | 0,105 | 1 4 | Ccna2    |
| 0,000534 | -0,36915 | 0,505 | 0,666 | 1 4 | Banf1    |
| 0,000537 | -0,32773 | 0,534 | 0,684 | 1 4 | Purb     |
| 0,00054  | -0,26716 | 0,117 | 0,268 | 1 4 | Nudt21   |
| 0,000543 | -0,31553 | 0,107 | 0,251 | 1 4 | Ccnd3    |
| 0,000552 | -0,25405 | 0,019 | 0,137 | 1 4 | H1f0     |
| 0,000559 | -0,29014 | 0,087 | 0,234 | 1 4 | Ildr1    |
| 0,000561 | 0,307794 | 0,67  | 0,51  | 1 4 | Nfkbia   |
| 0,000563 | -0,27233 | 0,097 | 0,242 | 1 4 | Brd7     |
| 0,000565 | -0,26101 | 0,136 | 0,301 | 1 4 | Eif2a    |
| 0,000568 | -0,2879  | 0,107 | 0,252 | 1 4 | Ndufb8   |
| 0,000572 | 0,387612 | 0,786 | 0,601 | 1 4 | Mll5     |
| 0,000602 | 0,255345 | 0,563 | 0,401 | 1 4 | Add3     |
| 0,000604 | -0,26745 | 0,194 | 0,368 | 1 4 | Arl5a    |
| 0,000616 | -0,29273 | 0,233 | 0,395 | 1 4 | eGFP     |
| 0,000622 | -0,31753 | 0,146 | 0,299 | 1 4 | Eif2ak3  |
| 0,00063  | -0,36619 | 0,282 | 0,446 | 1 4 | Cdk2ap2  |
| 0,000632 | -0,34556 | 0,282 | 0,457 | 1 4 | Cerk     |
| 0,000636 | -0,32526 | 0,155 | 0,306 | 1 4 | Prkd3    |
| 0,000639 | -0,27281 | 0,049 | 0,176 | 1 4 | Cpne5    |
| 0,000648 | -0,25357 | 0,078 | 0,221 | 1 4 | Rrm1     |
| 0,00065  | -0,27785 | 0,049 | 0,18  | 1 4 | Nmral1   |
| 0,00065  | 0,269427 | 0,515 | 0,352 | 1 4 | Lrrc2    |
| 0,000651 | 0,409364 | 0,204 | 0,105 | 1 4 | Herc6    |
| 0,000658 | -0,25341 | 0,019 | 0,134 | 1 4 | Tcf19    |
| 0,000669 | 0,258307 | 0,359 | 0,219 | 1 4 | Ppcs     |
| 0,00067  | -0,26558 | 0,078 | 0,215 | 1 4 | Abr      |
| 0,000674 | -0,38229 | 0,359 | 0,508 | 1 4 | Id3      |
| 0,000676 | 0,428988 | 0,689 | 0,567 | 1 4 | Tapbp    |
| 0,000683 | -0,40981 | 0,214 | 0,364 | 1 4 | Pafah1b3 |
| 0,000701 | 0,270146 | 0,816 | 0,767 | 1 4 | Arhgef1  |
| 0,000703 | -0,28391 | 0,301 | 0,473 | 1 4 | Eif3l    |
| 0,000706 | -0,31719 | 0,097 | 0,234 | 1 4 | Gadd45b  |
| 0,000715 | -0,29246 | 0,165 | 0,328 | 1 4 | Dnmt1    |
| 0,000717 | -0,27998 | 0,447 | 0,629 | 1 4 | Ppp1cc   |
| 0,000726 | 0,278312 | 0,437 | 0,292 | 1 4 | Sharnin  |
| 0,000731 | -0,34263 | 0,66  | 0,776 | 1 4 | Atp5b    |
| 0,000733 | -0,35796 | 0,34  | 0,495 | 1 4 | Fermt3   |
| 0,000735 | 0,326704 | 0,524 | 0,39  | 1 4 | Rasa3    |
| 0,000756 | -0,30963 | 0,689 | 0,766 | 1 4 | Capzb    |
| 0,000759 | -0,28855 | 0,078 | 0,213 | 1 4 | H2afx    |
| 0,000766 | -0,36043 | 0,65  | 0,784 | 1 4 | Srsf2    |
| 0,00077  | 0,26692  | 0,282 | 0,156 | 1 4 | Trim21   |
| 0,000786 | 0,309178 | 0,437 | 0,297 | 1 4 | Tmod3    |
| 0,000811 | -0,35796 | 0,301 | 0,459 | 1 4 | Psip1    |

|          |          |       |       |     |          |
|----------|----------|-------|-------|-----|----------|
| 0,000841 | -0,3109  | 0,252 | 0,414 | 1 4 | Tpd52    |
| 0,000842 | 0,269545 | 0,505 | 0,348 | 1 4 | Abhd17b  |
| 0,000844 | -0,30847 | 0,223 | 0,379 | 1 4 | Usmg5    |
| 0,000848 | -0,2712  | 0,175 | 0,331 | 1 4 | Ak2      |
| 0,00085  | -0,28442 | 0,058 | 0,185 | 1 4 | Smim20   |
| 0,000867 | -0,26623 | 1     | 0,991 | 1 4 | Cd52     |
| 0,000882 | -0,27622 | 0,35  | 0,493 | 1 4 | Parp1    |
| 0,00089  | -0,27862 | 0,136 | 0,287 | 1 4 | Mrpl42   |
| 0,00092  | -0,253   | 0,146 | 0,298 | 1 4 | Tmem14c  |
| 0,000932 | 0,349943 | 0,573 | 0,452 | 1 4 | Dgkd     |
| 0,000938 | -0,27685 | 0,272 | 0,442 | 1 4 | Atp5k    |
| 0,000941 | 0,346354 | 0,33  | 0,202 | 1 4 | Phf11b   |
| 0,000947 | -0,27517 | 0,146 | 0,304 | 1 4 | Trp53    |
| 0,000948 | 0,290893 | 0,408 | 0,271 | 1 4 | Ppp3cc   |
| 0,000953 | -0,3327  | 0,709 | 0,787 | 1 4 | Clic1    |
| 0,000958 | 0,352311 | 0,466 | 0,325 | 1 4 | Zmym5    |
| 0,000964 | -0,25245 | 0,243 | 0,411 | 1 4 | Fam107b  |
| 0,00097  | -0,30892 | 0,505 | 0,672 | 1 4 | Prdx1    |
| 0,000974 | -0,28273 | 0,214 | 0,37  | 1 4 | Al662270 |
| 0,000982 | -0,3559  | 0,068 | 0,196 | 1 4 | Dhfr     |
| 0,001001 | -0,46199 | 0,689 | 0,798 | 1 4 | Tubb5    |
| 0,001004 | -0,35031 | 0,534 | 0,671 | 1 4 | Ppp1ca   |
| 0,001025 | -0,28381 | 0,243 | 0,421 | 1 4 | Slc25a4  |
| 0,001028 | -0,30402 | 0,553 | 0,668 | 1 4 | Eif3h    |
| 0,001035 | -0,30424 | 0,194 | 0,351 | 1 4 | Bcl7a    |
| 0,001049 | -0,30861 | 0,087 | 0,221 | 1 4 | Siah2    |
| 0,00106  | -0,25894 | 0,165 | 0,32  | 1 4 | Eif1ax   |
| 0,001063 | -0,29221 | 0,204 | 0,356 | 1 4 | Rps27l   |
| 0,001075 | 0,261273 | 0,282 | 0,164 | 1 4 | H2-K2    |
| 0,001102 | -0,2646  | 0,058 | 0,183 | 1 4 | Ngfrap1  |
| 0,001127 | -0,31496 | 0,524 | 0,668 | 1 4 | Cox6c    |
| 0,001131 | -0,34415 | 0,35  | 0,497 | 1 4 | Ghitm    |
| 0,001136 | 0,31151  | 0,524 | 0,376 | 1 4 | Cbfa2t3  |
| 0,00114  | -0,33418 | 0,379 | 0,524 | 1 4 | Gng5     |
| 0,001146 | -0,26433 | 0,126 | 0,266 | 1 4 | Ube2m    |
| 0,001159 | 0,37882  | 0,505 | 0,384 | 1 4 | Il4ra    |
| 0,001161 | 0,440128 | 0,68  | 0,588 | 1 4 | Etnk1    |
| 0,001175 | 0,326023 | 0,437 | 0,297 | 1 4 | Trim12a  |
| 0,001187 | -0,33667 | 0,485 | 0,618 | 1 4 | Myl12a   |
| 0,001191 | 0,281631 | 0,816 | 0,72  | 1 4 | Iqgap1   |
| 0,001216 | -0,27925 | 0,184 | 0,345 | 1 4 | H2afv    |
| 0,001224 | -0,27374 | 0,476 | 0,612 | 1 4 | Prkcd    |
| 0,00125  | 0,31188  | 0,612 | 0,469 | 1 4 | Mgat1    |
| 0,001255 | 0,352909 | 0,466 | 0,32  | 1 4 | Pde4b    |
| 0,001256 | 0,318521 | 0,553 | 0,422 | 1 4 | Nrd1     |
| 0,001271 | -0,27158 | 0,126 | 0,268 | 1 4 | Trappc1  |
| 0,001295 | -0,25865 | 0,33  | 0,492 | 1 4 | Lbr      |
| 0,001296 | 0,314409 | 0,66  | 0,562 | 1 4 | Napsa    |
| 0,001332 | -0,25732 | 0,117 | 0,253 | 1 4 | Isyna1   |
| 0,001338 | 0,261315 | 0,718 | 0,561 | 1 4 | Arhgap4  |

|          |          |       |       |     |               |
|----------|----------|-------|-------|-----|---------------|
| 0,001353 | 0,270026 | 0,272 | 0,16  | 1 4 | Gsdmd         |
| 0,001372 | -0,34455 | 0,194 | 0,338 | 1 4 | Mcm7          |
| 0,001405 | -0,30317 | 0,301 | 0,45  | 1 4 | Cmpk1         |
| 0,001407 | -0,29666 | 0,262 | 0,407 | 1 4 | Usf2          |
| 0,001434 | -0,33236 | 0,184 | 0,327 | 1 4 | Lta           |
| 0,001444 | -0,26414 | 0,126 | 0,267 | 1 4 | Zdhhc6        |
| 0,001467 | -0,31941 | 0,107 | 0,238 | 1 4 | Ncapd2        |
| 0,001477 | -0,34752 | 0,359 | 0,506 | 1 4 | Pgk1          |
| 0,001569 | -0,31863 | 0,379 | 0,533 | 1 4 | Tceb2         |
| 0,001609 | 0,334795 | 0,951 | 0,886 | 1 4 | Zfp3611       |
| 0,001624 | -0,35464 | 0,252 | 0,392 | 1 4 | Il21r         |
| 0,001639 | -0,27638 | 0,806 | 0,866 | 1 4 | Naca          |
| 0,001663 | 0,360376 | 0,767 | 0,671 | 1 4 | Fam111a       |
| 0,00167  | -0,26117 | 0,136 | 0,272 | 1 4 | Fam96a        |
| 0,00168  | -0,33165 | 0,243 | 0,382 | 1 4 | Naa50         |
| 0,001703 | -0,29538 | 0,243 | 0,385 | 1 4 | Sdhd          |
| 0,001719 | 0,303514 | 0,379 | 0,249 | 1 4 | A230046K03Rik |
| 0,001737 | -0,26275 | 0,922 | 0,948 | 1 4 | Rps26         |
| 0,00176  | -0,27022 | 0,039 | 0,148 | 1 4 | Tpx2          |
| 0,00179  | 0,279019 | 0,874 | 0,852 | 1 4 | Eif4a2        |
| 0,001798 | 0,329105 | 0,621 | 0,481 | 1 4 | Irf2          |
| 0,001827 | 0,305394 | 0,631 | 0,499 | 1 4 | Gpr18         |
| 0,001869 | -0,35642 | 0,447 | 0,556 | 1 4 | Atp5j         |
| 0,001879 | 0,412691 | 0,466 | 0,327 | 1 4 | St3gal1       |
| 0,001899 | 0,284765 | 0,155 | 0,074 | 1 4 | Map3k8        |
| 0,00193  | 0,318608 | 0,592 | 0,452 | 1 4 | Slc44a2       |
| 0,001946 | 0,29562  | 0,369 | 0,244 | 1 4 | Aff3          |
| 0,001956 | -0,31973 | 0,252 | 0,383 | 1 4 | Ube2n         |
| 0,001972 | -0,30235 | 0,078 | 0,199 | 1 4 | Cpm           |
| 0,00201  | -0,36563 | 0,359 | 0,5   | 1 4 | Tmpo          |
| 0,002049 | -0,31339 | 0,34  | 0,462 | 1 4 | Atp5j2        |
| 0,002071 | -0,41895 | 0,126 | 0,25  | 1 4 | Mcm5          |
| 0,002102 | 0,32832  | 0,379 | 0,253 | 1 4 | Hltf          |
| 0,00211  | -0,31067 | 0,165 | 0,294 | 1 4 | Trib2         |
| 0,002127 | 0,281448 | 0,379 | 0,254 | 1 4 | Arhgap15      |
| 0,002137 | -0,30245 | 0,175 | 0,308 | 1 4 | Cetn3         |
| 0,002171 | -0,32536 | 0,311 | 0,441 | 1 4 | Ube2j1        |
| 0,002179 | -0,27245 | 0,291 | 0,441 | 1 4 | Phf6          |
| 0,002206 | 0,298804 | 0,379 | 0,249 | 1 4 | Wdfy1         |
| 0,002214 | -0,30032 | 0,252 | 0,401 | 1 4 | Cxcr4         |
| 0,002319 | -0,27818 | 0,311 | 0,473 | 1 4 | Eif4a1        |
| 0,002389 | 0,329226 | 0,388 | 0,26  | 1 4 | Man1a         |
| 0,002393 | 0,337825 | 0,427 | 0,308 | 1 4 | Rnase6        |
| 0,002466 | -0,2715  | 0,252 | 0,396 | 1 4 | Preli1        |
| 0,002476 | -0,33732 | 0,301 | 0,434 | 1 4 | Mapre2        |
| 0,002512 | 0,309488 | 0,505 | 0,377 | 1 4 | Clic4         |
| 0,002604 | 0,280726 | 0,485 | 0,361 | 1 4 | Mllt6         |
| 0,00284  | -0,26944 | 0,359 | 0,505 | 1 4 | Atp5f1        |
| 0,002856 | -0,39788 | 0,563 | 0,671 | 1 4 | Srsf11        |
| 0,002891 | -0,3108  | 0,408 | 0,521 | 1 4 | Eif2s2        |



|          |          |       |       |     |               |
|----------|----------|-------|-------|-----|---------------|
| 0,002994 | -0,35895 | 0,456 | 0,613 | 1 4 | Gna13         |
| 0,003024 | 0,381592 | 0,476 | 0,347 | 1 4 | Ankrd44       |
| 0,003066 | -0,26347 | 0,398 | 0,546 | 1 4 | Psma7         |
| 0,00308  | 0,275382 | 0,359 | 0,244 | 1 4 | Clec2d        |
| 0,003085 | -0,29759 | 0,155 | 0,277 | 1 4 | Ap3b1         |
| 0,003144 | -0,26376 | 0,155 | 0,295 | 1 4 | Ehd4          |
| 0,003181 | -0,26652 | 0,32  | 0,452 | 1 4 | Azin1         |
| 0,003241 | -0,2534  | 0,252 | 0,395 | 1 4 | Vdac3         |
| 0,003325 | 0,284478 | 0,592 | 0,456 | 1 4 | Pld4          |
| 0,003335 | -0,29311 | 0,398 | 0,519 | 1 4 | Snrpb         |
| 0,003438 | -0,26992 | 0,155 | 0,288 | 1 4 | Cstb          |
| 0,003451 | -0,30503 | 0,272 | 0,415 | 1 4 | Edem1         |
| 0,003468 | -0,25273 | 0,146 | 0,272 | 1 4 | Cyb5b         |
| 0,00351  | -0,31697 | 0,136 | 0,257 | 1 4 | Psat1         |
| 0,003613 | -0,25201 | 0,262 | 0,396 | 1 4 | Pptc7         |
| 0,003661 | -0,26772 | 0,136 | 0,267 | 1 4 | Tti1          |
| 0,00367  | -0,26374 | 0,311 | 0,445 | 1 4 | Pa2g4         |
| 0,003694 | -0,25529 | 0,204 | 0,338 | 1 4 | Lck           |
| 0,003696 | -0,29216 | 0,233 | 0,373 | 1 4 | Rraga         |
| 0,003752 | -0,31192 | 0,165 | 0,289 | 1 4 | C130026I21Rik |
| 0,003755 | -0,27398 | 0,34  | 0,471 | 1 4 | Ptbp1         |
| 0,00378  | 0,349382 | 0,456 | 0,364 | 1 4 | Trim12c       |
| 0,003789 | -0,30175 | 0,398 | 0,547 | 1 4 | Apobec1       |
| 0,003824 | -0,25558 | 0,32  | 0,461 | 1 4 | Ndufa2        |
| 0,003835 | -0,30078 | 0,476 | 0,597 | 1 4 | Ap2m1         |
| 0,003888 | -0,28479 | 0,32  | 0,457 | 1 4 | Cdk2ap1       |
| 0,003929 | -0,31858 | 0,126 | 0,241 | 1 4 | Fam214a       |
| 0,003965 | 0,324724 | 0,689 | 0,589 | 1 4 | Zbtb20        |
| 0,004077 | 0,294761 | 0,728 | 0,631 | 1 4 | Psme1         |
| 0,004106 | 0,304841 | 0,524 | 0,414 | 1 4 | 1810026B05Rik |
| 0,004163 | -0,28197 | 0,184 | 0,305 | 1 4 | Akap2         |
| 0,004224 | -0,27834 | 0,806 | 0,849 | 1 4 | Set           |
| 0,004324 | -0,28651 | 0,311 | 0,426 | 1 4 | Eif2s1        |
| 0,004467 | -0,34385 | 0,301 | 0,421 | 1 4 | Ndufc2        |
| 0,004476 | 0,339656 | 0,262 | 0,17  | 1 4 | Dlgap4        |
| 0,004656 | -0,2598  | 0,165 | 0,287 | 1 4 | Ahcy          |
| 0,004716 | 0,36471  | 0,291 | 0,19  | 1 4 | Hbp1          |
| 0,00478  | -0,25147 | 0,204 | 0,342 | 1 4 | Dynlt3        |
| 0,004993 | -0,33281 | 0,34  | 0,45  | 1 4 | Sept7         |
| 0,005    | 0,27026  | 0,35  | 0,23  | 1 4 | Nin           |
| 0,005005 | -0,34764 | 0,379 | 0,501 | 1 4 | Wdr92         |
| 0,005485 | -0,32331 | 0,398 | 0,51  | 1 4 | Rbbp7         |
| 0,005856 | -0,27293 | 0,544 | 0,65  | 1 4 | Ikzf1         |
| 0,005874 | 0,308091 | 0,495 | 0,381 | 1 4 | Chd7          |
| 0,005962 | -0,26018 | 0,495 | 0,591 | 1 4 | Chd4          |
| 0,006018 | -0,25388 | 0,35  | 0,477 | 1 4 | Mapre1        |
| 0,00605  | -0,28835 | 0,301 | 0,416 | 1 4 | Abrac1        |
| 0,00606  | -0,27124 | 0,476 | 0,608 | 1 4 | Hnrnpm        |
| 0,006334 | -0,2961  | 0,204 | 0,32  | 1 4 | Whsc1         |
| 0,006731 | 0,252998 | 0,806 | 0,747 | 1 4 | Sp110         |

|          |          |       |       |            |               |
|----------|----------|-------|-------|------------|---------------|
| 0,006744 | -0,2715  | 0,612 | 0,72  | 1 4        | Eif3e         |
| 0,006858 | -0,30505 | 0,466 | 0,557 | 1 4        | Snrpe         |
| 0,007005 | -0,26496 | 0,621 | 0,733 | 1 4        | Hnrnpu        |
| 0,007113 | 0,307926 | 0,883 | 0,824 | 1 4        | Lax1          |
| 0,007764 | 0,371467 | 0,408 | 0,311 | 1 4        | Atm           |
| 0,007913 | -0,26374 | 0,359 | 0,469 | 1 4        | Hdac1         |
| 0,007939 | 0,27569  | 0,34  | 0,232 | 1 4        | Zscan26       |
| 0,007997 | -0,27094 | 0,524 | 0,669 | 1 4        | Syk           |
| 0,008409 | -0,36288 | 0,408 | 0,516 | 1 4        | Xist          |
| 0,008438 | 0,330345 | 0,738 | 0,648 | 1 4        | Phip          |
| 0,00853  | 0,276047 | 0,932 | 0,928 | 1 4        | Sf3b1         |
| 0,008577 | -0,26612 | 0,621 | 0,707 | 1 4        | Srsf1         |
| 0,008616 | -0,28057 | 0,272 | 0,39  | 1 4        | Tmem179b      |
| 0,009083 | -0,26634 | 0,078 | 0,175 | 1 4        | Pno1          |
| 0,009694 | 0,254885 | 0,447 | 0,339 | 1 4        | Pdcd10        |
| 0,009811 | -0,27754 | 0,146 | 0,252 | 1 4        | Med30         |
| 0,009849 | 0,26692  | 0,408 | 0,299 | 1 4        | Gmfg          |
| 3,7E-175 | 1,353254 | 0,783 | 0,022 | 4,6E-171 5 | Cdc20         |
| 1,9E-138 | 1,320754 | 0,717 | 0,026 | 2,3E-134 5 | Aspm          |
| 6,8E-117 | 1,254295 | 0,717 | 0,035 | 8,4E-113 5 | Cdkn3         |
| 2,84E-91 | 2,153762 | 0,95  | 0,112 | 3,52E-87 5 | Ccnb2         |
| 1,04E-87 | 1,442766 | 0,867 | 0,086 | 1,29E-83 5 | Cks1b         |
| 9,68E-84 | 0,703971 | 0,483 | 0,021 | 1,2E-79 5  | Kif20a        |
| 3,24E-80 | 0,559016 | 0,3   | 0,005 | 4,01E-76 5 | Pif1          |
| 4,28E-77 | 1,319443 | 0,7   | 0,059 | 5,29E-73 5 | Ccnb1         |
| 1,26E-76 | 1,44074  | 0,8   | 0,083 | 1,56E-72 5 | Cdca8         |
| 2,14E-76 | 1,12227  | 0,567 | 0,036 | 2,65E-72 5 | Nek2          |
| 1,3E-71  | 1,152452 | 0,617 | 0,048 | 1,61E-67 5 | Cep55         |
| 1,36E-70 | 0,754048 | 0,383 | 0,015 | 1,69E-66 5 | Kif2c         |
| 3,19E-69 | 1,667609 | 0,883 | 0,12  | 3,95E-65 5 | Cenpe         |
| 1,43E-68 | 1,696759 | 0,867 | 0,119 | 1,77E-64 5 | Tpx2          |
| 1,82E-68 | 1,009681 | 0,467 | 0,026 | 2,26E-64 5 | Plk1          |
| 1,3E-66  | 1,067909 | 0,533 | 0,037 | 1,61E-62 5 | Ckap2l        |
| 3,05E-64 | 1,493736 | 0,733 | 0,08  | 3,78E-60 5 | Ccna2         |
| 1,5E-59  | 1,076014 | 0,6   | 0,056 | 1,86E-55 5 | C330027C09Rik |
| 4,66E-59 | 1,755693 | 0,9   | 0,164 | 5,77E-55 5 | Cenpa         |
| 2,06E-56 | 0,823725 | 0,483 | 0,036 | 2,55E-52 5 | Knstrn        |
| 3,35E-55 | 0,98141  | 0,55  | 0,052 | 4,15E-51 5 | Dlgap5        |
| 1,19E-54 | 0,436321 | 0,267 | 0,008 | 1,47E-50 5 | Sapcd2        |
| 4,56E-52 | 1,242782 | 0,683 | 0,09  | 5,64E-48 5 | Cdca3         |
| 8,58E-50 | 1,248319 | 0,65  | 0,085 | 1,06E-45 5 | Kif23         |
| 6,43E-49 | 0,532953 | 0,283 | 0,012 | 7,96E-45 5 | Cdc25c        |
| 7,8E-49  | 2,059954 | 0,867 | 0,199 | 9,66E-45 5 | Cks2          |
| 4,15E-48 | 1,659385 | 0,783 | 0,145 | 5,14E-44 5 | Ube2c         |
| 9,03E-47 | 1,189978 | 0,75  | 0,12  | 1,12E-42 5 | Racgap1       |
| 4,93E-46 | 1,270106 | 0,583 | 0,073 | 6,1E-42 5  | Cenpf         |
| 1,76E-44 | 0,803662 | 0,483 | 0,048 | 2,18E-40 5 | Kif4          |
| 2,69E-43 | 2,135644 | 0,967 | 0,294 | 3,33E-39 5 | Mki67         |
| 4,85E-43 | 1,171251 | 0,733 | 0,129 | 6E-39 5    | Birc5         |
| 3,71E-42 | 0,768475 | 0,517 | 0,059 | 4,6E-38 5  | Bub1b         |

|          |          |       |       |          |   |               |
|----------|----------|-------|-------|----------|---|---------------|
| 5,2E-42  | 0,773028 | 0,483 | 0,052 | 6,43E-38 | 5 | Gpsm2         |
| 1,91E-41 | 2,21351  | 1     | 0,444 | 2,36E-37 | 5 | Hmgb2         |
| 2,01E-41 | 0,955505 | 0,5   | 0,057 | 2,49E-37 | 5 | Ckap2         |
| 1,61E-40 | 0,367607 | 0,283 | 0,016 | 1,99E-36 | 5 | Arhgap19      |
| 1,43E-39 | 0,355187 | 0,25  | 0,012 | 1,78E-35 | 5 | Gtse1         |
| 1,93E-39 | 0,367931 | 0,2   | 0,007 | 2,4E-35  | 5 | Fam64a        |
| 5,3E-39  | 1,233554 | 0,6   | 0,094 | 6,56E-35 | 5 | Hmmr          |
| 7,17E-35 | 0,306087 | 0,2   | 0,008 | 8,87E-31 | 5 | Tbc1d4        |
| 2,47E-34 | 1,812536 | 1     | 0,73  | 3,05E-30 | 5 | Hmgn2         |
| 2,53E-33 | 0,336572 | 0,233 | 0,013 | 3,13E-29 | 5 | Parpbp        |
| 7,92E-33 | 0,561951 | 0,367 | 0,037 | 9,8E-29  | 5 | Bub1          |
| 1,93E-32 | 1,583958 | 0,95  | 0,365 | 2,39E-28 | 5 | Stmn1         |
| 2,14E-30 | 0,987525 | 0,817 | 0,212 | 2,65E-26 | 5 | Ncapd2        |
| 1,92E-29 | 1,216682 | 0,867 | 0,28  | 2,37E-25 | 5 | Ube2s         |
| 3,95E-29 | 1,182075 | 0,9   | 0,319 | 4,89E-25 | 5 | H2afv         |
| 9,91E-29 | 0,836496 | 0,517 | 0,088 | 1,23E-24 | 5 | Dbf4          |
| 3,53E-28 | 0,605128 | 0,483 | 0,077 | 4,37E-24 | 5 | Hspa2         |
| 3,91E-28 | 1,518362 | 1     | 0,671 | 4,84E-24 | 5 | H2afz         |
| 6,38E-28 | 0,466543 | 0,267 | 0,023 | 7,9E-24  | 5 | Gas2l3        |
| 1,63E-27 | 0,603143 | 0,45  | 0,068 | 2,01E-23 | 5 | Cenpw         |
| 2,73E-27 | 0,44978  | 0,333 | 0,037 | 3,38E-23 | 5 | Ccrl1         |
| 4,07E-27 | 0,497878 | 0,267 | 0,024 | 5,04E-23 | 5 | 1190002F15Rik |
| 9,94E-27 | 0,6599   | 0,583 | 0,115 | 1,23E-22 | 5 | Ckap5         |
| 2,11E-26 | 0,708287 | 0,45  | 0,072 | 2,61E-22 | 5 | Nup37         |
| 3,31E-26 | 0,967137 | 0,767 | 0,236 | 4,09E-22 | 5 | 2700094K13Rik |
| 6,23E-26 | 1,047613 | 0,7   | 0,19  | 7,71E-22 | 5 | H2afx         |
| 8,78E-26 | 0,596242 | 0,35  | 0,044 | 1,09E-21 | 5 | Espl1         |
| 1,18E-25 | 0,787694 | 0,417 | 0,064 | 1,46E-21 | 5 | Spag5         |
| 1,4E-25  | 0,416738 | 0,3   | 0,032 | 1,74E-21 | 5 | Kif22         |
| 2,02E-25 | 1,39404  | 0,867 | 0,381 | 2,5E-21  | 5 | Rad21         |
| 7,37E-25 | 0,688273 | 0,433 | 0,07  | 9,13E-21 | 5 | Nusap1        |
| 1,09E-24 | 0,42361  | 0,217 | 0,017 | 1,35E-20 | 5 | Fam72a        |
| 1,12E-24 | 1,198187 | 0,95  | 0,443 | 1,39E-20 | 5 | Nucks1        |
| 5,42E-24 | 0,401448 | 0,283 | 0,03  | 6,71E-20 | 5 | Shcbp1        |
| 5,96E-23 | 0,620981 | 0,333 | 0,045 | 7,38E-19 | 5 | Kif18a        |
| 6,06E-23 | 1,544511 | 0,85  | 0,344 | 7,51E-19 | 5 | Tubb4b        |
| 1,46E-22 | 1,171186 | 0,85  | 0,341 | 1,8E-18  | 5 | Pafah1b3      |
| 4,7E-22  | -0,91768 | 1     | 1     | 5,82E-18 | 5 | H2-Aa         |
| 7,18E-22 | 0,509597 | 0,317 | 0,042 | 8,89E-18 | 5 | Sgol1         |
| 1,66E-21 | 0,552871 | 0,283 | 0,035 | 2,05E-17 | 5 | Ect2          |
| 1,99E-21 | 1,124904 | 0,983 | 0,864 | 2,46E-17 | 5 | Cd24a         |
| 7,02E-21 | 0,704201 | 0,55  | 0,129 | 8,69E-17 | 5 | Tacc3         |
| 7,41E-21 | 1,087235 | 0,983 | 0,791 | 9,17E-17 | 5 | Hmgb1         |
| 1,3E-20  | 0,561253 | 0,233 | 0,025 | 1,61E-16 | 5 | Troap         |
| 2,16E-20 | 0,831191 | 0,517 | 0,124 | 2,68E-16 | 5 | Nuf2          |
| 2,84E-20 | 1,192104 | 0,867 | 0,426 | 3,52E-16 | 5 | Anp32e        |
| 5,3E-20  | 0,962205 | 0,85  | 0,336 | 6,57E-16 | 5 | Polr2g        |
| 7,31E-20 | 0,969391 | 0,95  | 0,41  | 9,05E-16 | 5 | Gcsam         |
| 1,72E-19 | 1,292901 | 0,883 | 0,421 | 2,13E-15 | 5 | 8430410A17Rik |
| 3,63E-19 | 0,67531  | 0,4   | 0,076 | 4,5E-15  | 5 | Kif11         |

|          |          |       |       |          |   |               |
|----------|----------|-------|-------|----------|---|---------------|
| 7,58E-19 | 1,052299 | 0,967 | 0,572 | 9,38E-15 | 5 | Mbd2          |
| 1,92E-18 | 1,027192 | 0,917 | 0,434 | 2,38E-14 | 5 | Rgs13         |
| 2,21E-18 | 0,967015 | 0,683 | 0,24  | 2,74E-14 | 5 | Acsl5         |
| 2,69E-18 | 0,854199 | 1     | 0,942 | 3,33E-14 | 5 | Ptma          |
| 4,18E-18 | 0,872332 | 0,567 | 0,161 | 5,18E-14 | 5 | H1fx          |
| 1,45E-17 | 0,968225 | 0,85  | 0,373 | 1,79E-13 | 5 | Anxa2         |
| 5,45E-17 | 1,093599 | 0,9   | 0,439 | 6,75E-13 | 5 | Dck           |
| 7,82E-17 | 0,844324 | 0,45  | 0,111 | 9,68E-13 | 5 | Prc1          |
| 7,94E-17 | 0,901496 | 0,933 | 0,62  | 9,83E-13 | 5 | Ran           |
| 1,38E-16 | 0,948276 | 0,883 | 0,471 | 1,71E-12 | 5 | Lbr           |
| 1,43E-16 | 0,997863 | 0,65  | 0,229 | 1,78E-12 | 5 | Cdc14b        |
| 2,04E-16 | 0,712786 | 0,583 | 0,185 | 2,52E-12 | 5 | Amz2          |
| 4,13E-16 | 0,948824 | 0,983 | 0,789 | 5,11E-12 | 5 | Pou2af1       |
| 4,83E-16 | 0,909052 | 0,767 | 0,343 | 5,98E-12 | 5 | Smarca4       |
| 4,89E-16 | 0,627771 | 0,25  | 0,037 | 6,06E-12 | 5 | Ccdc18        |
| 8E-16    | 0,943829 | 1     | 0,655 | 9,9E-12  | 5 | Igj           |
| 1,23E-15 | -1,55053 | 0,867 | 0,975 | 1,52E-11 | 5 | Malat1        |
| 1,6E-15  | 0,766752 | 0,983 | 0,981 | 1,98E-11 | 5 | Hnrnpa2b1     |
| 1,96E-15 | 0,827245 | 0,983 | 0,733 | 2,43E-11 | 5 | Ywhae         |
| 2,09E-15 | 0,276753 | 0,3   | 0,051 | 2,58E-11 | 5 | Ddah2         |
| 2,11E-15 | 0,528968 | 0,433 | 0,108 | 2,62E-11 | 5 | Arhgap11a     |
| 2,48E-15 | 0,44209  | 0,2   | 0,025 | 3,07E-11 | 5 | Aurka         |
| 3,76E-15 | 0,63524  | 0,4   | 0,096 | 4,65E-11 | 5 | C230052I12Rik |
| 7,92E-15 | 0,592302 | 0,617 | 0,199 | 9,81E-11 | 5 | Lsm5          |
| 1,15E-14 | 0,839447 | 0,833 | 0,422 | 1,43E-10 | 5 | Glr3          |
| 1,94E-14 | 0,603744 | 0,333 | 0,07  | 2,41E-10 | 5 | Kif15         |
| 2,9E-14  | 0,768981 | 0,75  | 0,321 | 3,59E-10 | 5 | Dynlt3        |
| 3,07E-14 | 0,710604 | 1     | 0,965 | 3,8E-10  | 5 | Calm1         |
| 4,28E-14 | 0,884109 | 0,717 | 0,31  | 5,3E-10  | 5 | Hdgf          |
| 4,65E-14 | 0,777921 | 0,783 | 0,373 | 5,76E-10 | 5 | Calm3         |
| 5,18E-14 | 0,662342 | 0,267 | 0,048 | 6,41E-10 | 5 | Sgol2         |
| 5,39E-14 | 0,674643 | 0,417 | 0,109 | 6,67E-10 | 5 | Cdk1          |
| 6,72E-14 | -1,34776 | 0,533 | 0,832 | 8,31E-10 | 5 | Macf1         |
| 6,91E-14 | 0,667889 | 0,35  | 0,079 | 8,56E-10 | 5 | Lig4          |
| 7,24E-14 | 0,524278 | 0,367 | 0,086 | 8,97E-10 | 5 | G2e3          |
| 1,55E-13 | 0,857613 | 0,733 | 0,331 | 1,92E-09 | 5 | Trim59        |
| 1,67E-13 | 1,059099 | 0,533 | 0,186 | 2,07E-09 | 5 | Tuba1c        |
| 1,77E-13 | 0,57702  | 0,417 | 0,111 | 2,19E-09 | 5 | Incenp        |
| 2,23E-13 | 0,582689 | 0,367 | 0,089 | 2,75E-09 | 5 | Kif20b        |
| 2,77E-13 | 0,761887 | 0,717 | 0,308 | 3,43E-09 | 5 | Hp1bp3        |
| 3,56E-13 | 0,42254  | 0,3   | 0,06  | 4,4E-09  | 5 | Reln          |
| 4,33E-13 | 0,698918 | 1     | 0,999 | 5,36E-09 | 5 | Cfl1          |
| 5,1E-13  | 0,412546 | 0,317 | 0,068 | 6,31E-09 | 5 | Otub2         |
| 6,53E-13 | 0,929806 | 0,95  | 0,635 | 8,09E-09 | 5 | Top1          |
| 7,36E-13 | 0,781809 | 0,967 | 0,687 | 9,11E-09 | 5 | Txn1          |
| 7,66E-13 | 0,64979  | 0,6   | 0,221 | 9,48E-09 | 5 | Abl2          |
| 7,71E-13 | 0,512247 | 0,283 | 0,057 | 9,55E-09 | 5 | Mis18bp1      |
| 8,58E-13 | 0,419801 | 0,35  | 0,081 | 1,06E-08 | 5 | Hmgb3         |
| 1,02E-12 | 0,854518 | 0,917 | 0,626 | 1,26E-08 | 5 | Hmgn1         |
| 1,79E-12 | 0,637287 | 0,65  | 0,251 | 2,22E-08 | 5 | Nuggc         |

|          |          |       |       |          |   |               |
|----------|----------|-------|-------|----------|---|---------------|
| 1,9E-12  | 0,67848  | 0,667 | 0,263 | 2,35E-08 | 5 | Vpreb3        |
| 3,14E-12 | -0,93907 | 0,867 | 0,96  | 3,89E-08 | 5 | Cd22          |
| 3,29E-12 | 0,362396 | 0,25  | 0,047 | 4,08E-08 | 5 | Hist1h2bc     |
| 3,66E-12 | -1,07617 | 0,217 | 0,668 | 4,53E-08 | 5 | lfi30         |
| 4,05E-12 | 0,479674 | 0,25  | 0,048 | 5,02E-08 | 5 | Sord          |
| 5,33E-12 | 0,362379 | 0,317 | 0,072 | 6,6E-08  | 5 | Ccdc77        |
| 8,4E-12  | 0,450759 | 0,35  | 0,088 | 1,04E-07 | 5 | L3mbtl2       |
| 8,53E-12 | 0,341842 | 0,233 | 0,042 | 1,06E-07 | 5 | Ttk           |
| 9,15E-12 | 0,774036 | 0,7   | 0,334 | 1,13E-07 | 5 | Dap           |
| 1,13E-11 | 0,544032 | 0,6   | 0,216 | 1,4E-07  | 5 | 2810417H13Rik |
| 1,34E-11 | 0,356699 | 0,267 | 0,055 | 1,66E-07 | 5 | Cenpl         |
| 1,58E-11 | 0,633652 | 0,567 | 0,206 | 1,95E-07 | 5 | Mad2l1        |
| 1,68E-11 | 0,872959 | 0,867 | 0,574 | 2,08E-07 | 5 | Hn1           |
| 3,42E-11 | 0,68969  | 0,967 | 0,767 | 4,24E-07 | 5 | Gapdh         |
| 3,81E-11 | 0,27031  | 0,15  | 0,019 | 4,72E-07 | 5 | Kif14         |
| 3,85E-11 | 0,334739 | 0,267 | 0,057 | 4,76E-07 | 5 | Rnf26         |
| 5,2E-11  | -0,70437 | 0,967 | 0,993 | 6,44E-07 | 5 | Cd52          |
| 5,62E-11 | -1,22917 | 0,317 | 0,688 | 6,95E-07 | 5 | Gimap4        |
| 5,99E-11 | 0,629654 | 0,983 | 0,944 | 7,41E-07 | 5 | Eif4g2        |
| 6,35E-11 | 0,449049 | 0,4   | 0,118 | 7,86E-07 | 5 | Fam216a       |
| 7,22E-11 | 0,739609 | 0,533 | 0,207 | 8,94E-07 | 5 | Nde1          |
| 7,66E-11 | 0,712356 | 0,617 | 0,295 | 9,48E-07 | 5 | Vbp1          |
| 8,75E-11 | -0,45763 | 1     | 1     | 1,08E-06 | 5 | H2-Ab1        |
| 9,74E-11 | 0,532132 | 0,417 | 0,134 | 1,21E-06 | 5 | Odf2          |
| 1,14E-10 | 0,378024 | 0,267 | 0,059 | 1,41E-06 | 5 | Rgcc          |
| 1,23E-10 | 0,57073  | 0,417 | 0,134 | 1,53E-06 | 5 | Uap1          |
| 1,27E-10 | 0,298274 | 0,2   | 0,035 | 1,57E-06 | 5 | 4933404O12Rik |
| 1,3E-10  | -1,04846 | 0,45  | 0,804 | 1,61E-06 | 5 | Mycbp2        |
| 1,33E-10 | 0,529349 | 1     | 0,997 | 1,65E-06 | 5 | Actg1         |
| 1,55E-10 | 0,771348 | 0,867 | 0,566 | 1,92E-06 | 5 | Cyfip2        |
| 1,56E-10 | 0,642529 | 0,733 | 0,365 | 1,93E-06 | 5 | Taf9          |
| 1,78E-10 | 0,567677 | 0,667 | 0,287 | 2,2E-06  | 5 | Rassf6        |
| 1,93E-10 | 0,387536 | 0,3   | 0,076 | 2,39E-06 | 5 | Akap12        |
| 1,98E-10 | 0,411177 | 0,417 | 0,129 | 2,45E-06 | 5 | Ripk3         |
| 2,04E-10 | 0,870447 | 0,667 | 0,32  | 2,53E-06 | 5 | Ptms          |
| 2,7E-10  | 0,420226 | 0,267 | 0,062 | 3,34E-06 | 5 | Cdca2         |
| 2,72E-10 | 0,414387 | 0,483 | 0,168 | 3,37E-06 | 5 | Acyp1         |
| 2,75E-10 | -1,10935 | 0,233 | 0,615 | 3,41E-06 | 5 | Lmo2          |
| 3,14E-10 | -0,90233 | 0,483 | 0,763 | 3,89E-06 | 5 | Hvcn1         |
| 3,55E-10 | 0,542678 | 0,683 | 0,295 | 4,39E-06 | 5 | Rnf10         |
| 4,04E-10 | 0,489081 | 0,55  | 0,205 | 5,01E-06 | 5 | 4833439L19Rik |
| 4,15E-10 | 0,652867 | 0,783 | 0,422 | 5,14E-06 | 5 | Phf6          |
| 4,26E-10 | 0,64935  | 0,717 | 0,363 | 5,27E-06 | 5 | Dbi           |
| 4,51E-10 | 0,472026 | 0,4   | 0,129 | 5,58E-06 | 5 | S100a13       |
| 4,76E-10 | -0,84723 | 0,8   | 0,92  | 5,89E-06 | 5 | Ptpn6         |
| 6,07E-10 | -1,42628 | 0,1   | 0,512 | 7,52E-06 | 5 | Mndal         |
| 6,84E-10 | 0,629536 | 0,967 | 0,787 | 8,47E-06 | 5 | Atp5a1        |
| 7,12E-10 | 0,630179 | 0,767 | 0,392 | 8,82E-06 | 5 | Odc1          |
| 7,14E-10 | 0,741651 | 0,617 | 0,262 | 8,84E-06 | 5 | Top2a         |
| 7,71E-10 | -0,6347  | 1     | 0,988 | 9,54E-06 | 5 | Rpl38         |

|          |          |       |       |          |   |               |
|----------|----------|-------|-------|----------|---|---------------|
| 8,37E-10 | 0,478155 | 0,467 | 0,171 | 1,04E-05 | 5 | Ddx19a        |
| 8,51E-10 | 0,560146 | 0,6   | 0,266 | 1,05E-05 | 5 | Tuba1a        |
| 8,62E-10 | 0,720889 | 0,733 | 0,382 | 1,07E-05 | 5 | Cxcr4         |
| 9,23E-10 | 0,711541 | 0,933 | 0,736 | 1,14E-05 | 5 | Dynll1        |
| 1,02E-09 | 0,96682  | 0,567 | 0,236 | 1,27E-05 | 5 | Kpna2         |
| 1,04E-09 | 0,582137 | 0,983 | 0,911 | 1,29E-05 | 5 | Ppia          |
| 1,17E-09 | 0,343276 | 0,183 | 0,033 | 1,45E-05 | 5 | Adhfe1        |
| 1,24E-09 | -0,89915 | 0,317 | 0,69  | 1,53E-05 | 5 | Pisd-ps1      |
| 1,31E-09 | 0,439852 | 0,35  | 0,106 | 1,62E-05 | 5 | Csrp2         |
| 1,52E-09 | 0,671909 | 0,867 | 0,492 | 1,88E-05 | 5 | Aicda         |
| 1,62E-09 | 0,578243 | 0,583 | 0,263 | 2,01E-05 | 5 | Smagp         |
| 1,98E-09 | 0,283753 | 0,15  | 0,023 | 2,45E-05 | 5 | 1500015A07Rik |
| 2,09E-09 | 0,250167 | 0,217 | 0,045 | 2,59E-05 | 5 | Ubald2        |
| 2,19E-09 | 0,698678 | 0,833 | 0,576 | 2,71E-05 | 5 | Tcea1         |
| 2,26E-09 | 0,398719 | 0,3   | 0,081 | 2,8E-05  | 5 | Ccdc34        |
| 2,53E-09 | -0,4344  | 1     | 1     | 3,13E-05 | 5 | H2-Eb1        |
| 3,16E-09 | 0,61256  | 0,733 | 0,417 | 3,92E-05 | 5 | Mapre2        |
| 3,49E-09 | 0,436463 | 0,517 | 0,2   | 4,32E-05 | 5 | Pqlc3         |
| 3,58E-09 | 0,499576 | 0,7   | 0,342 | 4,43E-05 | 5 | Cox7a2        |
| 3,85E-09 | 0,413979 | 0,533 | 0,207 | 4,77E-05 | 5 | Rgs10         |
| 4,08E-09 | 0,311481 | 0,217 | 0,046 | 5,05E-05 | 5 | Ska2          |
| 4,45E-09 | -1,31641 | 0,183 | 0,539 | 5,51E-05 | 5 | Ly6d          |
| 4,88E-09 | -1,11249 | 0,6   | 0,836 | 6,04E-05 | 5 | Shisa5        |
| 5,29E-09 | 0,645299 | 0,533 | 0,238 | 6,55E-05 | 5 | Sft2d2        |
| 5,33E-09 | -0,89862 | 0,35  | 0,691 | 6,6E-05  | 5 | Scd1          |
| 5,41E-09 | 0,476156 | 1     | 0,992 | 6,7E-05  | 5 | Pabpc1        |
| 5,86E-09 | 0,503951 | 0,567 | 0,242 | 7,26E-05 | 5 | Plxnb2        |
| 5,98E-09 | 0,558174 | 0,683 | 0,351 | 7,4E-05  | 5 | Cwc15         |
| 5,99E-09 | 0,585716 | 0,683 | 0,346 | 7,42E-05 | 5 | Gtf2a2        |
| 6,02E-09 | 0,610978 | 0,85  | 0,517 | 7,45E-05 | 5 | Mtf2          |
| 6,06E-09 | 0,607459 | 0,983 | 0,809 | 7,5E-05  | 5 | Hnrnpa3       |
| 6,18E-09 | 0,516012 | 0,65  | 0,297 | 7,66E-05 | 5 | Rgs2          |
| 6,23E-09 | 0,37992  | 0,5   | 0,188 | 7,71E-05 | 5 | Ddx47         |
| 6,35E-09 | -0,36013 | 1     | 1     | 7,86E-05 | 5 | Cd74          |
| 8,18E-09 | 0,408218 | 0,3   | 0,086 | 0,000101 | 5 | Spc24         |
| 9,26E-09 | -0,86512 | 0,683 | 0,853 | 0,000115 | 5 | Pou2f2        |
| 9,68E-09 | 0,649578 | 0,567 | 0,254 | 0,00012  | 5 | Larp7         |
| 1,03E-08 | 0,592213 | 0,683 | 0,346 | 0,000127 | 5 | Sh3bgrl       |
| 1,05E-08 | 0,354927 | 0,383 | 0,127 | 0,00013  | 5 | Rabl5         |
| 1,06E-08 | 0,348266 | 0,2   | 0,042 | 0,000131 | 5 | Ccnf          |
| 1,21E-08 | 1,110576 | 0,75  | 0,528 | 0,00015  | 5 | Smc4          |
| 1,31E-08 | 0,358674 | 0,383 | 0,126 | 0,000162 | 5 | Nup107        |
| 1,43E-08 | 0,319258 | 0,333 | 0,1   | 0,000177 | 5 | Emp2          |
| 1,45E-08 | 0,336385 | 0,283 | 0,077 | 0,000179 | 5 | Ift80         |
| 2,17E-08 | -0,57728 | 1     | 0,998 | 0,000269 | 5 | Cd19          |
| 2,29E-08 | 0,493433 | 0,567 | 0,25  | 0,000284 | 5 | Nudt21        |
| 2,51E-08 | 0,523502 | 0,5   | 0,219 | 0,000311 | 5 | Rangap1       |
| 2,52E-08 | -1,31326 | 0,3   | 0,588 | 0,000312 | 5 | Cmah          |
| 2,7E-08  | 0,526022 | 0,633 | 0,306 | 0,000334 | 5 | Eaf2          |
| 2,71E-08 | 0,604777 | 0,65  | 0,369 | 0,000335 | 5 | Sdhd          |

|          |          |       |       |          |   |               |
|----------|----------|-------|-------|----------|---|---------------|
| 4,13E-08 | 0,916843 | 0,8   | 0,621 | 0,000511 | 5 | Calm2         |
| 4,17E-08 | 0,506045 | 0,983 | 0,778 | 0,000516 | 5 | Mzb1          |
| 4,34E-08 | 0,440579 | 0,55  | 0,251 | 0,000537 | 5 | Cdkn2aipnl    |
| 4,53E-08 | 0,495457 | 0,467 | 0,196 | 0,000561 | 5 | Eny2          |
| 4,72E-08 | 0,636197 | 0,867 | 0,679 | 0,000584 | 5 | Mtpn          |
| 5,03E-08 | 0,486685 | 0,917 | 0,634 | 0,000623 | 5 | Zfp706        |
| 5,05E-08 | 0,441892 | 0,467 | 0,191 | 0,000625 | 5 | Med10         |
| 5,1E-08  | 0,455896 | 1     | 0,989 | 0,000632 | 5 | Eif1          |
| 5,13E-08 | -0,89096 | 0,067 | 0,419 | 0,000634 | 5 | Capg          |
| 5,15E-08 | -0,56849 | 0,983 | 0,992 | 0,000638 | 5 | H2-Ob         |
| 5,57E-08 | 0,813167 | 0,7   | 0,442 | 0,000689 | 5 | Hipk3         |
| 5,9E-08  | 0,572942 | 0,933 | 0,815 | 0,00073  | 5 | Hsp90aa1      |
| 6,43E-08 | 0,376945 | 0,35  | 0,12  | 0,000795 | 5 | Msrbl1        |
| 6,51E-08 | 0,459127 | 0,417 | 0,164 | 0,000806 | 5 | Lmnb1         |
| 6,63E-08 | 0,544795 | 0,317 | 0,104 | 0,000821 | 5 | Ccdc104       |
| 6,84E-08 | -0,99821 | 0,267 | 0,582 | 0,000847 | 5 | Bank1         |
| 6,99E-08 | 0,471983 | 0,6   | 0,271 | 0,000866 | 5 | Lipc          |
| 7,08E-08 | 0,619562 | 0,717 | 0,429 | 0,000876 | 5 | Cdk2ap2       |
| 7,33E-08 | -0,56827 | 0,967 | 0,995 | 0,000907 | 5 | Rps21         |
| 7,52E-08 | 0,469083 | 0,6   | 0,28  | 0,000931 | 5 | Oat           |
| 8,3E-08  | -0,56612 | 0,967 | 0,98  | 0,001028 | 5 | Rpl37a        |
| 8,36E-08 | 0,259887 | 0,25  | 0,067 | 0,001035 | 5 | Cenpn         |
| 8,82E-08 | -1,07051 | 0,133 | 0,477 | 0,001092 | 5 | Pml           |
| 9,42E-08 | -0,78241 | 0,767 | 0,893 | 0,001166 | 5 | Zfp3611       |
| 1,02E-07 | 0,547118 | 0,65  | 0,353 | 0,001264 | 5 | Ube2h         |
| 1,06E-07 | -1,17553 | 0,167 | 0,487 | 0,001313 | 5 | Ifi203        |
| 1,15E-07 | 0,359138 | 0,4   | 0,148 | 0,001427 | 5 | Pih1d1        |
| 1,15E-07 | 0,256285 | 0,15  | 0,028 | 0,001429 | 5 | Dnase1        |
| 1,21E-07 | 0,431822 | 0,583 | 0,279 | 0,001493 | 5 | Ddx39         |
| 1,34E-07 | 0,330783 | 0,267 | 0,078 | 0,00166  | 5 | Ap3s1         |
| 1,38E-07 | 0,603825 | 0,767 | 0,461 | 0,001711 | 5 | Mapre1        |
| 1,45E-07 | 0,557888 | 0,85  | 0,571 | 0,001793 | 5 | Ppp2ca        |
| 1,67E-07 | 0,491519 | 0,683 | 0,373 | 0,002063 | 5 | Uqcrfs1       |
| 1,79E-07 | 0,305013 | 0,4   | 0,148 | 0,002211 | 5 | Rpa3          |
| 1,82E-07 | 0,510137 | 0,517 | 0,238 | 0,002249 | 5 | Med30         |
| 1,85E-07 | 0,370809 | 0,433 | 0,172 | 0,002287 | 5 | Hmgcs1        |
| 2,14E-07 | 0,365285 | 0,283 | 0,088 | 0,002647 | 5 | Aurkb         |
| 2,2E-07  | 0,557476 | 0,867 | 0,689 | 0,002718 | 5 | Hnrnpk        |
| 2,36E-07 | -0,82732 | 0,55  | 0,773 | 0,002916 | 5 | Btla          |
| 2,97E-07 | -1,06082 | 0,35  | 0,639 | 0,003682 | 5 | Fcer2a        |
| 3,04E-07 | -0,80842 | 0,033 | 0,354 | 0,003757 | 5 | Map3k1        |
| 3,14E-07 | -0,36902 | 1     | 0,999 | 0,003883 | 5 | Rpl27a        |
| 3,28E-07 | 0,494677 | 0,983 | 0,783 | 0,004065 | 5 | Srsf3         |
| 3,32E-07 | 0,521992 | 0,4   | 0,16  | 0,004114 | 5 | Ncbp2         |
| 3,33E-07 | -0,90821 | 0,017 | 0,334 | 0,004127 | 5 | Bcl2          |
| 3,36E-07 | 0,634532 | 0,75  | 0,479 | 0,004165 | 5 | Wbp2          |
| 3,37E-07 | 0,296413 | 0,233 | 0,064 | 0,004177 | 5 | Casc5         |
| 3,5E-07  | 0,341244 | 0,333 | 0,117 | 0,004329 | 5 | Myef2         |
| 3,84E-07 | -0,85892 | 0,833 | 0,946 | 0,004756 | 5 | A630089N07Rik |
| 4,12E-07 | -1,16184 | 0,117 | 0,428 | 0,005104 | 5 | Sell          |

|          |          |       |       |          |   |          |
|----------|----------|-------|-------|----------|---|----------|
| 4,57E-07 | 0,3127   | 0,35  | 0,124 | 0,005655 | 5 | Gnb4     |
| 4,83E-07 | -0,73507 | 0,35  | 0,627 | 0,005979 | 5 | Tbc1d10c |
| 5,43E-07 | -0,70542 | 0,467 | 0,689 | 0,006717 | 5 | Srrm2    |
| 5,46E-07 | 0,405495 | 0,633 | 0,325 | 0,006759 | 5 | Qars     |
| 5,61E-07 | 0,566924 | 0,883 | 0,722 | 0,006949 | 5 | Atp5g3   |
| 5,63E-07 | 0,32616  | 0,4   | 0,156 | 0,006972 | 5 | Hmgcr    |
| 5,71E-07 | -0,66004 | 0,567 | 0,763 | 0,007068 | 5 | Gas5     |
| 5,83E-07 | 0,450661 | 0,6   | 0,314 | 0,007219 | 5 | Cpsf2    |
| 5,95E-07 | 0,27735  | 0,2   | 0,052 | 0,007363 | 5 | Prr11    |
| 6,34E-07 | 0,51706  | 0,45  | 0,208 | 0,007843 | 5 | Cul4b    |
| 6,47E-07 | 0,36997  | 0,45  | 0,191 | 0,00801  | 5 | Suv39h1  |
| 6,54E-07 | -0,86092 | 0,633 | 0,799 | 0,008091 | 5 | Faim3    |
| 6,55E-07 | -0,57794 | 0,867 | 0,937 | 0,008108 | 5 | Rpl36    |
| 6,93E-07 | -0,97644 | 0,55  | 0,736 | 0,008585 | 5 | Ly6a     |
| 7,02E-07 | 0,385776 | 0,483 | 0,214 | 0,008695 | 5 | Snx10    |
| 7,8E-07  | 0,325821 | 0,467 | 0,198 | 0,009662 | 5 | Lsm3     |
| 7,81E-07 | -0,78005 | 0,567 | 0,75  | 0,009672 | 5 | Bcl11a   |
| 7,96E-07 | -0,88034 | 0,05  | 0,365 | 0,00986  | 5 | Gm1966   |
| 8,03E-07 | -0,45309 | 0,967 | 0,998 | 0,009939 | 5 | Cd37     |
| 9,59E-07 | 0,251345 | 0,2   | 0,053 | 0,011868 | 5 | Phf7     |
| 9,72E-07 | 0,499234 | 0,367 | 0,147 | 0,012037 | 5 | Reep4    |
| 1E-06    | 0,284585 | 0,233 | 0,068 | 0,012426 | 5 | Cenpv    |
| 1,01E-06 | 0,33692  | 0,383 | 0,152 | 0,01245  | 5 | Tceanc2  |
| 1,03E-06 | 0,475933 | 0,817 | 0,532 | 0,0128   | 5 | Ppp4r2   |
| 1,09E-06 | 0,382187 | 0,367 | 0,145 | 0,013444 | 5 | Fopnl    |
| 1,1E-06  | 0,637421 | 0,667 | 0,426 | 0,013628 | 5 | Ube2j1   |
| 1,14E-06 | 0,357352 | 0,433 | 0,183 | 0,01407  | 5 | Nrbf2    |
| 1,25E-06 | -0,33832 | 1     | 1     | 0,015495 | 5 | mtNd2    |
| 1,28E-06 | -0,95185 | 0,117 | 0,417 | 0,015834 | 5 | Klf2     |
| 1,29E-06 | 0,355981 | 0,433 | 0,187 | 0,015913 | 5 | Nubp2    |
| 1,32E-06 | -0,46388 | 0,95  | 0,983 | 0,01636  | 5 | Rpl22    |
| 1,4E-06  | 0,313312 | 0,3   | 0,105 | 0,017278 | 5 | Blvrb    |
| 1,45E-06 | 0,780937 | 0,917 | 0,788 | 0,017971 | 5 | Tubb5    |
| 1,47E-06 | 0,489149 | 0,683 | 0,409 | 0,018246 | 5 | Rbm38    |
| 1,53E-06 | 0,432274 | 0,717 | 0,402 | 0,018912 | 5 | Slc25a4  |
| 1,68E-06 | 0,560146 | 0,85  | 0,713 | 0,020801 | 5 | Gpx1     |
| 1,69E-06 | 0,384941 | 0,483 | 0,219 | 0,020928 | 5 | Gadd45b  |
| 1,71E-06 | -0,75055 | 0,05  | 0,343 | 0,021119 | 5 | S100a10  |
| 1,75E-06 | 0,488077 | 0,7   | 0,437 | 0,021683 | 5 | Azin1    |
| 1,76E-06 | 0,420955 | 0,583 | 0,295 | 0,021747 | 5 | Dstn     |
| 1,76E-06 | 0,427204 | 0,767 | 0,467 | 0,021833 | 5 | Ywhah    |
| 1,77E-06 | 0,39246  | 0,633 | 0,32  | 0,021882 | 5 | Stap1    |
| 1,86E-06 | 0,51478  | 0,95  | 0,764 | 0,022971 | 5 | Atp5b    |
| 1,9E-06  | 0,669782 | 0,583 | 0,33  | 0,023477 | 5 | Fundc2   |
| 2,17E-06 | 0,44395  | 0,5   | 0,247 | 0,026921 | 5 | Asf1b    |
| 2,18E-06 | 0,451658 | 0,667 | 0,394 | 0,027002 | 5 | Fam107b  |
| 2,43E-06 | 0,421056 | 0,983 | 0,983 | 0,030102 | 5 | Ucp2     |
| 2,44E-06 | 0,348671 | 0,533 | 0,256 | 0,030216 | 5 | Fam96a   |
| 2,51E-06 | -0,90579 | 0,583 | 0,761 | 0,031134 | 5 | Il2rg    |
| 2,52E-06 | -0,81098 | 0,183 | 0,493 | 0,031211 | 5 | Abca1    |



|          |          |       |       |          |   |          |
|----------|----------|-------|-------|----------|---|----------|
| 2,53E-06 | 0,414824 | 0,8   | 0,504 | 0,031281 | 5 | Shfm1    |
| 2,56E-06 | 0,492839 | 0,817 | 0,635 | 0,031649 | 5 | Ywhaq    |
| 2,57E-06 | 0,420096 | 0,783 | 0,479 | 0,03182  | 5 | Ubl5     |
| 2,71E-06 | 0,275185 | 0,283 | 0,097 | 0,033603 | 5 | Myl4     |
| 2,74E-06 | 0,392798 | 0,4   | 0,172 | 0,033936 | 5 | Mzt1     |
| 2,9E-06  | 0,418835 | 0,817 | 0,571 | 0,035958 | 5 | Oaz1     |
| 2,94E-06 | 0,390044 | 0,5   | 0,242 | 0,036367 | 5 | Psm6     |
| 2,95E-06 | -0,70535 | 0,967 | 0,993 | 0,036492 | 5 | Kcnq1ot1 |
| 2,98E-06 | 0,620439 | 0,833 | 0,591 | 0,036915 | 5 | Hnrnpa0  |
| 2,99E-06 | 0,459003 | 0,917 | 0,682 | 0,037045 | 5 | Arpc5l   |
| 3E-06    | 0,356779 | 0,5   | 0,231 | 0,037182 | 5 | Sh2b2    |
| 3,13E-06 | 0,504395 | 0,517 | 0,272 | 0,038688 | 5 | Fgfr1op  |
| 3,17E-06 | -0,80765 | 0,133 | 0,432 | 0,039268 | 5 | Sub1     |
| 3,17E-06 | 0,259499 | 0,283 | 0,097 | 0,039306 | 5 | Yipf4    |
| 3,22E-06 | 0,383942 | 1     | 0,917 | 0,039892 | 5 | Rbm3     |
| 3,36E-06 | 0,367425 | 0,55  | 0,276 | 0,041574 | 5 | Nup50    |
| 3,44E-06 | 0,440506 | 0,667 | 0,379 | 0,042606 | 5 | Lpp      |
| 3,46E-06 | 0,269906 | 0,217 | 0,064 | 0,042804 | 5 | Pipox    |
| 3,49E-06 | 0,323873 | 0,35  | 0,141 | 0,043186 | 5 | Ccnh     |
| 3,71E-06 | 0,345875 | 0,3   | 0,111 | 0,045917 | 5 | Man1b1   |
| 3,8E-06  | -0,33387 | 1     | 1     | 0,047065 | 5 | Rpl17    |
| 3,8E-06  | 0,301913 | 0,4   | 0,168 | 0,047096 | 5 | Snrnp25  |
| 3,95E-06 | 0,52202  | 0,817 | 0,611 | 0,048912 | 5 | Cct2     |
| 3,98E-06 | 0,49149  | 0,933 | 0,778 | 0,049319 | 5 | Clic1    |
| 4,03E-06 | 0,453453 | 0,85  | 0,577 | 0,049844 | 5 | Ddx6     |
| 4,23E-06 | -0,59136 | 0,517 | 0,706 | 0,052335 | 5 | Ctsh     |
| 4,24E-06 | 0,335596 | 0,367 | 0,154 | 0,052497 | 5 | Rhno1    |
| 4,29E-06 | 0,393496 | 0,383 | 0,162 | 0,053165 | 5 | Cpne5    |
| 4,38E-06 | 0,475821 | 0,65  | 0,359 | 0,054245 | 5 | Tmem64   |
| 4,57E-06 | 0,320252 | 0,433 | 0,197 | 0,056545 | 5 | Snrpa1   |
| 4,74E-06 | -0,3548  | 1     | 0,999 | 0,058727 | 5 | Rpl13a   |
| 4,83E-06 | 0,280038 | 0,3   | 0,108 | 0,059754 | 5 | Ncaph    |
| 4,85E-06 | 0,373409 | 0,767 | 0,455 | 0,060024 | 5 | Eif3l    |
| 4,85E-06 | 0,277269 | 0,4   | 0,168 | 0,06009  | 5 | Pycr2    |
| 4,98E-06 | 0,347417 | 0,55  | 0,283 | 0,061691 | 5 | Aimp1    |
| 5E-06    | -0,81776 | 0,233 | 0,512 | 0,061853 | 5 | Cd83     |
| 5,04E-06 | 0,341273 | 0,333 | 0,131 | 0,062343 | 5 | Slc43a2  |
| 5,15E-06 | 0,341353 | 0,433 | 0,19  | 0,063801 | 5 | Gng12    |
| 5,22E-06 | -0,56818 | 0,65  | 0,838 | 0,064644 | 5 | Sipa1    |
| 5,49E-06 | -0,77589 | 0,433 | 0,645 | 0,067966 | 5 | Lbh      |
| 5,91E-06 | 0,47378  | 0,683 | 0,45  | 0,073129 | 5 | Fkbp8    |
| 5,97E-06 | 0,477684 | 0,383 | 0,177 | 0,07393  | 5 | Fam103a1 |
| 6,36E-06 | -0,7812  | 0,133 | 0,407 | 0,07868  | 5 | B3gnt5   |
| 6,45E-06 | 0,488307 | 0,75  | 0,507 | 0,079818 | 5 | Lsm14a   |
| 6,74E-06 | 0,455814 | 0,783 | 0,538 | 0,083404 | 5 | Paip2    |
| 6,77E-06 | 0,505284 | 0,633 | 0,38  | 0,083803 | 5 | Metap2   |
| 6,93E-06 | 0,510518 | 0,933 | 0,779 | 0,085811 | 5 | Anp32b   |
| 7,19E-06 | 0,372939 | 0,6   | 0,321 | 0,089019 | 5 | Osbp19   |
| 7,2E-06  | -0,67138 | 0,35  | 0,636 | 0,089158 | 5 | Ciita    |
| 7,35E-06 | 0,391645 | 0,517 | 0,257 | 0,091011 | 5 | Cyb5b    |

|          |          |       |       |          |   |          |
|----------|----------|-------|-------|----------|---|----------|
| 7,44E-06 | 0,475098 | 0,7   | 0,441 | 0,092108 | 5 | Csnk2b   |
| 7,49E-06 | -0,57634 | 0,333 | 0,575 | 0,09269  | 5 | Napsa    |
| 7,54E-06 | 0,437037 | 0,733 | 0,436 | 0,09337  | 5 | Bcl6     |
| 7,61E-06 | 0,350902 | 0,517 | 0,256 | 0,094186 | 5 | Ssr3     |
| 7,94E-06 | 0,278972 | 0,367 | 0,151 | 0,098274 | 5 | Prmt5    |
| 8,26E-06 | 0,554213 | 0,683 | 0,438 | 0,102253 | 5 | Tmed5    |
| 8,36E-06 | -0,56777 | 0,2   | 0,483 | 0,103509 | 5 | Acap1    |
| 8,47E-06 | 0,361379 | 0,55  | 0,282 | 0,104894 | 5 | Hsbp1    |
| 8,51E-06 | 0,405973 | 0,867 | 0,583 | 0,105301 | 5 | Zfp207   |
| 8,85E-06 | 0,448844 | 0,75  | 0,48  | 0,109601 | 5 | Cbx3     |
| 9,05E-06 | 0,267178 | 0,367 | 0,149 | 0,112063 | 5 | Smco4    |
| 9,34E-06 | 0,66208  | 0,717 | 0,534 | 0,115625 | 5 | Apobec1  |
| 9,35E-06 | 0,333756 | 0,25  | 0,086 | 0,11581  | 5 | Ncapg    |
| 9,77E-06 | 0,442285 | 0,45  | 0,227 | 0,120969 | 5 | Atpif1   |
| 1E-05    | 0,427131 | 0,883 | 0,674 | 0,123966 | 5 | Adrbk1   |
| 1,01E-05 | 0,507216 | 0,683 | 0,417 | 0,12482  | 5 | Spcs1    |
| 1,02E-05 | 0,326581 | 0,433 | 0,198 | 0,126149 | 5 | Rars     |
| 1,02E-05 | -0,36332 | 1     | 0,999 | 0,126854 | 5 | Rps24    |
| 1,04E-05 | 0,384137 | 0,517 | 0,269 | 0,128788 | 5 | Mrpl33   |
| 1,05E-05 | 0,264588 | 0,317 | 0,121 | 0,129627 | 5 | Dzip3    |
| 1,05E-05 | 0,401448 | 0,517 | 0,27  | 0,129834 | 5 | Swi5     |
| 1,05E-05 | -0,60507 | 0,117 | 0,396 | 0,13037  | 5 | Chd7     |
| 1,06E-05 | 0,430044 | 0,667 | 0,381 | 0,130619 | 5 | Pnp      |
| 1,06E-05 | -0,75583 | 0,133 | 0,401 | 0,130678 | 5 | Snn      |
| 1,06E-05 | 0,428717 | 0,767 | 0,517 | 0,131184 | 5 | Tceb2    |
| 1,08E-05 | 0,486096 | 0,933 | 0,901 | 0,133958 | 5 | Ywhaz    |
| 1,1E-05  | -0,77108 | 0,2   | 0,491 | 0,136148 | 5 | Dock10   |
| 1,11E-05 | -0,76387 | 0,917 | 0,972 | 0,137282 | 5 | Gm17821  |
| 1,14E-05 | 0,250833 | 0,233 | 0,077 | 0,140985 | 5 | Lrwd1    |
| 1,18E-05 | 0,389244 | 0,45  | 0,218 | 0,145926 | 5 | Anapc1   |
| 1,22E-05 | 0,469871 | 0,85  | 0,623 | 0,150494 | 5 | Pold4    |
| 1,22E-05 | 0,415254 | 0,417 | 0,195 | 0,150704 | 5 | Zadh2    |
| 1,23E-05 | 0,426591 | 0,583 | 0,332 | 0,152857 | 5 | Ndufb3   |
| 1,25E-05 | 0,384649 | 0,883 | 0,727 | 0,155334 | 5 | Sfpq     |
| 1,26E-05 | 0,32836  | 0,317 | 0,128 | 0,1561   | 5 | Cenpc1   |
| 1,31E-05 | 0,388038 | 0,517 | 0,262 | 0,162743 | 5 | Klf6     |
| 1,32E-05 | 0,466438 | 0,367 | 0,168 | 0,163198 | 5 | Hmgn5    |
| 1,33E-05 | 0,372834 | 0,5   | 0,256 | 0,16414  | 5 | Uchl3    |
| 1,34E-05 | 0,538598 | 0,45  | 0,228 | 0,166418 | 5 | Atp6v1a  |
| 1,38E-05 | 0,464723 | 0,65  | 0,413 | 0,17122  | 5 | Psbm3    |
| 1,4E-05  | 0,370422 | 0,333 | 0,142 | 0,173149 | 5 | Slc41a2  |
| 1,42E-05 | 0,49792  | 0,367 | 0,166 | 0,175391 | 5 | Ints9    |
| 1,47E-05 | -0,61851 | 0,733 | 0,86  | 0,181523 | 5 | D4Wsu53e |
| 1,49E-05 | 0,384013 | 0,967 | 0,834 | 0,183983 | 5 | Chchd2   |
| 1,56E-05 | 0,271034 | 0,317 | 0,124 | 0,193628 | 5 | Hjurp    |
| 1,57E-05 | 0,526979 | 0,717 | 0,486 | 0,194014 | 5 | Tmpo     |
| 1,62E-05 | 0,351237 | 0,767 | 0,479 | 0,2009   | 5 | Minos1   |
| 1,63E-05 | -0,83684 | 0,25  | 0,491 | 0,20174  | 5 | Fam65b   |
| 1,64E-05 | 0,413076 | 0,5   | 0,266 | 0,202493 | 5 | Psmc1    |
| 1,69E-05 | 0,441461 | 0,617 | 0,379 | 0,208862 | 5 | eGFP     |

|          |          |       |       |          |   |               |
|----------|----------|-------|-------|----------|---|---------------|
| 1,69E-05 | 0,288616 | 0,283 | 0,106 | 0,209174 | 5 | 5830416P10Rik |
| 1,78E-05 | 0,264628 | 0,25  | 0,089 | 0,220977 | 5 | Asrgl1        |
| 1,79E-05 | 0,41101  | 0,783 | 0,543 | 0,221146 | 5 | Atp5j         |
| 1,79E-05 | 0,402605 | 0,8   | 0,521 | 0,221433 | 5 | Ewsr1         |
| 1,79E-05 | 0,412439 | 0,95  | 0,784 | 0,221729 | 5 | Slc25a5       |
| 1,84E-05 | 0,436419 | 0,867 | 0,67  | 0,227936 | 5 | Purb          |
| 1,95E-05 | 0,400336 | 0,433 | 0,206 | 0,241527 | 5 | Rrm1          |
| 1,99E-05 | 0,300071 | 0,35  | 0,148 | 0,246542 | 5 | Ssna1         |
| 2E-05    | 0,453403 | 0,667 | 0,405 | 0,247809 | 5 | Idh3g         |
| 2,02E-05 | -0,66169 | 0,417 | 0,629 | 0,250288 | 5 | Snx2          |
| 2,06E-05 | 0,406287 | 0,517 | 0,273 | 0,255198 | 5 | Hmgn3         |
| 2,07E-05 | 0,425165 | 0,933 | 0,772 | 0,256671 | 5 | Srsf2         |
| 2,14E-05 | 0,416838 | 0,783 | 0,545 | 0,264447 | 5 | Snrpe         |
| 2,15E-05 | 0,29991  | 0,5   | 0,248 | 0,265683 | 5 | Aurkaip1      |
| 2,33E-05 | 0,327791 | 0,483 | 0,246 | 0,288055 | 5 | Mbtd1         |
| 2,34E-05 | 0,40426  | 0,467 | 0,239 | 0,290089 | 5 | Mprip         |
| 2,37E-05 | 0,318708 | 0,25  | 0,089 | 0,293288 | 5 | Hccs          |
| 2,48E-05 | 0,549294 | 0,667 | 0,43  | 0,307399 | 5 | Psmd14        |
| 2,56E-05 | 0,48251  | 0,883 | 0,657 | 0,316509 | 5 | Prdx1         |
| 2,62E-05 | 0,286574 | 0,417 | 0,195 | 0,323845 | 5 | Ngdn          |
| 2,67E-05 | 0,347284 | 0,533 | 0,298 | 0,330392 | 5 | Tceb1         |
| 2,74E-05 | 0,491755 | 0,767 | 0,505 | 0,338702 | 5 | Cox5b         |
| 2,89E-05 | -0,70789 | 0,283 | 0,521 | 0,357947 | 5 | Itm2b         |
| 2,9E-05  | 0,443838 | 0,733 | 0,47  | 0,359223 | 5 | Hpse          |
| 2,93E-05 | 0,384606 | 0,5   | 0,273 | 0,362147 | 5 | Ahcy          |
| 2,93E-05 | 0,255952 | 0,133 | 0,033 | 0,3628   | 5 | Anln          |
| 3,03E-05 | 0,32233  | 0,267 | 0,102 | 0,375055 | 5 | Bpgm          |
| 3,24E-05 | 0,39545  | 0,4   | 0,191 | 0,401169 | 5 | Rrm2b         |
| 3,36E-05 | 0,330606 | 0,483 | 0,253 | 0,416297 | 5 | Ndufs8        |
| 3,43E-05 | 0,330019 | 0,55  | 0,293 | 0,424295 | 5 | Cetn3         |
| 3,48E-05 | 0,321673 | 0,533 | 0,287 | 0,430868 | 5 | Dgkz          |
| 3,49E-05 | 0,440293 | 0,683 | 0,435 | 0,432221 | 5 | Cmpk1         |
| 3,51E-05 | 0,409311 | 0,75  | 0,502 | 0,433921 | 5 | Erh           |
| 3,64E-05 | 0,401019 | 0,95  | 0,808 | 0,450329 | 5 | Arpc5         |
| 3,64E-05 | -0,3146  | 1     | 0,998 | 0,450791 | 5 | Rps29         |
| 3,67E-05 | 0,298556 | 0,4   | 0,184 | 0,454399 | 5 | Bfsp2         |
| 3,74E-05 | 0,289239 | 0,317 | 0,135 | 0,463475 | 5 | Bak1          |
| 3,74E-05 | 0,364359 | 0,417 | 0,201 | 0,463593 | 5 | Cyp51         |
| 3,76E-05 | -0,76278 | 0,65  | 0,805 | 0,465072 | 5 | Grk4          |
| 3,76E-05 | -0,5262  | 0,117 | 0,375 | 0,465438 | 5 | Mllt6         |
| 3,82E-05 | 0,350125 | 0,517 | 0,264 | 0,472988 | 5 | Ppp1r2        |
| 3,87E-05 | 0,31481  | 0,517 | 0,265 | 0,478795 | 5 | Lypla1        |
| 3,87E-05 | -0,64941 | 0,283 | 0,542 | 0,479193 | 5 | Gimap3        |
| 4,24E-05 | -0,57124 | 0     | 0,223 | 0,524952 | 5 | Arhgef18      |
| 4,32E-05 | 0,356312 | 1     | 0,981 | 0,534578 | 5 | Laptm5        |
| 4,35E-05 | 0,307074 | 0,45  | 0,222 | 0,538016 | 5 | Rbm7          |
| 4,42E-05 | 0,43866  | 0,55  | 0,323 | 0,547002 | 5 | Sar1b         |
| 4,42E-05 | -0,56078 | 0,2   | 0,471 | 0,547495 | 5 | A130077B15Rik |
| 4,44E-05 | 0,345443 | 0,617 | 0,349 | 0,549949 | 5 | Pkig          |
| 4,56E-05 | 0,38119  | 0,817 | 0,563 | 0,565005 | 5 | Hnrnpd        |

|          |          |       |       |          |   |               |
|----------|----------|-------|-------|----------|---|---------------|
| 4,57E-05 | -0,60219 | 0,6   | 0,751 | 0,566109 | 5 | Ltb           |
| 4,59E-05 | 0,306649 | 0,483 | 0,251 | 0,568097 | 5 | Exosc8        |
| 4,64E-05 | -0,73201 | 0,317 | 0,554 | 0,574369 | 5 | Cr2           |
| 4,66E-05 | 0,400524 | 0,883 | 0,654 | 0,576685 | 5 | Cox6c         |
| 4,76E-05 | 0,435469 | 0,517 | 0,28  | 0,589129 | 5 | Xrcc1         |
| 4,99E-05 | 0,285303 | 0,267 | 0,105 | 0,618224 | 5 | Carhsp1       |
| 5E-05    | 0,323446 | 0,75  | 0,487 | 0,619189 | 5 | Wdr92         |
| 5,07E-05 | 0,295153 | 0,45  | 0,225 | 0,62815  | 5 | Magoh         |
| 5,13E-05 | 0,364759 | 0,467 | 0,244 | 0,63509  | 5 | Psat1         |
| 5,33E-05 | 0,265933 | 0,5   | 0,256 | 0,659352 | 5 | Gnai3         |
| 5,39E-05 | 0,330696 | 0,683 | 0,416 | 0,666979 | 5 | Tcp1          |
| 5,42E-05 | 0,34427  | 0,45  | 0,237 | 0,671082 | 5 | Eif1b         |
| 5,42E-05 | 0,38642  | 0,983 | 0,931 | 0,671352 | 5 | H3f3b         |
| 6,05E-05 | 0,385569 | 0,6   | 0,343 | 0,749288 | 5 | Cep110        |
| 6,12E-05 | 0,284681 | 0,3   | 0,126 | 0,758203 | 5 | Tex30         |
| 6,27E-05 | 0,304587 | 0,15  | 0,042 | 0,77603  | 5 | Ehf           |
| 6,28E-05 | 0,426161 | 0,833 | 0,621 | 0,777027 | 5 | Atp5l         |
| 6,43E-05 | 0,255771 | 0,25  | 0,094 | 0,796555 | 5 | Phf19         |
| 6,52E-05 | 0,327739 | 0,383 | 0,184 | 0,807271 | 5 | Wsb2          |
| 6,88E-05 | -0,55483 | 0,417 | 0,623 | 0,852296 | 5 | H2-Oa         |
| 7,19E-05 | 0,30441  | 0,533 | 0,295 | 0,890202 | 5 | Ddb1          |
| 7,29E-05 | 0,353966 | 0,867 | 0,676 | 0,902476 | 5 | Cnp           |
| 7,4E-05  | -0,60189 | 0,05  | 0,276 | 0,916057 | 5 | Serp1b1a      |
| 7,49E-05 | 0,399992 | 0,75  | 0,543 | 0,927846 | 5 | Psmb4         |
| 7,56E-05 | 0,468407 | 0,667 | 0,426 | 0,93574  | 5 | Dynlrb1       |
| 7,62E-05 | 0,419983 | 0,8   | 0,555 | 0,942991 | 5 | Psmb7         |
| 7,71E-05 | 0,439437 | 0,817 | 0,644 | 0,954496 | 5 | Cox4i1        |
| 7,75E-05 | -0,54047 | 0,317 | 0,538 | 0,959843 | 5 | Wdfy4         |
| 7,84E-05 | -0,67941 | 0,217 | 0,432 | 0,97108  | 5 | Ncf1          |
| 7,86E-05 | 0,65942  | 0,833 | 0,69  | 0,973318 | 5 | Cpne8         |
| 8,11E-05 | 0,327024 | 0,25  | 0,098 | 1        | 5 | Nudcd2        |
| 8,16E-05 | 0,414229 | 0,683 | 0,435 | 1        | 5 | G3bp1         |
| 8,17E-05 | -0,48499 | 0     | 0,209 | 1        | 5 | Ccr6          |
| 8,23E-05 | -0,50232 | 0,417 | 0,689 | 1        | 5 | Swap70        |
| 8,23E-05 | 0,251345 | 0,167 | 0,051 | 1        | 5 | Spdl1         |
| 8,36E-05 | 0,348211 | 0,317 | 0,141 | 1        | 5 | Nol8          |
| 8,54E-05 | 0,30134  | 0,45  | 0,232 | 1        | 5 | Sptssa        |
| 8,56E-05 | 0,432609 | 0,55  | 0,33  | 1        | 5 | Supt4a        |
| 8,6E-05  | 0,3258   | 0,533 | 0,307 | 1        | 5 | Phf5a         |
| 8,64E-05 | 0,27772  | 0,6   | 0,332 | 1        | 5 | Dnajb6        |
| 8,76E-05 | -0,52087 | 0,033 | 0,254 | 1        | 5 | Irf1          |
| 8,99E-05 | 0,329582 | 0,367 | 0,171 | 1        | 5 | Immp1l        |
| 9,05E-05 | -0,55053 | 0,183 | 0,426 | 1        | 5 | Mll3          |
| 9,19E-05 | 0,259499 | 0,25  | 0,098 | 1        | 5 | 9430023L20Rik |
| 9,29E-05 | 0,431613 | 0,683 | 0,455 | 1        | 5 | Cox17         |
| 9,29E-05 | -0,66623 | 0,45  | 0,645 | 1        | 5 | B4galnt1      |
| 9,98E-05 | -0,52816 | 0,05  | 0,271 | 1        | 5 | Itgb7         |
| 0,0001   | 0,347302 | 0,9   | 0,739 | 1        | 5 | Hnrnpf        |
| 0,0001   | 0,266189 | 0,183 | 0,06  | 1        | 5 | Hmga2-ps1     |
| 0,000101 | 0,379574 | 0,517 | 0,292 | 1        | 5 | Cyb5r4        |

|          |          |       |       |     |               |
|----------|----------|-------|-------|-----|---------------|
| 0,000102 | -0,52212 | 0,067 | 0,296 | 1 5 | Cd84          |
| 0,000102 | -0,53986 | 0,283 | 0,509 | 1 5 | Vasp          |
| 0,000102 | -0,67429 | 0,517 | 0,711 | 1 5 | Erdr1         |
| 0,000102 | 0,369197 | 0,333 | 0,153 | 1 5 | C1d           |
| 0,000103 | 0,353035 | 0,483 | 0,262 | 1 5 | Sun2          |
| 0,000105 | -0,53568 | 0,05  | 0,275 | 1 5 | Fgd2          |
| 0,00011  | -0,45311 | 0,033 | 0,254 | 1 5 | Hhex          |
| 0,000111 | 0,34304  | 0,567 | 0,342 | 1 5 | Dars          |
| 0,000112 | -0,58393 | 0,033 | 0,248 | 1 5 | Cd55          |
| 0,000117 | 0,385205 | 0,8   | 0,61  | 1 5 | Rap1a         |
| 0,000118 | 0,334334 | 0,333 | 0,157 | 1 5 | Txndc11       |
| 0,000128 | 0,42776  | 0,817 | 0,544 | 1 5 | Rac1          |
| 0,000132 | -0,3309  | 1     | 0,999 | 1 5 | Rplp1         |
| 0,000139 | 0,282193 | 0,333 | 0,15  | 1 5 | Gtf2h1        |
| 0,000139 | 0,369329 | 0,6   | 0,374 | 1 5 | Psmc2         |
| 0,000142 | 0,270917 | 0,333 | 0,148 | 1 5 | Hiat1         |
| 0,000143 | 0,289486 | 0,983 | 0,956 | 1 5 | Myl6          |
| 0,000146 | 0,645542 | 0,95  | 0,761 | 1 5 | Tuba1b        |
| 0,000148 | 0,324367 | 1     | 0,983 | 1 5 | Arpc2         |
| 0,00015  | 0,395577 | 0,983 | 0,988 | 1 5 | Lcp1          |
| 0,000154 | 0,285971 | 0,583 | 0,34  | 1 5 | Psmb6         |
| 0,000158 | 0,39972  | 0,667 | 0,458 | 1 5 | Trmt112       |
| 0,000159 | 0,47031  | 0,433 | 0,248 | 1 5 | Ogfrl1        |
| 0,00016  | 0,288958 | 0,383 | 0,188 | 1 5 | Cnot6         |
| 0,000165 | 0,296954 | 0,783 | 0,513 | 1 5 | Nedd8         |
| 0,000166 | 0,496025 | 0,633 | 0,443 | 1 5 | Yeats4        |
| 0,000166 | -0,49224 | 0,017 | 0,219 | 1 5 | Lgals9        |
| 0,000167 | 0,389355 | 0,35  | 0,171 | 1 5 | Ngfrap1       |
| 0,000167 | 0,468538 | 0,783 | 0,572 | 1 5 | Klhl6         |
| 0,000168 | 0,323446 | 0,667 | 0,436 | 1 5 | Atp5o         |
| 0,000168 | 0,350125 | 0,483 | 0,277 | 1 5 | Esd           |
| 0,00017  | 0,345794 | 0,483 | 0,267 | 1 5 | Slc30a5       |
| 0,000175 | -0,55625 | 0,033 | 0,239 | 1 5 | Zfp318        |
| 0,000175 | 0,353658 | 0,9   | 0,78  | 1 5 | Cox8a         |
| 0,000178 | -0,5633  | 0,233 | 0,471 | 1 5 | Pld4          |
| 0,000179 | -0,41321 | 0,983 | 0,987 | 1 5 | Ptprc         |
| 0,000181 | 0,339467 | 0,517 | 0,307 | 1 5 | Kars          |
| 0,000182 | 0,318219 | 0,3   | 0,135 | 1 5 | 4933421O10Rik |
| 0,000185 | 0,337275 | 0,583 | 0,354 | 1 5 | Ppp2r5c       |
| 0,000187 | -0,29453 | 1     | 1     | 1 5 | Rpl5          |
| 0,000189 | 0,306043 | 0,467 | 0,252 | 1 5 | Ube2m         |
| 0,00019  | -0,45673 | 0,7   | 0,858 | 1 5 | Eif4a2        |
| 0,000192 | -0,48694 | 0,1   | 0,324 | 1 5 | Usp34         |
| 0,000194 | 0,334171 | 0,75  | 0,543 | 1 5 | Eif3k         |
| 0,000195 | 0,379708 | 0,55  | 0,321 | 1 5 | Rnf19b        |
| 0,0002   | 0,265446 | 0,467 | 0,257 | 1 5 | Pcf11         |
| 0,000202 | 0,405276 | 0,8   | 0,555 | 1 5 | Tra2b         |
| 0,000206 | 0,438138 | 0,7   | 0,483 | 1 5 | Arpc3         |
| 0,000206 | -0,47554 | 0,083 | 0,298 | 1 5 | Jhdm1d        |
| 0,000207 | 0,30442  | 0,583 | 0,35  | 1 5 | Uqcrc1        |

|          |          |       |       |     |          |
|----------|----------|-------|-------|-----|----------|
| 0,00021  | -0,36794 | 1     | 0,991 | 1 5 | Rpl11    |
| 0,000211 | 0,363357 | 0,333 | 0,16  | 1 5 | Dhx40    |
| 0,000212 | 0,330808 | 0,683 | 0,441 | 1 5 | Cerk     |
| 0,000212 | 0,35931  | 0,367 | 0,185 | 1 5 | Fam20b   |
| 0,000216 | -0,46934 | 0,55  | 0,724 | 1 5 | Gm9846   |
| 0,000217 | 0,318797 | 0,483 | 0,278 | 1 5 | Ap1s3    |
| 0,000221 | 0,300148 | 0,633 | 0,394 | 1 5 | Ap2s1    |
| 0,000222 | 0,298693 | 0,833 | 0,597 | 1 5 | Gna13    |
| 0,000222 | 0,285534 | 0,7   | 0,425 | 1 5 | Atp5k    |
| 0,000224 | -0,51747 | 0,117 | 0,341 | 1 5 | Ragef4   |
| 0,000226 | 0,367765 | 0,567 | 0,362 | 1 5 | Rab1     |
| 0,000226 | 0,338084 | 0,567 | 0,339 | 1 5 | Rnf114   |
| 0,000234 | 0,262822 | 0,5   | 0,269 | 1 5 | Atp6v1d  |
| 0,000237 | 0,454675 | 0,75  | 0,553 | 1 5 | Vcp      |
| 0,000237 | -0,52386 | 0,067 | 0,273 | 1 5 | Man1a    |
| 0,000243 | -0,29776 | 1     | 1     | 1 5 | Cd79a    |
| 0,000244 | 0,346191 | 0,7   | 0,476 | 1 5 | Psma2    |
| 0,000247 | -0,69604 | 0,467 | 0,615 | 1 5 | Mll5     |
| 0,000247 | -0,3921  | 0     | 0,186 | 1 5 | Il10rb   |
| 0,000262 | 0,347706 | 0,417 | 0,218 | 1 5 | Ube2v2   |
| 0,000262 | -0,64766 | 0,217 | 0,414 | 1 5 | Anxa6    |
| 0,000264 | 0,315507 | 0,35  | 0,169 | 1 5 | Zfp120   |
| 0,000265 | -0,47901 | 0,217 | 0,461 | 1 5 | Psap     |
| 0,000266 | -0,52437 | 0,117 | 0,335 | 1 5 | Ier5     |
| 0,000266 | 0,350518 | 0,45  | 0,241 | 1 5 | Ifi2712a |
| 0,000273 | -0,51618 | 0,45  | 0,659 | 1 5 | Phip     |
| 0,000275 | 0,382447 | 0,483 | 0,284 | 1 5 | Anapc11  |
| 0,00028  | 0,363694 | 0,467 | 0,274 | 1 5 | Ilk      |
| 0,000283 | 0,253839 | 0,533 | 0,303 | 1 5 | Ibtk     |
| 0,000284 | 0,285269 | 0,183 | 0,065 | 1 5 | Spata24  |
| 0,000286 | 0,259728 | 0,333 | 0,16  | 1 5 | Polr3k   |
| 0,000301 | -0,56856 | 0,317 | 0,499 | 1 5 | Srpk3    |
| 0,000302 | 0,262721 | 0,633 | 0,385 | 1 5 | Bzw1     |
| 0,000308 | -0,56867 | 0,05  | 0,248 | 1 5 | Gpr183   |
| 0,000309 | 0,315502 | 0,567 | 0,34  | 1 5 | Psbmb5   |
| 0,000312 | 0,307472 | 0,35  | 0,177 | 1 5 | Ndufa5   |
| 0,000313 | 0,295179 | 0,7   | 0,437 | 1 5 | Akt1     |
| 0,000315 | 0,365266 | 0,833 | 0,658 | 1 5 | Ppp1ca   |
| 0,000318 | 0,343852 | 0,25  | 0,105 | 1 5 | Stil     |
| 0,000318 | -0,31299 | 0,967 | 0,997 | 1 5 | Rps28    |
| 0,00032  | 0,292924 | 0,283 | 0,126 | 1 5 | H1f0     |
| 0,000328 | 0,321449 | 0,367 | 0,189 | 1 5 | Grpel2   |
| 0,00033  | 0,315558 | 0,517 | 0,298 | 1 5 | Selk     |
| 0,000333 | 0,294451 | 0,483 | 0,268 | 1 5 | Aldh9a1  |
| 0,000336 | -0,63158 | 0,75  | 0,856 | 1 5 | Apoe     |
| 0,00034  | -0,60726 | 0,317 | 0,508 | 1 5 | Gimap8   |
| 0,000344 | -0,47068 | 0,233 | 0,457 | 1 5 | Dennd5b  |
| 0,000345 | 0,463249 | 0,683 | 0,509 | 1 5 | Prrc2a   |
| 0,000348 | -0,47848 | 0,167 | 0,383 | 1 5 | Sorl1    |
| 0,000349 | 0,268608 | 0,55  | 0,329 | 1 5 | Ndufv2   |

|          |          |       |       |     |               |
|----------|----------|-------|-------|-----|---------------|
| 0,000351 | 0,307802 | 0,483 | 0,286 | 1 5 | Znrd1         |
| 0,000357 | 0,301662 | 0,4   | 0,216 | 1 5 | Vdac1         |
| 0,000365 | 0,412133 | 0,3   | 0,146 | 1 5 | Prep          |
| 0,000367 | 0,352388 | 0,467 | 0,275 | 1 5 | Psmc3         |
| 0,00037  | 0,274213 | 0,733 | 0,509 | 1 5 | Eif4h         |
| 0,000372 | -0,44773 | 0,117 | 0,328 | 1 5 | Tspan32       |
| 0,000373 | 0,256398 | 0,383 | 0,191 | 1 5 | Isca1         |
| 0,000383 | 0,25645  | 0,217 | 0,087 | 1 5 | Sqle          |
| 0,000384 | -0,46305 | 0,083 | 0,29  | 1 5 | Esyt1         |
| 0,000393 | 0,287513 | 0,5   | 0,284 | 1 5 | Eif2ak3       |
| 0,000398 | 0,261185 | 0,35  | 0,174 | 1 5 | Nfyb          |
| 0,0004   | 0,315391 | 0,733 | 0,508 | 1 5 | Cct5          |
| 0,000406 | 0,291876 | 0,983 | 0,929 | 1 5 | Psemb8        |
| 0,00041  | 0,420027 | 0,55  | 0,353 | 1 5 | Arl5a         |
| 0,000414 | 0,396499 | 0,867 | 0,655 | 1 5 | Eif3h         |
| 0,000416 | -0,33576 | 1     | 0,999 | 1 5 | Rpl12         |
| 0,000416 | -0,51004 | 0,767 | 0,814 | 1 5 | Btg1          |
| 0,000423 | 0,419821 | 0,6   | 0,4   | 1 5 | Zfp106        |
| 0,000426 | 0,472035 | 0,567 | 0,354 | 1 5 | Anapc16       |
| 0,00044  | -0,44349 | 1     | 0,98  | 1 5 | H2-K1         |
| 0,000441 | 0,346191 | 0,7   | 0,491 | 1 5 | Atp5f1        |
| 0,000452 | -0,46747 | 0,15  | 0,361 | 1 5 | Myl12b        |
| 0,000457 | 0,413055 | 0,383 | 0,207 | 1 5 | Trp53inp1     |
| 0,000459 | 0,273646 | 0,667 | 0,425 | 1 5 | Xpo1          |
| 0,000466 | 0,350002 | 0,867 | 0,664 | 1 5 | Cox6a1        |
| 0,000477 | 0,279521 | 0,483 | 0,28  | 1 5 | Pak2          |
| 0,000481 | 0,322053 | 0,5   | 0,302 | 1 5 | Bnip2         |
| 0,00049  | 0,301527 | 0,483 | 0,269 | 1 5 | Mrps14        |
| 0,000497 | 0,316206 | 0,433 | 0,237 | 1 5 | Gtf2a1        |
| 0,000504 | -0,4848  | 0,4   | 0,574 | 1 5 | Arhgap4       |
| 0,000513 | 0,253057 | 0,65  | 0,4   | 1 5 | Dcaf12        |
| 0,000527 | -0,48215 | 0,117 | 0,319 | 1 5 | Lrrc33        |
| 0,000542 | 0,253181 | 0,317 | 0,154 | 1 5 | Fxr1          |
| 0,000562 | -0,59559 | 0,017 | 0,192 | 1 5 | Plac8         |
| 0,000564 | 0,311966 | 0,217 | 0,089 | 1 5 | 2510003E04Rik |
| 0,000566 | -0,37575 | 0,017 | 0,193 | 1 5 | Cyfip1        |
| 0,000566 | -0,45579 | 0,083 | 0,287 | 1 5 | Chd2          |
| 0,000576 | 0,483647 | 0,617 | 0,444 | 1 5 | Dync1i2       |
| 0,000582 | -0,55447 | 0,367 | 0,568 | 1 5 | Slc38a2       |
| 0,000606 | 0,369812 | 0,467 | 0,267 | 1 5 | Arcn1         |
| 0,000611 | 0,339488 | 0,333 | 0,171 | 1 5 | Nt5c3         |
| 0,000617 | -0,42767 | 0,283 | 0,513 | 1 5 | Ralgps2       |
| 0,00062  | 0,265789 | 0,85  | 0,58  | 1 5 | Dnaja1        |
| 0,000627 | -0,47346 | 0,167 | 0,376 | 1 5 | Cyb561a3      |
| 0,000631 | -0,3218  | 0,983 | 0,988 | 1 5 | Rpl35         |
| 0,000633 | -0,3746  | 0,017 | 0,19  | 1 5 | Abcg1         |
| 0,000637 | 0,309388 | 0,7   | 0,464 | 1 5 | Rbx1          |
| 0,000637 | -0,31368 | 0,983 | 0,997 | 1 5 | Rps11         |
| 0,000639 | 0,295476 | 0,217 | 0,092 | 1 5 | Flt3          |
| 0,000661 | 0,289057 | 0,5   | 0,3   | 1 5 | Adss          |

|          |          |       |       |     |               |
|----------|----------|-------|-------|-----|---------------|
| 0,000682 | 0,368977 | 0,417 | 0,228 | 1 5 | Nt5e          |
| 0,000704 | 0,288463 | 0,8   | 0,566 | 1 5 | Cox7b         |
| 0,000712 | 0,28068  | 0,75  | 0,533 | 1 5 | Vdac2         |
| 0,000713 | 0,3247   | 0,467 | 0,274 | 1 5 | Mdm2          |
| 0,000715 | 0,31959  | 0,8   | 0,59  | 1 5 | Lrmp          |
| 0,000725 | 0,37933  | 0,217 | 0,094 | 1 5 | Sephs1        |
| 0,00075  | -0,5653  | 0,35  | 0,563 | 1 5 | Gm10785       |
| 0,000753 | -0,59132 | 0,433 | 0,586 | 1 5 | Gimap6        |
| 0,000756 | 0,295797 | 0,45  | 0,261 | 1 5 | Eif4e         |
| 0,000776 | -0,45471 | 0,767 | 0,866 | 1 5 | Tnfrsf13c     |
| 0,000781 | 0,400309 | 0,817 | 0,636 | 1 5 | Sept6         |
| 0,000789 | 0,258029 | 0,567 | 0,347 | 1 5 | Vmp1          |
| 0,00079  | 0,33898  | 0,6   | 0,4   | 1 5 | Glud1         |
| 0,000791 | -0,47634 | 0,183 | 0,395 | 1 5 | Stk10         |
| 0,000793 | 0,254077 | 0,567 | 0,349 | 1 5 | Snrpd1        |
| 0,000794 | 0,274234 | 0,567 | 0,343 | 1 5 | Psm5          |
| 0,000794 | 0,296579 | 0,233 | 0,101 | 1 5 | Pspc1         |
| 0,000795 | -0,3787  | 0,067 | 0,257 | 1 5 | 2900060B14Rik |
| 0,000805 | -0,4222  | 0,067 | 0,255 | 1 5 | Cdkn1b        |
| 0,000818 | -0,49567 | 0,267 | 0,451 | 1 5 | Tgfb2         |
| 0,000832 | -0,52885 | 0,183 | 0,372 | 1 5 | Cytip         |
| 0,00084  | 0,324286 | 0,517 | 0,324 | 1 5 | Brd8          |
| 0,000866 | 0,305809 | 0,933 | 0,844 | 1 5 | Gdi2          |
| 0,00088  | -0,29445 | 1     | 0,999 | 1 5 | Rps23         |
| 0,000909 | 0,367501 | 0,667 | 0,47  | 1 5 | Gnb1          |
| 0,000939 | 0,393911 | 0,75  | 0,567 | 1 5 | Polr1d        |
| 0,000954 | 0,301592 | 0,65  | 0,434 | 1 5 | Ndufb11       |
| 0,000955 | 0,403935 | 0,483 | 0,314 | 1 5 | Tfam          |
| 0,000963 | -0,39016 | 0,1   | 0,297 | 1 5 | Mapk14        |
| 0,000979 | -0,707   | 0,35  | 0,498 | 1 5 | Itga4         |
| 0,000996 | 0,274513 | 0,233 | 0,101 | 1 5 | 2410004B18Rik |
| 0,001011 | -0,36687 | 0,067 | 0,256 | 1 5 | Aff3          |
| 0,001011 | 0,300547 | 0,283 | 0,137 | 1 5 | Lmo7          |
| 0,001025 | 0,351789 | 0,767 | 0,534 | 1 5 | Sec11c        |
| 0,001027 | 0,411779 | 0,617 | 0,427 | 1 5 | Rps6kb1       |
| 0,001031 | 0,28651  | 0,433 | 0,255 | 1 5 | Trappc1       |
| 0,001036 | 0,2731   | 0,483 | 0,276 | 1 5 | Mtmt14        |
| 0,001038 | 0,253728 | 0,433 | 0,241 | 1 5 | Sav1          |
| 0,001047 | 0,290139 | 0,533 | 0,324 | 1 5 | Lpin2         |
| 0,001056 | -0,30297 | 1     | 0,994 | 1 5 | Rps18         |
| 0,001062 | 0,25355  | 0,35  | 0,185 | 1 5 | Mrpl20        |
| 0,001063 | 0,268497 | 0,45  | 0,266 | 1 5 | Alkbh5        |
| 0,001063 | 0,265006 | 0,7   | 0,462 | 1 5 | Cox5a         |
| 0,001096 | 0,667716 | 0,35  | 0,202 | 1 5 | Eif5a2        |
| 0,001099 | -0,29128 | 1     | 0,998 | 1 5 | Uba52         |
| 0,001113 | 0,404314 | 0,517 | 0,343 | 1 5 | Trim35        |
| 0,001121 | -0,32949 | 0     | 0,152 | 1 5 | Cnn3          |
| 0,001134 | 0,291618 | 0,633 | 0,431 | 1 5 | Ube2v1        |
| 0,001142 | -0,56489 | 0,267 | 0,462 | 1 5 | Filip1l       |
| 0,001179 | 0,293389 | 0,3   | 0,154 | 1 5 | I7Rn6         |



|          |          |       |       |     |             |
|----------|----------|-------|-------|-----|-------------|
| 0,001179 | 0,26799  | 0,333 | 0,174 | 1 5 | Gpd1l       |
| 0,001187 | -0,63019 | 0,217 | 0,397 | 1 5 | Dgka        |
| 0,00119  | 0,25184  | 0,417 | 0,233 | 1 5 | Otud1       |
| 0,001198 | 0,315961 | 0,667 | 0,452 | 1 5 | Atp5d       |
| 0,001204 | 0,385623 | 0,767 | 0,655 | 1 5 | Banf1       |
| 0,001215 | 0,302552 | 0,7   | 0,481 | 1 5 | Sec61b      |
| 0,001218 | 0,284008 | 0,517 | 0,324 | 1 5 | Usp19       |
| 0,001232 | 0,255859 | 0,367 | 0,192 | 1 5 | Wbp5        |
| 0,001234 | -0,47081 | 0,717 | 0,803 | 1 5 | Ly86        |
| 0,001251 | 0,253239 | 0,55  | 0,343 | 1 5 | Zfp710      |
| 0,001263 | 0,425311 | 0,517 | 0,325 | 1 5 | BC031181    |
| 0,001274 | 0,272165 | 0,25  | 0,118 | 1 5 | Cnep1r1     |
| 0,001291 | -0,3281  | 0,167 | 0,372 | 1 5 | Psen2       |
| 0,001293 | 0,272165 | 0,583 | 0,38  | 1 5 | Ndufa1      |
| 0,001317 | -0,34395 | 0,067 | 0,242 | 1 5 | Cdk17       |
| 0,001325 | -0,35606 | 0,017 | 0,174 | 1 5 | Cd97        |
| 0,001333 | 0,272694 | 0,467 | 0,267 | 1 5 | D15Ertd621e |
| 0,001336 | 0,35426  | 0,367 | 0,209 | 1 5 | Cops5       |
| 0,001338 | 0,283398 | 0,967 | 0,772 | 1 5 | Tma7        |
| 0,001353 | 0,280764 | 0,583 | 0,375 | 1 5 | Snrpf       |
| 0,001372 | -0,28971 | 0     | 0,147 | 1 5 | Pxdc1       |
| 0,001414 | 0,255092 | 0,367 | 0,199 | 1 5 | Ggta1       |
| 0,001421 | 0,273904 | 0,3   | 0,15  | 1 5 | Cited2      |
| 0,001438 | 0,290979 | 0,517 | 0,308 | 1 5 | Krcc1       |
| 0,001465 | -0,32171 | 1     | 0,999 | 1 5 | Ly6e        |
| 0,001466 | 0,308607 | 0,217 | 0,095 | 1 5 | Taf13       |
| 0,00148  | 0,289556 | 0,35  | 0,19  | 1 5 | Uchl5       |
| 0,001487 | 0,269292 | 0,283 | 0,139 | 1 5 | Asun        |
| 0,001504 | -0,47443 | 0,467 | 0,66  | 1 5 | H2-T23      |
| 0,001511 | -0,32728 | 0,2   | 0,413 | 1 5 | Lyl1        |
| 0,001514 | 0,351516 | 0,917 | 0,854 | 1 5 | Eif5a       |
| 0,001522 | 0,289115 | 0,467 | 0,284 | 1 5 | Atp6v0d1    |
| 0,001536 | 0,322091 | 0,383 | 0,223 | 1 5 | Cstf3       |
| 0,001538 | 0,297458 | 0,4   | 0,228 | 1 5 | Cetn2       |
| 0,001541 | 0,320405 | 0,45  | 0,272 | 1 5 | Cebpg       |
| 0,00156  | 0,34973  | 0,583 | 0,422 | 1 5 | Tra2a       |
| 0,001561 | 0,341466 | 0,417 | 0,257 | 1 5 | Snx1        |
| 0,001615 | 0,307965 | 0,883 | 0,709 | 1 5 | Ube2d2a     |
| 0,001646 | -0,34237 | 0,05  | 0,216 | 1 5 | Tle3        |
| 0,001653 | -0,46776 | 0,217 | 0,396 | 1 5 | Il4ra       |
| 0,001693 | 0,336908 | 0,667 | 0,501 | 1 5 | Top2b       |
| 0,001735 | -0,4508  | 0,483 | 0,652 | 1 5 | Gdi1        |
| 0,001742 | 0,278318 | 0,383 | 0,218 | 1 5 | Mrps36      |
| 0,001742 | 0,392117 | 0,883 | 0,779 | 1 5 | Atp5g2      |
| 0,001763 | 0,258236 | 0,517 | 0,323 | 1 5 | Cat         |
| 0,001765 | -0,38599 | 0,067 | 0,243 | 1 5 | Zscan26     |
| 0,001776 | 0,323568 | 0,9   | 0,698 | 1 5 | Basp1       |
| 0,001809 | 0,293607 | 0,417 | 0,246 | 1 5 | Mbd1        |
| 0,001831 | 0,272551 | 0,5   | 0,306 | 1 5 | Eif1ax      |
| 0,001834 | 0,250205 | 0,4   | 0,231 | 1 5 | Rap2c       |

|          |          |       |       |     |                |
|----------|----------|-------|-------|-----|----------------|
| 0,00184  | 0,289304 | 0,367 | 0,209 | 1 5 | Pim1           |
| 0,001845 | 0,264051 | 0,467 | 0,281 | 1 5 | Cnih           |
| 0,001847 | 0,358026 | 0,417 | 0,262 | 1 5 | Ruvbl2         |
| 0,001866 | 0,257613 | 0,383 | 0,218 | 1 5 | Rtfdc1         |
| 0,001874 | 0,282053 | 0,417 | 0,247 | 1 5 | Hadha          |
| 0,001878 | -0,28987 | 0,017 | 0,167 | 1 5 | 9930111J21Rik1 |
| 0,001884 | 0,262103 | 0,233 | 0,11  | 1 5 | Rpp14          |
| 0,001895 | 0,387541 | 0,917 | 0,842 | 1 5 | Ybx1           |
| 0,001909 | 0,324666 | 0,433 | 0,276 | 1 5 | Cstb           |
| 0,001935 | -0,31766 | 0,05  | 0,212 | 1 5 | C1qbp          |
| 0,001958 | -0,3986  | 0,083 | 0,256 | 1 5 | Plekhm3        |
| 0,001977 | -0,27223 | 0     | 0,139 | 1 5 | Fxyd5          |
| 0,002002 | 0,302935 | 0,433 | 0,261 | 1 5 | Trpc4ap        |
| 0,002008 | 0,303631 | 0,367 | 0,21  | 1 5 | Mid1ip1        |
| 0,002012 | -0,32239 | 0,1   | 0,284 | 1 5 | Dennd4b        |
| 0,002044 | 0,26813  | 0,45  | 0,278 | 1 5 | Babam1         |
| 0,002058 | -0,34822 | 0,217 | 0,411 | 1 5 | Zcchc7         |
| 0,002061 | -0,33552 | 0,05  | 0,211 | 1 5 | Phf1           |
| 0,002102 | -0,33988 | 0,083 | 0,257 | 1 5 | Cyth4          |
| 0,002116 | -0,51091 | 0,617 | 0,697 | 1 5 | Chst3          |
| 0,002187 | 0,274103 | 0,75  | 0,543 | 1 5 | Cct4           |
| 0,002242 | -0,35218 | 0,467 | 0,675 | 1 5 | Dock8          |
| 0,002283 | 0,29779  | 0,367 | 0,21  | 1 5 | Atp6ap2        |
| 0,002295 | 0,350897 | 0,45  | 0,28  | 1 5 | Chordc1        |
| 0,002304 | -0,35158 | 0,117 | 0,289 | 1 5 | Gripap1        |
| 0,002309 | 0,303656 | 0,783 | 0,572 | 1 5 | Prr13          |
| 0,002326 | 0,328491 | 0,367 | 0,214 | 1 5 | Lgmn           |
| 0,002331 | -0,43899 | 0,233 | 0,413 | 1 5 | Rapgef6        |
| 0,002333 | -0,46098 | 0,317 | 0,512 | 1 5 | Gpr18          |
| 0,002393 | -0,69245 | 0,533 | 0,656 | 1 5 | Vmn2r55        |
| 0,002421 | -0,25708 | 0     | 0,134 | 1 5 | Gabbr1         |
| 0,002446 | 0,286669 | 0,767 | 0,569 | 1 5 | Akr1a1         |
| 0,00245  | 0,270276 | 0,5   | 0,322 | 1 5 | Psmc6          |
| 0,002466 | 0,294617 | 0,433 | 0,261 | 1 5 | Psmd13         |
| 0,002531 | 0,289127 | 0,283 | 0,154 | 1 5 | Crcp           |
| 0,002617 | 0,265032 | 0,783 | 0,557 | 1 5 | Scaf11         |
| 0,002622 | -0,32185 | 0,017 | 0,159 | 1 5 | Ddx58          |
| 0,002667 | 0,285399 | 0,367 | 0,215 | 1 5 | Sra1           |
| 0,002677 | 0,296995 | 0,35  | 0,202 | 1 5 | Atp6v1h        |
| 0,002736 | 0,274536 | 0,267 | 0,137 | 1 5 | Lias           |
| 0,002752 | 0,266486 | 0,4   | 0,238 | 1 5 | Nop58          |
| 0,002764 | -0,3556  | 0,067 | 0,232 | 1 5 | Neat1          |
| 0,00284  | -0,35839 | 0,017 | 0,157 | 1 5 | Cd38           |
| 0,002841 | 0,252399 | 0,8   | 0,606 | 1 5 | Sod1           |
| 0,002873 | 0,274785 | 0,817 | 0,62  | 1 5 | Cox6b1         |
| 0,002948 | 0,375296 | 0,517 | 0,372 | 1 5 | Ube2n          |
| 0,002962 | -0,37072 | 0,25  | 0,444 | 1 5 | Ogt            |
| 0,003005 | -0,41867 | 0,183 | 0,36  | 1 5 | Ankrd44        |
| 0,003022 | -0,40376 | 0,05  | 0,205 | 1 5 | Scml4          |
| 0,003046 | 0,269951 | 0,65  | 0,433 | 1 5 | Ccm2           |

|          |          |       |       |     |          |
|----------|----------|-------|-------|-----|----------|
| 0,003096 | 0,305524 | 0,75  | 0,55  | 1 5 | Papola   |
| 0,003096 | -0,29    | 0,05  | 0,211 | 1 5 | Sbk1     |
| 0,003099 | -0,26657 | 0     | 0,128 | 1 5 | Ski      |
| 0,00313  | 0,438729 | 0,25  | 0,127 | 1 5 | Ccdc88a  |
| 0,00317  | 0,274712 | 0,5   | 0,318 | 1 5 | Hnrnp2   |
| 0,003196 | 0,29392  | 0,517 | 0,349 | 1 5 | Chmp2a   |
| 0,003225 | 0,287671 | 0,367 | 0,214 | 1 5 | Smim15   |
| 0,003228 | 0,277978 | 0,317 | 0,168 | 1 5 | Uhrf2    |
| 0,003244 | 0,334478 | 0,533 | 0,342 | 1 5 | Rps27l   |
| 0,003275 | 0,267147 | 0,217 | 0,104 | 1 5 | Slc41a1  |
| 0,003281 | -0,31767 | 0,017 | 0,154 | 1 5 | Ckap4    |
| 0,003322 | -0,41162 | 0,1   | 0,258 | 1 5 | Mdn1     |
| 0,00334  | 0,279819 | 0,45  | 0,279 | 1 5 | Pias1    |
| 0,003375 | -0,4711  | 0,683 | 0,77  | 1 5 | Prkcb    |
| 0,003411 | 0,297023 | 0,567 | 0,39  | 1 5 | Map1lc3b |
| 0,003414 | 0,262384 | 0,267 | 0,138 | 1 5 | Pfdn4    |
| 0,003461 | -0,44178 | 0,333 | 0,493 | 1 5 | Sh3bp5   |
| 0,003596 | -0,57926 | 0,267 | 0,414 | 1 5 | Add3     |
| 0,003605 | 0,251032 | 0,333 | 0,19  | 1 5 | Atp6v1e1 |
| 0,003678 | 0,301552 | 0,483 | 0,329 | 1 5 | Srp9     |
| 0,003726 | 0,286281 | 0,983 | 0,992 | 1 5 | Srgn     |
| 0,00376  | 0,307802 | 0,383 | 0,239 | 1 5 | Usp14    |
| 0,003816 | -0,45435 | 0,233 | 0,391 | 1 5 | Slc7a1   |
| 0,003822 | -0,40785 | 0,667 | 0,75  | 1 5 | Hmha1    |
| 0,00384  | 0,290701 | 0,833 | 0,671 | 1 5 | Prkar1a  |
| 0,003864 | -0,37998 | 0,6   | 0,693 | 1 5 | Aldoa    |
| 0,00398  | -0,26959 | 0,017 | 0,149 | 1 5 | Setd1b   |
| 0,004018 | -0,3066  | 0,05  | 0,196 | 1 5 | Sema4b   |
| 0,004057 | -0,33732 | 0     | 0,122 | 1 5 | Gbp7     |
| 0,004114 | 0,257698 | 0,45  | 0,279 | 1 5 | Gorasp2  |
| 0,00414  | -0,2672  | 0     | 0,121 | 1 5 | Tmem154  |
| 0,004143 | -0,41276 | 0,15  | 0,312 | 1 5 | Zmiz1    |
| 0,004148 | 0,303485 | 0,383 | 0,238 | 1 5 | Dpm2     |
| 0,004179 | 0,254508 | 0,8   | 0,622 | 1 5 | Snrpg    |
| 0,004402 | -0,43859 | 0,45  | 0,602 | 1 5 | Ncor1    |
| 0,004406 | 0,257927 | 0,667 | 0,501 | 1 5 | Rabgap1l |
| 0,004412 | -0,3315  | 0,05  | 0,193 | 1 5 | Kynu     |
| 0,004419 | 0,250347 | 0,6   | 0,412 | 1 5 | Psmc8    |
| 0,00445  | 0,393275 | 0,4   | 0,249 | 1 5 | Tmem184c |
| 0,004507 | 0,259949 | 0,533 | 0,363 | 1 5 | Rad23b   |
| 0,004508 | -0,34193 | 0,183 | 0,352 | 1 5 | Itpr3    |
| 0,004518 | 0,407554 | 0,65  | 0,466 | 1 5 | Elf1     |
| 0,004521 | 0,29638  | 0,483 | 0,329 | 1 5 | Psmc4    |
| 0,004524 | -0,40297 | 0,25  | 0,423 | 1 5 | Ash1l    |
| 0,004553 | -0,39503 | 0,6   | 0,734 | 1 5 | Ptk2b    |
| 0,004578 | 0,28727  | 0,8   | 0,617 | 1 5 | Stk4     |
| 0,004584 | 0,32624  | 0,383 | 0,234 | 1 5 | Klhl24   |
| 0,004621 | -0,41486 | 0,267 | 0,452 | 1 5 | Nipbl    |
| 0,004664 | 0,281888 | 0,367 | 0,218 | 1 5 | Sf3a1    |
| 0,004666 | -0,32742 | 0,1   | 0,258 | 1 5 | Slc25a37 |

|          |          |       |       |     |               |
|----------|----------|-------|-------|-----|---------------|
| 0,004671 | 0,349093 | 0,467 | 0,317 | 1 5 | Sdcbp         |
| 0,004689 | 0,289263 | 0,6   | 0,448 | 1 5 | Fkbp1a        |
| 0,004701 | 0,314575 | 0,35  | 0,21  | 1 5 | Bag1          |
| 0,00472  | -0,25454 | 0     | 0,118 | 1 5 | Adamts10      |
| 0,004812 | -0,2782  | 0,217 | 0,405 | 1 5 | Cdk13         |
| 0,004929 | 0,26266  | 0,25  | 0,131 | 1 5 | Prps1         |
| 0,005027 | -0,43387 | 0,2   | 0,353 | 1 5 | Nxpe3         |
| 0,005093 | -0,37219 | 0,1   | 0,253 | 1 5 | Itpr1         |
| 0,005265 | 0,306785 | 0,633 | 0,445 | 1 5 | Psip1         |
| 0,005299 | -0,29535 | 0,017 | 0,142 | 1 5 | Nfic          |
| 0,005311 | 0,289271 | 0,417 | 0,266 | 1 5 | Syf2          |
| 0,005391 | -0,32214 | 0,067 | 0,213 | 1 5 | Tcp11l2       |
| 0,005394 | 0,29514  | 0,233 | 0,12  | 1 5 | Nup93         |
| 0,005443 | 0,257996 | 0,5   | 0,336 | 1 5 | Smarce1       |
| 0,005465 | -0,32006 | 0,85  | 0,897 | 1 5 | H2-DMa        |
| 0,005473 | -0,39705 | 0,133 | 0,292 | 1 5 | Rfx5          |
| 0,005506 | 0,275155 | 0,333 | 0,19  | 1 5 | Mtmr3         |
| 0,005541 | -0,38747 | 0,583 | 0,777 | 1 5 | Jak1          |
| 0,00603  | 0,315034 | 0,433 | 0,283 | 1 5 | Cdc34         |
| 0,006089 | -0,27268 | 0,017 | 0,139 | 1 5 | Ccr7          |
| 0,006104 | -0,3031  | 0,05  | 0,186 | 1 5 | Sfn2          |
| 0,00611  | -0,43396 | 0,467 | 0,603 | 1 5 | Atrx          |
| 0,006166 | 0,255976 | 0,567 | 0,391 | 1 5 | 0610009D07Rik |
| 0,006181 | 0,269495 | 0,883 | 0,711 | 1 5 | Hnrnpab       |
| 0,006236 | -0,29088 | 0,067 | 0,207 | 1 5 | Bcor          |
| 0,006474 | 0,350744 | 0,367 | 0,234 | 1 5 | Slamf7        |
| 0,006572 | 0,351037 | 0,467 | 0,308 | 1 5 | Cdc25b        |
| 0,006587 | 0,289413 | 0,517 | 0,364 | 1 5 | Eif3d         |
| 0,006639 | -0,39379 | 0,2   | 0,355 | 1 5 | Klf13         |
| 0,006674 | -0,38296 | 0,267 | 0,428 | 1 5 | Nfkb2         |
| 0,006748 | 0,291578 | 0,517 | 0,371 | 1 5 | Ktn1          |
| 0,00684  | 0,363657 | 0,6   | 0,46  | 1 5 | Ptbp1         |
| 0,006869 | 0,315541 | 0,267 | 0,148 | 1 5 | Mpp1          |
| 0,006906 | -0,35885 | 0,15  | 0,296 | 1 5 | Mga           |
| 0,006979 | 0,418063 | 0,4   | 0,251 | 1 5 | Nrgn          |
| 0,007018 | -0,30737 | 0,05  | 0,193 | 1 5 | Kctd12        |
| 0,007079 | -0,32327 | 0,1   | 0,251 | 1 5 | Iqsec1        |
| 0,007154 | -0,36627 | 0,333 | 0,476 | 1 5 | Uvrag         |
| 0,007199 | 0,251836 | 0,733 | 0,526 | 1 5 | Sqstm1        |
| 0,007268 | 0,320573 | 0,35  | 0,215 | 1 5 | Setd8         |
| 0,007286 | -0,2534  | 0,017 | 0,135 | 1 5 | Prkce         |
| 0,007362 | -0,33144 | 0,033 | 0,159 | 1 5 | Kbtbd11       |
| 0,007397 | 0,304094 | 0,483 | 0,34  | 1 5 | Lsm6          |
| 0,007398 | 0,303039 | 0,533 | 0,372 | 1 5 | Tmed2         |
| 0,007618 | -0,26763 | 0,033 | 0,159 | 1 5 | Qdpr          |
| 0,007621 | 0,293334 | 0,617 | 0,454 | 1 5 | Il17ra        |
| 0,007621 | 0,296152 | 0,883 | 0,788 | 1 5 | Trp53i11      |
| 0,007642 | -0,26641 | 0,033 | 0,158 | 1 5 | Arhgef3       |
| 0,007792 | 0,266431 | 0,517 | 0,36  | 1 5 | Mrps21        |
| 0,0078   | -0,25729 | 0,05  | 0,181 | 1 5 | Rab24         |

|          |          |       |       |     |               |
|----------|----------|-------|-------|-----|---------------|
| 0,007859 | -0,44181 | 0,433 | 0,559 | 1 5 | Samd9l        |
| 0,00794  | 0,259438 | 0,883 | 0,782 | 1 5 | Pkm           |
| 0,007947 | 0,320333 | 0,583 | 0,44  | 1 5 | Sept7         |
| 0,008046 | -0,40735 | 0,4   | 0,532 | 1 5 | Cxcr5         |
| 0,008089 | 0,271174 | 0,4   | 0,258 | 1 5 | Psmc4         |
| 0,008112 | 0,321005 | 0,367 | 0,236 | 1 5 | Nup88         |
| 0,008162 | -0,30199 | 0,433 | 0,586 | 1 5 | Mif4gd        |
| 0,008292 | -0,38637 | 0,5   | 0,618 | 1 5 | Gimap1        |
| 0,008309 | 0,257848 | 0,633 | 0,449 | 1 5 | 2810407C02Rik |
| 0,008375 | 0,314227 | 0,45  | 0,303 | 1 5 | Ttc9c         |
| 0,00856  | 0,264209 | 0,6   | 0,451 | 1 5 | Atp5j2        |
| 0,00857  | -0,28625 | 0,133 | 0,283 | 1 5 | H13           |
| 0,008653 | 0,253659 | 0,3   | 0,177 | 1 5 | Eaf1          |
| 0,008724 | -0,36455 | 0,4   | 0,528 | 1 5 | Ivns1abp      |
| 0,008855 | -0,36579 | 0,417 | 0,584 | 1 5 | Rbm25         |
| 0,008938 | 0,275749 | 0,567 | 0,41  | 1 5 | Ppp6r1        |
| 0,008951 | -0,33256 | 0,017 | 0,13  | 1 5 | Serpina3g     |
| 0,009048 | 0,2521   | 0,45  | 0,287 | 1 5 | Adnp          |
| 0,009118 | -0,2698  | 0,067 | 0,199 | 1 5 | Ric8          |
| 0,00912  | -0,34932 | 0,5   | 0,64  | 1 5 | Fam49b        |
| 0,009122 | -0,29664 | 0,05  | 0,177 | 1 5 | 2310061I04Rik |
| 0,009188 | 0,276753 | 0,483 | 0,338 | 1 5 | Bcl7a         |
| 0,009235 | -0,25778 | 0,017 | 0,129 | 1 5 | Plbd1         |
| 0,009285 | -0,25708 | 0     | 0,102 | 1 5 | Ffar2         |
| 0,009364 | 0,304733 | 0,567 | 0,425 | 1 5 | Psma4         |
| 0,009375 | 0,270994 | 0,6   | 0,451 | 1 5 | Coro1b        |
| 0,009413 | -0,54141 | 0,4   | 0,525 | 1 5 | Foxp1         |
| 0,009587 | -0,42631 | 0,483 | 0,598 | 1 5 | Zbtb20        |
| 0,009717 | -0,43556 | 0,383 | 0,519 | 1 5 | Akap8         |
| 0,009781 | 0,297701 | 0,333 | 0,209 | 1 5 | Cript         |
| 0,009814 | -0,30563 | 0,317 | 0,484 | 1 5 | Lyn           |
| 0,009815 | -0,32454 | 0,983 | 0,99  | 1 5 | Cd53          |
| 0,00984  | -0,28594 | 0,15  | 0,305 | 1 5 | Pbxip1        |
| 0,009969 | 0,316459 | 0,4   | 0,268 | 1 5 | Mrpl51        |
